# Supplementary material
Source: publisher figshare collection journal article supplement (https://acs.figshare.com/ndownloader/files/3879559)
Supplement: Supplementary file 1 [file 3879559]

 
data_x13085_t5 
  

# start Validation Reply Form
_vrf_PLAT029_x13085_t5
;
PROBLEM: _diffrn_measured_fraction_theta_full Low .......      0.943       
RESPONSE: Data collection strategy was adequate: seven 360 degree
          phi scans two shorter phi scans (240 and 160 degrees)
          and one 80 degree omega scan.  Both twin domains 
          were included into the HKLF5 format file.  
;
# end Validation Reply Form


_audit_creation_method            SHELXL-2012 
_chemical_name_systematic 
; 
 ? 
; 
_chemical_name_common             ? 
_chemical_melting_point           ? 
_chemical_formula_moiety          ? 
_chemical_formula_sum 
 'C15 H39 N4 O Si3 V' 
_chemical_formula_weight          426.71 
  
loop_ 
 _atom_type_symbol 
 _atom_type_description 
 _atom_type_scat_dispersion_real 
 _atom_type_scat_dispersion_imag 
 _atom_type_scat_source 
 'C'  'C'   0.0033   0.0016 
 'International Tables Vol C Tables 4.2.6.8 and 6.1.1.4' 
 'H'  'H'   0.0000   0.0000 
 'International Tables Vol C Tables 4.2.6.8 and 6.1.1.4' 
 'N'  'N'   0.0061   0.0033 
 'International Tables Vol C Tables 4.2.6.8 and 6.1.1.4' 
 'O'  'O'   0.0106   0.0060 
 'International Tables Vol C Tables 4.2.6.8 and 6.1.1.4' 
 'Si'  'Si'   0.0817   0.0704 
 'International Tables Vol C Tables 4.2.6.8 and 6.1.1.4' 
 'V'  'V'   0.3005   0.5294 
 'International Tables Vol C Tables 4.2.6.8 and 6.1.1.4' 
  
_space_group_crystal_system       triclinic 
_space_group_IT_number            2 
_space_group_name_H-M_alt         'P -1' 
_space_group_name_Hall            '-P 1' 
  
_shelx_space_group_comment 
; 
The symmetry employed for this shelxl refinement is uniquely defined 
by the following loop, which should always be used as a source of 
symmetry information in preference to the above space-group names. 
They are only intended as comments. 
; 
  
loop_ 
 _space_group_symop_operation_xyz 
 'x, y, z' 
 '-x, -y, -z' 
  
_cell_length_a                    9.6971(6) 
_cell_length_b                    16.2957(10) 
_cell_length_c                    16.5852(10) 
_cell_angle_alpha                 66.3410(10) 
_cell_angle_beta                  89.977(2) 
_cell_angle_gamma                 79.480(2) 
_cell_volume                      2352.4(3) 
_cell_formula_units_Z             4 
_cell_measurement_temperature     100(2) 
_cell_measurement_reflns_used     9889 
_cell_measurement_theta_min       2.31 
_cell_measurement_theta_max       30.52 
  
_exptl_crystal_description        block 
_exptl_crystal_colour             yellow 
_exptl_crystal_density_meas       . 
_exptl_crystal_density_method     'not measured' 
_exptl_crystal_density_diffrn     1.205 
_exptl_crystal_F_000              920 
_exptl_transmission_factor_min    ? 
_exptl_transmission_factor_max    ? 
_exptl_crystal_size_max           0.200 
_exptl_crystal_size_mid           0.100 
_exptl_crystal_size_min           0.100 
_exptl_absorpt_coefficient_mu     0.585 
_shelx_estimated_absorpt_T_min    0.892 
_shelx_estimated_absorpt_T_max    0.944 
_exptl_absorpt_correction_type    multi-scan 
_exptl_absorpt_correction_T_min   0.566916  
_exptl_absorpt_correction_T_max   0.746070  
_exptl_absorpt_process_details    'TWINABS (Sheldrick, 2009)' 
  
_exptl_special_details 
; 
 Bruker X8 Kappa DUO four-circle diffractometer, Bruker APEX2 CCD. 
 The instrument was purchased with the help of funding from the 
 National Science Foundation (NSF) under Grant Number 
 CHE-0946721.  Please acknowledge this grant in all publications 
 of this structure. 
; 
  
_diffrn_ambient_temperature       100(2) 
_diffrn_radiation_wavelength      0.71073 
_diffrn_radiation_type            MoK\a 
_diffrn_source                    'I\mS micro-focus sealed tube, multilayer optics' 
_diffrn_measurement_device_type   'Bruker Smart APEX2 CCD' 
_diffrn_measurement_method        '\f and \w scans' 
_diffrn_detector_area_resol_mean  8.3 
_diffrn_reflns_number             17550 
_diffrn_reflns_av_unetI/netI      0.0300 
_diffrn_reflns_av_R_equivalents   0.0393  
_diffrn_reflns_limit_h_min        -13 
_diffrn_reflns_limit_h_max        13 
_diffrn_reflns_limit_k_min        -20 
_diffrn_reflns_limit_k_max        23 
_diffrn_reflns_limit_l_min        0 
_diffrn_reflns_limit_l_max        22 
_diffrn_reflns_theta_min          1.345 
_diffrn_reflns_theta_max          30.559 
_diffrn_reflns_theta_full         25.000 
_diffrn_measured_fraction_theta_max   0.931 
_diffrn_measured_fraction_theta_full  0.943 
_diffrn_reflns_Laue_measured_fraction_max    0.931 
_diffrn_reflns_Laue_measured_fraction_full   0.943 
_diffrn_reflns_point_group_measured_fraction_max   0.931 
_diffrn_reflns_point_group_measured_fraction_full  0.943 
_reflns_number_total              17550 
_reflns_number_gt                 16078 
_reflns_threshold_expression      'I > 2\s(I)' 
_reflns_Friedel_coverage          0.000 
_reflns_Friedel_fraction_max      . 
_reflns_Friedel_fraction_full     . 
  
_reflns_special_details 
; 
 _reflns_Friedel_fraction is defined as the number of unique 
 Friedel pairs measured divided by the number that would be 
 possible theoretically, ignoring centric projections and 
 systematic absences. These statistics refer to single and 
 composite reflections containing twin component 1 only. 
; 
  
_computing_data_collection        'APEX2 v2011.4.0 (Bruker-AXS, 2011)' 
_computing_cell_refinement        'SAINT 7.46A (Bruker-AXS, 2011)' 
_computing_data_reduction         'SAINT 7.46A (Bruker-AXS, 2011)' 
_computing_structure_solution     'SHELXS-97 (Sheldrick, 2008)' 
_computing_structure_refinement   'SHELXL-2012 (Sheldrick, 2012)' 
_computing_molecular_graphics     'Bruker SHELXTL' 
_computing_publication_material   'Bruker SHELXTL' 
  
_refine_special_details 
; 
 Refined as a 2-component twin. 
; 
_refine_ls_structure_factor_coef  Fsqd 
_refine_ls_matrix_type            full 
_refine_ls_weighting_scheme       calc 
_refine_ls_weighting_details 
; 
 w=1/[\s^2^(Fo^2^)+(0.0342P)^2^+1.9724P] 
 where P=(Fo^2^+2Fc^2^)/3 
; 
_atom_sites_solution_primary      direct 
_atom_sites_solution_secondary    difmap 
_atom_sites_solution_hydrogens    geom 
_refine_ls_hydrogen_treatment     constr 
_refine_ls_extinction_method      none 
_refine_ls_extinction_coef        . 
_refine_ls_number_reflns          17550 
_refine_ls_number_parameters      452 
_refine_ls_number_restraints      750 
_refine_ls_R_factor_all           0.0431 
_refine_ls_R_factor_gt            0.0374 
_refine_ls_wR_factor_ref          0.0969 
_refine_ls_wR_factor_gt           0.0940 
_refine_ls_goodness_of_fit_ref    1.128 
_refine_ls_restrained_S_all       1.108 
_refine_ls_shift/su_max           0.001 
_refine_ls_shift/su_mean          0.000 
  
loop_ 
 _atom_site_label 
 _atom_site_type_symbol 
 _atom_site_fract_x 
 _atom_site_fract_y 
 _atom_site_fract_z 
 _atom_site_U_iso_or_equiv 
 _atom_site_adp_type 
 _atom_site_occupancy 
 _atom_site_site_symmetry_order 
 _atom_site_calc_flag 
 _atom_site_refinement_flags_posn 
 _atom_site_refinement_flags_adp 
 _atom_site_refinement_flags_occupancy 
 _atom_site_disorder_assembly 
 _atom_site_disorder_group 
V1 V 0.17499(4) 0.23183(2) 0.70625(3) 0.01264(7) Uani 1 1 d . U . . . 
O1 O 0.04894(16) 0.31853(10) 0.65808(11) 0.0184(3) Uani 1 1 d . U . . . 
Si1 Si 0.01514(7) 0.19739(4) 0.55958(4) 0.01796(12) Uani 1 1 d . U . . . 
Si2 Si -0.01898(7) 0.22924(4) 0.86991(5) 0.01872(13) Uani 1 1 d . U . . . 
Si3 Si 0.30142(7) 0.41351(4) 0.63846(5) 0.01854(12) Uani 1 1 d . U . . . 
N1 N 0.15200(19) 0.16005(12) 0.64263(13) 0.0158(3) Uani 1 1 d . U . . . 
N2 N 0.1239(2) 0.18515(13) 0.82504(13) 0.0172(4) Uani 1 1 d . U . . . 
N3 N 0.32908(18) 0.29335(12) 0.68359(14) 0.0164(3) Uani 1 1 d . U . . . 
N11 N 0.35930(19) 0.11104(12) 0.77006(13) 0.0150(3) Uani 1 1 d . U . . . 
C11 C 0.3280(2) 0.03660(14) 0.74811(16) 0.0184(4) Uani 1 1 d . U . . . 
H11A H 0.2637 0.0035 0.7898 0.022 Uiso 1 1 calc R U . . . 
H11B H 0.4159 -0.0074 0.7526 0.022 Uiso 1 1 calc R U . . . 
C12 C 0.2594(2) 0.07910(15) 0.65443(16) 0.0192(4) Uani 1 1 d . U . . . 
H12A H 0.3315 0.0968 0.6119 0.023 Uiso 1 1 calc R U . . . 
H12B H 0.2154 0.0341 0.6431 0.023 Uiso 1 1 calc R U . . . 
C13 C 0.3621(2) 0.08963(16) 0.86476(16) 0.0209(4) Uani 1 1 d . U . . . 
H13A H 0.4107 0.1317 0.8780 0.025 Uiso 1 1 calc R U . . . 
H13B H 0.4140 0.0263 0.8988 0.025 Uiso 1 1 calc R U . . . 
C14 C 0.2121(3) 0.09984(16) 0.89073(16) 0.0226(5) Uani 1 1 d . U . . . 
H14A H 0.1730 0.0466 0.8941 0.027 Uiso 1 1 calc R U . . . 
H14B H 0.2110 0.1015 0.9498 0.027 Uiso 1 1 calc R U . . . 
C15 C 0.4845(2) 0.14384(15) 0.72974(17) 0.0204(5) Uani 1 1 d . U . . . 
H15A H 0.4915 0.1402 0.6717 0.025 Uiso 1 1 calc R U . . . 
H15B H 0.5704 0.1053 0.7681 0.025 Uiso 1 1 calc R U . . . 
C16 C 0.4721(2) 0.24253(15) 0.71820(18) 0.0216(5) Uani 1 1 d . U . . . 
H16A H 0.4944 0.2441 0.7758 0.026 Uiso 1 1 calc R U . . . 
H16B H 0.5402 0.2712 0.6769 0.026 Uiso 1 1 calc R U . . . 
C21 C 0.0148(3) 0.1087(2) 0.5147(2) 0.0318(6) Uani 1 1 d . U . . . 
H21A H 0.1056 0.0969 0.4913 0.048 Uiso 1 1 calc R U . . . 
H21B H -0.0606 0.1307 0.4673 0.048 Uiso 1 1 calc R U . . . 
H21C H -0.0008 0.0520 0.5620 0.048 Uiso 1 1 calc R U . . . 
C22 C 0.0368(3) 0.30367(19) 0.46543(18) 0.0301(6) Uani 1 1 d . U . . . 
H22A H 0.0285 0.3536 0.4850 0.045 Uiso 1 1 calc R U . . . 
H22B H -0.0364 0.3196 0.4179 0.045 Uiso 1 1 calc R U . . . 
H22C H 0.1297 0.2940 0.4436 0.045 Uiso 1 1 calc R U . . . 
C23 C -0.1592(3) 0.21818(19) 0.60272(18) 0.0267(5) Uani 1 1 d . U . . . 
H23A H -0.1661 0.1655 0.6574 0.040 Uiso 1 1 calc R U . . . 
H23B H -0.2342 0.2269 0.5587 0.040 Uiso 1 1 calc R U . . . 
H23C H -0.1690 0.2731 0.6147 0.040 Uiso 1 1 calc R U . . . 
C24 C -0.1661(3) 0.3078(2) 0.7877(2) 0.0329(6) Uani 1 1 d . U . . . 
H24A H -0.1319 0.3604 0.7453 0.049 Uiso 1 1 calc R U . . . 
H24B H -0.2417 0.3290 0.8183 0.049 Uiso 1 1 calc R U . . . 
H24C H -0.2022 0.2753 0.7564 0.049 Uiso 1 1 calc R U . . . 
C25 C -0.0934(3) 0.13204(19) 0.9511(2) 0.0337(6) Uani 1 1 d . U . . . 
H25A H -0.1213 0.0959 0.9212 0.051 Uiso 1 1 calc R U . . . 
H25B H -0.1757 0.1566 0.9747 0.051 Uiso 1 1 calc R U . . . 
H25C H -0.0218 0.0931 0.9995 0.051 Uiso 1 1 calc R U . . . 
C26 C 0.0399(3) 0.29319(16) 0.93107(17) 0.0216(5) Uani 1 1 d . U . . . 
H26A H 0.1206 0.2545 0.9729 0.032 Uiso 1 1 calc R U . . . 
H26B H -0.0373 0.3097 0.9633 0.032 Uiso 1 1 calc R U . . . 
H26C H 0.0674 0.3488 0.8890 0.032 Uiso 1 1 calc R U . . . 
C27 C 0.2179(3) 0.46637(17) 0.52362(19) 0.0286(5) Uani 1 1 d . U . . . 
H27A H 0.2746 0.4409 0.4871 0.043 Uiso 1 1 calc R U . . . 
H27B H 0.2120 0.5326 0.4995 0.043 Uiso 1 1 calc R U . . . 
H27C H 0.1231 0.4534 0.5238 0.043 Uiso 1 1 calc R U . . . 
C28 C 0.1899(3) 0.45854(17) 0.7091(2) 0.0273(5) Uani 1 1 d . U . . . 
H28A H 0.0942 0.4484 0.7049 0.041 Uiso 1 1 calc R U . . . 
H28B H 0.1875 0.5242 0.6890 0.041 Uiso 1 1 calc R U . . . 
H28C H 0.2296 0.4267 0.7706 0.041 Uiso 1 1 calc R U . . . 
C29 C 0.4747(3) 0.44957(17) 0.6356(2) 0.0292(6) Uani 1 1 d . U . . . 
H29A H 0.5211 0.4229 0.6955 0.044 Uiso 1 1 calc R U . . . 
H29B H 0.4592 0.5164 0.6124 0.044 Uiso 1 1 calc R U . . . 
H29C H 0.5344 0.4283 0.5974 0.044 Uiso 1 1 calc R U . . . 
V2 V 0.67992(4) 0.72928(2) 0.80948(3) 0.01247(7) Uani 1 1 d . U . . . 
O2 O 0.56195(16) 0.81815(10) 0.79714(11) 0.0187(3) Uani 1 1 d . U . . . 
Si4 Si 0.50991(7) 0.67632(4) 0.98261(4) 0.01768(12) Uani 1 1 d . U . . . 
Si5 Si 0.83527(7) 0.89731(4) 0.76571(4) 0.01758(12) Uani 1 1 d . U . . . 
N4 N 0.65333(18) 0.64961(12) 0.92758(12) 0.0146(3) Uani 1 1 d . U . . . 
N5 N 0.84392(18) 0.78096(12) 0.79070(13) 0.0153(3) Uani 1 1 d . U . . . 
N6 N 0.6211(2) 0.69649(12) 0.71958(13) 0.0165(4) Uani 1 1 d . U . . . 
N22 N 0.85390(19) 0.60175(12) 0.83295(12) 0.0144(3) Uani 1 1 d . U . . . 
C31 C 0.8266(2) 0.52825(14) 0.91460(15) 0.0162(4) Uani 1 1 d . U . . . 
H31A H 0.9153 0.4840 0.9427 0.019 Uiso 1 1 calc R U . . . 
H31B H 0.7596 0.4953 0.9014 0.019 Uiso 1 1 calc R U . . . 
C32 C 0.7650(2) 0.57094(15) 0.97632(15) 0.0182(4) Uani 1 1 d . U . . . 
H32A H 0.7266 0.5254 1.0261 0.022 Uiso 1 1 calc R U . . . 
H32B H 0.8396 0.5906 1.0008 0.022 Uiso 1 1 calc R U . . . 
C33 C 0.9886(2) 0.62824(14) 0.84034(17) 0.0200(4) Uani 1 1 d . U . . . 
H33A H 1.0652 0.5899 0.8241 0.024 Uiso 1 1 calc R U . . . 
H33B H 1.0109 0.6195 0.9018 0.024 Uiso 1 1 calc R U . . . 
C34 C 0.9754(2) 0.72810(15) 0.77829(17) 0.0203(5) Uani 1 1 d . U . . . 
H34A H 1.0565 0.7515 0.7908 0.024 Uiso 1 1 calc R U . . . 
H34B H 0.9754 0.7345 0.7164 0.024 Uiso 1 1 calc R U . . . 
C35 C 0.8389(3) 0.58039(16) 0.75555(16) 0.0200(4) Uani 1 1 d . U . . . 
H35A H 0.8764 0.5146 0.7716 0.024 Uiso 1 1 calc R U . . . 
H35B H 0.8926 0.6163 0.7078 0.024 Uiso 1 1 calc R U . . . 
C36 C 0.6850(2) 0.60391(15) 0.72453(16) 0.0199(4) Uani 1 1 d . U . . . 
H36A H 0.6743 0.6029 0.6656 0.024 Uiso 1 1 calc R U . . . 
H36B H 0.6358 0.5579 0.7660 0.024 Uiso 1 1 calc R U . . . 
C41 C 0.5215(3) 0.7739(2) 1.0122(2) 0.0332(6) Uani 1 1 d . U . . . 
H41A H 0.6125 0.7619 1.0447 0.050 Uiso 1 1 calc R U . . . 
H41B H 0.4455 0.7811 1.0493 0.050 Uiso 1 1 calc R U . . . 
H41C H 0.5125 0.8301 0.9583 0.050 Uiso 1 1 calc R U . . . 
C42 C 0.5044(3) 0.57497(19) 1.08875(17) 0.0275(5) Uani 1 1 d . U . . . 
H42A H 0.4939 0.5227 1.0758 0.041 Uiso 1 1 calc R U . . . 
H42B H 0.4244 0.5898 1.1200 0.041 Uiso 1 1 calc R U . . . 
H42C H 0.5920 0.5595 1.1258 0.041 Uiso 1 1 calc R U . . . 
C43 C 0.3411(2) 0.70222(19) 0.9147(2) 0.0284(5) Uani 1 1 d . U . . . 
H43A H 0.3385 0.7571 0.8602 0.043 Uiso 1 1 calc R U . . . 
H43B H 0.2617 0.7128 0.9483 0.043 Uiso 1 1 calc R U . . . 
H43C H 0.3344 0.6504 0.9000 0.043 Uiso 1 1 calc R U . . . 
C44 C 0.7593(3) 0.92721(17) 0.85586(18) 0.0281(5) Uani 1 1 d . U . . . 
H44A H 0.6595 0.9236 0.8572 0.042 Uiso 1 1 calc R U . . . 
H44B H 0.7688 0.9895 0.8452 0.042 Uiso 1 1 calc R U . . . 
H44C H 0.8096 0.8843 0.9126 0.042 Uiso 1 1 calc R U . . . 
C45 C 0.7303(3) 0.97211(16) 0.65871(16) 0.0225(5) Uani 1 1 d . U . . . 
H45A H 0.7655 0.9525 0.6126 0.034 Uiso 1 1 calc R U . . . 
H45B H 0.7390 1.0356 0.6425 0.034 Uiso 1 1 calc R U . . . 
H45C H 0.6311 0.9674 0.6649 0.034 Uiso 1 1 calc R U . . . 
C46 C 1.0177(3) 0.92137(18) 0.7579(2) 0.0356(7) Uani 1 1 d . U . . . 
H46A H 1.0734 0.8834 0.8142 0.053 Uiso 1 1 calc R U . . . 
H46B H 1.0131 0.9861 0.7449 0.053 Uiso 1 1 calc R U . . . 
H46C H 1.0618 0.9072 0.7107 0.053 Uiso 1 1 calc R U . . . 
Si6 Si 0.47586(7) 0.75044(4) 0.64118(5) 0.01979(13) Uani 1 1 d . U . . . 
C48 C 0.5279(3) 0.7503(3) 0.53236(19) 0.0455(9) Uani 1 1 d . U . . . 
H48A H 0.6145 0.7743 0.5178 0.068 Uiso 1 1 calc R U . . . 
H48B H 0.4525 0.7890 0.4863 0.068 Uiso 1 1 calc R U . . . 
H48C H 0.5438 0.6877 0.5361 0.068 Uiso 1 1 calc R U . . . 
C49 C 0.3329(3) 0.6839(2) 0.6765(2) 0.0334(6) Uani 1 1 d . U . . . 
H49A H 0.3704 0.6196 0.6886 0.050 Uiso 1 1 calc R U . . . 
H49B H 0.2566 0.7087 0.6293 0.050 Uiso 1 1 calc R U . . . 
H49C H 0.2967 0.6883 0.7300 0.050 Uiso 1 1 calc R U . . . 
C47 C 0.4036(4) 0.8698(2) 0.6250(3) 0.0615(13) Uani 1 1 d . U . . . 
H47A H 0.3800 0.8714 0.6819 0.092 Uiso 1 1 calc R U . . . 
H47B H 0.3187 0.8938 0.5842 0.092 Uiso 1 1 calc R U . . . 
H47C H 0.4739 0.9075 0.6004 0.092 Uiso 1 1 calc R U . . . 
  
loop_ 
 _atom_site_aniso_label 
 _atom_site_aniso_U_11 
 _atom_site_aniso_U_22 
 _atom_site_aniso_U_33 
 _atom_site_aniso_U_23 
 _atom_site_aniso_U_13 
 _atom_site_aniso_U_12 
V1 0.00947(15) 0.01260(14) 0.01506(17) -0.00631(13) 0.00004(13) 0.00127(11) 
O1 0.0133(7) 0.0165(7) 0.0232(9) -0.0070(6) 0.0000(6) -0.0001(6) 
Si1 0.0154(3) 0.0235(3) 0.0157(3) -0.0097(2) -0.0012(2) -0.0019(2) 
Si2 0.0147(3) 0.0227(3) 0.0221(3) -0.0136(2) 0.0049(2) -0.0013(2) 
Si3 0.0140(3) 0.0151(3) 0.0255(3) -0.0075(2) 0.0034(2) -0.0019(2) 
N1 0.0140(8) 0.0170(8) 0.0160(9) -0.0081(7) -0.0008(7) 0.0014(6) 
N2 0.0162(9) 0.0187(8) 0.0165(9) -0.0086(7) 0.0018(7) 0.0005(7) 
N3 0.0087(8) 0.0146(7) 0.0236(10) -0.0068(7) 0.0000(7) 0.0005(6) 
N11 0.0124(8) 0.0162(8) 0.0163(9) -0.0080(6) 0.0006(6) 0.0006(6) 
C11 0.0176(10) 0.0147(9) 0.0220(11) -0.0086(8) 0.0004(8) 0.0011(8) 
C12 0.0179(10) 0.0202(10) 0.0210(12) -0.0121(8) -0.0003(8) 0.0010(8) 
C13 0.0192(11) 0.0210(10) 0.0181(11) -0.0072(8) -0.0039(8) 0.0049(8) 
C14 0.0230(12) 0.0224(10) 0.0171(11) -0.0064(8) 0.0023(9) 0.0044(9) 
C15 0.0124(10) 0.0200(10) 0.0269(13) -0.0096(9) 0.0006(8) 0.0017(7) 
C16 0.0110(10) 0.0212(10) 0.0305(13) -0.0101(9) -0.0022(8) 0.0006(8) 
C21 0.0335(15) 0.0378(14) 0.0311(15) -0.0232(12) -0.0035(11) -0.0024(11) 
C22 0.0274(13) 0.0350(13) 0.0195(13) -0.0021(10) -0.0068(10) -0.0072(11) 
C23 0.0162(11) 0.0409(14) 0.0279(14) -0.0185(11) 0.0022(9) -0.0067(10) 
C24 0.0160(12) 0.0492(16) 0.0345(16) -0.0241(13) -0.0006(10) 0.0074(11) 
C25 0.0323(15) 0.0331(14) 0.0440(18) -0.0219(12) 0.0195(13) -0.0121(11) 
C26 0.0226(11) 0.0237(11) 0.0203(12) -0.0129(9) 0.0025(9) 0.0004(9) 
C27 0.0247(12) 0.0225(11) 0.0301(14) -0.0029(10) 0.0004(10) -0.0028(9) 
C28 0.0249(13) 0.0232(11) 0.0379(15) -0.0171(10) 0.0097(11) -0.0037(9) 
C29 0.0216(12) 0.0244(11) 0.0433(17) -0.0135(11) 0.0070(11) -0.0093(9) 
V2 0.00829(15) 0.01213(14) 0.01524(17) -0.00515(12) -0.00024(13) 0.00113(11) 
O2 0.0125(7) 0.0168(7) 0.0245(9) -0.0080(6) -0.0011(6) 0.0016(6) 
Si4 0.0127(3) 0.0236(3) 0.0205(3) -0.0130(2) 0.0050(2) -0.0031(2) 
Si5 0.0158(3) 0.0143(3) 0.0198(3) -0.0044(2) -0.0020(2) -0.0021(2) 
N4 0.0108(8) 0.0160(8) 0.0145(9) -0.0054(6) 0.0008(6) 0.0013(6) 
N5 0.0092(8) 0.0151(7) 0.0188(9) -0.0052(7) 0.0004(7) 0.0000(6) 
N6 0.0139(9) 0.0149(8) 0.0183(9) -0.0057(7) -0.0043(7) 0.0006(6) 
N22 0.0111(8) 0.0149(8) 0.0146(8) -0.0051(6) 0.0001(6) 0.0010(6) 
C31 0.0153(10) 0.0148(9) 0.0144(10) -0.0042(7) -0.0008(7) 0.0025(7) 
C32 0.0146(10) 0.0207(9) 0.0148(10) -0.0047(8) -0.0002(8) 0.0012(7) 
C33 0.0098(9) 0.0178(9) 0.0276(12) -0.0068(8) -0.0019(8) 0.0031(7) 
C34 0.0124(10) 0.0182(10) 0.0273(12) -0.0068(8) 0.0047(8) -0.0013(8) 
C35 0.0206(11) 0.0198(10) 0.0186(11) -0.0094(8) 0.0013(8) 0.0020(8) 
C36 0.0220(11) 0.0181(10) 0.0192(11) -0.0098(8) -0.0041(8) 0.0024(8) 
C41 0.0281(14) 0.0403(15) 0.0483(19) -0.0335(13) 0.0175(12) -0.0118(11) 
C42 0.0244(13) 0.0374(14) 0.0218(13) -0.0121(10) 0.0095(9) -0.0088(10) 
C43 0.0125(10) 0.0409(14) 0.0324(14) -0.0167(12) 0.0027(10) -0.0026(9) 
C44 0.0405(16) 0.0200(11) 0.0222(13) -0.0098(9) -0.0082(10) 0.0003(10) 
C45 0.0236(12) 0.0202(10) 0.0192(11) -0.0052(8) -0.0008(9) -0.0003(9) 
C46 0.0211(12) 0.0208(11) 0.057(2) -0.0071(12) -0.0030(12) -0.0068(9) 
Si6 0.0156(3) 0.0189(3) 0.0217(3) -0.0066(2) -0.0071(2) 0.0001(2) 
C48 0.0217(14) 0.081(2) 0.0181(13) -0.0065(14) -0.0024(10) -0.0050(15) 
C49 0.0194(12) 0.0481(16) 0.0336(16) -0.0169(13) -0.0027(11) -0.0085(11) 
C47 0.064(2) 0.0276(14) 0.082(3) -0.0224(16) -0.059(2) 0.0168(14) 
  
_geom_special_details 
; 
 All esds (except the esd in the dihedral angle between two l.s. planes) 
 are estimated using the full covariance matrix.  The cell esds are taken 
 into account individually in the estimation of esds in distances, angles 
 and torsion angles; correlations between esds in cell parameters are only 
 used when they are defined by crystal symmetry.  An approximate (isotropic) 
 treatment of cell esds is used for estimating esds involving l.s. planes. 
; 
  
loop_ 
 _geom_bond_atom_site_label_1 
 _geom_bond_atom_site_label_2 
 _geom_bond_distance 
 _geom_bond_site_symmetry_2 
 _geom_bond_publ_flag 
V1 O1 1.6102(16) . ? 
V1 N1 1.9020(19) . ? 
V1 N3 1.9034(18) . ? 
V1 N2 1.908(2) . ? 
V1 N11 2.2877(18) . ? 
Si1 N1 1.750(2) . ? 
Si1 C22 1.856(3) . ? 
Si1 C23 1.863(3) . ? 
Si1 C21 1.873(3) . ? 
Si2 N2 1.748(2) . ? 
Si2 C24 1.862(3) . ? 
Si2 C26 1.873(2) . ? 
Si2 C25 1.883(3) . ? 
Si3 N3 1.7603(18) . ? 
Si3 C27 1.859(3) . ? 
Si3 C28 1.866(3) . ? 
Si3 C29 1.873(3) . ? 
N1 C12 1.468(3) . ? 
N2 C14 1.484(3) . ? 
N3 C16 1.463(3) . ? 
N11 C13 1.465(3) . ? 
N11 C15 1.469(3) . ? 
N11 C11 1.478(3) . ? 
C11 C12 1.518(3) . ? 
C13 C14 1.516(3) . ? 
C15 C16 1.523(3) . ? 
V2 O2 1.6140(16) . ? 
V2 N6 1.893(2) . ? 
V2 N5 1.9010(18) . ? 
V2 N4 1.9155(19) . ? 
V2 N22 2.3211(18) . ? 
Si4 N4 1.7474(19) . ? 
Si4 C41 1.864(3) . ? 
Si4 C43 1.869(3) . ? 
Si4 C42 1.878(3) . ? 
Si5 N5 1.7564(18) . ? 
Si5 C44 1.862(3) . ? 
Si5 C45 1.867(2) . ? 
Si5 C46 1.874(3) . ? 
N4 C32 1.460(3) . ? 
N5 C34 1.467(3) . ? 
N6 C36 1.492(3) . ? 
N6 Si6 1.755(2) . ? 
N22 C31 1.467(3) . ? 
N22 C33 1.468(3) . ? 
N22 C35 1.472(3) . ? 
C31 C32 1.519(3) . ? 
C33 C34 1.518(3) . ? 
C35 C36 1.507(3) . ? 
Si6 C47 1.853(3) . ? 
Si6 C49 1.865(3) . ? 
Si6 C48 1.874(3) . ? 
  
loop_ 
 _geom_angle_atom_site_label_1 
 _geom_angle_atom_site_label_2 
 _geom_angle_atom_site_label_3 
 _geom_angle 
 _geom_angle_site_symmetry_1 
 _geom_angle_site_symmetry_3 
 _geom_angle_publ_flag 
O1 V1 N1 100.46(8) . . ? 
O1 V1 N3 99.07(8) . . ? 
N1 V1 N3 118.32(9) . . ? 
O1 V1 N2 102.04(8) . . ? 
N1 V1 N2 115.19(8) . . ? 
N3 V1 N2 116.73(9) . . ? 
O1 V1 N11 177.72(8) . . ? 
N1 V1 N11 79.12(7) . . ? 
N3 V1 N11 79.24(7) . . ? 
N2 V1 N11 80.13(7) . . ? 
N1 Si1 C22 111.53(11) . . ? 
N1 Si1 C23 111.27(11) . . ? 
C22 Si1 C23 108.93(13) . . ? 
N1 Si1 C21 109.93(11) . . ? 
C22 Si1 C21 106.90(14) . . ? 
C23 Si1 C21 108.13(13) . . ? 
N2 Si2 C24 114.73(11) . . ? 
N2 Si2 C26 110.14(10) . . ? 
C24 Si2 C26 107.55(12) . . ? 
N2 Si2 C25 109.21(11) . . ? 
C24 Si2 C25 107.11(15) . . ? 
C26 Si2 C25 107.87(13) . . ? 
N3 Si3 C27 112.32(11) . . ? 
N3 Si3 C28 110.09(11) . . ? 
C27 Si3 C28 109.52(13) . . ? 
N3 Si3 C29 109.36(10) . . ? 
C27 Si3 C29 107.60(13) . . ? 
C28 Si3 C29 107.81(13) . . ? 
C12 N1 Si1 118.93(15) . . ? 
C12 N1 V1 120.15(14) . . ? 
Si1 N1 V1 120.43(10) . . ? 
C14 N2 Si2 112.93(15) . . ? 
C14 N2 V1 118.61(15) . . ? 
Si2 N2 V1 128.45(11) . . ? 
C16 N3 Si3 117.47(14) . . ? 
C16 N3 V1 120.45(14) . . ? 
Si3 N3 V1 121.12(10) . . ? 
C13 N11 C15 113.17(19) . . ? 
C13 N11 C11 113.32(18) . . ? 
C15 N11 C11 112.34(18) . . ? 
C13 N11 V1 105.34(13) . . ? 
C15 N11 V1 105.61(13) . . ? 
C11 N11 V1 106.23(13) . . ? 
N11 C11 C12 107.95(17) . . ? 
N1 C12 C11 109.46(18) . . ? 
N11 C13 C14 108.79(19) . . ? 
N2 C14 C13 110.26(19) . . ? 
N11 C15 C16 108.60(18) . . ? 
N3 C16 C15 109.65(18) . . ? 
O2 V2 N6 102.81(8) . . ? 
O2 V2 N5 100.16(8) . . ? 
N6 V2 N5 115.91(9) . . ? 
O2 V2 N4 100.04(8) . . ? 
N6 V2 N4 115.53(8) . . ? 
N5 V2 N4 117.91(8) . . ? 
O2 V2 N22 177.39(8) . . ? 
N6 V2 N22 79.79(7) . . ? 
N5 V2 N22 78.77(7) . . ? 
N4 V2 N22 78.48(7) . . ? 
N4 Si4 C41 112.72(11) . . ? 
N4 Si4 C43 110.68(11) . . ? 
C41 Si4 C43 109.58(14) . . ? 
N4 Si4 C42 109.19(11) . . ? 
C41 Si4 C42 106.92(14) . . ? 
C43 Si4 C42 107.55(12) . . ? 
N5 Si5 C44 110.77(11) . . ? 
N5 Si5 C45 111.62(11) . . ? 
C44 Si5 C45 109.83(12) . . ? 
N5 Si5 C46 109.37(11) . . ? 
C44 Si5 C46 106.47(14) . . ? 
C45 Si5 C46 108.63(13) . . ? 
C32 N4 Si4 119.16(15) . . ? 
C32 N4 V2 118.72(14) . . ? 
Si4 N4 V2 121.64(10) . . ? 
C34 N5 Si5 118.11(14) . . ? 
C34 N5 V2 118.97(14) . . ? 
Si5 N5 V2 121.67(10) . . ? 
C36 N6 Si6 112.51(15) . . ? 
C36 N6 V2 117.67(14) . . ? 
Si6 N6 V2 128.58(11) . . ? 
C31 N22 C33 112.57(17) . . ? 
C31 N22 C35 111.93(17) . . ? 
C33 N22 C35 112.64(19) . . ? 
C31 N22 V2 106.83(13) . . ? 
C33 N22 V2 106.31(12) . . ? 
C35 N22 V2 106.00(13) . . ? 
N22 C31 C32 108.13(17) . . ? 
N4 C32 C31 109.34(18) . . ? 
N22 C33 C34 108.00(18) . . ? 
N5 C34 C33 109.22(18) . . ? 
N22 C35 C36 108.48(19) . . ? 
N6 C36 C35 109.94(19) . . ? 
N6 Si6 C47 114.02(12) . . ? 
N6 Si6 C49 109.03(11) . . ? 
C47 Si6 C49 108.14(18) . . ? 
N6 Si6 C48 109.19(12) . . ? 
C47 Si6 C48 108.5(2) . . ? 
C49 Si6 C48 107.78(15) . . ? 
  
_refine_diff_density_max    0.504 
_refine_diff_density_min   -0.513 
_refine_diff_density_rms    0.070 
  
_shelxl_version_number 2012-9 
  
_shelx_res_file 
; 
TITL x13085_t4 in P-1 
CELL 0.71073   9.6971  16.2957  16.5852  66.341  89.977  79.480 
ZERR    4.00   0.0006   0.0010   0.0010   0.001   0.002   0.002 
LATT  1 
SFAC C H N O SI V 
UNIT 60 156 16 4 12 4 
TEMP -173 
SIZE 0.10 0.10 0.20 
  
WPDB -2 
ACTA 50 
  
OMIT    -5   1   7     ! outlier 
OMIT    -2   9   8     ! outlier 
OMIT    -4   1   7     ! outlier 
OMIT     2  -3   8     ! outlier 
OMIT    -3   1   7     ! outlier 
REM  OMIT    -2   6   3     ! outlier 
OMIT    -2   1   7     ! outlier 
REM  OMIT     2  -4   3     ! outlier 
REM  OMIT    -1   1   7     ! outlier 
REM  OMIT     1   1   7     ! outlier 
REM  OMIT     2   1   7     ! outlier 
  
L.S. 10 
BOND 
FMAP 2 
PLAN 20 
  
simu 
rigu 
  
WGHT    0.034200    1.972400 
BASF   0.50090 
FVAR       0.46696 
V1    6    0.174988    0.231831    0.706253    11.00000    0.00947    0.01260 = 
         0.01506   -0.00631    0.00004    0.00127 
O1    4    0.048936    0.318532    0.658080    11.00000    0.01329    0.01651 = 
         0.02316   -0.00704   -0.00004   -0.00008 
SI1   5    0.015138    0.197393    0.559580    11.00000    0.01538    0.02354 = 
         0.01574   -0.00966   -0.00118   -0.00188 
SI2   5   -0.018976    0.229244    0.869911    11.00000    0.01468    0.02267 = 
         0.02214   -0.01356    0.00493   -0.00133 
SI3   5    0.301423    0.413510    0.638464    11.00000    0.01396    0.01505 = 
         0.02546   -0.00749    0.00345   -0.00195 
N1    3    0.151996    0.160051    0.642628    11.00000    0.01398    0.01695 = 
         0.01597   -0.00814   -0.00080    0.00135 
N2    3    0.123879    0.185153    0.825043    11.00000    0.01615    0.01867 = 
         0.01646   -0.00858    0.00178    0.00046 
N3    3    0.329083    0.293345    0.683589    11.00000    0.00875    0.01457 = 
         0.02364   -0.00677   -0.00003    0.00053 
N11   3    0.359297    0.111041    0.770056    11.00000    0.01244    0.01619 = 
         0.01629   -0.00803    0.00057    0.00064 
C11   1    0.327966    0.036597    0.748112    11.00000    0.01758    0.01472 = 
         0.02205   -0.00857    0.00035    0.00112 
AFIX  23 
H11A  2    0.263688    0.003481    0.789755    11.00000   -1.20000 
H11B  2    0.415852   -0.007401    0.752589    11.00000   -1.20000 
AFIX   0 
C12   1    0.259367    0.079099    0.654427    11.00000    0.01794    0.02019 = 
         0.02104   -0.01213   -0.00031    0.00096 
AFIX  23 
H12A  2    0.331456    0.096802    0.611861    11.00000   -1.20000 
H12B  2    0.215390    0.034101    0.643072    11.00000   -1.20000 
AFIX   0 
C13   1    0.362136    0.089628    0.864761    11.00000    0.01924    0.02095 = 
         0.01805   -0.00721   -0.00392    0.00488 
AFIX  23 
H13A  2    0.410739    0.131715    0.878024    11.00000   -1.20000 
H13B  2    0.413992    0.026284    0.898808    11.00000   -1.20000 
AFIX   0 
C14   1    0.212077    0.099837    0.890734    11.00000    0.02296    0.02241 = 
         0.01710   -0.00639    0.00230    0.00437 
AFIX  23 
H14A  2    0.173008    0.046609    0.894100    11.00000   -1.20000 
H14B  2    0.210975    0.101482    0.949758    11.00000   -1.20000 
AFIX   0 
C15   1    0.484549    0.143844    0.729737    11.00000    0.01235    0.02002 = 
         0.02689   -0.00961    0.00064    0.00170 
AFIX  23 
H15A  2    0.491514    0.140208    0.671661    11.00000   -1.20000 
H15B  2    0.570353    0.105315    0.768077    11.00000   -1.20000 
AFIX   0 
C16   1    0.472127    0.242530    0.718201    11.00000    0.01103    0.02121 = 
         0.03052   -0.01009   -0.00219    0.00064 
AFIX  23 
H16A  2    0.494360    0.244098    0.775757    11.00000   -1.20000 
H16B  2    0.540225    0.271241    0.676859    11.00000   -1.20000 
AFIX   0 
C21   1    0.014765    0.108674    0.514713    11.00000    0.03351    0.03780 = 
         0.03112   -0.02320   -0.00349   -0.00241 
AFIX 137 
H21A  2    0.105592    0.096905    0.491347    11.00000   -1.50000 
H21B  2   -0.060647    0.130674    0.467287    11.00000   -1.50000 
H21C  2   -0.000845    0.052030    0.562034    11.00000   -1.50000 
AFIX   0 
C22   1    0.036800    0.303675    0.465429    11.00000    0.02740    0.03497 = 
         0.01953   -0.00206   -0.00679   -0.00717 
AFIX 137 
H22A  2    0.028496    0.353560    0.484994    11.00000   -1.50000 
H22B  2   -0.036351    0.319586    0.417928    11.00000   -1.50000 
H22C  2    0.129694    0.294002    0.443647    11.00000   -1.50000 
AFIX   0 
C23   1   -0.159193    0.218180    0.602720    11.00000    0.01622    0.04093 = 
         0.02785   -0.01855    0.00218   -0.00666 
AFIX 137 
H23A  2   -0.166099    0.165490    0.657414    11.00000   -1.50000 
H23B  2   -0.234170    0.226915    0.558732    11.00000   -1.50000 
H23C  2   -0.169038    0.273071    0.614713    11.00000   -1.50000 
AFIX   0 
C24   1   -0.166133    0.307805    0.787733    11.00000    0.01600    0.04923 = 
         0.03451   -0.02406   -0.00061    0.00743 
AFIX 137 
H24A  2   -0.131944    0.360434    0.745261    11.00000   -1.50000 
H24B  2   -0.241711    0.329018    0.818251    11.00000   -1.50000 
H24C  2   -0.202196    0.275313    0.756437    11.00000   -1.50000 
AFIX   0 
C25   1   -0.093356    0.132040    0.951057    11.00000    0.03230    0.03314 = 
         0.04403   -0.02192    0.01947   -0.01209 
AFIX 137 
H25A  2   -0.121345    0.095861    0.921154    11.00000   -1.50000 
H25B  2   -0.175661    0.156564    0.974748    11.00000   -1.50000 
H25C  2   -0.021771    0.093107    0.999499    11.00000   -1.50000 
AFIX   0 
C26   1    0.039926    0.293186    0.931066    11.00000    0.02262    0.02365 = 
         0.02034   -0.01293    0.00249    0.00039 
AFIX 137 
H26A  2    0.120586    0.254509    0.972935    11.00000   -1.50000 
H26B  2   -0.037347    0.309668    0.963279    11.00000   -1.50000 
H26C  2    0.067363    0.348844    0.888989    11.00000   -1.50000 
AFIX   0 
C27   1    0.217925    0.466372    0.523619    11.00000    0.02473    0.02253 = 
         0.03015   -0.00286    0.00041   -0.00278 
AFIX 137 
H27A  2    0.274642    0.440916    0.487064    11.00000   -1.50000 
H27B  2    0.212007    0.532649    0.499470    11.00000   -1.50000 
H27C  2    0.123107    0.453419    0.523776    11.00000   -1.50000 
AFIX   0 
C28   1    0.189939    0.458545    0.709143    11.00000    0.02486    0.02319 = 
         0.03786   -0.01712    0.00970   -0.00375 
AFIX 137 
H28A  2    0.094177    0.448358    0.704932    11.00000   -1.50000 
H28B  2    0.187460    0.524195    0.688974    11.00000   -1.50000 
H28C  2    0.229623    0.426735    0.770647    11.00000   -1.50000 
AFIX   0 
C29   1    0.474699    0.449571    0.635576    11.00000    0.02157    0.02442 = 
         0.04334   -0.01352    0.00698   -0.00931 
AFIX 137 
H29A  2    0.521119    0.422923    0.695458    11.00000   -1.50000 
H29B  2    0.459205    0.516392    0.612389    11.00000   -1.50000 
H29C  2    0.534426    0.428262    0.597370    11.00000   -1.50000 
AFIX   0 
V2    6    0.679915    0.729277    0.809480    11.00000    0.00829    0.01213 = 
         0.01524   -0.00515   -0.00024    0.00113 
O2    4    0.561946    0.818147    0.797137    11.00000    0.01247    0.01684 = 
         0.02446   -0.00804   -0.00108    0.00156 
SI4   5    0.509910    0.676322    0.982607    11.00000    0.01267    0.02356 = 
         0.02052   -0.01301    0.00502   -0.00309 
SI5   5    0.835273    0.897312    0.765706    11.00000    0.01581    0.01427 = 
         0.01981   -0.00444   -0.00200   -0.00205 
N4    3    0.653332    0.649612    0.927576    11.00000    0.01083    0.01602 = 
         0.01451   -0.00539    0.00076    0.00132 
N5    3    0.843919    0.780961    0.790697    11.00000    0.00923    0.01508 = 
         0.01877   -0.00522    0.00039    0.00003 
N6    3    0.621136    0.696491    0.719585    11.00000    0.01388    0.01488 = 
         0.01827   -0.00569   -0.00425    0.00058 
N22   3    0.853898    0.601754    0.832948    11.00000    0.01111    0.01491 = 
         0.01462   -0.00508    0.00012    0.00098 
C31   1    0.826626    0.528249    0.914603    11.00000    0.01532    0.01476 = 
         0.01442   -0.00417   -0.00077    0.00252 
AFIX  23 
H31A  2    0.915271    0.484009    0.942684    11.00000   -1.20000 
H31B  2    0.759637    0.495326    0.901351    11.00000   -1.20000 
AFIX   0 
C32   1    0.765041    0.570937    0.976322    11.00000    0.01460    0.02069 = 
         0.01477   -0.00465   -0.00023    0.00123 
AFIX  23 
H32A  2    0.726569    0.525392    1.026066    11.00000   -1.20000 
H32B  2    0.839586    0.590624    1.000821    11.00000   -1.20000 
AFIX   0 
C33   1    0.988570    0.628244    0.840341    11.00000    0.00983    0.01780 = 
         0.02761   -0.00681   -0.00186    0.00314 
AFIX  23 
H33A  2    1.065168    0.589932    0.824067    11.00000   -1.20000 
H33B  2    1.010866    0.619527    0.901845    11.00000   -1.20000 
AFIX   0 
C34   1    0.975406    0.728103    0.778285    11.00000    0.01238    0.01817 = 
         0.02732   -0.00681    0.00469   -0.00129 
AFIX  23 
H34A  2    1.056466    0.751546    0.790783    11.00000   -1.20000 
H34B  2    0.975449    0.734460    0.716362    11.00000   -1.20000 
AFIX   0 
C35   1    0.838934    0.580387    0.755548    11.00000    0.02056    0.01976 = 
         0.01856   -0.00936    0.00131    0.00198 
AFIX  23 
H35A  2    0.876382    0.514626    0.771607    11.00000   -1.20000 
H35B  2    0.892623    0.616292    0.707770    11.00000   -1.20000 
AFIX   0 
C36   1    0.685034    0.603909    0.724529    11.00000    0.02200    0.01811 = 
         0.01920   -0.00980   -0.00409    0.00240 
AFIX  23 
H36A  2    0.674323    0.602937    0.665578    11.00000   -1.20000 
H36B  2    0.635789    0.557897    0.766017    11.00000   -1.20000 
AFIX   0 
C41   1    0.521462    0.773917    1.012231    11.00000    0.02807    0.04034 = 
         0.04835   -0.03349    0.01751   -0.01181 
AFIX 137 
H41A  2    0.612515    0.761876    1.044700    11.00000   -1.50000 
H41B  2    0.445492    0.781074    1.049314    11.00000   -1.50000 
H41C  2    0.512452    0.830104    0.958253    11.00000   -1.50000 
AFIX   0 
C42   1    0.504401    0.574968    1.088746    11.00000    0.02442    0.03744 = 
         0.02176   -0.01206    0.00952   -0.00876 
AFIX 137 
H42A  2    0.493919    0.522701    1.075793    11.00000   -1.50000 
H42B  2    0.424439    0.589777    1.120025    11.00000   -1.50000 
H42C  2    0.591970    0.559546    1.125797    11.00000   -1.50000 
AFIX   0 
C43   1    0.341057    0.702220    0.914709    11.00000    0.01254    0.04095 = 
         0.03236   -0.01668    0.00268   -0.00263 
AFIX 137 
H43A  2    0.338500    0.757060    0.860180    11.00000   -1.50000 
H43B  2    0.261715    0.712750    0.948321    11.00000   -1.50000 
H43C  2    0.334442    0.650426    0.900032    11.00000   -1.50000 
AFIX   0 
C44   1    0.759285    0.927213    0.855857    11.00000    0.04050    0.02004 = 
         0.02223   -0.00978   -0.00824    0.00030 
AFIX 137 
H44A  2    0.659473    0.923615    0.857203    11.00000   -1.50000 
H44B  2    0.768836    0.989500    0.845203    11.00000   -1.50000 
H44C  2    0.809563    0.884259    0.912601    11.00000   -1.50000 
AFIX   0 
C45   1    0.730259    0.972111    0.658709    11.00000    0.02360    0.02016 = 
         0.01921   -0.00517   -0.00081   -0.00033 
AFIX 137 
H45A  2    0.765462    0.952514    0.612563    11.00000   -1.50000 
H45B  2    0.739037    1.035648    0.642517    11.00000   -1.50000 
H45C  2    0.631143    0.967442    0.664870    11.00000   -1.50000 
AFIX   0 
C46   1    1.017651    0.921374    0.757932    11.00000    0.02113    0.02080 = 
         0.05725   -0.00709   -0.00297   -0.00679 
AFIX 137 
H46A  2    1.073415    0.883427    0.814180    11.00000   -1.50000 
H46B  2    1.013114    0.986074    0.744894    11.00000   -1.50000 
H46C  2    1.061814    0.907207    0.710656    11.00000   -1.50000 
AFIX   0 
SI6   5    0.475864    0.750436    0.641177    11.00000    0.01564    0.01892 = 
         0.02175   -0.00665   -0.00707    0.00007 
C48   1    0.527901    0.750344    0.532361    11.00000    0.02169    0.08094 = 
         0.01813   -0.00648   -0.00243   -0.00498 
AFIX 137 
H48A  2    0.614540    0.774291    0.517784    11.00000   -1.50000 
H48B  2    0.452536    0.788963    0.486299    11.00000   -1.50000 
H48C  2    0.543834    0.687732    0.536102    11.00000   -1.50000 
AFIX   0 
C49   1    0.332938    0.683870    0.676467    11.00000    0.01943    0.04810 = 
         0.03360   -0.01686   -0.00271   -0.00853 
AFIX 137 
H49A  2    0.370399    0.619631    0.688604    11.00000   -1.50000 
H49B  2    0.256623    0.708678    0.629302    11.00000   -1.50000 
H49C  2    0.296695    0.688328    0.730037    11.00000   -1.50000 
AFIX   0 
C47   1    0.403595    0.869838    0.625024    11.00000    0.06441    0.02759 = 
         0.08194   -0.02239   -0.05922    0.01682 
AFIX 137 
H47A  2    0.379973    0.871352    0.681933    11.00000   -1.50000 
H47B  2    0.318659    0.893798    0.584183    11.00000   -1.50000 
H47C  2    0.473929    0.907521    0.600411    11.00000   -1.50000 
PART   0 
  
AFIX   0 
HKLF 5 
  
REM  x13085_t4 in P-1 
REM R1 =  0.0374 for   16078 Fo > 4sig(Fo)  and  0.0431 for all   17550 data 
REM    452 parameters refined using    750 restraints 
  
END 
  
WGHT      0.0342      1.9724 
  
REM Highest difference peak  0.504,  deepest hole -0.513,  1-sigma level  0.070 
Q1    1   0.3647  0.2865  0.7841  11.00000  0.05    0.50 
Q2    1   0.8035  0.7610  0.6912  11.00000  0.05    0.48 
Q3    1   0.2072  0.1108  0.8374  11.00000  0.05    0.43 
Q4    1   0.8312  0.8355  0.7558  11.00000  0.05    0.43 
Q5    1   0.0370  0.2529  0.5004  11.00000  0.05    0.37 
Q6    1   0.0538  0.2726  0.6753  11.00000  0.05    0.35 
Q7    1   0.4433  0.7364  1.0486  11.00000  0.05    0.35 
Q8    1   0.3916  0.4309  0.6332  11.00000  0.05    0.35 
Q9    1   0.2990  0.2764  0.6521  11.00000  0.05    0.34 
Q10   1   0.2172  0.2580  0.9067  11.00000  0.05    0.33 
Q11   1   0.0783  0.1829  0.7778  11.00000  0.05    0.32 
Q12   1   0.5149  0.7483  0.5894  11.00000  0.05    0.31 
Q13   1   0.1921  0.3959  0.7694  11.00000  0.05    0.31 
Q14   1   0.4000  0.7147  0.6634  11.00000  0.05    0.30 
Q15   1   0.5168  0.3412  0.6120  11.00000  0.05    0.30 
Q16   1   0.2602  0.3872  0.4387  11.00000  0.05    0.29 
Q17   1   0.0415  0.2589  1.0657  11.00000  0.05    0.29 
Q18   1   0.2627  0.2620  0.6213  11.00000  0.05    0.29 
Q19   1   0.0114  0.1453  0.5608  11.00000  0.05    0.28 
Q20   1   0.5559  0.7726  0.8019  11.00000  0.05    0.28 
; 
_shelx_res_checksum   27852 
  
_shelx_hkl_file 
; 
   1   0   0 25.3267 0.53656  -2 
   1   0   0 25.3267 0.53656   1 
   2   0   0 203.059 2.85331  -2 
   2   0   0 203.059 2.85331   1 
   3   0   0 85.7294 1.38363  -2 
   3   0   0 85.7294 1.38363   1 
   4   0   0 650.924 7.28732  -2 
   4   0   0 650.924 7.28732   1 
   5   0   0 0.26614 0.29174  -2 
   5   0   0 0.26614 0.29174   1 
   6   0   0 6646.63 69.6256  -2 
   6   0   0 6646.63 69.6256   1 
   7   0   0 45.8606 1.13042  -2 
   7   0   0 45.8606 1.13042   1 
   8   0   0 15.8941 0.94315  -2 
   8   0   0 15.8941 0.94315   1 
   9   0   0 48.3479 1.46987  -2 
   9   0   0 48.3479 1.46987   1 
  10   0   0 2.77734 0.79367  -2 
  10   0   0 2.77734 0.79367   1 
  11   0   0 10.7946 1.19902  -2 
  11   0   0 10.7946 1.19902   1 
  12   0   0 254.227 5.59438  -2 
  12   0   0 254.227 5.59438   1 
  13   0   0 41.8255 2.12370  -2 
  13   0   0 41.8255 2.12370   1 
 -13   1   0 44.5234 2.25238  -2 
 -13   1   0 44.5234 2.25238   1 
 -12   1   0 7.18291 1.26040  -2 
 -12   1   0 7.18291 1.26040   1 
 -11   1   0 53.4632 2.19745  -2 
 -11   1   0 53.4632 2.19745   1 
 -10   1   0 35.5320 1.52842  -2 
 -10   1   0 35.5320 1.52842   1 
  -9   1   0 1.63356 0.65475  -2 
  -9   1   0 1.63356 0.65475   1 
  -8   1   0 234.230 3.68288  -2 
  -8   1   0 234.230 3.68288   1 
  -7   1   0 1530.37 17.4647  -2 
  -7   1   0 1530.37 17.4647   1 
  -6   1   0 97.7918 1.52956  -2 
  -6   1   0 97.7918 1.52956   1 
  -5   1   0 0.96798 0.31343  -2 
  -5   1   0 0.96798 0.31343   1 
  -4   1   0 22.0065 0.57626  -2 
  -4   1   0 22.0065 0.57626   1 
  -3   1   0 190.589 2.35647  -2 
  -3   1   0 190.589 2.35647   1 
  -2   1   0 58.8618 0.91496  -2 
  -2   1   0 58.8618 0.91496   1 
  -1   1   0 9999.99 158.265  -2 
  -1   1   0 9999.99 158.265   1 
   0   1   0 20.6132 0.41564  -2 
   0   1   0 20.6132 0.41564   1 
   1   1   0 5635.63 82.0829  -2 
   1   1   0 5635.63 82.0829   1 
   2   1   0 0.21501 0.26808  -2 
   2   1   0 0.21501 0.26808   1 
   3   1   0 17.0691 0.49947  -2 
   3   1   0 17.0691 0.49947   1 
   4   1   0 39.9565 0.77949  -2 
   4   1   0 39.9565 0.77949   1 
   5   1   0 1337.70 14.9252  -2 
   5   1   0 1337.70 14.9252   1 
   6   1   0 27.2877 0.86858  -2 
   6   1   0 27.2877 0.86858   1 
   7   1   0 713.514 8.46852  -2 
   7   1   0 713.514 8.46852   1 
   8   1   0 0.22898 0.53533  -2 
   8   1   0 0.22898 0.53533   1 
   9   1   0 0.99561 0.63741  -2 
   9   1   0 0.99561 0.63741   1 
  10   1   0 40.0358 1.51120  -2 
  10   1   0 40.0358 1.51120   1 
  11   1   0 108.042 2.79944  -2 
  11   1   0 108.042 2.79944   1 
  12   1   0 60.4648 2.21301  -2 
  12   1   0 60.4648 2.21301   1 
  13   1   0 93.2783 3.16196  -2 
  13   1   0 93.2783 3.16196   1 
 -13   2   0 2.59912 1.31433  -2 
 -13   2   0 2.59912 1.31433   1 
 -12   2   0 0.85781 1.04661  -2 
 -12   2   0 0.85781 1.04661   1 
 -11   2   0 50.3688 2.01739  -2 
 -11   2   0 50.3688 2.01739   1 
 -10   2   0 42.1104 1.71243  -2 
 -10   2   0 42.1104 1.71243   1 
  -9   2   0 33.2117 1.29401  -2 
  -9   2   0 33.2117 1.29401   1 
  -8   2   0 47.2768 1.43867  -2 
  -8   2   0 47.2768 1.43867   1 
  -7   2   0 56.6818 1.35184  -2 
  -7   2   0 56.6818 1.35184   1 
  -6   2   0 1648.73 17.6662  -2 
  -6   2   0 1648.73 17.6662   1 
  -5   2   0 54.7458 0.98139  -2 
  -5   2   0 54.7458 0.98139   1 
  -4   2   0 1061.99 11.3874  -2 
  -4   2   0 1061.99 11.3874   1 
  -3   2   0 153.189 2.03712  -2 
  -3   2   0 153.189 2.03712   1 
  -2   2   0 2104.97 24.8604  -2 
  -2   2   0 2104.97 24.8604   1 
  -1   2   0 0.23323 0.20450  -2 
  -1   2   0 0.23323 0.20450   1 
   0   2   0 8230.61 125.392  -2 
   0   2   0 8230.61 125.392   1 
   1   2   0 4.37674 0.27789  -2 
   1   2   0 4.37674 0.27789   1 
   2   2   0 4483.41 50.2282  -2 
   2   2   0 4483.41 50.2282   1 
   3   2   0 16.5573 0.45927  -2 
   3   2   0 16.5573 0.45927   1 
   4   2   0 700.969 8.17484  -2 
   4   2   0 700.969 8.17484   1 
   5   2   0 185.891 2.43093  -2 
   5   2   0 185.891 2.43093   1 
   6   2   0 2507.18 27.7009  -2 
   6   2   0 2507.18 27.7009   1 
   7   2   0 0.91489 0.47697  -2 
   7   2   0 0.91489 0.47697   1 
   8   2   0 11.4457 0.80283  -2 
   8   2   0 11.4457 0.80283   1 
   9   2   0 36.1160 1.29770  -2 
   9   2   0 36.1160 1.29770   1 
  10   2   0 30.3334 1.36292  -2 
  10   2   0 30.3334 1.36292   1 
  11   2   0 150.602 3.43894  -2 
  11   2   0 150.602 3.43894   1 
  12   2   0 256.108 5.12896  -2 
  12   2   0 256.108 5.12896   1 
  13   2   0 -1.0733 1.01749  -2 
  13   2   0 -1.0733 1.01749   1 
 -13   3   0 96.0748 3.16711  -2 
 -13   3   0 96.0748 3.16711   1 
 -12   3   0 0.75458 1.07456  -2 
 -12   3   0 0.75458 1.07456   1 
 -11   3   0 86.4636 2.57623  -2 
 -11   3   0 86.4636 2.57623   1 
 -10   3   0 29.6859 1.51860  -2 
 -10   3   0 29.6859 1.51860   1 
  -9   3   0 137.543 2.76481  -2 
  -9   3   0 137.543 2.76481   1 
  -8   3   0 8.01748 0.85880  -2 
  -8   3   0 8.01748 0.85880   1 
  -7   3   0 426.554 6.07508  -2 
  -7   3   0 426.554 6.07508   1 
  -6   3   0 1.05623 0.42814  -2 
  -6   3   0 1.05623 0.42814   1 
  -5   3   0 378.797 4.38177  -2 
  -5   3   0 378.797 4.38177   1 
  -4   3   0 8.90662 0.48588  -2 
  -4   3   0 8.90662 0.48588   1 
  -3   3   0 727.641 8.06382  -2 
  -3   3   0 727.641 8.06382   1 
  -2   3   0 40.8018 0.67749  -2 
  -2   3   0 40.8018 0.67749   1 
  -1   3   0 323.706 3.97125  -2 
  -1   3   0 323.706 3.97125   1 
   0   3   0 36.4825 0.62296  -2 
   0   3   0 36.4825 0.62296   1 
   1   3   0 3535.24 41.5830  -2 
   1   3   0 3535.24 41.5830   1 
   2   3   0 91.3649 1.24883  -2 
   2   3   0 91.3649 1.24883   1 
   3   3   0 7221.27 76.4227  -2 
   3   3   0 7221.27 76.4227   1 
   4   3   0 180.877 2.18142  -2 
   4   3   0 180.877 2.18142   1 
   5   3   0 631.268 7.27231  -2 
   5   3   0 631.268 7.27231   1 
   6   3   0 27.2517 0.82520  -2 
   6   3   0 27.2517 0.82520   1 
   7   3   0 81.4660 1.56019  -2 
   7   3   0 81.4660 1.56019   1 
   8   3   0 2.74983 0.61929  -2 
   8   3   0 2.74983 0.61929   1 
   9   3   0 119.701 2.34000  -2 
   9   3   0 119.701 2.34000   1 
  10   3   0 12.4926 1.05487  -2 
  10   3   0 12.4926 1.05487   1 
  11   3   0 182.759 3.90405  -2 
  11   3   0 182.759 3.90405   1 
  12   3   0 4.63603 1.16945  -2 
  12   3   0 4.63603 1.16945   1 
  13   3   0 0.24579 1.04109  -2 
  13   3   0 0.24579 1.04109   1 
 -12   4   0 1.77212 1.16088  -2 
 -12   4   0 1.77212 1.16088   1 
 -11   4   0 -1.8921 0.96106  -2 
 -11   4   0 -1.8921 0.96106   1 
 -10   4   0 11.3309 1.15084  -2 
 -10   4   0 11.3309 1.15084   1 
  -9   4   0 47.8270 1.60760  -2 
  -9   4   0 47.8270 1.60760   1 
  -8   4   0 288.650 4.41632  -2 
  -8   4   0 288.650 4.41632   1 
  -7   4   0 13.3217 0.89961  -2 
  -7   4   0 13.3217 0.89961   1 
  -6   4   0 960.357 11.1478  -2 
  -6   4   0 960.357 11.1478   1 
  -5   4   0 54.9940 1.02743  -2 
  -5   4   0 54.9940 1.02743   1 
  -4   4   0 1972.11 20.8932  -2 
  -4   4   0 1972.11 20.8932   1 
  -3   4   0 31.5354 0.64395  -2 
  -3   4   0 31.5354 0.64395   1 
  -2   4   0 427.483 4.95571  -2 
  -2   4   0 427.483 4.95571   1 
  -1   4   0 247.828 2.92967  -2 
  -1   4   0 247.828 2.92967   1 
   0   4   0 654.067 7.68598  -2 
   0   4   0 654.067 7.68598   1 
   1   4   0 17.1167 0.42039  -2 
   1   4   0 17.1167 0.42039   1 
   2   4   0 785.215 8.82064  -2 
   2   4   0 785.215 8.82064   1 
   3   4   0 203.474 2.42591  -2 
   3   4   0 203.474 2.42591   1 
   4   4   0 78.8300 1.12598  -2 
   4   4   0 78.8300 1.12598   1 
   5   4   0 41.9930 0.80767  -2 
   5   4   0 41.9930 0.80767   1 
   6   4   0 15.9489 0.67985  -2 
   6   4   0 15.9489 0.67985   1 
   7   4   0 11.9338 0.73247  -2 
   7   4   0 11.9338 0.73247   1 
   8   4   0 17.9592 0.94900  -2 
   8   4   0 17.9592 0.94900   1 
   9   4   0 5.41039 0.79661  -2 
   9   4   0 5.41039 0.79661   1 
  10   4   0 7.13372 0.94871  -2 
  10   4   0 7.13372 0.94871   1 
  11   4   0 4.42565 1.02872  -2 
  11   4   0 4.42565 1.02872   1 
  12   4   0 32.1686 1.79788  -2 
  12   4   0 32.1686 1.79788   1 
  13   4   0 -3.1050 0.96679  -2 
  13   4   0 -3.1050 0.96679   1 
 -12   5   0 16.2878 1.58890  -2 
 -12   5   0 16.2878 1.58890   1 
 -11   5   0 -0.6798 1.02544  -2 
 -11   5   0 -0.6798 1.02544   1 
 -10   5   0 12.9522 1.29646  -2 
 -10   5   0 12.9522 1.29646   1 
  -9   5   0 226.226 3.98095  -2 
  -9   5   0 226.226 3.98095   1 
  -8   5   0 10.2331 0.90406  -2 
  -8   5   0 10.2331 0.90406   1 
  -7   5   0 1011.49 13.2111  -2 
  -7   5   0 1011.49 13.2111   1 
  -6   5   0 5.84640 0.65457  -2 
  -6   5   0 5.84640 0.65457   1 
  -5   5   0 174.462 2.30896  -2 
  -5   5   0 174.462 2.30896   1 
  -4   5   0 28.6520 0.68559  -2 
  -4   5   0 28.6520 0.68559   1 
  -3   5   0 1721.40 17.7732  -2 
  -3   5   0 1721.40 17.7732   1 
  -2   5   0 25.5279 0.55044  -2 
  -2   5   0 25.5279 0.55044   1 
  -1   5   0 3449.81 38.2208  -2 
  -1   5   0 3449.81 38.2208   1 
   0   5   0 450.853 5.18111  -2 
   0   5   0 450.853 5.18111   1 
   1   5   0 1517.83 16.6117  -2 
   1   5   0 1517.83 16.6117   1 
   2   5   0 22.0868 0.49010  -2 
   2   5   0 22.0868 0.49010   1 
   3   5   0 19.9366 0.50413  -2 
   3   5   0 19.9366 0.50413   1 
   4   5   0 92.2273 1.27311  -2 
   4   5   0 92.2273 1.27311   1 
   5   5   0 392.214 4.33740  -2 
   5   5   0 392.214 4.33740   1 
   6   5   0 1.77135 0.37341  -2 
   6   5   0 1.77135 0.37341   1 
   7   5   0 420.936 5.49583  -2 
   7   5   0 420.936 5.49583   1 
   8   5   0 5.43843 0.70610  -2 
   8   5   0 5.43843 0.70610   1 
   9   5   0 413.086 6.30954  -2 
   9   5   0 413.086 6.30954   1 
  10   5   0 64.3544 1.93185  -2 
  10   5   0 64.3544 1.93185   1 
  11   5   0 172.387 3.76163  -2 
  11   5   0 172.387 3.76163   1 
  12   5   0 -1.8241 0.89915  -2 
  12   5   0 -1.8241 0.89915   1 
  13   5   0 -1.0581 0.99290  -2 
  13   5   0 -1.0581 0.99290   1 
 -12   6   0 11.4122 1.58956  -2 
 -12   6   0 11.4122 1.58956   1 
 -11   6   0 47.0438 2.12495  -2 
 -11   6   0 47.0438 2.12495   1 
 -10   6   0 28.0867 1.72009  -2 
 -10   6   0 28.0867 1.72009   1 
  -9   6   0 -0.4712 0.81100  -2 
  -9   6   0 -0.4712 0.81100   1 
  -8   6   0 197.041 3.51693  -2 
  -8   6   0 197.041 3.51693   1 
  -7   6   0 245.704 3.84951  -2 
  -7   6   0 245.704 3.84951   1 
  -6   6   0 940.125 11.8293  -2 
  -6   6   0 940.125 11.8293   1 
  -5   6   0 2.12224 0.46084  -2 
  -5   6   0 2.12224 0.46084   1 
  -4   6   0 300.266 3.47518  -2 
  -4   6   0 300.266 3.47518   1 
  -3   6   0 15.8643 0.53373  -2 
  -3   6   0 15.8643 0.53373   1 
  -2   6   0 662.621 7.20508  -2 
  -2   6   0 662.621 7.20508   1 
  -1   6   0 1.23466 0.25008  -2 
  -1   6   0 1.23466 0.25008   1 
   0   6   0 2944.96 31.7455  -2 
   0   6   0 2944.96 31.7455   1 
   1   6   0 12.3651 0.39518  -2 
   1   6   0 12.3651 0.39518   1 
   2   6   0 190.760 2.23084  -2 
   2   6   0 190.760 2.23084   1 
   3   6   0 17.7390 0.49765  -2 
   3   6   0 17.7390 0.49765   1 
   4   6   0 3.07228 0.31829  -2 
   4   6   0 3.07228 0.31829   1 
   5   6   0 21.3327 0.62931  -2 
   5   6   0 21.3327 0.62931   1 
   6   6   0 259.422 3.09235  -2 
   6   6   0 259.422 3.09235   1 
   7   6   0 -0.2381 0.45767  -2 
   7   6   0 -0.2381 0.45767   1 
   8   6   0 82.1932 1.85757  -2 
   8   6   0 82.1932 1.85757   1 
   9   6   0 32.6537 1.29227  -2 
   9   6   0 32.6537 1.29227   1 
  10   6   0 3.47229 0.82053  -2 
  10   6   0 3.47229 0.82053   1 
  11   6   0 1.51365 1.00142  -2 
  11   6   0 1.51365 1.00142   1 
  12   6   0 97.7815 2.75397  -2 
  12   6   0 97.7815 2.75397   1 
  13   6   0 107.013 3.00331  -2 
  13   6   0 107.013 3.00331   1 
 -11   7   0 26.8476 1.84420  -2 
 -11   7   0 26.8476 1.84420   1 
 -10   7   0 28.6180 1.79330  -2 
 -10   7   0 28.6180 1.79330   1 
  -9   7   0 212.821 4.06600  -2 
  -9   7   0 212.821 4.06600   1 
  -8   7   0 234.979 4.04217  -2 
  -8   7   0 234.979 4.04217   1 
  -7   7   0 217.150 3.52368  -2 
  -7   7   0 217.150 3.52368   1 
  -6   7   0 2.21157 0.63923  -2 
  -6   7   0 2.21157 0.63923   1 
  -5   7   0 23.6489 0.92614  -2 
  -5   7   0 23.6489 0.92614   1 
  -4   7   0 72.4571 1.24809  -2 
  -4   7   0 72.4571 1.24809   1 
  -3   7   0 1161.53 12.4921  -2 
  -3   7   0 1161.53 12.4921   1 
  -2   7   0 132.512 1.73027  -2 
  -2   7   0 132.512 1.73027   1 
  -1   7   0 1962.59 20.7290  -2 
  -1   7   0 1962.59 20.7290   1 
   0   7   0 67.1408 0.99982  -2 
   0   7   0 67.1408 0.99982   1 
   1   7   0 82.6803 1.15874  -2 
   1   7   0 82.6803 1.15874   1 
   2   7   0 109.433 1.37921  -2 
   2   7   0 109.433 1.37921   1 
   3   7   0 29.2978 0.63181  -2 
   3   7   0 29.2978 0.63181   1 
   4   7   0 53.8187 0.91960  -2 
   4   7   0 53.8187 0.91960   1 
   5   7   0 3948.73 39.9668  -2 
   5   7   0 3948.73 39.9668   1 
   6   7   0 97.7545 1.51884  -2 
   6   7   0 97.7545 1.51884   1 
   7   7   0 14.4252 0.72156  -2 
   7   7   0 14.4252 0.72156   1 
   8   7   0 23.0831 1.06073  -2 
   8   7   0 23.0831 1.06073   1 
   9   7   0 132.252 2.63767  -2 
   9   7   0 132.252 2.63767   1 
  10   7   0 0.52182 0.71880  -2 
  10   7   0 0.52182 0.71880   1 
  11   7   0 747.583 13.1984  -2 
  11   7   0 747.583 13.1984   1 
  12   7   0 42.3824 2.05730  -2 
  12   7   0 42.3824 2.05730   1 
  13   7   0 18.6518 1.56321  -2 
  13   7   0 18.6518 1.56321   1 
 -11   8   0 116.576 3.23878  -2 
 -11   8   0 116.576 3.23878   1 
 -10   8   0 426.748 7.64834  -2 
 -10   8   0 426.748 7.64834   1 
  -9   8   0 20.6394 1.50440  -2 
  -9   8   0 20.6394 1.50440   1 
  -8   8   0 16.0533 1.18745  -2 
  -8   8   0 16.0533 1.18745   1 
  -7   8   0 23.3682 1.22359  -2 
  -7   8   0 23.3682 1.22359   1 
  -6   8   0 26.1145 1.09226  -2 
  -6   8   0 26.1145 1.09226   1 
  -5   8   0 26.8534 1.03279  -2 
  -5   8   0 26.8534 1.03279   1 
  -4   8   0 833.425 10.1142  -2 
  -4   8   0 833.425 10.1142   1 
  -3   8   0 84.0833 1.34601  -2 
  -3   8   0 84.0833 1.34601   1 
  -2   8   0 554.111 6.15987  -2 
  -2   8   0 554.111 6.15987   1 
  -1   8   0 10.2370 0.46671  -2 
  -1   8   0 10.2370 0.46671   1 
   0   8   0 4.88321 0.35136  -2 
   0   8   0 4.88321 0.35136   1 
   1   8   0 13.5153 0.47795  -2 
   1   8   0 13.5153 0.47795   1 
   2   8   0 426.962 4.54131  -2 
   2   8   0 426.962 4.54131   1 
   3   8   0 73.4354 1.10675  -2 
   3   8   0 73.4354 1.10675   1 
   4   8   0 2022.21 20.6543  -2 
   4   8   0 2022.21 20.6543   1 
   5   8   0 21.6844 0.67567  -2 
   5   8   0 21.6844 0.67567   1 
   6   8   0 639.133 7.30578  -2 
   6   8   0 639.133 7.30578   1 
   7   8   0 7.92193 0.66292  -2 
   7   8   0 7.92193 0.66292   1 
   8   8   0 150.043 2.52266  -2 
   8   8   0 150.043 2.52266   1 
   9   8   0 12.9657 1.06591  -2 
   9   8   0 12.9657 1.06591   1 
  10   8   0 393.034 6.53651  -2 
  10   8   0 393.034 6.53651   1 
  11   8   0 0.52684 0.93537  -2 
  11   8   0 0.52684 0.93537   1 
  12   8   0 111.948 3.17084  -2 
  12   8   0 111.948 3.17084   1 
  13   8   0 32.9687 1.98470  -2 
  13   8   0 32.9687 1.98470   1 
 -11   9   0 19.7791 1.68860  -2 
 -11   9   0 19.7791 1.68860   1 
 -10   9   0 10.0222 1.40654  -2 
 -10   9   0 10.0222 1.40654   1 
  -9   9   0 508.698 8.76080  -2 
  -9   9   0 508.698 8.76080   1 
  -8   9   0 2.69568 0.87848  -2 
  -8   9   0 2.69568 0.87848   1 
  -7   9   0 13.8851 1.04982  -2 
  -7   9   0 13.8851 1.04982   1 
  -6   9   0 186.492 3.13467  -2 
  -6   9   0 186.492 3.13467   1 
  -5   9   0 33.3985 1.16923  -2 
  -5   9   0 33.3985 1.16923   1 
  -4   9   0 0.35454 0.49883  -2 
  -4   9   0 0.35454 0.49883   1 
  -3   9   0 1502.85 17.0486  -2 
  -3   9   0 1502.85 17.0486   1 
  -2   9   0 145.143 1.98357  -2 
  -2   9   0 145.143 1.98357   1 
  -1   9   0 9.88076 0.47999  -2 
  -1   9   0 9.88076 0.47999   1 
   0   9   0 501.720 5.60356  -2 
   0   9   0 501.720 5.60356   1 
   1   9   0 218.826 2.65579  -2 
   1   9   0 218.826 2.65579   1 
   2   9   0 130.231 1.66410  -2 
   2   9   0 130.231 1.66410   1 
   3   9   0 449.638 4.90840  -2 
   3   9   0 449.638 4.90840   1 
   4   9   0 217.320 2.62519  -2 
   4   9   0 217.320 2.62519   1 
   5   9   0 1107.14 12.1920  -2 
   5   9   0 1107.14 12.1920   1 
   6   9   0 118.431 1.95259  -2 
   6   9   0 118.431 1.95259   1 
   7   9   0 95.1782 1.81853  -2 
   7   9   0 95.1782 1.81853   1 
   8   9   0 182.983 2.93573  -2 
   8   9   0 182.983 2.93573   1 
   9   9   0 90.9298 2.21654  -2 
   9   9   0 90.9298 2.21654   1 
  10   9   0 0.74731 0.88190  -2 
  10   9   0 0.74731 0.88190   1 
  11   9   0 430.069 8.17387  -2 
  11   9   0 430.069 8.17387   1 
  12   9   0 3.95778 1.07051  -2 
  12   9   0 3.95778 1.07051   1 
  13   9   0 36.0352 2.17724  -2 
  13   9   0 36.0352 2.17724   1 
 -10  10   0 371.403 6.95931  -2 
 -10  10   0 371.403 6.95931   1 
  -9  10   0 -0.8534 0.92658  -2 
  -9  10   0 -0.8534 0.92658   1 
  -8  10   0 6.81235 1.08735  -2 
  -8  10   0 6.81235 1.08735   1 
  -7  10   0 132.261 2.87668  -2 
  -7  10   0 132.261 2.87668   1 
  -6  10   0 6.16732 0.80588  -2 
  -6  10   0 6.16732 0.80588   1 
  -5  10   0 38.9345 1.26193  -2 
  -5  10   0 38.9345 1.26193   1 
  -4  10   0 564.550 7.63894  -2 
  -4  10   0 564.550 7.63894   1 
  -3  10   0 162.971 2.63615  -2 
  -3  10   0 162.971 2.63615   1 
  -2  10   0 17.8193 0.75012  -2 
  -2  10   0 17.8193 0.75012   1 
  -1  10   0 256.579 3.17763  -2 
  -1  10   0 256.579 3.17763   1 
   0  10   0 157.094 2.10426  -2 
   0  10   0 157.094 2.10426   1 
   1  10   0 369.563 4.27184  -2 
   1  10   0 369.563 4.27184   1 
   2  10   0 266.406 3.08972  -2 
   2  10   0 266.406 3.08972   1 
   3  10   0 539.193 5.94564  -2 
   3  10   0 539.193 5.94564   1 
   4  10   0 41.5077 0.94583  -2 
   4  10   0 41.5077 0.94583   1 
   5  10   0 114.761 1.88408  -2 
   5  10   0 114.761 1.88408   1 
   6  10   0 13.7169 0.78630  -2 
   6  10   0 13.7169 0.78630   1 
   7  10   0 97.4972 1.87147  -2 
   7  10   0 97.4972 1.87147   1 
   8  10   0 7.92050 0.77743  -2 
   8  10   0 7.92050 0.77743   1 
   9  10   0 0.18372 0.68878  -2 
   9  10   0 0.18372 0.68878   1 
  10  10   0 286.059 5.41876  -2 
  10  10   0 286.059 5.41876   1 
  11  10   0 1.79357 0.97156  -2 
  11  10   0 1.79357 0.97156   1 
  12  10   0 4.45048 1.12416  -2 
  12  10   0 4.45048 1.12416   1 
  13  10   0 9.58147 1.43361  -2 
  13  10   0 9.58147 1.43361   1 
 -10  11   0 1.71128 1.32940  -2 
 -10  11   0 1.71128 1.32940   1 
  -9  11   0 431.589 7.74222  -2 
  -9  11   0 431.589 7.74222   1 
  -8  11   0 11.2873 1.28345  -2 
  -8  11   0 11.2873 1.28345   1 
  -7  11   0 38.2708 1.64290  -2 
  -7  11   0 38.2708 1.64290   1 
  -6  11   0 1.81041 0.81262  -2 
  -6  11   0 1.81041 0.81262   1 
  -5  11   0 13.6260 0.96726  -2 
  -5  11   0 13.6260 0.96726   1 
  -4  11   0 2.91936 0.62940  -2 
  -4  11   0 2.91936 0.62940   1 
  -3  11   0 439.531 6.09501  -2 
  -3  11   0 439.531 6.09501   1 
  -2  11   0 13.0672 0.76634  -2 
  -2  11   0 13.0672 0.76634   1 
  -1  11   0 7.58931 0.59065  -2 
  -1  11   0 7.58931 0.59065   1 
   0  11   0 96.4839 1.64157  -2 
   0  11   0 96.4839 1.64157   1 
   1  11   0 13.7195 0.64616  -2 
   1  11   0 13.7195 0.64616   1 
   2  11   0 83.4571 1.37831  -2 
   2  11   0 83.4571 1.37831   1 
   3  11   0 76.0499 1.37573  -2 
   3  11   0 76.0499 1.37573   1 
   4  11   0 44.9108 1.08210  -2 
   4  11   0 44.9108 1.08210   1 
   5  11   0 14.6241 0.77759  -2 
   5  11   0 14.6241 0.77759   1 
   6  11   0 185.559 2.87432  -2 
   6  11   0 185.559 2.87432   1 
   7  11   0 33.0923 1.13287  -2 
   7  11   0 33.0923 1.13287   1 
   8  11   0 39.6732 1.31432  -2 
   8  11   0 39.6732 1.31432   1 
   9  11   0 134.626 2.61539  -2 
   9  11   0 134.626 2.61539   1 
  10  11   0 38.3726 1.82876  -2 
  10  11   0 38.3726 1.82876   1 
  11  11   0 44.0572 1.96824  -2 
  11  11   0 44.0572 1.96824   1 
  12  11   0 26.5544 1.71172  -2 
  12  11   0 26.5544 1.71172   1 
  13  11   0 -0.5978 1.10091  -2 
  13  11   0 -0.5978 1.10091   1 
  -9  12   0 9.70644 1.38960  -2 
  -9  12   0 9.70644 1.38960   1 
  -8  12   0 9.95769 1.26588  -2 
  -8  12   0 9.95769 1.26588   1 
  -7  12   0 1.15334 0.93894  -2 
  -7  12   0 1.15334 0.93894   1 
  -6  12   0 13.1103 1.13923  -2 
  -6  12   0 13.1103 1.13923   1 
  -5  12   0 194.765 3.47332  -2 
  -5  12   0 194.765 3.47332   1 
  -4  12   0 542.353 7.49807  -2 
  -4  12   0 542.353 7.49807   1 
  -3  12   0 119.679 2.22329  -2 
  -3  12   0 119.679 2.22329   1 
  -2  12   0 112.533 2.07630  -2 
  -2  12   0 112.533 2.07630   1 
  -1  12   0 38.6037 1.12211  -2 
  -1  12   0 38.6037 1.12211   1 
   0  12   0 82.3959 1.63477  -2 
   0  12   0 82.3959 1.63477   1 
   1  12   0 477.345 6.47572  -2 
   1  12   0 477.345 6.47572   1 
   2  12   0 177.986 2.66757  -2 
   2  12   0 177.986 2.66757   1 
   3  12   0 306.063 4.18133  -2 
   3  12   0 306.063 4.18133   1 
   4  12   0 59.2178 1.32226  -2 
   4  12   0 59.2178 1.32226   1 
   5  12   0 177.675 2.76561  -2 
   5  12   0 177.675 2.76561   1 
   6  12   0 3.58707 0.61013  -2 
   6  12   0 3.58707 0.61013   1 
   7  12   0 34.9746 1.18094  -2 
   7  12   0 34.9746 1.18094   1 
   8  12   0 4.32053 0.72679  -2 
   8  12   0 4.32053 0.72679   1 
   9  12   0 117.284 2.52262  -2 
   9  12   0 117.284 2.52262   1 
  10  12   0 245.177 4.79978  -2 
  10  12   0 245.177 4.79978   1 
  11  12   0 10.0689 1.28000  -2 
  11  12   0 10.0689 1.28000   1 
  12  12   0 38.5226 1.95000  -2 
  12  12   0 38.5226 1.95000   1 
  -9  13   0 224.290 5.58609  -2 
  -9  13   0 224.290 5.58609   1 
  -8  13   0 71.3610 2.47219  -2 
  -8  13   0 71.3610 2.47219   1 
  -7  13   0 4.02951 1.08813  -2 
  -7  13   0 4.02951 1.08813   1 
  -6  13   0 -0.0586 0.83876  -2 
  -6  13   0 -0.0586 0.83876   1 
  -5  13   0 40.3758 1.58845  -2 
  -5  13   0 40.3758 1.58845   1 
  -4  13   0 0.54188 0.74509  -2 
  -4  13   0 0.54188 0.74509   1 
  -3  13   0 409.104 5.85376  -2 
  -3  13   0 409.104 5.85376   1 
  -2  13   0 110.968 2.12477  -2 
  -2  13   0 110.968 2.12477   1 
  -1  13   0 454.807 6.29453  -2 
  -1  13   0 454.807 6.29453   1 
   0  13   0 9.87570 0.73696  -2 
   0  13   0 9.87570 0.73696   1 
   1  13   0 24.9055 0.97871  -2 
   1  13   0 24.9055 0.97871   1 
   2  13   0 0.96860 0.51552  -2 
   2  13   0 0.96860 0.51552   1 
   3  13   0 390.891 5.22049  -2 
   3  13   0 390.891 5.22049   1 
   4  13   0 51.1083 1.28963  -2 
   4  13   0 51.1083 1.28963   1 
   5  13   0 451.591 6.00826  -2 
   5  13   0 451.591 6.00826   1 
   6  13   0 36.1381 1.17506  -2 
   6  13   0 36.1381 1.17506   1 
   7  13   0 21.5797 1.11332  -2 
   7  13   0 21.5797 1.11332   1 
   8  13   0 8.21367 0.90804  -2 
   8  13   0 8.21367 0.90804   1 
   9  13   0 55.2082 1.79590  -2 
   9  13   0 55.2082 1.79590   1 
  10  13   0 1.88805 0.84199  -2 
  10  13   0 1.88805 0.84199   1 
  11  13   0 115.011 3.18591  -2 
  11  13   0 115.011 3.18591   1 
  12  13   0 1.58942 1.09817  -2 
  12  13   0 1.58942 1.09817   1 
  -8  14   0 8.04961 1.45936  -2 
  -8  14   0 8.04961 1.45936   1 
  -7  14   0 10.9458 1.35759  -2 
  -7  14   0 10.9458 1.35759   1 
  -6  14   0 3.19126 1.10400  -2 
  -6  14   0 3.19126 1.10400   1 
  -5  14   0 2.88326 0.92860  -2 
  -5  14   0 2.88326 0.92860   1 
  -4  14   0 430.450 6.93948  -2 
  -4  14   0 430.450 6.93948   1 
  -3  14   0 272.696 4.68469  -2 
  -3  14   0 272.696 4.68469   1 
  -2  14   0 39.4660 1.30134  -2 
  -2  14   0 39.4660 1.30134   1 
  -1  14   0 28.9646 1.13031  -2 
  -1  14   0 28.9646 1.13031   1 
   0  14   0 133.820 2.38201  -2 
   0  14   0 133.820 2.38201   1 
   1  14   0 47.3391 1.26105  -2 
   1  14   0 47.3391 1.26105   1 
   2  14   0 342.518 4.70265  -2 
   2  14   0 342.518 4.70265   1 
   3  14   0 177.256 2.80009  -2 
   3  14   0 177.256 2.80009   1 
   4  14   0 464.399 6.16723  -2 
   4  14   0 464.399 6.16723   1 
   5  14   0 16.2802 0.92869  -2 
   5  14   0 16.2802 0.92869   1 
   6  14   0 123.778 2.36633  -2 
   6  14   0 123.778 2.36633   1 
   7  14   0 108.103 2.33355  -2 
   7  14   0 108.103 2.33355   1 
   8  14   0 2.82246 0.75261  -2 
   8  14   0 2.82246 0.75261   1 
   9  14   0 10.8079 1.06242  -2 
   9  14   0 10.8079 1.06242   1 
  10  14   0 332.891 5.76329  -2 
  10  14   0 332.891 5.76329   1 
  11  14   0 25.3671 1.60427  -2 
  11  14   0 25.3671 1.60427   1 
  12  14   0 0.86833 1.02363  -2 
  12  14   0 0.86833 1.02363   1 
  -7  15   0 10.3984 1.54600  -2 
  -7  15   0 10.3984 1.54600   1 
  -6  15   0 101.155 2.84967  -2 
  -6  15   0 101.155 2.84967   1 
  -5  15   0 286.186 5.44666  -2 
  -5  15   0 286.186 5.44666   1 
  -4  15   0 61.8278 1.95456  -2 
  -4  15   0 61.8278 1.95456   1 
  -3  15   0 20.3620 1.29913  -2 
  -3  15   0 20.3620 1.29913   1 
  -2  15   0 8.35984 0.94439  -2 
  -2  15   0 8.35984 0.94439   1 
  -1  15   0 4.55629 0.81769  -2 
  -1  15   0 4.55629 0.81769   1 
   0  15   0 36.8178 1.26908  -2 
   0  15   0 36.8178 1.26908   1 
   1  15   0 273.694 3.96128  -2 
   1  15   0 273.694 3.96128   1 
   2  15   0 68.7719 1.57056  -2 
   2  15   0 68.7719 1.57056   1 
   3  15   0 401.260 5.47694  -2 
   3  15   0 401.260 5.47694   1 
   4  15   0 1.30343 0.62623  -2 
   4  15   0 1.30343 0.62623   1 
   5  15   0 73.0143 1.73395  -2 
   5  15   0 73.0143 1.73395   1 
   6  15   0 1.49631 0.69052  -2 
   6  15   0 1.49631 0.69052   1 
   7  15   0 16.2884 1.09538  -2 
   7  15   0 16.2884 1.09538   1 
   8  15   0 2.09307 0.82181  -2 
   8  15   0 2.09307 0.82181   1 
   9  15   0 162.612 3.37789  -2 
   9  15   0 162.612 3.37789   1 
  10  15   0 83.5452 2.34164  -2 
  10  15   0 83.5452 2.34164   1 
  11  15   0 39.3468 1.88952  -2 
  11  15   0 39.3468 1.88952   1 
  -6  16   0 150.165 3.87770  -2 
  -6  16   0 150.165 3.87770   1 
  -5  16   0 67.6130 2.34323  -2 
  -5  16   0 67.6130 2.34323   1 
  -4  16   0 353.347 6.39511  -2 
  -4  16   0 353.347 6.39511   1 
  -3  16   0 20.6634 1.35460  -2 
  -3  16   0 20.6634 1.35460   1 
  -2  16   0 124.093 2.75080  -2 
  -2  16   0 124.093 2.75080   1 
  -1  16   0 145.334 2.97139  -2 
  -1  16   0 145.334 2.97139   1 
   0  16   0 67.1020 1.87775  -2 
   0  16   0 67.1020 1.87775   1 
   1  16   0 0.69289 0.69530  -2 
   1  16   0 0.69289 0.69530   1 
   2  16   0 715.641 10.0915  -2 
   2  16   0 715.641 10.0915   1 
   3  16   0 4.23277 0.76073  -2 
   3  16   0 4.23277 0.76073   1 
   4  16   0 14.0677 1.00577  -2 
   4  16   0 14.0677 1.00577   1 
   5  16   0 120.253 2.47567  -2 
   5  16   0 120.253 2.47567   1 
   6  16   0 55.5563 1.66585  -2 
   6  16   0 55.5563 1.66585   1 
   7  16   0 26.8848 1.38144  -2 
   7  16   0 26.8848 1.38144   1 
   8  16   0 198.521 3.84879  -2 
   8  16   0 198.521 3.84879   1 
   9  16   0 1.09404 0.85537  -2 
   9  16   0 1.09404 0.85537   1 
  10  16   0 53.0522 1.91338  -2 
  10  16   0 53.0522 1.91338   1 
  11  16   0 15.7613 1.49430  -2 
  11  16   0 15.7613 1.49430   1 
  -6  17   0 42.9162 5.93191  -2 
  -6  17   0 42.9162 5.93191   1 
  -5  17   0 351.496 6.96731  -2 
  -5  17   0 351.496 6.96731   1 
  -4  17   0 4.54387 1.12788  -2 
  -4  17   0 4.54387 1.12788   1 
  -3  17   0 43.3213 1.91347  -2 
  -3  17   0 43.3213 1.91347   1 
  -2  17   0 42.8798 1.68486  -2 
  -2  17   0 42.8798 1.68486   1 
  -1  17   0 34.3415 1.51348  -2 
  -1  17   0 34.3415 1.51348   1 
   0  17   0 23.0017 1.32178  -2 
   0  17   0 23.0017 1.32178   1 
   1  17   0 247.179 4.14252  -2 
   1  17   0 247.179 4.14252   1 
   2  17   0 21.6490 1.20745  -2 
   2  17   0 21.6490 1.20745   1 
   3  17   0 20.5312 1.17418  -2 
   3  17   0 20.5312 1.17418   1 
   4  17   0 136.491 2.73471  -2 
   4  17   0 136.491 2.73471   1 
   5  17   0 12.3029 1.01304  -2 
   5  17   0 12.3029 1.01304   1 
   6  17   0 14.4683 1.15479  -2 
   6  17   0 14.4683 1.15479   1 
   7  17   0 208.978 3.99407  -2 
   7  17   0 208.978 3.99407   1 
   8  17   0 83.2871 2.28855  -2 
   8  17   0 83.2871 2.28855   1 
   9  17   0 36.2824 1.68045  -2 
   9  17   0 36.2824 1.68045   1 
  10  17   0 26.0455 1.64727  -2 
  10  17   0 26.0455 1.64727   1 
  -4  18   0 150.233 3.82560  -2 
  -4  18   0 150.233 3.82560   1 
  -3  18   0 17.4425 1.58220  -2 
  -3  18   0 17.4425 1.58220   1 
  -2  18   0 2.96520 0.99018  -2 
  -2  18   0 2.96520 0.99018   1 
  -1  18   0 26.1631 1.47409  -2 
  -1  18   0 26.1631 1.47409   1 
   0  18   0 10.6301 1.05034  -2 
   0  18   0 10.6301 1.05034   1 
   1  18   0 4.40268 0.87024  -2 
   1  18   0 4.40268 0.87024   1 
   2  18   0 29.6405 1.37189  -2 
   2  18   0 29.6405 1.37189   1 
   3  18   0 1.80117 0.77432  -2 
   3  18   0 1.80117 0.77432   1 
   4  18   0 0.02287 0.78060  -2 
   4  18   0 0.02287 0.78060   1 
   5  18   0 18.3395 1.33410  -2 
   5  18   0 18.3395 1.33410   1 
   6  18   0 60.8187 1.94574  -2 
   6  18   0 60.8187 1.94574   1 
   7  18   0 8.18264 1.06089  -2 
   7  18   0 8.18264 1.06089   1 
   8  18   0 11.2553 1.13716  -2 
   8  18   0 11.2553 1.13716   1 
   9  18   0 4.09025 0.97860  -2 
   9  18   0 4.09025 0.97860   1 
  -3  19   0 0.55607 1.13358  -2 
  -3  19   0 0.55607 1.13358   1 
  -2  19   0 2.01375 1.12133  -2 
  -2  19   0 2.01375 1.12133   1 
  -1  19   0 2.84671 1.06322  -2 
  -1  19   0 2.84671 1.06322   1 
   0  19   0 3.36307 1.02231  -2 
   0  19   0 3.36307 1.02231   1 
   1  19   0 1.11038 0.85916  -2 
   1  19   0 1.11038 0.85916   1 
   2  19   0 7.57424 1.01308  -2 
   2  19   0 7.57424 1.01308   1 
   3  19   0 1.75048 0.85965  -2 
   3  19   0 1.75048 0.85965   1 
   4  19   0 10.4892 1.10514  -2 
   4  19   0 10.4892 1.10514   1 
   5  19   0 4.66795 0.96864  -2 
   5  19   0 4.66795 0.96864   1 
   6  19   0 81.5132 2.29922  -2 
   6  19   0 81.5132 2.29922   1 
   7  19   0 6.57403 1.00882  -2 
   7  19   0 6.57403 1.00882   1 
   8  19   0 3.55669 0.97238  -2 
   8  19   0 3.55669 0.97238   1 
  -2  20   0 1.15374 1.13034  -2 
  -2  20   0 1.15374 1.13034   1 
  -1  20   0 0.44846 1.02897  -2 
  -1  20   0 0.44846 1.02897   1 
   0  20   0 44.6216 1.93131  -2 
   0  20   0 44.6216 1.93131   1 
   1  20   0 16.2005 1.42330  -2 
   1  20   0 16.2005 1.42330   1 
   2  20   0 31.2453 1.66716  -2 
   2  20   0 31.2453 1.66716   1 
   3  20   0 1.17385 0.93102  -2 
   3  20   0 1.17385 0.93102   1 
   4  20   0 78.5420 2.39150  -2 
   4  20   0 78.5420 2.39150   1 
   5  20   0 0.52484 0.94552  -2 
   5  20   0 0.52484 0.94552   1 
   6  20   0 0.56037 0.95132  -2 
   6  20   0 0.56037 0.95132   1 
   7  20   0 8.38952 1.21826  -2 
   7  20   0 8.38952 1.21826   1 
   1  21   0 90.6316 2.63456  -2 
   1  21   0 90.6316 2.63456   1 
   2  21   0 -0.7600 0.95324  -2 
   2  21   0 -0.7600 0.95324   1 
   3  21   0 118.749 3.03225  -2 
   3  21   0 118.749 3.03225   1 
   4  21   0 1.97818 0.98829  -2 
   4  21   0 1.97818 0.98829   1 
   5  21   0 22.6027 1.95081  -2 
   5  21   0 22.6027 1.95081   1 
   6  21   1 14.2016 2.35893  -2 
  -6 -20   1 14.2016 2.35893   1 
  -6 -20   1 9.55080 3.27905   1 
  -6 -20   1 6.80369 3.44948   2 
   5  21   1 26.5778 2.23136  -2 
  -5 -20   1 26.5778 2.23136   1 
   4  21   1 92.1058 3.02837  -2 
  -4 -20   1 92.1058 3.02837   1 
   3  21   1 35.3857 2.05361  -2 
  -3 -20   1 35.3857 2.05361   1 
   2  21   1 8.28473 1.75594  -2 
  -2 -20   1 8.28473 1.75594   1 
   1  21   1 6.75417 1.77300  -2 
  -1 -20   1 6.75417 1.77300   1 
   0  21   1 0.78552 2.02951  -2 
   0 -20   1 0.78552 2.02951   1 
   1 -20   1 7.93636 1.32583   1 
   1 -20   1 8.53471 1.27793   2 
  -8 -19   1 9.33477 1.23787   1 
  -8 -19   1 10.3295 1.24162   2 
   7  20   1 16.3479 1.98898  -2 
  -7 -19   1 16.3479 1.98898   1 
   6  20   1 164.545 4.09485  -2 
  -6 -19   1 164.545 4.09485   1 
   5  20   1 147.076 3.55977  -2 
  -5 -19   1 147.076 3.55977   1 
   4  20   1 10.3282 1.61715  -2 
  -4 -19   1 10.3282 1.61715   1 
   3  20   1 19.7249 1.70474  -2 
  -3 -19   1 19.7249 1.70474   1 
   2  20   1 109.264 2.82528  -2 
  -2 -19   1 109.264 2.82528   1 
   1  20   1 -0.4383 1.70048  -2 
  -1 -19   1 -0.4383 1.70048   1 
   0  20   1 119.818 3.23278  -2 
   0 -19   1 119.818 3.23278   1 
  -1  20   1 57.7683 2.59729  -2 
   1 -19   1 57.7683 2.59729   1 
  -2  20   1 64.6441 3.24793  -2 
   2 -19   1 64.6441 3.24793   1 
   3 -19   1 -0.1323 1.10032   2 
   3 -19   1 3.41871 1.44210   1 
   9  19   1 28.2876 2.55604  -2 
  -9 -18   1 28.2876 2.55604   1 
  -9 -18   1 8.46085 3.57446   2 
  -9 -18   1 9.45902 3.87168   1 
   8  19   1 10.8674 1.77696  -2 
  -8 -18   1 10.8674 1.77696   1 
   7  19   1 155.048 3.67364  -2 
  -7 -18   1 155.048 3.67364   1 
   6  19   1 102.101 2.68931  -2 
  -6 -18   1 102.101 2.68931   1 
   5  19   1 68.7258 2.26400  -2 
  -5 -18   1 68.7258 2.26400   1 
   4  19   1 135.654 3.09993  -2 
  -4 -18   1 135.654 3.09993   1 
   3  19   1 69.2278 2.23234  -2 
  -3 -18   1 69.2278 2.23234   1 
   2  19   1 5.71195 1.46694  -2 
  -2 -18   1 5.71195 1.46694   1 
   1  19   1 86.3994 2.49036  -2 
  -1 -18   1 86.3994 2.49036   1 
   0  19   1 4.77820 1.64191  -2 
   0 -18   1 4.77820 1.64191   1 
  -1  19   1 155.557 3.66260  -2 
   1 -18   1 155.557 3.66260   1 
  -2  19   1 99.8632 3.15409  -2 
   2 -18   1 99.8632 3.15409   1 
  -3  19   1 137.490 3.83090  -2 
   3 -18   1 137.490 3.83090   1 
  -4  19   1 4.20335 2.41704  -2 
   4 -18   1 4.20335 2.41704   1 
 -10 -17   1 0.76763 0.90978   2 
 -10 -17   1 0.82237 1.01841   1 
   9  18   1 44.9668 2.24261  -2 
  -9 -17   1 44.9668 2.24261   1 
   8  18   1 45.4754 2.12516  -2 
  -8 -17   1 45.4754 2.12516   1 
   7  18   1 27.8985 1.73928  -2 
  -7 -17   1 27.8985 1.73928   1 
   6  18   1 227.568 4.32105  -2 
  -6 -17   1 227.568 4.32105   1 
   5  18   1 155.607 3.28990  -2 
  -5 -17   1 155.607 3.28990   1 
   4  18   1 9.87747 1.38253  -2 
  -4 -17   1 9.87747 1.38253   1 
   3  18   1 32.4326 1.63877  -2 
  -3 -17   1 32.4326 1.63877   1 
   2  18   1 51.6177 1.89281  -2 
  -2 -17   1 51.6177 1.89281   1 
   1  18   1 16.4768 1.59831  -2 
  -1 -17   1 16.4768 1.59831   1 
   0  18   1 202.960 4.19624  -2 
   0 -17   1 202.960 4.19624   1 
  -1  18   1 85.3702 2.78499  -2 
   1 -17   1 85.3702 2.78499   1 
  -2  18   1 50.9382 2.35946  -2 
   2 -17   1 50.9382 2.35946   1 
  -3  18   1 26.0764 1.98261  -2 
   3 -17   1 26.0764 1.98261   1 
  -4  18   1 98.8839 3.03001  -2 
   4 -17   1 98.8839 3.03001   1 
  -5  18   1 11.4553 2.51598  -2 
   5 -17   1 11.4553 2.51598   1 
  10  17   1 26.5743 2.00815  -2 
 -10 -16   1 26.5743 2.00815   1 
   9  17   1 26.9602 1.97453  -2 
  -9 -16   1 26.9602 1.97453   1 
   8  17   1 38.5883 1.87065  -2 
  -8 -16   1 38.5883 1.87065   1 
   7  17   1 142.698 3.16492  -2 
  -7 -16   1 142.698 3.16492   1 
   6  17   1 72.6734 2.16427  -2 
  -6 -16   1 72.6734 2.16427   1 
   5  17   1 59.8782 1.95908  -2 
  -5 -16   1 59.8782 1.95908   1 
   4  17   1 7.09110 1.26462  -2 
  -4 -16   1 7.09110 1.26462   1 
   3  17   1 4.56032 1.29214  -2 
  -3 -16   1 4.56032 1.29214   1 
   2  17   1 85.4603 2.23669  -2 
  -2 -16   1 85.4603 2.23669   1 
   1  17   1 260.465 4.90101  -2 
  -1 -16   1 260.465 4.90101   1 
   0  17   1 49.0924 1.96454  -2 
   0 -16   1 49.0924 1.96454   1 
  -1  17   1 17.2270 1.72341  -2 
   1 -16   1 17.2270 1.72341   1 
  -2  17   1 81.8414 2.48918  -2 
   2 -16   1 81.8414 2.48918   1 
  -3  17   1 75.1815 2.49763  -2 
   3 -16   1 75.1815 2.49763   1 
  -4  17   1 56.4091 2.38811  -2 
   4 -16   1 56.4091 2.38811   1 
  -5  17   1 75.9591 2.90296  -2 
   5 -16   1 75.9591 2.90296   1 
  -6  17   1 0.76837 2.35250  -2 
   6 -16   1 0.76837 2.35250   1 
  11  16   1 6.82860 2.06105  -2 
 -11 -15   1 6.82860 2.06105   1 
  10  16   1 4.10634 1.77394  -2 
 -10 -15   1 4.10634 1.77394   1 
   9  16   1 50.8653 2.03612  -2 
  -9 -15   1 50.8653 2.03612   1 
   8  16   1 77.3772 2.31500  -2 
  -8 -15   1 77.3772 2.31500   1 
   7  16   1 14.2904 1.40694  -2 
  -7 -15   1 14.2904 1.40694   1 
   6  16   1 181.636 3.54580  -2 
  -6 -15   1 181.636 3.54580   1 
   5  16   1 78.7080 2.03106  -2 
  -5 -15   1 78.7080 2.03106   1 
   4  16   1 40.4138 1.52898  -2 
  -4 -15   1 40.4138 1.52898   1 
   3  16   1 83.9370 1.96259  -2 
  -3 -15   1 83.9370 1.96259   1 
   2  16   1 95.1586 2.09567  -2 
  -2 -15   1 95.1586 2.09567   1 
   1  16   1 70.0194 1.90262  -2 
  -1 -15   1 70.0194 1.90262   1 
   0  16   1 171.490 3.40581  -2 
   0 -15   1 171.490 3.40581   1 
  -1  16   1 31.1894 1.69249  -2 
   1 -15   1 31.1894 1.69249   1 
  -2  16   1 11.2158 1.50049  -2 
   2 -15   1 11.2158 1.50049   1 
  -3  16   1 115.992 2.98398  -2 
   3 -15   1 115.992 2.98398   1 
  -4  16   1 76.1431 2.50788  -2 
   4 -15   1 76.1431 2.50788   1 
  -5  16   1 9.31507 1.91420  -2 
   5 -15   1 9.31507 1.91420   1 
  -6  16   1 153.382 4.08957  -2 
   6 -15   1 153.382 4.08957   1 
  -7  16   1 58.4010 3.31852  -2 
   7 -15   1 58.4010 3.31852   1 
  11  15   1 22.2720 2.12773  -2 
 -11 -14   1 22.2720 2.12773   1 
  10  15   1 3.20661 1.49009  -2 
 -10 -14   1 3.20661 1.49009   1 
   9  15   1 41.3770 1.85576  -2 
  -9 -14   1 41.3770 1.85576   1 
   8  15   1 1.48055 1.29082  -2 
  -8 -14   1 1.48055 1.29082   1 
   7  15   1 43.8528 1.68651  -2 
  -7 -14   1 43.8528 1.68651   1 
   6  15   1 56.6849 1.75623  -2 
  -6 -14   1 56.6849 1.75623   1 
   5  15   1 7.69574 1.14396  -2 
  -5 -14   1 7.69574 1.14396   1 
   4  15   1 45.1794 1.46145  -2 
  -4 -14   1 45.1794 1.46145   1 
   3  15   1 124.442 2.36621  -2 
  -3 -14   1 124.442 2.36621   1 
   2  15   1 11.2946 1.11180  -2 
  -2 -14   1 11.2946 1.11180   1 
   1  15   1 248.543 4.07860  -2 
  -1 -14   1 248.543 4.07860   1 
   0  15   1 60.2016 1.83483  -2 
   0 -14   1 60.2016 1.83483   1 
  -1  15   1 12.3014 1.21903  -2 
   1 -14   1 12.3014 1.21903   1 
  -2  15   1 30.7156 1.49080  -2 
   2 -14   1 30.7156 1.49080   1 
  -3  15   1 93.5815 2.42671  -2 
   3 -14   1 93.5815 2.42671   1 
  -4  15   1 18.0728 1.68018  -2 
   4 -14   1 18.0728 1.68018   1 
  -5  15   1 216.205 4.48866  -2 
   5 -14   1 216.205 4.48866   1 
  -6  15   1 119.446 3.24477  -2 
   6 -14   1 119.446 3.24477   1 
  -7  15   1 72.8936 2.89721  -2 
   7 -14   1 72.8936 2.89721   1 
   8 -14   1 116.865 3.68880   1 
   8 -14   1 128.193 3.89906   2 
  12  14   1 27.7199 2.42953  -2 
 -12 -13   1 27.7199 2.42953   1 
  11  14   1 63.1761 2.73821  -2 
 -11 -13   1 63.1761 2.73821   1 
  10  14   1 64.9174 2.21924  -2 
 -10 -13   1 64.9174 2.21924   1 
   9  14   1 6.85928 1.36584  -2 
  -9 -13   1 6.85928 1.36584   1 
   8  14   1 70.3147 2.02281  -2 
  -8 -13   1 70.3147 2.02281   1 
   7  14   1 45.6721 1.66086  -2 
  -7 -13   1 45.6721 1.66086   1 
   6  14   1 113.261 2.31512  -2 
  -6 -13   1 113.261 2.31512   1 
   5  14   1 34.5146 1.33254  -2 
  -5 -13   1 34.5146 1.33254   1 
   4  14   1 282.944 4.24080  -2 
  -4 -13   1 282.944 4.24080   1 
   3  14   1 28.6459 1.18446  -2 
  -3 -13   1 28.6459 1.18446   1 
   2  14   1 71.2867 1.61308  -2 
  -2 -13   1 71.2867 1.61308   1 
   1  14   1 72.7360 1.70391  -2 
  -1 -13   1 72.7360 1.70391   1 
   0  14   1 222.409 3.70662  -2 
   0 -13   1 222.409 3.70662   1 
  -1  14   1 106.041 2.24914  -2 
   1 -13   1 106.041 2.24914   1 
  -2  14   1 199.885 3.47641  -2 
   2 -13   1 199.885 3.47641   1 
  -3  14   1 5.47360 1.21618  -2 
   3 -13   1 5.47360 1.21618   1 
  -4  14   1 27.5574 1.56500  -2 
   4 -13   1 27.5574 1.56500   1 
  -5  14   1 58.7004 2.08243  -2 
   5 -13   1 58.7004 2.08243   1 
  -6  14   1 89.7878 2.75947  -2 
   6 -13   1 89.7878 2.75947   1 
  -7  14   1 242.036 5.01590  -2 
   7 -13   1 242.036 5.01590   1 
  -8  14   1 114.719 3.59110  -2 
   8 -13   1 114.719 3.59110   1 
  12  13   1 84.3337 3.17731  -2 
 -12 -12   1 84.3337 3.17731   1 
  11  13   1 34.7533 2.23959  -2 
 -11 -12   1 34.7533 2.23959   1 
  10  13   1 17.1545 1.57101  -2 
 -10 -12   1 17.1545 1.57101   1 
   9  13   1 20.8025 1.53082  -2 
  -9 -12   1 20.8025 1.53082   1 
   8  13   1 135.834 2.80692  -2 
  -8 -12   1 135.834 2.80692   1 
   7  13   1 180.116 3.15463  -2 
  -7 -12   1 180.116 3.15463   1 
   6  13   1 175.258 3.00153  -2 
  -6 -12   1 175.258 3.00153   1 
   5  13   1 35.9931 1.26040  -2 
  -5 -12   1 35.9931 1.26040   1 
   4  13   1 16.3402 1.00533  -2 
  -4 -12   1 16.3402 1.00533   1 
   3  13   1 95.6047 1.77563  -2 
  -3 -12   1 95.6047 1.77563   1 
   2  13   1 52.1259 1.29768  -2 
  -2 -12   1 52.1259 1.29768   1 
   1  13   1 282.828 4.22203  -2 
  -1 -12   1 282.828 4.22203   1 
   0  13   1 307.155 4.45934  -2 
   0 -12   1 307.155 4.45934   1 
  -1  13   1 200.107 3.19584  -2 
   1 -12   1 200.107 3.19584   1 
  -2  13   1 5.92409 1.03570  -2 
   2 -12   1 5.92409 1.03570   1 
  -3  13   1 331.504 5.16324  -2 
   3 -12   1 331.504 5.16324   1 
  -4  13   1 74.9494 1.99753  -2 
   4 -12   1 74.9494 1.99753   1 
  -5  13   1 91.6569 2.41514  -2 
   5 -12   1 91.6569 2.41514   1 
  -6  13   1 89.1427 2.49468  -2 
   6 -12   1 89.1427 2.49468   1 
  -7  13   1 55.9409 2.34064  -2 
   7 -12   1 55.9409 2.34064   1 
  -8  13   1 21.1123 2.15440  -2 
   8 -12   1 21.1123 2.15440   1 
  -9  13   1 35.4015 2.95442  -2 
   9 -12   1 35.4015 2.95442   1 
  12  12   1 48.9529 2.53334  -2 
 -12 -11   1 48.9529 2.53334   1 
  11  12   1 3.75081 1.60616  -2 
 -11 -11   1 3.75081 1.60616   1 
  10  12   1 42.1091 1.95853  -2 
 -10 -11   1 42.1091 1.95853   1 
   9  12   1 228.596 4.05337  -2 
  -9 -11   1 228.596 4.05337   1 
   8  12   1 575.503 8.36607  -2 
  -8 -11   1 575.503 8.36607   1 
   7  12   1 573.882 7.87389  -2 
  -7 -11   1 573.882 7.87389   1 
   6  12   1 303.213 4.31508  -2 
  -6 -11   1 303.213 4.31508   1 
   5  12   1 45.9660 1.28613  -2 
  -5 -11   1 45.9660 1.28613   1 
   4  12   1 51.8169 1.27862  -2 
  -4 -11   1 51.8169 1.27862   1 
   3  12   1 15.8289 0.88007  -2 
  -3 -11   1 15.8289 0.88007   1 
   2  12   1 740.732 8.91118  -2 
  -2 -11   1 740.732 8.91118   1 
   1  12   1 282.993 4.15638  -2 
  -1 -11   1 282.993 4.15638   1 
   0  12   1 233.167 3.39030  -2 
   0 -11   1 233.167 3.39030   1 
  -1  12   1 94.6229 1.81061  -2 
   1 -11   1 94.6229 1.81061   1 
  -2  12   1 59.0806 1.51451  -2 
   2 -11   1 59.0806 1.51451   1 
  -3  12   1 4.89379 1.00518  -2 
   3 -11   1 4.89379 1.00518   1 
  -4  12   1 249.897 3.93218  -2 
   4 -11   1 249.897 3.93218   1 
  -5  12   1 3.70928 1.21110  -2 
   5 -11   1 3.70928 1.21110   1 
  -6  12   1 30.0387 1.68430  -2 
   6 -11   1 30.0387 1.68430   1 
  -7  12   1 82.2860 2.48234  -2 
   7 -11   1 82.2860 2.48234   1 
  -8  12   1 116.739 3.23111  -2 
   8 -11   1 116.739 3.23111   1 
  -9  12   1 1.98683 2.34841  -2 
   9 -11   1 1.98683 2.34841   1 
  10 -11   1 58.0744 6.67422   1 
  13  11   1 12.7847 2.42148  -2 
 -13 -10   1 12.7847 2.42148   1 
  12  11   1 18.6337 2.04187  -2 
 -12 -10   1 18.6337 2.04187   1 
  11  11   1 13.1232 1.76531  -2 
 -11 -10   1 13.1232 1.76531   1 
  10  11   1 209.821 4.65644  -2 
 -10 -10   1 209.821 4.65644   1 
   9  11   1 491.516 7.34992  -2 
  -9 -10   1 491.516 7.34992   1 
   8  11   1 474.823 6.71396  -2 
  -8 -10   1 474.823 6.71396   1 
   7  11   1 241.203 3.79841  -2 
  -7 -10   1 241.203 3.79841   1 
   6  11   1 307.459 4.18435  -2 
  -6 -10   1 307.459 4.18435   1 
   5  11   1 140.312 2.25262  -2 
  -5 -10   1 140.312 2.25262   1 
   4  11   1 364.905 4.51799  -2 
  -4 -10   1 364.905 4.51799   1 
   3  11   1 745.763 8.59666  -2 
  -3 -10   1 745.763 8.59666   1 
   2  11   1 126.357 1.90603  -2 
  -2 -10   1 126.357 1.90603   1 
   1  11   1 212.838 2.98656  -2 
  -1 -10   1 212.838 2.98656   1 
   0  11   1 422.311 5.30324  -2 
   0 -10   1 422.311 5.30324   1 
  -1  11   1 384.815 4.90511  -2 
   1 -10   1 384.815 4.90511   1 
  -2  11   1 197.826 2.98850  -2 
   2 -10   1 197.826 2.98850   1 
  -3  11   1 797.806 10.4725  -2 
   3 -10   1 797.806 10.4725   1 
  -4  11   1 40.7728 1.38589  -2 
   4 -10   1 40.7728 1.38589   1 
  -5  11   1 114.204 2.34714  -2 
   5 -10   1 114.204 2.34714   1 
  -6  11   1 130.214 2.87971  -2 
   6 -10   1 130.214 2.87971   1 
  -7  11   1 341.790 5.85056  -2 
   7 -10   1 341.790 5.85056   1 
  -8  11   1 12.4818 1.78499  -2 
   8 -10   1 12.4818 1.78499   1 
  -9  11   1 45.2483 2.66706  -2 
   9 -10   1 45.2483 2.66706   1 
 -10  11   1 12.6140 2.54323  -2 
  10 -10   1 12.6140 2.54323   1 
  13  10   1 23.3202 2.24845  -2 
 -13  -9   1 23.3202 2.24845   1 
  12  10   1 99.9435 3.38326  -2 
 -12  -9   1 99.9435 3.38326   1 
  11  10   1 57.7317 2.35060  -2 
 -11  -9   1 57.7317 2.35060   1 
  10  10   1 259.320 5.08422  -2 
 -10  -9   1 259.320 5.08422   1 
   9  10   1 106.164 2.57276  -2 
  -9  -9   1 106.164 2.57276   1 
   8  10   1 117.558 2.35645  -2 
  -8  -9   1 117.558 2.35645   1 
   7  10   1 289.043 4.14614  -2 
  -7  -9   1 289.043 4.14614   1 
   6  10   1 345.059 4.57325  -2 
  -6  -9   1 345.059 4.57325   1 
   5  10   1 152.354 2.25186  -2 
  -5  -9   1 152.354 2.25186   1 
   4  10   1 1153.57 13.0154  -2 
  -4  -9   1 1153.57 13.0154   1 
   3  10   1 194.567 2.40894  -2 
  -3  -9   1 194.567 2.40894   1 
   2  10   1 473.506 5.23845  -2 
  -2  -9   1 473.506 5.23845   1 
   1  10   1 419.191 4.96131  -2 
  -1  -9   1 419.191 4.96131   1 
   0  10   1 502.091 5.75166  -2 
   0  -9   1 502.091 5.75166   1 
  -1  10   1 35.6813 0.96472  -2 
   1  -9   1 35.6813 0.96472   1 
  -2  10   1 182.715 2.55208  -2 
   2  -9   1 182.715 2.55208   1 
  -3  10   1 89.1186 1.73807  -2 
   3  -9   1 89.1186 1.73807   1 
  -4  10   1 846.030 11.0908  -2 
   4  -9   1 846.030 11.0908   1 
  -5  10   1 158.012 2.78388  -2 
   5  -9   1 158.012 2.78388   1 
  -6  10   1 32.4790 1.51316  -2 
   6  -9   1 32.4790 1.51316   1 
  -7  10   1 73.0463 2.21650  -2 
   7  -9   1 73.0463 2.21650   1 
  -8  10   1 130.142 3.09836  -2 
   8  -9   1 130.142 3.09836   1 
  -9  10   1 37.2321 2.17072  -2 
   9  -9   1 37.2321 2.17072   1 
 -10  10   1 133.009 4.56252  -2 
  10  -9   1 133.009 4.56252   1 
  13   9   1 -0.1297 1.98331  -2 
 -13  -8   1 -0.1297 1.98331   1 
  12   9   1 16.5568 1.89421  -2 
 -12  -8   1 16.5568 1.89421   1 
  11   9   1 8.82370 1.64703  -2 
 -11  -8   1 8.82370 1.64703   1 
  10   9   1 58.4737 2.13060  -2 
 -10  -8   1 58.4737 2.13060   1 
   9   9   1 148.128 3.29325  -2 
  -9  -8   1 148.128 3.29325   1 
   8   9   1 41.7071 1.43445  -2 
  -8  -8   1 41.7071 1.43445   1 
   7   9   1 90.1905 1.78450  -2 
  -7  -8   1 90.1905 1.78450   1 
   6   9   1 28.7947 1.01222  -2 
  -6  -8   1 28.7947 1.01222   1 
   5   9   1 69.1279 1.34476  -2 
  -5  -8   1 69.1279 1.34476   1 
   4   9   1 394.138 4.39149  -2 
  -4  -8   1 394.138 4.39149   1 
   3   9   1 845.843 8.72042  -2 
  -3  -8   1 845.843 8.72042   1 
   2   9   1 55.2084 0.95864  -2 
  -2  -8   1 55.2084 0.95864   1 
   1   9   1 733.172 8.29409  -2 
  -1  -8   1 733.172 8.29409   1 
   0   9   1 204.673 2.51200  -2 
   0  -8   1 204.673 2.51200   1 
  -1   9   1 225.162 2.75355  -2 
   1  -8   1 225.162 2.75355   1 
  -2   9   1 18.0902 0.73685  -2 
   2  -8   1 18.0902 0.73685   1 
  -3   9   1 912.519 10.5359  -2 
   3  -8   1 912.519 10.5359   1 
  -4   9   1 333.820 4.60436  -2 
   4  -8   1 333.820 4.60436   1 
  -5   9   1 364.642 5.25030  -2 
   5  -8   1 364.642 5.25030   1 
  -6   9   1 79.0807 1.91710  -2 
   6  -8   1 79.0807 1.91710   1 
  -7   9   1 37.3534 1.61268  -2 
   7  -8   1 37.3534 1.61268   1 
  -8   9   1 152.886 3.35164  -2 
   8  -8   1 152.886 3.35164   1 
  -9   9   1 67.8080 2.36142  -2 
   9  -8   1 67.8080 2.36142   1 
 -10   9   1 30.0497 2.26008  -2 
  10  -8   1 30.0497 2.26008   1 
 -11   9   1 34.0182 2.64026  -2 
  11  -8   1 34.0182 2.64026   1 
  13   8   1 -2.0080 1.63300  -2 
 -13  -7   1 -2.0080 1.63300   1 
  12   8   1 19.0289 1.94469  -2 
 -12  -7   1 19.0289 1.94469   1 
  11   8   1 54.3021 2.31291  -2 
 -11  -7   1 54.3021 2.31291   1 
  10   8   1 328.143 6.04020  -2 
 -10  -7   1 328.143 6.04020   1 
   9   8   1 5.79593 1.22021  -2 
  -9  -7   1 5.79593 1.22021   1 
   8   8   1 71.4443 1.76655  -2 
  -8  -7   1 71.4443 1.76655   1 
   7   8   1 13.7634 0.95874  -2 
  -7  -7   1 13.7634 0.95874   1 
   6   8   1 102.159 1.73046  -2 
  -6  -7   1 102.159 1.73046   1 
   5   8   1 59.0009 1.12416  -2 
  -5  -7   1 59.0009 1.12416   1 
   4   8   1 709.424 7.51494  -2 
  -4  -7   1 709.424 7.51494   1 
   3   8   1 154.223 1.97838  -2 
  -3  -7   1 154.223 1.97838   1 
   2   8   1 83.8621 1.21795  -2 
  -2  -7   1 83.8621 1.21795   1 
   1   8   1 278.532 3.45546  -2 
  -1  -7   1 278.532 3.45546   1 
   0   8   1 330.858 3.80847  -2 
   0  -7   1 330.858 3.80847   1 
  -1   8   1 317.723 3.66315  -2 
   1  -7   1 317.723 3.66315   1 
  -2   8   1 72.1015 1.18023  -2 
   2  -7   1 72.1015 1.18023   1 
  -3   8   1 84.2456 1.38647  -2 
   3  -7   1 84.2456 1.38647   1 
  -4   8   1 303.335 3.90446  -2 
   4  -7   1 303.335 3.90446   1 
  -5   8   1 161.975 2.65759  -2 
   5  -7   1 161.975 2.65759   1 
  -6   8   1 162.731 2.84272  -2 
   6  -7   1 162.731 2.84272   1 
  -7   8   1 173.269 3.09452  -2 
   7  -7   1 173.269 3.09452   1 
  -8   8   1 33.1529 1.72903  -2 
   8  -7   1 33.1529 1.72903   1 
  -9   8   1 -0.1253 1.51070  -2 
   9  -7   1 -0.1253 1.51070   1 
 -10   8   1 239.711 5.04698  -2 
  10  -7   1 239.711 5.04698   1 
 -11   8   1 71.5725 3.21230  -2 
  11  -7   1 71.5725 3.21230   1 
  13   7   1 0.60209 1.98816  -2 
 -13  -6   1 0.60209 1.98816   1 
  12   7   1 12.4501 1.87665  -2 
 -12  -6   1 12.4501 1.87665   1 
  11   7   1 132.040 3.48943  -2 
 -11  -6   1 132.040 3.48943   1 
  10   7   1 70.4674 2.30616  -2 
 -10  -6   1 70.4674 2.30616   1 
   9   7   1 101.651 2.44969  -2 
  -9  -6   1 101.651 2.44969   1 
   8   7   1 40.1303 1.39901  -2 
  -8  -6   1 40.1303 1.39901   1 
   7   7   1 27.3008 1.02198  -2 
  -7  -6   1 27.3008 1.02198   1 
   6   7   1 129.410 2.00145  -2 
  -6  -6   1 129.410 2.00145   1 
   5   7   1 27.2447 0.80058  -2 
  -5  -6   1 27.2447 0.80058   1 
   4   7   1 5.92688 0.55971  -2 
  -4  -6   1 5.92688 0.55971   1 
   3   7   1 550.518 5.98853  -2 
  -3  -6   1 550.518 5.98853   1 
   2   7   1 7.23482 0.48514  -2 
  -2  -6   1 7.23482 0.48514   1 
   1   7   1 903.647 10.3480  -2 
  -1  -6   1 903.647 10.3480   1 
   0   7   1 103.585 1.39956  -2 
   0  -6   1 103.585 1.39956   1 
  -1   7   1 647.834 7.10796  -2 
   1  -6   1 647.834 7.10796   1 
  -2   7   1 347.791 3.96466  -2 
   2  -6   1 347.791 3.96466   1 
  -3   7   1 148.242 1.96727  -2 
   3  -6   1 148.242 1.96727   1 
  -4   7   1 204.880 2.66484  -2 
   4  -6   1 204.880 2.66484   1 
  -5   7   1 702.429 8.95180  -2 
   5  -6   1 702.429 8.95180   1 
  -6   7   1 124.974 2.37630  -2 
   6  -6   1 124.974 2.37630   1 
  -7   7   1 115.261 2.35171  -2 
   7  -6   1 115.261 2.35171   1 
  -8   7   1 10.4129 1.33504  -2 
   8  -6   1 10.4129 1.33504   1 
  -9   7   1 14.8838 1.59612  -2 
   9  -6   1 14.8838 1.59612   1 
 -10   7   1 115.111 3.01471  -2 
  10  -6   1 115.111 3.01471   1 
 -11   7   1 102.262 3.36541  -2 
  11  -6   1 102.262 3.36541   1 
 -12   7   1 128.271 4.49882  -2 
  12  -6   1 128.271 4.49882   1 
  13   6   1 34.4641 2.46512  -2 
 -13  -5   1 34.4641 2.46512   1 
  12   6   1 4.76841 1.78673  -2 
 -12  -5   1 4.76841 1.78673   1 
  11   6   1 61.6372 2.28536  -2 
 -11  -5   1 61.6372 2.28536   1 
  10   6   1 384.914 6.84196  -2 
 -10  -5   1 384.914 6.84196   1 
   9   6   1 195.907 3.72537  -2 
  -9  -5   1 195.907 3.72537   1 
   8   6   1 18.1350 1.15499  -2 
  -8  -5   1 18.1350 1.15499   1 
   7   6   1 124.348 2.19366  -2 
  -7  -5   1 124.348 2.19366   1 
   6   6   1 365.033 4.32104  -2 
  -6  -5   1 365.033 4.32104   1 
   5   6   1 214.117 2.65777  -2 
  -5  -5   1 214.117 2.65777   1 
   4   6   1 119.510 1.63244  -2 
  -4  -5   1 119.510 1.63244   1 
   3   6   1 157.574 1.95361  -2 
  -3  -5   1 157.574 1.95361   1 
   2   6   1 33.4070 0.72943  -2 
  -2  -5   1 33.4070 0.72943   1 
   1   6   1 103.404 1.53982  -2 
  -1  -5   1 103.404 1.53982   1 
   0   6   1 255.927 3.16980  -2 
   0  -5   1 255.927 3.16980   1 
  -1   6   1 190.921 2.28236  -2 
   1  -5   1 190.921 2.28236   1 
  -2   6   1 487.898 5.42638  -2 
   2  -5   1 487.898 5.42638   1 
  -3   6   1 17.1746 0.63954  -2 
   3  -5   1 17.1746 0.63954   1 
  -4   6   1 219.873 2.74469  -2 
   4  -5   1 219.873 2.74469   1 
  -5   6   1 304.367 3.92067  -2 
   5  -5   1 304.367 3.92067   1 
  -6   6   1 378.247 5.20239  -2 
   6  -5   1 378.247 5.20239   1 
  -7   6   1 31.7648 1.36153  -2 
   7  -5   1 31.7648 1.36153   1 
  -8   6   1 247.125 4.02362  -2 
   8  -5   1 247.125 4.02362   1 
  -9   6   1 44.1902 1.88138  -2 
   9  -5   1 44.1902 1.88138   1 
 -10   6   1 131.937 3.18877  -2 
  10  -5   1 131.937 3.18877   1 
 -11   6   1 64.1570 2.77145  -2 
  11  -5   1 64.1570 2.77145   1 
 -12   6   1 127.302 4.53236  -2 
  12  -5   1 127.302 4.53236   1 
  13   5   1 12.5418 2.06520  -2 
 -13  -4   1 12.5418 2.06520   1 
  12   5   1 -3.1216 1.72067  -2 
 -12  -4   1 -3.1216 1.72067   1 
  11   5   1 151.773 3.78374  -2 
 -11  -4   1 151.773 3.78374   1 
  10   5   1 407.885 7.17832  -2 
 -10  -4   1 407.885 7.17832   1 
   9   5   1 55.2883 1.82130  -2 
  -9  -4   1 55.2883 1.82130   1 
   8   5   1 21.9831 1.20255  -2 
  -8  -4   1 21.9831 1.20255   1 
   7   5   1 89.7647 1.79423  -2 
  -7  -4   1 89.7647 1.79423   1 
   6   5   1 306.756 3.86891  -2 
  -6  -4   1 306.756 3.86891   1 
   5   5   1 80.3872 1.29642  -2 
  -5  -4   1 80.3872 1.29642   1 
   4   5   1 672.240 7.25633  -2 
  -4  -4   1 672.240 7.25633   1 
   3   5   1 642.253 7.40560  -2 
  -3  -4   1 642.253 7.40560   1 
   2   5   1 258.558 3.11872  -2 
  -2  -4   1 258.558 3.11872   1 
   1   5   1 36.9403 0.76514  -2 
  -1  -4   1 36.9403 0.76514   1 
   0   5   1 273.639 3.42776  -2 
   0  -4   1 273.639 3.42776   1 
  -1   5   1 132.373 1.75760  -2 
   1  -4   1 132.373 1.75760   1 
  -2   5   1 163.818 1.99950  -2 
   2  -4   1 163.818 1.99950   1 
  -3   5   1 349.619 4.08064  -2 
   3  -4   1 349.619 4.08064   1 
  -4   5   1 204.374 2.54782  -2 
   4  -4   1 204.374 2.54782   1 
  -5   5   1 583.887 6.68930  -2 
   5  -4   1 583.887 6.68930   1 
  -6   5   1 121.340 2.17186  -2 
   6  -4   1 121.340 2.17186   1 
  -7   5   1 522.138 7.21662  -2 
   7  -4   1 522.138 7.21662   1 
  -8   5   1 43.4193 1.56378  -2 
   8  -4   1 43.4193 1.56378   1 
  -9   5   1 35.6521 1.71106  -2 
   9  -4   1 35.6521 1.71106   1 
 -10   5   1 4.22108 1.49255  -2 
  10  -4   1 4.22108 1.49255   1 
 -11   5   1 4.93251 1.90380  -2 
  11  -4   1 4.93251 1.90380   1 
 -12   5   1 6.41935 2.22320  -2 
  12  -4   1 6.41935 2.22320   1 
  13   4   1 -1.9562 2.25113  -2 
 -13  -3   1 -1.9562 2.25113   1 
  12   4   1 6.59790 1.70374  -2 
 -12  -3   1 6.59790 1.70374   1 
  11   4   1 416.520 7.44129  -2 
 -11  -3   1 416.520 7.44129   1 
  10   4   1 409.332 7.69202  -2 
 -10  -3   1 409.332 7.69202   1 
   9   4   1 145.483 3.03510  -2 
  -9  -3   1 145.483 3.03510   1 
   8   4   1 23.5769 1.21283  -2 
  -8  -3   1 23.5769 1.21283   1 
   7   4   1 86.7277 1.74768  -2 
  -7  -3   1 86.7277 1.74768   1 
   6   4   1 357.678 4.42082  -2 
  -6  -3   1 357.678 4.42082   1 
   5   4   1 478.729 5.79467  -2 
  -5  -3   1 478.729 5.79467   1 
   4   4   1 1466.65 16.5621  -2 
  -4  -3   1 1466.65 16.5621   1 
   3   4   1 1060.83 12.0022  -2 
  -3  -3   1 1060.83 12.0022   1 
   2   4   1 569.782 7.00884  -2 
  -2  -3   1 569.782 7.00884   1 
   1   4   1 1997.71 25.9819  -2 
  -1  -3   1 1997.71 25.9819   1 
   0   4   1 1655.08 22.2982  -2 
   0  -3   1 1655.08 22.2982   1 
  -1   4   1 580.672 7.31597  -2 
   1  -3   1 580.672 7.31597   1 
  -2   4   1 655.024 7.68389  -2 
   2  -3   1 655.024 7.68389   1 
  -3   4   1 468.568 5.22600  -2 
   3  -3   1 468.568 5.22600   1 
  -4   4   1 393.475 4.48050  -2 
   4  -3   1 393.475 4.48050   1 
  -5   4   1 763.388 8.40478  -2 
   5  -3   1 763.388 8.40478   1 
  -6   4   1 1090.35 13.1132  -2 
   6  -3   1 1090.35 13.1132   1 
  -7   4   1 83.5465 2.01861  -2 
   7  -3   1 83.5465 2.01861   1 
  -8   4   1 116.591 2.37387  -2 
   8  -3   1 116.591 2.37387   1 
  -9   4   1 36.4892 1.62265  -2 
   9  -3   1 36.4892 1.62265   1 
 -10   4   1 53.4584 2.05202  -2 
  10  -3   1 53.4584 2.05202   1 
 -11   4   1 40.5832 2.08078  -2 
  11  -3   1 40.5832 2.08078   1 
 -12   4   1 240.633 5.47192  -2 
  12  -3   1 240.633 5.47192   1 
  13   3   1 89.8546 3.21909  -2 
 -13  -2   1 89.8546 3.21909   1 
  12   3   1 68.5801 2.53291  -2 
 -12  -2   1 68.5801 2.53291   1 
  11   3   1 156.658 3.42197  -2 
 -11  -2   1 156.658 3.42197   1 
  10   3   1 298.477 5.56896  -2 
 -10  -2   1 298.477 5.56896   1 
   9   3   1 3.91949 1.25979  -2 
  -9  -2   1 3.91949 1.25979   1 
   8   3   1 57.3826 1.61788  -2 
  -8  -2   1 57.3826 1.61788   1 
   7   3   1 170.225 2.72057  -2 
  -7  -2   1 170.225 2.72057   1 
   6   3   1 146.033 2.13932  -2 
  -6  -2   1 146.033 2.13932   1 
   5   3   1 292.007 3.71681  -2 
  -5  -2   1 292.007 3.71681   1 
   4   3   1 626.967 8.04507  -2 
  -4  -2   1 626.967 8.04507   1 
   3   3   1 833.656 11.4942  -2 
  -3  -2   1 833.656 11.4942   1 
  -3  -2   1 388.571 8.09158   1 
  -3  -2   1 394.850 7.21746   2 
  -2  -2   1 1215.54 18.6163   2 
  -2  -2   1 1190.23 17.1175   1 
   2   3   1 1217.17 48.6186  -2 
  -2  -2   1 1217.17 48.6186   1 
   1   3   1 4016.69 89.0224  -2 
  -1  -2   1 4016.69 89.0224   1 
  -1  -2   1 13.1949 1.21248   2 
   0   3   1 425.199 5.99704  -2 
   0  -2   1 425.199 5.99704   1 
  -1   3   1 1193.97 19.1515  -2 
   1  -2   1 1193.97 19.1515   1 
   1  -2   1 175.437 5.20651   1 
   2  -2   1 418.852 11.7718   1 
  -2   3   1 555.231 7.48387  -2 
   2  -2   1 555.231 7.48387   1 
  -3   3   1 938.702 10.1330  -2 
   3  -2   1 938.702 10.1330   1 
  -4   3   1 390.805 4.93126  -2 
   4  -2   1 390.805 4.93126   1 
  -5   3   1 934.259 10.9491  -2 
   5  -2   1 934.259 10.9491   1 
  -6   3   1 431.818 5.55927  -2 
   6  -2   1 431.818 5.55927   1 
  -7   3   1 162.761 3.00600  -2 
   7  -2   1 162.761 3.00600   1 
  -8   3   1 96.8060 2.37471  -2 
   8  -2   1 96.8060 2.37471   1 
  -9   3   1 532.700 8.42464  -2 
   9  -2   1 532.700 8.42464   1 
 -10   3   1 125.018 3.12169  -2 
  10  -2   1 125.018 3.12169   1 
 -11   3   1 81.9253 2.57355  -2 
  11  -2   1 81.9253 2.57355   1 
 -12   3   1 23.3880 2.21795  -2 
  12  -2   1 23.3880 2.21795   1 
 -13   3   1 23.4934 2.48320  -2 
  13  -2   1 23.4934 2.48320   1 
  13   2   1 46.1087 2.56825  -2 
 -13  -1   1 46.1087 2.56825   1 
  12   2   1 8.11434 1.75865  -2 
 -12  -1   1 8.11434 1.75865   1 
  11   2   1 92.7147 2.58711  -2 
 -11  -1   1 92.7147 2.58711   1 
  10   2   1 103.060 2.58392  -2 
 -10  -1   1 103.060 2.58392   1 
   9   2   1 40.7490 1.56550  -2 
  -9  -1   1 40.7490 1.56550   1 
   8   2   1 103.666 2.17455  -2 
  -8  -1   1 103.666 2.17455   1 
   7   2   1 10.4458 1.00587  -2 
  -7  -1   1 10.4458 1.00587   1 
   6   2   1 139.504 2.06309  -2 
  -6  -1   1 139.504 2.06309   1 
   5   2   1 99.3699 1.59234  -2 
  -5  -1   1 99.3699 1.59234   1 
   4   2   1 39.7585 0.97452  -2 
  -4  -1   1 39.7585 0.97452   1 
  -3  -1   1 184.472 2.88896   2 
  -3  -1   1 182.308 2.50994   1 
  -2  -1   1 19.3849 0.48387   2 
  -2  -1   1 18.3526 0.49161   1 
  -1  -1   1 1117.48 14.8927   1 
  -1  -1   1 1114.72 15.2544   2 
   0   2   1 402.012 7.07216  -2 
   0  -1   1 402.012 7.07216   1 
   0  -1   1 73.9348 2.18644   1 
   1  -1   1 163.973 2.75708   2 
   1  -1   1 161.481 2.62267   1 
  -1   2   1 213.007 8.62351  -2 
   1  -1   1 213.007 8.62351   1 
   2  -1   1 536.428 8.05087   2 
  -2   2   1 617.030 15.6721  -2 
   2  -1   1 617.030 15.6721   1 
   2  -1   1 540.729 8.75444   1 
  -3   2   1 735.992 8.61229  -2 
   3  -1   1 735.992 8.61229   1 
  -4   2   1 1018.13 11.2387  -2 
   4  -1   1 1018.13 11.2387   1 
  -5   2   1 563.173 6.29564  -2 
   5  -1   1 563.173 6.29564   1 
  -6   2   1 177.407 2.43536  -2 
   6  -1   1 177.407 2.43536   1 
  -7   2   1 56.5234 1.44943  -2 
   7  -1   1 56.5234 1.44943   1 
  -8   2   1 445.463 6.63573  -2 
   8  -1   1 445.463 6.63573   1 
  -9   2   1 212.614 4.05757  -2 
   9  -1   1 212.614 4.05757   1 
 -10   2   1 266.597 5.59834  -2 
  10  -1   1 266.597 5.59834   1 
 -11   2   1 77.8434 2.86428  -2 
  11  -1   1 77.8434 2.86428   1 
 -12   2   1 100.121 3.28512  -2 
  12  -1   1 100.121 3.28512   1 
 -13   2   1 37.6823 2.52472  -2 
  13  -1   1 37.6823 2.52472   1 
  13   1   1 1.87634 2.16509  -2 
 -13   0   1 1.87634 2.16509   1 
  12   1   1 15.1172 1.82153  -2 
 -12   0   1 15.1172 1.82153   1 
  11   1   1 202.569 4.28687  -2 
 -11   0   1 202.569 4.28687   1 
  10   1   1 165.928 3.43741  -2 
 -10   0   1 165.928 3.43741   1 
   9   1   1 4.57050 1.16918  -2 
  -9   0   1 4.57050 1.16918   1 
   8   1   1 202.982 3.22619  -2 
  -8   0   1 202.982 3.22619   1 
   7   1   1 153.340 2.51893  -2 
  -7   0   1 153.340 2.51893   1 
   6   1   1 66.7289 1.35491  -2 
  -6   0   1 66.7289 1.35491   1 
   5   1   1 176.198 2.52719  -2 
  -5   0   1 176.198 2.52719   1 
   4   1   1 204.314 2.90285  -2 
  -4   0   1 204.314 2.90285   1 
   3   1   1 136.319 5.00819  -2 
  -3   0   1 136.319 5.00819   1 
  -3   0   1 55.1904 1.06185   1 
  -3   0   1 56.7398 1.17521   2 
  -2   0   1 54.0294 0.95357   1 
  -2   0   1 53.7906 1.00693   2 
  -1   0   1 72.3398 1.12503   1 
  -1   0   1 76.1783 1.23868   2 
   1   0   1 20.8209 0.45478   2 
   1   0   1 21.4576 0.45382   1 
   2   0   1 81.0196 1.27862   1 
   2   0   1 82.5084 1.24901   2 
  -3   1   1 777.393 18.0982  -2 
   3   0   1 777.393 18.0982   1 
   3   0   1 9.66433 1.49950   2 
  -4   1   1 182.347 2.27607  -2 
   4   0   1 182.347 2.27607   1 
  -5   1   1 162.881 2.15071  -2 
   5   0   1 162.881 2.15071   1 
  -6   1   1 316.223 3.82007  -2 
   6   0   1 316.223 3.82007   1 
  -7   1   1 49.5129 1.33927  -2 
   7   0   1 49.5129 1.33927   1 
  -8   1   1 188.933 3.19692  -2 
   8   0   1 188.933 3.19692   1 
  -9   1   1 98.5097 2.22606  -2 
   9   0   1 98.5097 2.22606   1 
 -10   1   1 116.397 3.23455  -2 
  10   0   1 116.397 3.23455   1 
 -11   1   1 33.7842 2.15980  -2 
  11   0   1 33.7842 2.15980   1 
 -12   1   1 215.722 5.57518  -2 
  12   0   1 215.722 5.57518   1 
 -13   1   1 35.9066 2.46961  -2 
  13   0   1 35.9066 2.46961   1 
  13   0   1 43.4211 2.82596  -2 
 -13   1   1 43.4211 2.82596   1 
  12   0   1 212.031 5.04007  -2 
 -12   1   1 212.031 5.04007   1 
  11   0   1 32.0045 1.91179  -2 
 -11   1   1 32.0045 1.91179   1 
  10   0   1 115.423 2.76084  -2 
 -10   1   1 115.423 2.76084   1 
   9   0   1 97.8926 2.29194  -2 
  -9   1   1 97.8926 2.29194   1 
   8   0   1 186.051 3.05047  -2 
  -8   1   1 186.051 3.05047   1 
   7   0   1 52.3194 1.33648  -2 
  -7   1   1 52.3194 1.33648   1 
   6   0   1 314.389 3.79149  -2 
  -6   1   1 314.389 3.79149   1 
   5   0   1 162.640 2.27595  -2 
  -5   1   1 162.640 2.27595   1 
   4   0   1 177.024 2.56203  -2 
  -4   1   1 177.024 2.56203   1 
  -3   1   1 753.661 10.6520   2 
  -3   1   1 768.894 12.8301   1 
   3   0   1 748.553 14.1012  -2 
  -3   1   1 748.553 14.1012   1 
  -2   1   1 163.428 2.37616   1 
  -2   1   1 163.784 2.34143   2 
  -1   1   1 357.551 5.99429   1 
  -1   1   1 364.739 5.45457   2 
   0   0   1 66.5978 2.79558  -2 
   0   1   1 66.5978 2.79558   1 
   0   1   1 34.8809 0.83231   2 
   0   1   1 39.6194 1.13617   1 
   1   1   1 587.658 8.70252   1 
   1   1   1 579.823 8.22079   2 
   2   1   1 1.74342 0.28785   2 
   2   1   1 1.64152 0.32260   1 
   3   1   1 78.3399 1.39711   1 
   3   1   1 77.8817 1.36101   2 
  -3   0   1 132.307 3.83521  -2 
   3   1   1 132.307 3.83521   1 
  -4   0   1 209.006 2.76281  -2 
   4   1   1 209.006 2.76281   1 
  -5   0   1 177.169 2.57589  -2 
   5   1   1 177.169 2.57589   1 
  -6   0   1 67.3467 1.37173  -2 
   6   1   1 67.3467 1.37173   1 
  -7   0   1 152.504 2.45764  -2 
   7   1   1 152.504 2.45764   1 
  -8   0   1 207.397 3.41196  -2 
   8   1   1 207.397 3.41196   1 
  -9   0   1 2.06575 1.11507  -2 
   9   1   1 2.06575 1.11507   1 
 -10   0   1 160.856 3.40471  -2 
  10   1   1 160.856 3.40471   1 
 -11   0   1 195.690 4.00259  -2 
  11   1   1 195.690 4.00259   1 
 -12   0   1 7.19448 2.16091  -2 
  12   1   1 7.19448 2.16091   1 
 -13   0   1 8.77838 2.37060  -2 
  13   1   1 8.77838 2.37060   1 
  13  -1   1 36.5263 2.73452  -2 
 -13   2   1 36.5263 2.73452   1 
  12  -1   1 98.1035 3.60506  -2 
 -12   2   1 98.1035 3.60506   1 
  11  -1   1 76.7890 2.78833  -2 
 -11   2   1 76.7890 2.78833   1 
  10  -1   1 265.293 4.81857  -2 
 -10   2   1 265.293 4.81857   1 
   9  -1   1 211.676 3.76276  -2 
  -9   2   1 211.676 3.76276   1 
   8  -1   1 445.752 6.10311  -2 
  -8   2   1 445.752 6.10311   1 
   7  -1   1 55.5074 1.38035  -2 
  -7   2   1 55.5074 1.38035   1 
   6  -1   1 175.722 2.37805  -2 
  -6   2   1 175.722 2.37805   1 
   5  -1   1 567.695 6.50697  -2 
  -5   2   1 567.695 6.50697   1 
   4  -1   1 1012.21 11.1675  -2 
  -4   2   1 1012.21 11.1675   1 
   3  -1   1 731.404 8.75330  -2 
  -3   2   1 731.404 8.75330   1 
  -2   2   1 81.4482 1.46133   1 
   2  -1   1 623.163 15.8039  -2 
  -2   2   1 623.163 15.8039   1 
  -2   2   1 81.3304 1.34284   2 
   1  -1   1 241.461 8.00372  -2 
  -1   2   1 241.461 8.00372   1 
  -1   2   1 66.3873 1.15556   2 
  -1   2   1 66.6739 1.24036   1 
   0  -1   1 397.857 6.14917  -2 
   0   2   1 397.857 6.14917   1 
   0   2   1 318.616 8.95894   2 
   1   2   1 20.9064 0.42807   1 
   1   2   1 20.4780 0.43028   2 
   2   2   1 94.2281 1.40201   2 
   2   2   1 93.3303 1.29967   1 
   3   2   1 4.39727 0.37088   2 
   3   2   1 3.70315 0.43281   1 
  -3  -1   1 192.319 5.98203  -2 
   3   2   1 192.319 5.98203   1 
  -4  -1   1 40.5780 0.88259  -2 
   4   2   1 40.5780 0.88259   1 
  -5  -1   1 98.6446 1.54794  -2 
   5   2   1 98.6446 1.54794   1 
  -6  -1   1 137.568 2.13270  -2 
   6   2   1 137.568 2.13270   1 
  -7  -1   1 8.76329 0.93018  -2 
   7   2   1 8.76329 0.93018   1 
  -8  -1   1 103.169 2.26167  -2 
   8   2   1 103.169 2.26167   1 
  -9  -1   1 42.8869 1.53095  -2 
   9   2   1 42.8869 1.53095   1 
 -10  -1   1 98.2195 2.56108  -2 
  10   2   1 98.2195 2.56108   1 
 -11  -1   1 98.2424 2.67870  -2 
  11   2   1 98.2424 2.67870   1 
 -12  -1   1 7.62308 1.99702  -2 
  12   2   1 7.62308 1.99702   1 
 -13  -1   1 45.0946 2.93877  -2 
  13   2   1 45.0946 2.93877   1 
  13  -2   1 20.5753 2.43731  -2 
 -13   3   1 20.5753 2.43731   1 
  12  -2   1 19.6907 2.34429  -2 
 -12   3   1 19.6907 2.34429   1 
  11  -2   1 75.3775 2.80249  -2 
 -11   3   1 75.3775 2.80249   1 
  10  -2   1 126.152 3.20982  -2 
 -10   3   1 126.152 3.20982   1 
   9  -2   1 532.207 8.32871  -2 
  -9   3   1 532.207 8.32871   1 
   8  -2   1 98.2274 2.19757  -2 
  -8   3   1 98.2274 2.19757   1 
   7  -2   1 161.397 2.79268  -2 
  -7   3   1 161.397 2.79268   1 
   6  -2   1 422.126 5.31495  -2 
  -6   3   1 422.126 5.31495   1 
   5  -2   1 921.836 10.6862  -2 
  -5   3   1 921.836 10.6862   1 
   4  -2   1 391.441 4.71783  -2 
  -4   3   1 391.441 4.71783   1 
   3  -2   1 932.285 11.5816  -2 
  -3   3   1 932.285 11.5816   1 
   2  -2   1 555.872 7.21375  -2 
  -2   3   1 555.872 7.21375   1 
  -2   3   1 130.427 4.05722   2 
   1  -2   1 1222.79 15.5155  -2 
  -1   3   1 1222.79 15.5155   1 
  -1   3   1 1012.19 28.2996   2 
   0  -2   1 431.186 6.27224  -2 
   0   3   1 431.186 6.27224   1 
  -1  -2   1 3891.85 67.4732  -2 
   1   3   1 3891.85 67.4732   1 
   1   3   1 3946.09 65.3707   2 
   1   3   1 3978.09 68.1563   1 
   2   3   1 5.14320 0.65004   2 
  -2  -2   1 1171.89 29.4232  -2 
   2   3   1 1171.89 29.4232   1 
  -3  -2   1 832.670 11.8011  -2 
   3   3   1 832.670 11.8011   1 
   3   3   1 443.268 9.16294   2 
   3   3   1 454.142 7.70415   1 
  -4  -2   1 625.824 7.35533  -2 
   4   3   1 625.824 7.35533   1 
  -5  -2   1 290.723 3.60203  -2 
   5   3   1 290.723 3.60203   1 
  -6  -2   1 148.920 2.17267  -2 
   6   3   1 148.920 2.17267   1 
  -7  -2   1 165.279 2.59837  -2 
   7   3   1 165.279 2.59837   1 
  -8  -2   1 56.6265 1.68657  -2 
   8   3   1 56.6265 1.68657   1 
  -9  -2   1 4.94503 1.19188  -2 
   9   3   1 4.94503 1.19188   1 
 -10  -2   1 301.084 5.63706  -2 
  10   3   1 301.084 5.63706   1 
 -11  -2   1 156.268 3.46065  -2 
  11   3   1 156.268 3.46065   1 
 -12  -2   1 65.2289 2.51385  -2 
  12   3   1 65.2289 2.51385   1 
 -13  -2   1 93.2474 3.66217  -2 
  13   3   1 93.2474 3.66217   1 
  12  -3   1 239.966 5.95629  -2 
 -12   4   1 239.966 5.95629   1 
  11  -3   1 41.4994 2.36398  -2 
 -11   4   1 41.4994 2.36398   1 
  10  -3   1 52.3571 2.16775  -2 
 -10   4   1 52.3571 2.16775   1 
   9  -3   1 38.9486 1.85854  -2 
  -9   4   1 38.9486 1.85854   1 
   8  -3   1 115.931 2.78411  -2 
  -8   4   1 115.931 2.78411   1 
   7  -3   1 84.4635 1.89988  -2 
  -7   4   1 84.4635 1.89988   1 
   6  -3   1 1099.09 13.5990  -2 
  -6   4   1 1099.09 13.5990   1 
   5  -3   1 757.071 8.62205  -2 
  -5   4   1 757.071 8.62205   1 
   4  -3   1 387.175 4.53092  -2 
  -4   4   1 387.175 4.53092   1 
   3  -3   1 469.360 5.53541  -2 
  -3   4   1 469.360 5.53541   1 
   2  -3   1 653.035 7.81634  -2 
  -2   4   1 653.035 7.81634   1 
   1  -3   1 581.982 7.51014  -2 
  -1   4   1 581.982 7.51014   1 
   0  -3   1 1667.32 21.1087  -2 
   0   4   1 1667.32 21.1087   1 
  -1  -3   1 2043.20 25.2026  -2 
   1   4   1 2043.20 25.2026   1 
  -2  -3   1 573.203 6.63041  -2 
   2   4   1 573.203 6.63041   1 
  -3  -3   1 1077.67 11.5329  -2 
   3   4   1 1077.67 11.5329   1 
  -4  -3   1 1457.16 15.3016  -2 
   4   4   1 1457.16 15.3016   1 
  -5  -3   1 486.228 5.71678  -2 
   5   4   1 486.228 5.71678   1 
  -6  -3   1 359.787 4.44410  -2 
   6   4   1 359.787 4.44410   1 
  -7  -3   1 85.8272 1.70596  -2 
   7   4   1 85.8272 1.70596   1 
  -8  -3   1 24.0344 1.28441  -2 
   8   4   1 24.0344 1.28441   1 
  -9  -3   1 146.063 2.90440  -2 
   9   4   1 146.063 2.90440   1 
 -10  -3   1 405.602 7.17387  -2 
  10   4   1 405.602 7.17387   1 
 -11  -3   1 405.458 7.31744  -2 
  11   4   1 405.458 7.31744   1 
 -12  -3   1 9.91436 1.75888  -2 
  12   4   1 9.91436 1.75888   1 
 -13  -3   1 -3.8624 2.16831  -2 
  13   4   1 -3.8624 2.16831   1 
  12  -4   1 3.95018 2.25531  -2 
 -12   5   1 3.95018 2.25531   1 
  11  -4   1 1.27049 1.75058  -2 
 -11   5   1 1.27049 1.75058   1 
  10  -4   1 5.74067 1.57939  -2 
 -10   5   1 5.74067 1.57939   1 
   9  -4   1 38.1444 1.88216  -2 
  -9   5   1 38.1444 1.88216   1 
   8  -4   1 45.7362 1.76127  -2 
  -8   5   1 45.7362 1.76127   1 
   7  -4   1 530.596 7.42056  -2 
  -7   5   1 530.596 7.42056   1 
   6  -4   1 124.035 2.21398  -2 
  -6   5   1 124.035 2.21398   1 
   5  -4   1 577.362 6.74630  -2 
  -5   5   1 577.362 6.74630   1 
   4  -4   1 200.088 2.66962  -2 
  -4   5   1 200.088 2.66962   1 
   3  -4   1 347.109 4.04791  -2 
  -3   5   1 347.109 4.04791   1 
   2  -4   1 163.070 2.20097  -2 
  -2   5   1 163.070 2.20097   1 
   1  -4   1 130.918 1.77505  -2 
  -1   5   1 130.918 1.77505   1 
   0  -4   1 283.862 3.62701  -2 
   0   5   1 283.862 3.62701   1 
  -1  -4   1 35.7872 0.72294  -2 
   1   5   1 35.7872 0.72294   1 
  -2  -4   1 257.610 3.14153  -2 
   2   5   1 257.610 3.14153   1 
  -3  -4   1 654.147 6.88779  -2 
   3   5   1 654.147 6.88779   1 
  -4  -4   1 667.665 7.21351  -2 
   4   5   1 667.665 7.21351   1 
  -5  -4   1 80.6087 1.27556  -2 
   5   5   1 80.6087 1.27556   1 
  -6  -4   1 309.932 3.90891  -2 
   6   5   1 309.932 3.90891   1 
  -7  -4   1 88.8228 1.81576  -2 
   7   5   1 88.8228 1.81576   1 
  -8  -4   1 20.8505 1.24492  -2 
   8   5   1 20.8505 1.24492   1 
  -9  -4   1 58.0604 1.79129  -2 
   9   5   1 58.0604 1.79129   1 
 -10  -4   1 405.036 7.17769  -2 
  10   5   1 405.036 7.17769   1 
 -11  -4   1 149.042 3.55660  -2 
  11   5   1 149.042 3.55660   1 
 -12  -4   1 -1.6232 1.74282  -2 
  12   5   1 -1.6232 1.74282   1 
 -13  -4   1 10.5861 2.02864  -2 
  13   5   1 10.5861 2.02864   1 
  12  -5   1 138.491 4.71396  -2 
 -12   6   1 138.491 4.71396   1 
  11  -5   1 65.4794 2.56782  -2 
 -11   6   1 65.4794 2.56782   1 
  10  -5   1 120.122 3.17674  -2 
 -10   6   1 120.122 3.17674   1 
   9  -5   1 43.3606 1.87126  -2 
  -9   6   1 43.3606 1.87126   1 
   8  -5   1 243.702 4.15885  -2 
  -8   6   1 243.702 4.15885   1 
   7  -5   1 28.5414 1.32198  -2 
  -7   6   1 28.5414 1.32198   1 
   6  -5   1 375.614 5.15925  -2 
  -6   6   1 375.614 5.15925   1 
   5  -5   1 305.912 4.04325  -2 
  -5   6   1 305.912 4.04325   1 
   4  -5   1 216.326 2.70031  -2 
  -4   6   1 216.326 2.70031   1 
   3  -5   1 16.8744 0.64453  -2 
  -3   6   1 16.8744 0.64453   1 
   2  -5   1 493.902 5.58542  -2 
  -2   6   1 493.902 5.58542   1 
   1  -5   1 191.479 2.42283  -2 
  -1   6   1 191.479 2.42283   1 
   0  -5   1 259.740 3.27830  -2 
   0   6   1 259.740 3.27830   1 
  -1  -5   1 101.259 1.38611  -2 
   1   6   1 101.259 1.38611   1 
  -2  -5   1 32.9197 0.65948  -2 
   2   6   1 32.9197 0.65948   1 
  -3  -5   1 158.683 1.93877  -2 
   3   6   1 158.683 1.93877   1 
  -4  -5   1 123.327 1.64002  -2 
   4   6   1 123.327 1.64002   1 
  -5  -5   1 216.031 2.61803  -2 
   5   6   1 216.031 2.61803   1 
  -6  -5   1 357.807 4.17561  -2 
   6   6   1 357.807 4.17561   1 
  -7  -5   1 124.598 2.31316  -2 
   7   6   1 124.598 2.31316   1 
  -8  -5   1 19.4345 1.19898  -2 
   8   6   1 19.4345 1.19898   1 
  -9  -5   1 200.292 3.60632  -2 
   9   6   1 200.292 3.60632   1 
 -10  -5   1 377.068 6.76951  -2 
  10   6   1 377.068 6.76951   1 
 -11  -5   1 59.5615 2.29459  -2 
  11   6   1 59.5615 2.29459   1 
 -12  -5   1 6.74671 1.81209  -2 
  12   6   1 6.74671 1.81209   1 
 -13  -5   1 37.0349 2.50991  -2 
  13   6   1 37.0349 2.50991   1 
  12  -6   1 122.104 4.93753  -2 
 -12   7   1 122.104 4.93753   1 
  11  -6   1 102.604 3.34489  -2 
 -11   7   1 102.604 3.34489   1 
  10  -6   1 117.381 3.18096  -2 
 -10   7   1 117.381 3.18096   1 
   9  -6   1 14.4234 1.56631  -2 
  -9   7   1 14.4234 1.56631   1 
   8  -6   1 11.4735 1.37720  -2 
  -8   7   1 11.4735 1.37720   1 
   7  -6   1 115.452 2.43852  -2 
  -7   7   1 115.452 2.43852   1 
   6  -6   1 123.668 2.25717  -2 
  -6   7   1 123.668 2.25717   1 
   5  -6   1 691.231 8.42962  -2 
  -5   7   1 691.231 8.42962   1 
   4  -6   1 205.817 2.72856  -2 
  -4   7   1 205.817 2.72856   1 
   3  -6   1 147.855 1.95877  -2 
  -3   7   1 147.855 1.95877   1 
   2  -6   1 345.369 4.04121  -2 
  -2   7   1 345.369 4.04121   1 
   1  -6   1 649.467 7.24999  -2 
  -1   7   1 649.467 7.24999   1 
   0  -6   1 105.550 1.44483  -2 
   0   7   1 105.550 1.44483   1 
  -1  -6   1 896.660 9.69335  -2 
   1   7   1 896.660 9.69335   1 
  -2  -6   1 6.91770 0.48755  -2 
   2   7   1 6.91770 0.48755   1 
  -3  -6   1 548.662 5.97077  -2 
   3   7   1 548.662 5.97077   1 
  -4  -6   1 7.01246 0.56301  -2 
   4   7   1 7.01246 0.56301   1 
  -5  -6   1 27.7214 0.80471  -2 
   5   7   1 27.7214 0.80471   1 
  -6  -6   1 131.464 1.90580  -2 
   6   7   1 131.464 1.90580   1 
  -7  -6   1 28.9842 1.12753  -2 
   7   7   1 28.9842 1.12753   1 
  -8  -6   1 40.5480 1.46462  -2 
   8   7   1 40.5480 1.46462   1 
  -9  -6   1 106.870 2.42838  -2 
   9   7   1 106.870 2.42838   1 
 -10  -6   1 66.9415 2.26045  -2 
  10   7   1 66.9415 2.26045   1 
 -11  -6   1 133.775 3.33851  -2 
  11   7   1 133.775 3.33851   1 
 -12  -6   1 11.3515 1.86648  -2 
  12   7   1 11.3515 1.86648   1 
 -13  -6   1 -0.3308 2.02313  -2 
  13   7   1 -0.3308 2.02313   1 
  11  -7   1 74.9890 3.53648  -2 
 -11   8   1 74.9890 3.53648   1 
  10  -7   1 230.897 4.86531  -2 
 -10   8   1 230.897 4.86531   1 
   9  -7   1 1.65031 1.53964  -2 
  -9   8   1 1.65031 1.53964   1 
   8  -7   1 33.0612 1.67125  -2 
  -8   8   1 33.0612 1.67125   1 
   7  -7   1 175.865 3.25883  -2 
  -7   8   1 175.865 3.25883   1 
   6  -7   1 163.088 2.83605  -2 
  -6   8   1 163.088 2.83605   1 
   5  -7   1 162.805 2.65094  -2 
  -5   8   1 162.805 2.65094   1 
   4  -7   1 305.915 4.03830  -2 
  -4   8   1 305.915 4.03830   1 
   3  -7   1 86.5052 1.38016  -2 
  -3   8   1 86.5052 1.38016   1 
   2  -7   1 71.8355 1.17353  -2 
  -2   8   1 71.8355 1.17353   1 
   1  -7   1 316.435 3.74493  -2 
  -1   8   1 316.435 3.74493   1 
   0  -7   1 334.207 3.91049  -2 
   0   8   1 334.207 3.91049   1 
  -1  -7   1 278.534 3.32200  -2 
   1   8   1 278.534 3.32200   1 
  -2  -7   1 82.6352 1.20865  -2 
   2   8   1 82.6352 1.20865   1 
  -3  -7   1 157.234 1.96436  -2 
   3   8   1 157.234 1.96436   1 
  -4  -7   1 702.301 7.44647  -2 
   4   8   1 702.301 7.44647   1 
  -5  -7   1 58.4401 1.14005  -2 
   5   8   1 58.4401 1.14005   1 
  -6  -7   1 99.5259 1.67271  -2 
   6   8   1 99.5259 1.67271   1 
  -7  -7   1 13.0392 0.97644  -2 
   7   8   1 13.0392 0.97644   1 
  -8  -7   1 71.1377 1.77888  -2 
   8   8   1 71.1377 1.77888   1 
  -9  -7   1 4.15541 1.16861  -2 
   9   8   1 4.15541 1.16861   1 
 -10  -7   1 331.844 6.09959  -2 
  10   8   1 331.844 6.09959   1 
 -11  -7   1 50.6283 2.13992  -2 
  11   8   1 50.6283 2.13992   1 
 -12  -7   1 14.6385 2.03686  -2 
  12   8   1 14.6385 2.03686   1 
 -13  -7   1 -4.5027 2.37476  -2 
  13   8   1 -4.5027 2.37476   1 
  11  -8   1 28.5820 2.76248  -2 
 -11   9   1 28.5820 2.76248   1 
  10  -8   1 29.8560 2.28616  -2 
 -10   9   1 29.8560 2.28616   1 
   9  -8   1 66.1945 2.43024  -2 
  -9   9   1 66.1945 2.43024   1 
   8  -8   1 151.370 3.30085  -2 
  -8   9   1 151.370 3.30085   1 
   7  -8   1 35.1463 1.65234  -2 
  -7   9   1 35.1463 1.65234   1 
   6  -8   1 78.9443 1.98404  -2 
  -6   9   1 78.9443 1.98404   1 
   5  -8   1 358.733 4.98147  -2 
  -5   9   1 358.733 4.98147   1 
   4  -8   1 326.867 4.51262  -2 
  -4   9   1 326.867 4.51262   1 
   3  -8   1 926.358 11.0159  -2 
  -3   9   1 926.358 11.0159   1 
   2  -8   1 17.4217 0.71146  -2 
  -2   9   1 17.4217 0.71146   1 
   1  -8   1 226.251 2.76223  -2 
  -1   9   1 226.251 2.76223   1 
   0  -8   1 206.624 2.52946  -2 
   0   9   1 206.624 2.52946   1 
  -1  -8   1 737.236 8.03057  -2 
   1   9   1 737.236 8.03057   1 
  -2  -8   1 55.1959 0.98117  -2 
   2   9   1 55.1959 0.98117   1 
  -3  -8   1 830.312 8.70695  -2 
   3   9   1 830.312 8.70695   1 
  -4  -8   1 395.319 4.40537  -2 
   4   9   1 395.319 4.40537   1 
  -5  -8   1 69.9065 1.32707  -2 
   5   9   1 69.9065 1.32707   1 
  -6  -8   1 28.0529 1.04739  -2 
   6   9   1 28.0529 1.04739   1 
  -7  -8   1 90.1549 1.84423  -2 
   7   9   1 90.1549 1.84423   1 
  -8  -8   1 43.1627 1.41670  -2 
   8   9   1 43.1627 1.41670   1 
  -9  -8   1 151.297 3.17346  -2 
   9   9   1 151.297 3.17346   1 
 -10  -8   1 62.0074 2.19510  -2 
  10   9   1 62.0074 2.19510   1 
 -11  -8   1 8.63982 1.60814  -2 
  11   9   1 8.63982 1.60814   1 
 -12  -8   1 16.5768 2.08642  -2 
  12   9   1 16.5768 2.08642   1 
 -13  -8   1 1.20900 1.92211  -2 
  13   9   1 1.20900 1.92211   1 
  10  -9   1 134.029 4.57623  -2 
 -10  10   1 134.029 4.57623   1 
   9  -9   1 33.6953 2.10397  -2 
  -9  10   1 33.6953 2.10397   1 
   8  -9   1 129.144 3.23233  -2 
  -8  10   1 129.144 3.23233   1 
   7  -9   1 74.8632 2.20746  -2 
  -7  10   1 74.8632 2.20746   1 
   6  -9   1 33.8144 1.50281  -2 
  -6  10   1 33.8144 1.50281   1 
   5  -9   1 151.546 2.70723  -2 
  -5  10   1 151.546 2.70723   1 
   4  -9   1 835.560 10.5721  -2 
  -4  10   1 835.560 10.5721   1 
   3  -9   1 91.3925 1.76440  -2 
  -3  10   1 91.3925 1.76440   1 
   2  -9   1 182.407 2.61641  -2 
  -2  10   1 182.407 2.61641   1 
   1  -9   1 35.7393 0.95869  -2 
  -1  10   1 35.7393 0.95869   1 
   0  -9   1 509.971 5.95159  -2 
   0  10   1 509.971 5.95159   1 
  -1  -9   1 417.943 4.76612  -2 
   1  10   1 417.943 4.76612   1 
  -2  -9   1 475.719 5.37498  -2 
   2  10   1 475.719 5.37498   1 
  -3  -9   1 194.933 2.41388  -2 
   3  10   1 194.933 2.41388   1 
  -4  -9   1 1136.28 12.4753  -2 
   4  10   1 1136.28 12.4753   1 
  -5  -9   1 149.886 2.31820  -2 
   5  10   1 149.886 2.31820   1 
  -6  -9   1 342.053 4.70006  -2 
   6  10   1 342.053 4.70006   1 
  -7  -9   1 292.633 4.19140  -2 
   7  10   1 292.633 4.19140   1 
  -8  -9   1 119.220 2.28818  -2 
   8  10   1 119.220 2.28818   1 
  -9  -9   1 108.100 2.60790  -2 
   9  10   1 108.100 2.60790   1 
 -10  -9   1 255.810 5.01883  -2 
  10  10   1 255.810 5.01883   1 
 -11  -9   1 53.5191 2.21625  -2 
  11  10   1 53.5191 2.21625   1 
 -12  -9   1 102.664 3.43169  -2 
  12  10   1 102.664 3.43169   1 
 -13  -9   1 25.6082 2.32495  -2 
  13  10   1 25.6082 2.32495   1 
  10 -10   1 16.3511 2.54425  -2 
 -10  11   1 16.3511 2.54425   1 
   9 -10   1 46.5859 2.50965  -2 
  -9  11   1 46.5859 2.50965   1 
   8 -10   1 12.9228 1.75187  -2 
  -8  11   1 12.9228 1.75187   1 
   7 -10   1 332.550 6.06108  -2 
  -7  11   1 332.550 6.06108   1 
   6 -10   1 130.077 2.86400  -2 
  -6  11   1 130.077 2.86400   1 
   5 -10   1 107.846 2.37095  -2 
  -5  11   1 107.846 2.37095   1 
   4 -10   1 40.8202 1.39574  -2 
  -4  11   1 40.8202 1.39574   1 
   3 -10   1 785.309 9.95136  -2 
  -3  11   1 785.309 9.95136   1 
   2 -10   1 196.507 2.96247  -2 
  -2  11   1 196.507 2.96247   1 
   1 -10   1 393.870 5.00416  -2 
  -1  11   1 393.870 5.00416   1 
   0 -10   1 424.253 5.56598  -2 
   0  11   1 424.253 5.56598   1 
  -1 -10   1 210.492 2.83429  -2 
   1  11   1 210.492 2.83429   1 
  -2 -10   1 130.273 1.97412  -2 
   2  11   1 130.273 1.97412   1 
  -3 -10   1 744.074 8.34879  -2 
   3  11   1 744.074 8.34879   1 
  -4 -10   1 369.650 4.75653  -2 
   4  11   1 369.650 4.75653   1 
  -5 -10   1 141.018 2.26693  -2 
   5  11   1 141.018 2.26693   1 
  -6 -10   1 312.150 4.37784  -2 
   6  11   1 312.150 4.37784   1 
  -7 -10   1 241.643 3.64782  -2 
   7  11   1 241.643 3.64782   1 
  -8 -10   1 472.211 6.40184  -2 
   8  11   1 472.211 6.40184   1 
  -9 -10   1 485.091 7.29488  -2 
   9  11   1 485.091 7.29488   1 
 -10 -10   1 210.485 4.39041  -2 
  10  11   1 210.485 4.39041   1 
 -11 -10   1 10.9753 1.65511  -2 
  11  11   1 10.9753 1.65511   1 
 -12 -10   1 19.0882 2.21726  -2 
  12  11   1 19.0882 2.21726   1 
 -13 -10   1 9.69603 2.24672  -2 
  13  11   1 9.69603 2.24672   1 
   9 -11   1 -0.0575 2.11196  -2 
  -9  12   1 -0.0575 2.11196   1 
   8 -11   1 115.508 3.18660  -2 
  -8  12   1 115.508 3.18660   1 
   7 -11   1 79.1378 2.53788  -2 
  -7  12   1 79.1378 2.53788   1 
   6 -11   1 28.8998 1.65700  -2 
  -6  12   1 28.8998 1.65700   1 
   5 -11   1 3.39610 1.19324  -2 
  -5  12   1 3.39610 1.19324   1 
   4 -11   1 249.478 4.10558  -2 
  -4  12   1 249.478 4.10558   1 
   3 -11   1 3.29765 1.00576  -2 
  -3  12   1 3.29765 1.00576   1 
   2 -11   1 55.7010 1.48670  -2 
  -2  12   1 55.7010 1.48670   1 
   1 -11   1 91.8399 1.78160  -2 
  -1  12   1 91.8399 1.78160   1 
   0 -11   1 231.860 3.55191  -2 
   0  12   1 231.860 3.55191   1 
  -1 -11   1 286.797 4.00088  -2 
   1  12   1 286.797 4.00088   1 
  -2 -11   1 747.070 9.42955  -2 
   2  12   1 747.070 9.42955   1 
  -3 -11   1 16.8252 0.89619  -2 
   3  12   1 16.8252 0.89619   1 
  -4 -11   1 51.5814 1.32648  -2 
   4  12   1 51.5814 1.32648   1 
  -5 -11   1 50.4678 1.37461  -2 
   5  12   1 50.4678 1.37461   1 
  -6 -11   1 305.031 4.34204  -2 
   6  12   1 305.031 4.34204   1 
  -7 -11   1 575.837 7.55587  -2 
   7  12   1 575.837 7.55587   1 
  -8 -11   1 577.683 8.41262  -2 
   8  12   1 577.683 8.41262   1 
  -9 -11   1 232.520 4.09897  -2 
   9  12   1 232.520 4.09897   1 
 -10 -11   1 44.3977 1.90715  -2 
  10  12   1 44.3977 1.90715   1 
 -11 -11   1 2.23720 1.82459  -2 
  11  12   1 2.23720 1.82459   1 
 -12 -11   1 48.5641 2.58854  -2 
  12  12   1 48.5641 2.58854   1 
   9 -12   1 40.1534 2.58747  -2 
  -9  13   1 40.1534 2.58747   1 
   8 -12   1 22.2392 2.14300  -2 
  -8  13   1 22.2392 2.14300   1 
   7 -12   1 56.4463 2.31305  -2 
  -7  13   1 56.4463 2.31305   1 
   6 -12   1 86.9709 2.56089  -2 
  -6  13   1 86.9709 2.56089   1 
   5 -12   1 92.4181 2.41122  -2 
  -5  13   1 92.4181 2.41122   1 
   4 -12   1 75.7919 2.01335  -2 
  -4  13   1 75.7919 2.01335   1 
   3 -12   1 326.051 5.08957  -2 
  -3  13   1 326.051 5.08957   1 
   2 -12   1 2.79536 1.00270  -2 
  -2  13   1 2.79536 1.00270   1 
   1 -12   1 201.105 3.20271  -2 
  -1  13   1 201.105 3.20271   1 
   0 -12   1 309.695 4.74091  -2 
   0  13   1 309.695 4.74091   1 
  -1 -12   1 286.249 4.20334  -2 
   1  13   1 286.249 4.20334   1 
  -2 -12   1 50.2252 1.38160  -2 
   2  13   1 50.2252 1.38160   1 
  -3 -12   1 93.0872 1.80483  -2 
   3  13   1 93.0872 1.80483   1 
  -4 -12   1 16.3421 1.01526  -2 
   4  13   1 16.3421 1.01526   1 
  -5 -12   1 38.3655 1.28211  -2 
   5  13   1 38.3655 1.28211   1 
  -6 -12   1 172.765 2.85651  -2 
   6  13   1 172.765 2.85651   1 
  -7 -12   1 177.467 3.13336  -2 
   7  13   1 177.467 3.13336   1 
  -8 -12   1 138.023 2.85130  -2 
   8  13   1 138.023 2.85130   1 
  -9 -12   1 18.7069 1.46346  -2 
   9  13   1 18.7069 1.46346   1 
 -10 -12   1 18.4571 1.62267  -2 
  10  13   1 18.4571 1.62267   1 
 -11 -12   1 36.7455 2.25106  -2 
  11  13   1 36.7455 2.25106   1 
 -12 -12   1 80.3050 3.10858  -2 
  12  13   1 80.3050 3.10858   1 
   8 -13   1 121.367 3.71131  -2 
  -8  14   1 121.367 3.71131   1 
   7 -13   1 242.410 5.03495  -2 
  -7  14   1 242.410 5.03495   1 
   6 -13   1 89.0849 2.72598  -2 
  -6  14   1 89.0849 2.72598   1 
   5 -13   1 54.2053 2.14517  -2 
  -5  14   1 54.2053 2.14517   1 
   4 -13   1 20.9971 1.52747  -2 
  -4  14   1 20.9971 1.52747   1 
   3 -13   1 7.79478 1.28538  -2 
  -3  14   1 7.79478 1.28538   1 
   2 -13   1 199.068 3.46509  -2 
  -2  14   1 199.068 3.46509   1 
   1 -13   1 105.192 2.38081  -2 
  -1  14   1 105.192 2.38081   1 
   0 -13   1 224.008 3.72896  -2 
   0  14   1 224.008 3.72896   1 
  -1 -13   1 75.5183 1.74492  -2 
   1  14   1 75.5183 1.74492   1 
  -2 -13   1 72.0286 1.62636  -2 
   2  14   1 72.0286 1.62636   1 
  -3 -13   1 29.7570 1.20106  -2 
   3  14   1 29.7570 1.20106   1 
  -4 -13   1 288.339 4.12686  -2 
   4  14   1 288.339 4.12686   1 
  -5 -13   1 33.0505 1.27800  -2 
   5  14   1 33.0505 1.27800   1 
  -6 -13   1 115.484 2.33567  -2 
   6  14   1 115.484 2.33567   1 
  -7 -13   1 45.8101 1.68721  -2 
   7  14   1 45.8101 1.68721   1 
  -8 -13   1 64.7471 1.95500  -2 
   8  14   1 64.7471 1.95500   1 
  -9 -13   1 5.58430 1.33118  -2 
   9  14   1 5.58430 1.33118   1 
 -10 -13   1 62.9463 2.20209  -2 
  10  14   1 62.9463 2.20209   1 
 -11 -13   1 64.0462 2.75258  -2 
  11  14   1 64.0462 2.75258   1 
 -12 -13   1 28.6257 2.25806  -2 
  12  14   1 28.6257 2.25806   1 
   7 -14   1 69.7727 2.92926  -2 
  -7  15   1 69.7727 2.92926   1 
   6 -14   1 120.251 3.27187  -2 
  -6  15   1 120.251 3.27187   1 
   5 -14   1 211.088 4.39538  -2 
  -5  15   1 211.088 4.39538   1 
   4 -14   1 17.3547 1.64789  -2 
  -4  15   1 17.3547 1.64789   1 
   3 -14   1 90.9520 2.49112  -2 
  -3  15   1 90.9520 2.49112   1 
   2 -14   1 31.0237 1.48901  -2 
  -2  15   1 31.0237 1.48901   1 
   1 -14   1 10.7763 1.29893  -2 
  -1  15   1 10.7763 1.29893   1 
   0 -14   1 58.8744 1.70428  -2 
   0  15   1 58.8744 1.70428   1 
  -1 -14   1 250.332 4.10650  -2 
   1  15   1 250.332 4.10650   1 
  -2 -14   1 12.0580 1.11044  -2 
   2  15   1 12.0580 1.11044   1 
  -3 -14   1 123.741 2.37952  -2 
   3  15   1 123.741 2.37952   1 
  -4 -14   1 42.9187 1.46354  -2 
   4  15   1 42.9187 1.46354   1 
  -5 -14   1 5.53946 1.08402  -2 
   5  15   1 5.53946 1.08402   1 
  -6 -14   1 53.6139 1.72719  -2 
   6  15   1 53.6139 1.72719   1 
  -7 -14   1 46.3699 1.71227  -2 
   7  15   1 46.3699 1.71227   1 
  -8 -14   1 1.85391 1.23433  -2 
   8  15   1 1.85391 1.23433   1 
  -9 -14   1 44.1990 1.91776  -2 
   9  15   1 44.1990 1.91776   1 
 -10 -14   1 5.25039 1.59354  -2 
  10  15   1 5.25039 1.59354   1 
 -11 -14   1 26.1047 2.08561  -2 
  11  15   1 26.1047 2.08561   1 
   7 -15   1 64.6529 2.86878  -2 
  -7  16   1 64.6529 2.86878   1 
   6 -15   1 142.683 3.92846  -2 
  -6  16   1 142.683 3.92846   1 
   5 -15   1 9.04111 1.80305  -2 
  -5  16   1 9.04111 1.80305   1 
   4 -15   1 72.7032 2.45407  -2 
  -4  16   1 72.7032 2.45407   1 
   3 -15   1 118.256 2.98793  -2 
  -3  16   1 118.256 2.98793   1 
   2 -15   1 10.9364 1.62201  -2 
  -2  16   1 10.9364 1.62201   1 
   1 -15   1 31.2501 1.71158  -2 
  -1  16   1 31.2501 1.71158   1 
   0 -15   1 171.311 3.19876  -2 
   0  16   1 171.311 3.19876   1 
  -1 -15   1 73.0856 1.95178  -2 
   1  16   1 73.0856 1.95178   1 
  -2 -15   1 92.9813 2.06133  -2 
   2  16   1 92.9813 2.06133   1 
  -3 -15   1 84.9824 1.98527  -2 
   3  16   1 84.9824 1.98527   1 
  -4 -15   1 38.8628 1.51842  -2 
   4  16   1 38.8628 1.51842   1 
  -5 -15   1 74.8456 1.98710  -2 
   5  16   1 74.8456 1.98710   1 
  -6 -15   1 178.752 3.34478  -2 
   6  16   1 178.752 3.34478   1 
  -7 -15   1 13.8443 1.36372  -2 
   7  16   1 13.8443 1.36372   1 
  -8 -15   1 73.9137 2.25926  -2 
   8  16   1 73.9137 2.25926   1 
  -9 -15   1 51.2503 2.15997  -2 
   9  16   1 51.2503 2.15997   1 
 -10 -15   1 3.97309 1.59953  -2 
  10  16   1 3.97309 1.59953   1 
 -11 -15   1 3.79997 1.87820  -2 
  11  16   1 3.79997 1.87820   1 
   6 -16   1 3.74011 2.07068  -2 
  -6  17   1 3.74011 2.07068   1 
   5 -16   1 78.3436 2.96728  -2 
  -5  17   1 78.3436 2.96728   1 
   4 -16   1 53.0466 2.31828  -2 
  -4  17   1 53.0466 2.31828   1 
   3 -16   1 78.3724 2.54036  -2 
  -3  17   1 78.3724 2.54036   1 
   2 -16   1 85.3891 2.75869  -2 
  -2  17   1 85.3891 2.75869   1 
   1 -16   1 20.8977 1.63581  -2 
  -1  17   1 20.8977 1.63581   1 
   0 -16   1 48.9059 1.97934  -2 
   0  17   1 48.9059 1.97934   1 
  -1 -16   1 254.902 4.55350  -2 
   1  17   1 254.902 4.55350   1 
  -2 -16   1 85.2647 2.14507  -2 
   2  17   1 85.2647 2.14507   1 
  -3 -16   1 2.84368 1.20075  -2 
   3  17   1 2.84368 1.20075   1 
  -4 -16   1 9.57416 1.26548  -2 
   4  17   1 9.57416 1.26548   1 
  -5 -16   1 59.8693 1.87232  -2 
   5  17   1 59.8693 1.87232   1 
  -6 -16   1 77.6216 2.13330  -2 
   6  17   1 77.6216 2.13330   1 
  -7 -16   1 140.912 3.15228  -2 
   7  17   1 140.912 3.15228   1 
  -8 -16   1 43.2650 1.94156  -2 
   8  17   1 43.2650 1.94156   1 
  -9 -16   1 24.8614 1.87180  -2 
   9  17   1 24.8614 1.87180   1 
 -10 -16   1 27.5090 1.92030  -2 
  10  17   1 27.5090 1.92030   1 
   5 -17   1 13.8286 2.11557  -2 
  -5  18   1 13.8286 2.11557   1 
   4 -17   1 91.8924 3.12572  -2 
  -4  18   1 91.8924 3.12572   1 
   3 -17   1 22.3239 2.07184  -2 
  -3  18   1 22.3239 2.07184   1 
   2 -17   1 47.4071 2.31348  -2 
  -2  18   1 47.4071 2.31348   1 
   1 -17   1 86.5563 2.60331  -2 
  -1  18   1 86.5563 2.60331   1 
   0 -17   1 202.679 4.19352  -2 
   0  18   1 202.679 4.19352   1 
  -1 -17   1 19.8325 1.64008  -2 
   1  18   1 19.8325 1.64008   1 
  -2 -17   1 53.6477 1.90958  -2 
   2  18   1 53.6477 1.90958   1 
  -3 -17   1 27.7296 1.61833  -2 
   3  18   1 27.7296 1.61833   1 
  -4 -17   1 15.2867 1.46772  -2 
   4  18   1 15.2867 1.46772   1 
  -5 -17   1 155.207 3.29604  -2 
   5  18   1 155.207 3.29604   1 
  -6 -17   1 224.807 4.30008  -2 
   6  18   1 224.807 4.30008   1 
  -7 -17   1 29.9206 1.75537  -2 
   7  18   1 29.9206 1.75537   1 
  -8 -17   1 47.3134 2.14580  -2 
   8  18   1 47.3134 2.14580   1 
  -9 -17   1 38.5776 2.10175  -2 
   9  18   1 38.5776 2.10175   1 
   4 -18   1 5.13706 2.03119  -2 
  -4  19   1 5.13706 2.03119   1 
   3 -18   1 136.709 3.80948  -2 
  -3  19   1 136.709 3.80948   1 
   2 -18   1 100.297 2.94999  -2 
  -2  19   1 100.297 2.94999   1 
   1 -18   1 162.757 3.76410  -2 
  -1  19   1 162.757 3.76410   1 
   0 -18   1 4.01808 1.64518  -2 
   0  19   1 4.01808 1.64518   1 
  -1 -18   1 80.6989 2.55362  -2 
   1  19   1 80.6989 2.55362   1 
  -2 -18   1 4.56278 1.45035  -2 
   2  19   1 4.56278 1.45035   1 
  -3 -18   1 73.4969 2.29847  -2 
   3  19   1 73.4969 2.29847   1 
  -4 -18   1 130.119 3.02989  -2 
   4  19   1 130.119 3.02989   1 
  -5 -18   1 71.5712 2.28871  -2 
   5  19   1 71.5712 2.28871   1 
  -6 -18   1 105.251 2.76428  -2 
   6  19   1 105.251 2.76428   1 
  -7 -18   1 158.856 3.71308  -2 
   7  19   1 158.856 3.71308   1 
  -8 -18   1 11.1739 1.74031  -2 
   8  19   1 11.1739 1.74031   1 
  -9 -18   1 26.2131 2.40067  -2 
   9  19   1 26.2131 2.40067   1 
   2 -19   1 65.7455 2.76312  -2 
  -2  20   1 65.7455 2.76312   1 
   1 -19   1 58.5261 2.60378  -2 
  -1  20   1 58.5261 2.60378   1 
   0 -19   1 118.040 3.18327  -2 
   0  20   1 118.040 3.18327   1 
  -1 -19   1 -1.0139 1.57143  -2 
   1  20   1 -1.0139 1.57143   1 
  -2 -19   1 108.437 2.84312  -2 
   2  20   1 108.437 2.84312   1 
  -3 -19   1 17.9952 1.71159  -2 
   3  20   1 17.9952 1.71159   1 
  -4 -19   1 11.6189 1.63283  -2 
   4  20   1 11.6189 1.63283   1 
  -5 -19   1 146.526 3.52531  -2 
   5  20   1 146.526 3.52531   1 
  -6 -19   1 170.477 3.89395  -2 
   6  20   1 170.477 3.89395   1 
  -7 -19   1 21.9239 1.84287  -2 
   7  20   1 21.9239 1.84287   1 
   0 -20   1 2.10257 2.26808  -2 
   0  21   1 2.10257 2.26808   1 
  -1 -20   1 3.10887 1.84171  -2 
   1  21   1 3.10887 1.84171   1 
  -2 -20   1 8.03823 1.89778  -2 
   2  21   1 8.03823 1.89778   1 
  -3 -20   1 35.7450 2.06348  -2 
   3  21   1 35.7450 2.06348   1 
  -4 -20   1 99.1432 2.90284  -2 
   4  21   1 99.1432 2.90284   1 
  -5 -20   1 22.9375 2.02797  -2 
   5  21   1 22.9375 2.02797   1 
  -6 -20   1 13.3463 2.16938  -2 
   6  21   1 13.3463 2.16938   1 
  -5 -20   2 1.91738 1.22608   1 
  -5 -20   2 1.15324 0.99534   2 
  -4 -20   2 0.92705 1.09743   1 
  -4 -20   2 2.67474 0.97919   2 
   3  22   2 99.6461 4.96819  -2 
  -3 -20   2 99.6461 4.96819   1 
  -3 -20   2 104.303 5.81616   1 
  -3 -20   2 100.123 5.49910   2 
  -2 -20   2 7.45531 2.53770   1 
   2  22   2 52.4813 3.83044  -2 
  -2 -20   2 52.4813 3.83044   1 
  -2 -20   2 7.82386 2.16744   2 
  -1 -20   2 2.82523 1.18394   1 
  -1 -20   2 1.73983 1.06298   2 
   0 -20   2 37.8335 2.17166   2 
   0 -20   2 39.3092 2.62519   1 
  -7 -19   2 2.54108 1.33072   1 
  -7 -19   2 3.12619 1.07343   2 
  -6 -19   2 -1.5063 1.27975   1 
  -6 -19   2 1.12903 1.34751   2 
   6  21   2 5.34951 5.68205  -2 
  -6 -19   2 5.34951 5.68205   1 
   5  21   2 26.3526 3.68910  -2 
  -5 -19   2 26.3526 3.68910   1 
  -5 -19   2 3.25875 3.20363   2 
  -5 -19   2 2.19538 1.42293   1 
  -4 -19   2 56.6258 3.58294   2 
   4  21   2 75.2640 4.59802  -2 
  -4 -19   2 75.2640 4.59802   1 
  -4 -19   2 55.1937 3.38598   1 
   3  21   2 74.3874 3.57595  -2 
  -3 -19   2 74.3874 3.57595   1 
  -3 -19   2 52.5221 5.78940   1 
  -3 -19   2 56.4575 3.49602   2 
   2  21   2 23.9138 2.60401  -2 
  -2 -19   2 23.9138 2.60401   1 
  -2 -19   2 1.29509 2.18546   1 
  -2 -19   2 -2.8413 2.65939   2 
   1  21   2 25.1528 2.34737  -2 
  -1 -19   2 25.1528 2.34737   1 
   0  21   2 38.7800 2.77594  -2 
   0 -19   2 38.7800 2.77594   1 
  -1  21   2 39.7181 3.39683  -2 
   1 -19   2 39.7181 3.39683   1 
   2 -19   2 1.58538 1.20250   2 
   2 -19   2 1.68970 1.47200   1 
  -8 -18   2 5.30275 1.84356   1 
  -8 -18   2 6.71031 1.77100   2 
   8  20   2 5.79275 3.43864  -2 
  -8 -18   2 5.79275 3.43864   1 
  -7 -18   2 15.9773 2.02812   2 
   7  20   2 24.5110 4.47723  -2 
  -7 -18   2 24.5110 4.47723   1 
  -7 -18   2 12.0995 1.80900   1 
  -6 -18   2 8.80941 1.82848   1 
  -6 -18   2 7.27698 1.78447   2 
   6  20   2 30.1854 3.57559  -2 
  -6 -18   2 30.1854 3.57559   1 
  -5 -18   2 14.7283 2.23365   1 
  -5 -18   2 14.4454 3.63607   2 
   5  20   2 43.5190 3.84630  -2 
  -5 -18   2 43.5190 3.84630   1 
   4  20   2 35.9012 2.60621  -2 
  -4 -18   2 35.9012 2.60621   1 
   3  20   2 28.8421 2.46139  -2 
  -3 -18   2 28.8421 2.46139   1 
  -3 -18   2 22.8382 4.16675   2 
   2  20   2 0.75142 2.27860  -2 
  -2 -18   2 0.75142 2.27860   1 
  -2 -18   2 0.20034 1.83698   1 
  -2 -18   2 4.37951 2.88692   2 
   1  20   2 85.7290 3.38179  -2 
  -1 -18   2 85.7290 3.38179   1 
   0  20   2 21.7374 2.43005  -2 
   0 -18   2 21.7374 2.43005   1 
  -1  20   2 64.8427 3.04955  -2 
   1 -18   2 64.8427 3.04955   1 
  -2  20   2 19.3807 2.75213  -2 
   2 -18   2 19.3807 2.75213   1 
  -3  20   2 49.6080 3.73568  -2 
   3 -18   2 49.6080 3.73568   1 
  -9 -17   2 15.0215 1.88617   2 
   9  19   2 19.7304 6.09241  -2 
  -9 -17   2 19.7304 6.09241   1 
  -9 -17   2 15.8732 2.19596   1 
  -8 -17   2 -2.1800 1.20797   1 
  -8 -17   2 0.10225 1.15770   2 
   8  19   2 10.8176 3.45742  -2 
  -8 -17   2 10.8176 3.45742   1 
   7  19   2 40.4619 3.15064  -2 
  -7 -17   2 40.4619 3.15064   1 
  -7 -17   2 23.1891 3.04278   1 
  -7 -17   2 28.1740 2.29716   2 
  -6 -17   2 35.8474 3.43649   2 
   6  19   2 54.7319 3.36877  -2 
  -6 -17   2 54.7319 3.36877   1 
  -6 -17   2 41.7194 3.53216   1 
   5  19   2 39.0174 2.49375  -2 
  -5 -17   2 39.0174 2.49375   1 
  -5 -17   2 27.4473 3.02900   1 
  -5 -17   2 26.6401 2.98150   2 
   4  19   2 9.47376 2.06344  -2 
  -4 -17   2 9.47376 2.06344   1 
  -4 -17   2 5.38539 1.86622   1 
  -4 -17   2 2.36484 2.54157   2 
   3  19   2 170.861 4.12846  -2 
  -3 -17   2 170.861 4.12846   1 
  -3 -17   2 167.402 9.54837   2 
  -3 -17   2 156.793 9.15242   1 
  -2 -17   2 7.13941 2.12738   1 
   2  19   2 25.9189 2.27141  -2 
  -2 -17   2 25.9189 2.27141   1 
  -2 -17   2 5.18260 1.84178   2 
   1  19   2 4.68659 1.83487  -2 
  -1 -17   2 4.68659 1.83487   1 
   0  19   2 34.0138 2.32189  -2 
   0 -17   2 34.0138 2.32189   1 
  -1  19   2 50.1712 2.56243  -2 
   1 -17   2 50.1712 2.56243   1 
  -2  19   2 0.94962 2.49484  -2 
   2 -17   2 0.94962 2.49484   1 
  -3  19   2 169.719 5.27125  -2 
   3 -17   2 169.719 5.27125   1 
  -4  19   2 129.670 6.92085  -2 
   4 -17   2 129.670 6.92085   1 
   5 -17   2 4.60555 1.63324   2 
   5 -17   2 3.65664 1.66375   1 
 -10 -16   2 14.7405 2.87943   2 
  10  18   2 17.7662 3.15049  -2 
 -10 -16   2 17.7662 3.15049   1 
  -9 -16   2 5.98208 1.43268   1 
  -9 -16   2 4.56609 1.24051   2 
   9  18   2 0.37123 5.64688  -2 
  -9 -16   2 0.37123 5.64688   1 
  -8 -16   2 19.8221 1.66855   1 
  -8 -16   2 20.5768 2.22386   2 
  -7 -16   2 7.61028 1.40673   2 
  -7 -16   2 6.16951 1.70370   1 
   7  18   2 13.1105 2.58267  -2 
  -7 -16   2 13.1105 2.58267   1 
   6  18   2 76.7013 2.97185  -2 
  -6 -16   2 76.7013 2.97185   1 
  -6 -16   2 40.4240 3.34192   2 
  -6 -16   2 39.9983 2.80895   1 
  -5 -16   2 92.6716 4.67016   2 
  -5 -16   2 100.720 3.52663   1 
   5  18   2 108.214 3.77633  -2 
  -5 -16   2 108.214 3.77633   1 
   4  18   2 117.316 3.52402  -2 
  -4 -16   2 117.316 3.52402   1 
  -4 -16   2 109.788 4.25039   1 
  -4 -16   2 108.981 5.02895   2 
   3  18   2 29.3142 2.05748  -2 
  -3 -16   2 29.3142 2.05748   1 
  -3 -16   2 20.6476 2.03058   2 
  -3 -16   2 19.0091 2.38811   1 
  -2 -16   2 22.0497 3.56345   2 
  -2 -16   2 16.1050 2.41321   1 
   2  18   2 106.699 3.12947  -2 
  -2 -16   2 106.699 3.12947   1 
   1  18   2 5.55326 1.83179  -2 
  -1 -16   2 5.55326 1.83179   1 
   0  18   2 87.3336 3.14328  -2 
   0 -16   2 87.3336 3.14328   1 
  -1  18   2 117.425 3.31478  -2 
   1 -16   2 117.425 3.31478   1 
  -2  18   2 147.168 3.59655  -2 
   2 -16   2 147.168 3.59655   1 
  -3  18   2 37.7661 2.63475  -2 
   3 -16   2 37.7661 2.63475   1 
  -4  18   2 115.816 4.70401  -2 
   4 -16   2 115.816 4.70401   1 
  -5  18   2 181.360 6.43998  -2 
   5 -16   2 181.360 6.43998   1 
   6 -16   2 18.7872 2.25776   2 
   6 -16   2 21.2956 2.67125   1 
 -11 -15   2 35.4753 2.09500   2 
 -11 -15   2 31.6066 2.77563   1 
  10  17   2 1.40238 2.49703  -2 
 -10 -15   2 1.40238 2.49703   1 
  -9 -15   2 40.2304 5.22467   1 
  -9 -15   2 41.4099 3.78931   2 
   9  17   2 55.5574 3.09098  -2 
  -9 -15   2 55.5574 3.09098   1 
  -8 -15   2 11.8469 1.51715   2 
   8  17   2 106.743 6.30338  -2 
  -8 -15   2 106.743 6.30338   1 
  -8 -15   2 14.9287 1.62523   1 
  -7 -15   2 17.3534 1.63072   1 
  -7 -15   2 19.0057 1.68878   2 
   7  17   2 115.294 5.31223  -2 
  -7 -15   2 115.294 5.31223   1 
   6  17   2 25.6541 2.31529  -2 
  -6 -15   2 25.6541 2.31529   1 
  -6 -15   2 22.9847 1.95627   1 
  -6 -15   2 21.4398 2.14102   2 
   5  17   2 2.62511 1.75784  -2 
  -5 -15   2 2.62511 1.75784   1 
  -5 -15   2 2.45131 1.34625   1 
  -5 -15   2 0.89185 1.12901   2 
   4  17   2 3.71270 1.70418  -2 
  -4 -15   2 3.71270 1.70418   1 
  -4 -15   2 1.46956 1.22424   2 
  -4 -15   2 -0.2074 1.16515   1 
  -3 -15   2 158.079 4.48381   1 
  -3 -15   2 166.739 6.61552   2 
   3  17   2 192.895 5.13991  -2 
  -3 -15   2 192.895 5.13991   1 
   2  17   2 163.643 3.78805  -2 
  -2 -15   2 163.643 3.78805   1 
  -2 -15   2 130.668 5.81471   1 
  -2 -15   2 124.928 4.40301   2 
   1  17   2 247.501 5.15244  -2 
  -1 -15   2 247.501 5.15244   1 
  -1 -15   2 28.9734 3.95297   1 
  -1 -15   2 33.1031 4.05373   2 
   0  17   2 172.069 3.73341  -2 
   0 -15   2 172.069 3.73341   1 
  -1  17   2 89.0169 2.88130  -2 
   1 -15   2 89.0169 2.88130   1 
   1 -15   2 38.8946 4.07800   1 
  -2  17   2 7.10732 1.71371  -2 
   2 -15   2 7.10732 1.71371   1 
  -3  17   2 41.9347 2.55685  -2 
   3 -15   2 41.9347 2.55685   1 
  -4  17   2 158.476 4.48173  -2 
   4 -15   2 158.476 4.48173   1 
  -5  17   2 201.895 6.80879  -2 
   5 -15   2 201.895 6.80879   1 
  -6  17   2 108.748 5.65137  -2 
   6 -15   2 108.748 5.65137   1 
   7 -15   2 -1.4992 1.84403   2 
   7 -15   2 2.76869 2.44864   1 
  11  16   2 16.6832 3.07822  -2 
 -11 -14   2 16.6832 3.07822   1 
  10  16   2 184.343 5.00863  -2 
 -10 -14   2 184.343 5.00863   1 
   9  16   2 102.631 3.54522  -2 
  -9 -14   2 102.631 3.54522   1 
  -9 -14   2 10.2057 3.52941   2 
   8  16   2 42.3130 3.57596  -2 
  -8 -14   2 42.3130 3.57596   1 
  -8 -14   2 2.68461 0.98437   2 
  -8 -14   2 3.10769 1.06129   1 
  -7 -14   2 23.9540 1.78306   1 
  -7 -14   2 23.7188 1.70734   2 
   7  16   2 24.6784 2.58687  -2 
  -7 -14   2 24.6784 2.58687   1 
   6  16   2 1.91972 2.07426  -2 
  -6 -14   2 1.91972 2.07426   1 
  -6 -14   2 -0.4841 1.01340   2 
  -6 -14   2 -0.4034 0.98494   1 
   5  16   2 19.8963 1.73448  -2 
  -5 -14   2 19.8963 1.73448   1 
  -5 -14   2 2.56335 1.60380   1 
  -5 -14   2 1.35924 1.52828   2 
  -4 -14   2 186.830 5.69191   1 
   4  16   2 221.932 5.08445  -2 
  -4 -14   2 221.932 5.08445   1 
  -4 -14   2 192.694 6.00408   2 
  -3 -14   2 322.498 7.58108   1 
   3  16   2 421.787 9.31164  -2 
  -3 -14   2 421.787 9.31164   1 
  -3 -14   2 330.847 7.80101   2 
   2  16   2 164.249 3.50351  -2 
  -2 -14   2 164.249 3.50351   1 
  -2 -14   2 9.28286 1.31970   2 
  -2 -14   2 5.89279 2.62368   1 
  -1 -14   2 37.5418 2.29743   2 
   1  16   2 36.7088 1.91839  -2 
  -1 -14   2 36.7088 1.91839   1 
  -1 -14   2 31.4994 2.65983   1 
   0  16   2 16.7951 1.62178  -2 
   0 -14   2 16.7951 1.62178   1 
   0 -14   2 14.4956 2.72502   2 
  -1  16   2 13.1700 1.63546  -2 
   1 -14   2 13.1700 1.63546   1 
   1 -14   2 10.9602 2.59660   1 
   2 -14   2 33.4795 4.31739   2 
  -2  16   2 75.8978 2.31307  -2 
   2 -14   2 75.8978 2.31307   1 
  -3  16   2 58.0504 2.42635  -2 
   3 -14   2 58.0504 2.42635   1 
  -4  16   2 312.700 6.94771  -2 
   4 -14   2 312.700 6.94771   1 
  -5  16   2 63.7171 3.75742  -2 
   5 -14   2 63.7171 3.75742   1 
  -6  16   2 119.336 5.78099  -2 
   6 -14   2 119.336 5.78099   1 
  -7  16   2 11.8879 4.72735  -2 
   7 -14   2 11.8879 4.72735   1 
 -12 -13   2 2.29321 1.17659   2 
 -12 -13   2 2.49667 1.51430   1 
 -11 -13   2 94.6029 7.95965   2 
  11  15   2 161.360 5.82848  -2 
 -11 -13   2 161.360 5.82848   1 
  10  15   2 40.5794 2.89392  -2 
 -10 -13   2 40.5794 2.89392   1 
 -10 -13   2 13.6147 3.75602   1 
   9  15   2 42.6628 2.50919  -2 
  -9 -13   2 42.6628 2.50919   1 
  -9 -13   2 17.0161 3.55360   1 
   8  15   2 43.0841 2.66615  -2 
  -8 -13   2 43.0841 2.66615   1 
  -8 -13   2 2.64858 1.10418   1 
  -8 -13   2 0.39668 1.28925   2 
  -7 -13   2 5.00759 1.17336   2 
  -7 -13   2 5.20431 1.15574   1 
   7  15   2 11.4486 2.32014  -2 
  -7 -13   2 11.4486 2.32014   1 
   6  15   2 -3.3634 1.95732  -2 
  -6 -13   2 -3.3634 1.95732   1 
  -6 -13   2 0.99047 0.91866   2 
  -6 -13   2 -0.4095 0.97223   1 
  -5 -13   2 54.2047 2.37559   2 
   5  15   2 188.440 4.14447  -2 
  -5 -13   2 188.440 4.14447   1 
  -5 -13   2 63.2724 3.66535   1 
  -4 -13   2 226.394 4.91178   1 
   4  15   2 263.913 7.54635  -2 
  -4 -13   2 263.913 7.54635   1 
  -4 -13   2 231.239 5.77589   2 
   3  15   2 174.762 5.34292  -2 
  -3 -13   2 174.762 5.34292   1 
  -3 -13   2 39.4509 1.75526   1 
  -3 -13   2 41.3879 2.01758   2 
   2  15   2 289.930 4.86557  -2 
  -2 -13   2 289.930 4.86557   1 
  -2 -13   2 88.9757 4.16034   1 
  -2 -13   2 92.2925 3.42587   2 
  -1 -13   2 1.94721 1.08514   2 
   1  15   2 23.1153 1.67073  -2 
  -1 -13   2 23.1153 1.67073   1 
  -1 -13   2 0.68629 1.45770   1 
   0  15   2 17.4038 1.64328  -2 
   0 -13   2 17.4038 1.64328   1 
   0 -13   2 13.2957 1.93848   1 
   0 -13   2 16.1303 2.79997   2 
  -1  15   2 150.859 3.30881  -2 
   1 -13   2 150.859 3.30881   1 
   1 -13   2 25.3159 3.18589   1 
  -2  15   2 295.798 5.04594  -2 
   2 -13   2 295.798 5.04594   1 
  -3  15   2 103.200 2.62553  -2 
   3 -13   2 103.200 2.62553   1 
  -4  15   2 36.1570 2.30728  -2 
   4 -13   2 36.1570 2.30728   1 
  -5  15   2 231.963 6.29940  -2 
   5 -13   2 231.963 6.29940   1 
  -6  15   2 47.7578 4.00781  -2 
   6 -13   2 47.7578 4.00781   1 
  -7  15   2 17.5734 4.76770  -2 
   7 -13   2 17.5734 4.76770   1 
 -12 -12   2 11.5049 2.38806   1 
  12  14   2 13.1643 6.35485  -2 
 -12 -12   2 13.1643 6.35485   1 
 -11 -12   2 5.20987 3.24419   1 
  11  14   2 15.1164 2.74824  -2 
 -11 -12   2 15.1164 2.74824   1 
  10  14   2 171.055 4.70206  -2 
 -10 -12   2 171.055 4.70206   1 
 -10 -12   2 14.9170 3.69455   2 
  -9 -12   2 57.0552 3.06545   1 
   9  14   2 147.936 4.20195  -2 
  -9 -12   2 147.936 4.20195   1 
  -8 -12   2 -1.2402 1.18779   2 
   8  14   2 3.52749 1.93952  -2 
  -8 -12   2 3.52749 1.93952   1 
  -8 -12   2 1.40943 1.20163   1 
  -7 -12   2 11.1566 1.33734   2 
  -7 -12   2 13.8529 1.43923   1 
   7  14   2 131.050 4.28129  -2 
  -7 -12   2 131.050 4.28129   1 
   6  14   2 68.9415 2.58986  -2 
  -6 -12   2 68.9415 2.58986   1 
  -6 -12   2 30.0275 1.62085   2 
  -6 -12   2 29.0979 2.18535   1 
  -5 -12   2 4.54542 0.90382   2 
  -5 -12   2 4.76788 1.56804   1 
   5  14   2 5.26417 1.44510  -2 
  -5 -12   2 5.26417 1.44510   1 
  -4 -12   2 69.0154 2.15456   1 
  -4 -12   2 71.6120 2.31258   2 
   4  14   2 384.203 7.36583  -2 
  -4 -12   2 384.203 7.36583   1 
  -3 -12   2 147.072 3.56853   2 
  -3 -12   2 143.775 3.47866   1 
   3  14   2 576.950 10.2908  -2 
  -3 -12   2 576.950 10.2908   1 
  -2 -12   2 8.75944 1.35111   2 
  -2 -12   2 9.67127 2.29599   1 
   2  14   2 46.3461 1.50167  -2 
  -2 -12   2 46.3461 1.50167   1 
  -1 -12   2 3.85992 0.95703   2 
   1  14   2 3.15506 1.27295  -2 
  -1 -12   2 3.15506 1.27295   1 
  -1 -12   2 2.08383 1.37968   1 
   0  14   2 114.484 2.60078  -2 
   0 -12   2 114.484 2.60078   1 
   0 -12   2 3.55397 1.14936   1 
   1 -12   2 212.311 7.48244   1 
  -1  14   2 227.057 4.27376  -2 
   1 -12   2 227.057 4.27376   1 
   1 -12   2 220.079 11.2304   2 
  -2  14   2 293.732 4.69391  -2 
   2 -12   2 293.732 4.69391   1 
  -3  14   2 296.189 5.06064  -2 
   3 -12   2 296.189 5.06064   1 
  -4  14   2 204.076 3.95116  -2 
   4 -12   2 204.076 3.95116   1 
  -5  14   2 22.5886 2.58261  -2 
   5 -12   2 22.5886 2.58261   1 
  -6  14   2 126.488 4.76314  -2 
   6 -12   2 126.488 4.76314   1 
  -7  14   2 41.5206 3.90570  -2 
   7 -12   2 41.5206 3.90570   1 
   9 -12   2 33.9067 3.75469   2 
   9 -12   2 41.6521 4.33087   1 
  12  13   2 1.58998 2.61432  -2 
 -12 -11   2 1.58998 2.61432   1 
 -11 -11   2 0.90767 1.41665   1 
  11  13   2 36.4272 3.87635  -2 
 -11 -11   2 36.4272 3.87635   1 
  10  13   2 8.96311 1.92878  -2 
 -10 -11   2 8.96311 1.92878   1 
   9  13   2 9.34009 1.82832  -2 
  -9 -11   2 9.34009 1.82832   1 
  -9 -11   2 3.13386 1.84394   1 
  -8 -11   2 52.1653 2.98898   1 
   8  13   2 71.9122 2.76804  -2 
  -8 -11   2 71.9122 2.76804   1 
   7  13   2 16.9903 1.68784  -2 
  -7 -11   2 16.9903 1.68784   1 
  -7 -11   2 4.00271 1.43153   2 
  -7 -11   2 5.16813 2.06207   1 
  -6 -11   2 4.98638 1.23811   1 
  -6 -11   2 5.94857 0.76606   2 
   6  13   2 5.17516 1.37984  -2 
  -6 -11   2 5.17516 1.37984   1 
   5  13   2 215.793 3.93912  -2 
  -5 -11   2 215.793 3.93912   1 
  -5 -11   2 16.3288 1.57317   1 
  -5 -11   2 14.8763 1.21509   2 
  -4 -11   2 1.71634 0.64099   2 
  -4 -11   2 0.98214 0.56904   1 
   4  13   2 90.9697 2.81679  -2 
  -4 -11   2 90.9697 2.81679   1 
  -3 -11   2 40.9262 1.31613   1 
   3  13   2 56.3549 2.05300  -2 
  -3 -11   2 56.3549 2.05300   1 
  -3 -11   2 42.4192 1.83120   2 
   2  13   2 145.541 2.43582  -2 
  -2 -11   2 145.541 2.43582   1 
  -2 -11   2 55.4423 2.09179   2 
  -2 -11   2 50.7519 2.74138   1 
  -1 -11   2 63.9898 2.58034   2 
   1  13   2 159.682 3.24732  -2 
  -1 -11   2 159.682 3.24732   1 
  -1 -11   2 67.2260 2.31224   1 
   0  13   2 11.9604 1.18660  -2 
   0 -11   2 11.9604 1.18660   1 
   0 -11   2 10.6612 2.28236   2 
   0 -11   2 8.50758 1.19540   1 
  -1  13   2 213.374 3.26856  -2 
   1 -11   2 213.374 3.26856   1 
  -2  13   2 255.714 4.12897  -2 
   2 -11   2 255.714 4.12897   1 
  -3  13   2 62.6610 1.87544  -2 
   3 -11   2 62.6610 1.87544   1 
   3 -11   2 28.0512 2.76626   2 
  -4  13   2 66.6183 2.28356  -2 
   4 -11   2 66.6183 2.28356   1 
  -5  13   2 156.826 6.22686  -2 
   5 -11   2 156.826 6.22686   1 
   5 -11   2 120.489 6.83241   1 
  -6  13   2 117.059 8.10685  -2 
   6 -11   2 117.059 8.10685   1 
   6 -11   2 82.1446 5.54379   1 
   7 -11   2 6.95273 2.38291   1 
  -8  13   2 40.9218 5.68103  -2 
   8 -11   2 40.9218 5.68103   1 
 -13 -10   2 20.4444 2.46777   1 
 -13 -10   2 20.1657 2.05408   2 
 -12 -10   2 -1.5333 1.41363   1 
  12  12   2 -6.0961 5.86920  -2 
 -12 -10   2 -6.0961 5.86920   1 
  11  12   2 3.78793 3.26608  -2 
 -11 -10   2 3.78793 3.26608   1 
 -11 -10   2 8.46974 2.00606   1 
  10  12   2 33.5083 2.23438  -2 
 -10 -10   2 33.5083 2.23438   1 
   9  12   2 255.892 4.99134  -2 
  -9 -10   2 255.892 4.99134   1 
  -9 -10   2 117.923 8.13776   1 
  -9 -10   2 128.918 8.01569   2 
   8  12   2 121.279 3.49529  -2 
  -8 -10   2 121.279 3.49529   1 
  -8 -10   2 106.341 4.08421   1 
  -8 -10   2 97.5172 6.59783   2 
  -7 -10   2 28.3877 1.64269   2 
   7  12   2 100.123 3.40321  -2 
  -7 -10   2 100.123 3.40321   1 
  -7 -10   2 29.4201 1.84822   1 
  -6 -10   2 21.9770 1.28950   2 
   6  12   2 27.0586 1.61184  -2 
  -6 -10   2 27.0586 1.61184   1 
  -6 -10   2 24.2822 1.55963   1 
  -5 -10   2 50.8487 2.02319   2 
  -5 -10   2 51.5414 1.60600   1 
   5  12   2 137.323 3.10201  -2 
  -5 -10   2 137.323 3.10201   1 
  -4 -10   2 9.68566 0.70280   1 
  -4 -10   2 10.2958 0.83543   2 
   4  12   2 23.3030 2.03084  -2 
  -4 -10   2 23.3030 2.03084   1 
  -3 -10   2 128.737 2.75983   2 
   3  12   2 360.427 5.72436  -2 
  -3 -10   2 360.427 5.72436   1 
  -3 -10   2 133.825 3.13291   1 
   2  12   2 523.473 7.46515  -2 
  -2 -10   2 523.473 7.46515   1 
  -2 -10   2 316.434 7.09095   1 
  -2 -10   2 313.928 6.27119   2 
  -1 -10   2 16.6523 1.27636   2 
  -1 -10   2 14.9274 1.43727   1 
   1  12   2 177.500 3.16140  -2 
  -1 -10   2 177.500 3.16140   1 
   0 -10   2 82.9099 3.43779   2 
   0 -10   2 78.4061 3.31848   1 
   0  12   2 122.372 2.24026  -2 
   0 -10   2 122.372 2.24026   1 
  -1  12   2 26.3293 1.20241  -2 
   1 -10   2 26.3293 1.20241   1 
   1 -10   2 16.7322 1.81417   2 
   1 -10   2 15.3031 1.70436   1 
  -2  12   2 76.2308 1.89958  -2 
   2 -10   2 76.2308 1.89958   1 
   2 -10   2 41.5465 2.48031   1 
   2 -10   2 41.5052 2.97962   2 
  -3  12   2 372.158 5.16752  -2 
   3 -10   2 372.158 5.16752   1 
   3 -10   2 18.0560 2.31508   2 
  -4  12   2 142.541 3.47942  -2 
   4 -10   2 142.541 3.47942   1 
   4 -10   2 67.5135 4.45578   1 
  -5  12   2 6.18671 1.67069  -2 
   5 -10   2 6.18671 1.67069   1 
  -6  12   2 30.5466 3.31890  -2 
   6 -10   2 30.5466 3.31890   1 
 -10  12   2 111.421 8.37656  -2 
  10 -10   2 111.421 8.37656   1 
 -13  -9   2 31.7939 3.28553   1 
  12  11   2 62.8282 3.40414  -2 
 -12  -9   2 62.8282 3.40414   1 
  11  11   2 30.1948 2.66777  -2 
 -11  -9   2 30.1948 2.66777   1 
  10  11   2 68.1648 2.68452  -2 
 -10  -9   2 68.1648 2.68452   1 
 -10  -9   2 7.86188 2.21042   2 
  -9  -9   2 174.778 9.64954   2 
   9  11   2 198.737 3.95006  -2 
  -9  -9   2 198.737 3.95006   1 
  -8  -9   2 33.2765 2.89016   2 
   8  11   2 43.7908 1.82720  -2 
  -8  -9   2 43.7908 1.82720   1 
  -7  -9   2 2.75001 0.99498   1 
   7  11   2 6.16156 1.48621  -2 
  -7  -9   2 6.16156 1.48621   1 
  -7  -9   2 2.72515 1.00462   2 
  -6  -9   2 107.938 2.89712   2 
  -6  -9   2 112.339 2.97205   1 
   6  11   2 161.846 3.38714  -2 
  -6  -9   2 161.846 3.38714   1 
   5  11   2 6.49612 1.16925  -2 
  -5  -9   2 6.49612 1.16925   1 
  -5  -9   2 4.38850 0.63332   2 
  -5  -9   2 4.25850 0.77588   1 
  -4  -9   2 6.39891 0.62589   1 
  -4  -9   2 5.45031 0.60732   2 
   4  11   2 62.9734 2.24364  -2 
  -4  -9   2 62.9734 2.24364   1 
   3  11   2 148.109 2.42383  -2 
  -3  -9   2 148.109 2.42383   1 
  -3  -9   2 121.043 2.41069   2 
  -3  -9   2 119.244 3.58689   1 
  -2  -9   2 143.066 2.53787   2 
  -2  -9   2 136.755 2.32784   1 
   2  11   2 350.853 7.05936  -2 
  -2  -9   2 350.853 7.05936   1 
  -1  -9   2 125.889 2.69824   2 
  -1  -9   2 120.381 3.31881   1 
   1  11   2 327.552 5.41683  -2 
  -1  -9   2 327.552 5.41683   1 
   0  11   2 13.0147 1.10631  -2 
   0  -9   2 13.0147 1.10631   1 
   0  -9   2 8.74973 0.78734   1 
   0  -9   2 11.4297 1.20303   2 
   1  -9   2 22.8376 2.05867   2 
  -1  11   2 26.4035 1.29368  -2 
   1  -9   2 26.4035 1.29368   1 
   1  -9   2 23.0367 1.17387   1 
   2  -9   2 83.0686 3.02581   2 
  -2  11   2 411.696 6.90975  -2 
   2  -9   2 411.696 6.90975   1 
   2  -9   2 84.9925 2.29401   1 
  -3  11   2 40.0782 1.42195  -2 
   3  -9   2 40.0782 1.42195   1 
   3  -9   2 17.2594 2.84137   2 
   3  -9   2 18.2054 2.56155   1 
  -4  11   2 39.2740 1.47050  -2 
   4  -9   2 39.2740 1.47050   1 
   4  -9   2 1.00663 1.53967   2 
  -5  11   2 315.561 5.72908  -2 
   5  -9   2 315.561 5.72908   1 
   5  -9   2 159.682 7.80771   2 
  -6  11   2 58.5308 3.13474  -2 
   6  -9   2 58.5308 3.13474   1 
  -7  11   2 206.178 10.6052  -2 
   7  -9   2 206.178 10.6052   1 
 -13  -8   2 66.7337 4.54485   1 
  12  10   2 173.326 5.46291  -2 
 -12  -8   2 173.326 5.46291   1 
  11  10   2 17.9779 2.50878  -2 
 -11  -8   2 17.9779 2.50878   1 
  10  10   2 141.232 3.74207  -2 
 -10  -8   2 141.232 3.74207   1 
   9  10   2 403.257 7.67235  -2 
  -9  -8   2 403.257 7.67235   1 
   8  10   2 183.547 3.41199  -2 
  -8  -8   2 183.547 3.41199   1 
  -8  -8   2 161.777 9.48745   2 
  -7  -8   2 126.423 3.18400   1 
   7  10   2 162.847 3.50973  -2 
  -7  -8   2 162.847 3.50973   1 
  -7  -8   2 121.598 4.97229   2 
  -6  -8   2 254.120 4.51259   1 
  -6  -8   2 260.776 5.49124   2 
   6  10   2 425.415 8.74287  -2 
  -6  -8   2 425.415 8.74287   1 
  -5  -8   2 56.6156 1.51854   2 
  -5  -8   2 55.9116 1.46811   1 
   5  10   2 64.1286 2.14608  -2 
  -5  -8   2 64.1286 2.14608   1 
  -4  -8   2 34.3527 1.10222   2 
   4  10   2 50.8029 1.60665  -2 
  -4  -8   2 50.8029 1.60665   1 
  -4  -8   2 34.5270 1.20397   1 
  -3  -8   2 612.962 8.17582   2 
   3  10   2 978.025 13.1659  -2 
  -3  -8   2 978.025 13.1659   1 
  -3  -8   2 627.040 12.5161   1 
  -2  -8   2 399.948 5.60727   1 
   2  10   2 1013.79 20.0144  -2 
  -2  -8   2 1013.79 20.0144   1 
  -2  -8   2 392.907 5.05521   2 
  -1  -8   2 7.50789 0.58514   2 
  -1  -8   2 7.99565 0.65309   1 
   1  10   2 81.9129 2.14117  -2 
  -1  -8   2 81.9129 2.14117   1 
   0  -8   2 81.6828 2.92183   2 
   0  10   2 145.021 2.55186  -2 
   0  -8   2 145.021 2.55186   1 
   0  -8   2 80.2403 2.01765   1 
   1  -8   2 61.4789 1.59268   2 
  -1  10   2 87.0682 1.76087  -2 
   1  -8   2 87.0682 1.76087   1 
   1  -8   2 63.4243 1.88207   1 
   2  -8   2 99.7807 3.12763   1 
  -2  10   2 107.575 2.09334  -2 
   2  -8   2 107.575 2.09334   1 
   2  -8   2 101.767 4.13699   2 
  -3  10   2 242.784 3.92783  -2 
   3  -8   2 242.784 3.92783   1 
   3  -8   2 131.686 4.89213   2 
   3  -8   2 134.455 3.95734   1 
  -4  10   2 1268.73 16.5613  -2 
   4  -8   2 1268.73 16.5613   1 
   4  -8   2 373.880 16.3845   2 
  -5  10   2 119.636 2.82837  -2 
   5  -8   2 119.636 2.82837   1 
  -6  10   2 7.71473 2.03830  -2 
   6  -8   2 7.71473 2.03830   1 
  -7  10   2 8.84531 2.76202  -2 
   7  -8   2 8.84531 2.76202   1 
  -9  10   2 89.0403 6.98899  -2 
   9  -8   2 89.0403 6.98899   1 
  11  -8   2 110.613 7.06643   1 
  11  -8   2 100.163 6.10368   2 
  13   9   2 193.675 7.71114  -2 
 -13  -7   2 193.675 7.71114   1 
  12   9   2 89.0388 4.24185  -2 
 -12  -7   2 89.0388 4.24185   1 
  11   9   2 150.935 4.36006  -2 
 -11  -7   2 150.935 4.36006   1 
  10   9   2 179.536 4.29121  -2 
 -10  -7   2 179.536 4.29121   1 
   9   9   2 165.615 3.94068  -2 
  -9  -7   2 165.615 3.94068   1 
   8   9   2 25.1937 1.50339  -2 
  -8  -7   2 25.1937 1.50339   1 
   7   9   2 386.474 5.09879  -2 
  -7  -7   2 386.474 5.09879   1 
  -7  -7   2 334.759 18.1450   2 
  -6  -7   2 224.130 4.20962   1 
   6   9   2 275.006 5.15980  -2 
  -6  -7   2 275.006 5.15980   1 
  -6  -7   2 226.141 4.44289   2 
  -5  -7   2 302.831 4.41530   2 
   5   9   2 713.982 13.0671  -2 
  -5  -7   2 713.982 13.0671   1 
  -5  -7   2 300.670 4.72717   1 
   4   9   2 1346.02 21.5445  -2 
  -4  -7   2 1346.02 21.5445   1 
  -4  -7   2 375.454 5.57832   2 
  -4  -7   2 373.415 6.05358   1 
  -3  -7   2 221.240 3.20640   1 
  -3  -7   2 218.964 3.09211   2 
   3   9   2 411.784 9.28888  -2 
  -3  -7   2 411.784 9.28888   1 
  -2  -7   2 7.48723 0.46600   2 
  -2  -7   2 7.33396 0.45076   1 
   2   9   2 119.250 4.18469  -2 
  -2  -7   2 119.250 4.18469   1 
  -1  -7   2 42.8668 1.12025   1 
  -1  -7   2 40.5016 1.01270   2 
   1   9   2 208.894 4.14401  -2 
  -1  -7   2 208.894 4.14401   1 
   0   9   2 296.142 5.10766  -2 
   0  -7   2 296.142 5.10766   1 
   1  -7   2 273.897 4.51153   1 
   1  -7   2 276.287 4.35135   2 
  -1   9   2 563.348 10.2067  -2 
   1  -7   2 563.348 10.2067   1 
  -2   9   2 1213.58 17.1042  -2 
   2  -7   2 1213.58 17.1042   1 
   2  -7   2 876.680 15.6908   1 
   2  -7   2 882.263 18.5861   2 
  -3   9   2 935.455 11.1178  -2 
   3  -7   2 935.455 11.1178   1 
   3  -7   2 308.644 7.15568   2 
  -4   9   2 178.464 2.82817  -2 
   4  -7   2 178.464 2.82817   1 
  -5   9   2 390.842 6.02060  -2 
   5  -7   2 390.842 6.02060   1 
  -6   9   2 34.7273 2.02414  -2 
   6  -7   2 34.7273 2.02414   1 
  -7   9   2 30.3941 2.91947  -2 
   7  -7   2 30.3941 2.91947   1 
  -8   9   2 224.960 8.04655  -2 
   8  -7   2 224.960 8.04655   1 
  -9   9   2 175.387 10.0701  -2 
   9  -7   2 175.387 10.0701   1 
 -10   9   2 65.1061 4.45880  -2 
  10  -7   2 65.1061 4.45880   1 
 -11   9   2 111.576 8.13344  -2 
  11  -7   2 111.576 8.13344   1 
  13   8   2 47.3879 3.97519  -2 
 -13  -6   2 47.3879 3.97519   1 
  12   8   2 116.705 6.89827  -2 
 -12  -6   2 116.705 6.89827   1 
 -12  -6   2 77.5839 4.95159   1 
  11   8   2 133.213 3.75117  -2 
 -11  -6   2 133.213 3.75117   1 
  10   8   2 41.3879 2.26925  -2 
 -10  -6   2 41.3879 2.26925   1 
   9   8   2 106.120 3.03773  -2 
  -9  -6   2 106.120 3.03773   1 
   8   8   2 25.9665 1.64098  -2 
  -8  -6   2 25.9665 1.64098   1 
  -8  -6   2 4.26670 2.39054   2 
  -8  -6   2 7.24408 2.67152   1 
  -7  -6   2 31.7194 2.18299   2 
   7   8   2 39.1596 1.43817  -2 
  -7  -6   2 39.1596 1.43817   1 
  -7  -6   2 27.2936 1.77869   1 
   6   8   2 1095.64 15.1391  -2 
  -6  -6   2 1095.64 15.1391   1 
  -6  -6   2 639.959 13.8185   2 
  -6  -6   2 613.349 14.5275   1 
  -5  -6   2 125.558 2.20030   2 
  -5  -6   2 122.552 2.03449   1 
   5   8   2 509.320 11.6956  -2 
  -5  -6   2 509.320 11.6956   1 
  -4  -6   2 294.335 3.61547   2 
  -4  -6   2 289.486 4.16253   1 
   4   8   2 490.726 10.3429  -2 
  -4  -6   2 490.726 10.3429   1 
  -3  -6   2 44.0577 0.90014   1 
  -3  -6   2 43.4719 0.90830   2 
   3   8   2 378.425 16.0034  -2 
  -3  -6   2 378.425 16.0034   1 
  -2  -6   2 166.667 2.45504   1 
   2   8   2 688.176 17.0927  -2 
  -2  -6   2 688.176 17.0927   1 
  -2  -6   2 167.430 2.15891   2 
  -1  -6   2 0.91760 0.31139   2 
   1   8   2 55.5779 3.24112  -2 
  -1  -6   2 55.5779 3.24112   1 
  -1  -6   2 0.78726 0.28590   1 
   0  -6   2 735.575 12.1280   2 
   0   8   2 1027.03 15.6431  -2 
   0  -6   2 1027.03 15.6431   1 
   0  -6   2 725.972 13.9776   1 
   1  -6   2 326.046 5.11423   1 
  -1   8   2 358.121 7.60693  -2 
   1  -6   2 358.121 7.60693   1 
   1  -6   2 325.701 6.23133   2 
   2  -6   2 204.280 3.29311   1 
   2  -6   2 206.304 3.83615   2 
  -2   8   2 518.136 9.24813  -2 
   2  -6   2 518.136 9.24813   1 
   3  -6   2 88.2673 2.38812   1 
  -3   8   2 124.458 2.20870  -2 
   3  -6   2 124.458 2.20870   1 
   3  -6   2 85.9401 4.10418   2 
  -4   8   2 943.821 11.7521  -2 
   4  -6   2 943.821 11.7521   1 
   4  -6   2 123.682 6.71790   1 
  -5   8   2 41.4463 1.43086  -2 
   5  -6   2 41.4463 1.43086   1 
   5  -6   2 41.0315 2.87007   2 
  -6   8   2 201.486 3.96229  -2 
   6  -6   2 201.486 3.96229   1 
   6  -6   2 53.8937 3.53600   2 
   7  -6   2 109.606 5.85312   2 
  -7   8   2 123.710 4.34728  -2 
   7  -6   2 123.710 4.34728   1 
  -8   8   2 54.2101 3.59479  -2 
   8  -6   2 54.2101 3.59479   1 
   8  -6   2 1.71308 1.50966   2 
  -9   8   2 61.1492 3.95486  -2 
   9  -6   2 61.1492 3.95486   1 
 -10   8   2 292.822 10.2088  -2 
  10  -6   2 292.822 10.2088   1 
 -11   8   2 103.830 7.60421  -2 
  11  -6   2 103.830 7.60421   1 
  13   7   2 89.4537 5.03403  -2 
 -13  -5   2 89.4537 5.03403   1 
 -12  -5   2 57.6825 4.18830   1 
  12   7   2 186.045 12.0510  -2 
 -12  -5   2 186.045 12.0510   1 
  11   7   2 35.7308 2.96257  -2 
 -11  -5   2 35.7308 2.96257   1 
  10   7   2 -6.3263 1.95648  -2 
 -10  -5   2 -6.3263 1.95648   1 
   9   7   2 3.50657 1.53769  -2 
  -9  -5   2 3.50657 1.53769   1 
   8   7   2 57.4168 2.07490  -2 
  -8  -5   2 57.4168 2.07490   1 
  -8  -5   2 4.26185 1.83098   1 
   7   7   2 310.412 5.39326  -2 
  -7  -5   2 310.412 5.39326   1 
  -7  -5   2 287.362 6.82046   2 
  -7  -5   2 278.878 6.97334   1 
  -6  -5   2 56.7565 1.32405   2 
   6   7   2 80.2941 2.74172  -2 
  -6  -5   2 80.2941 2.74172   1 
  -6  -5   2 57.8604 1.32026   1 
  -5  -5   2 80.0483 1.43433   1 
   5   7   2 598.010 15.7871  -2 
  -5  -5   2 598.010 15.7871   1 
  -5  -5   2 79.1850 1.48860   2 
  -4  -5   2 204.460 2.61005   2 
  -4  -5   2 205.887 2.78065   1 
   4   7   2 427.579 18.8623  -2 
  -4  -5   2 427.579 18.8623   1 
  -3  -5   2 128.832 1.83865   2 
  -3  -5   2 127.747 1.75019   1 
   2   7   2 1538.52 24.9905  -2 
  -2  -5   2 1538.52 24.9905   1 
  -2  -5   2 903.247 11.2750   2 
  -2  -5   2 917.120 14.4090   1 
  -1  -5   2 116.927 1.87485   2 
  -1  -5   2 118.485 1.83532   1 
   1   7   2 120.780 3.94574  -2 
  -1  -5   2 120.780 3.94574   1 
   0  -5   2 15.0594 0.52552   1 
   0  -5   2 16.7566 0.67996   2 
   0   7   2 206.169 6.21978  -2 
   0  -5   2 206.169 6.21978   1 
  -1   7   2 1941.21 44.2381  -2 
   1  -5   2 1941.21 44.2381   1 
   1  -5   2 211.674 3.75434   2 
   1  -5   2 205.510 3.56797   1 
  -2   7   2 1112.35 22.1189  -2 
   2  -5   2 1112.35 22.1189   1 
   2  -5   2 641.543 9.10386   1 
   2  -5   2 637.899 9.84072   2 
   3  -5   2 279.348 6.88873   2 
  -3   7   2 544.770 8.02269  -2 
   3  -5   2 544.770 8.02269   1 
   3  -5   2 277.314 5.29480   1 
  -4   7   2 209.398 2.82648  -2 
   4  -5   2 209.398 2.82648   1 
   4  -5   2 144.070 4.78315   2 
  -5   7   2 416.378 5.34265  -2 
   5  -5   2 416.378 5.34265   1 
   5  -5   2 136.251 10.6320   2 
  -6   7   2 236.165 3.61342  -2 
   6  -5   2 236.165 3.61342   1 
  -7   7   2 591.417 11.6524  -2 
   7  -5   2 591.417 11.6524   1 
  -8   7   2 258.323 9.28330  -2 
   8  -5   2 258.323 9.28330   1 
  -9   7   2 188.640 7.17951  -2 
   9  -5   2 188.640 7.17951   1 
 -10   7   2 13.5680 4.82891  -2 
  10  -5   2 13.5680 4.82891   1 
  11  -5   2 3.07846 1.81448   2 
 -11   7   2 15.9880 4.93958  -2 
  11  -5   2 15.9880 4.93958   1 
 -12   7   2 50.4208 6.10502  -2 
  12  -5   2 50.4208 6.10502   1 
  13   6   2 31.2114 4.48552  -2 
 -13  -4   2 31.2114 4.48552   1 
  12   6   2 13.7322 3.63147  -2 
 -12  -4   2 13.7322 3.63147   1 
  11   6   2 6.44162 3.22690  -2 
 -11  -4   2 6.44162 3.22690   1 
  10   6   2 5.77266 2.12062  -2 
 -10  -4   2 5.77266 2.12062   1 
   9   6   2 42.1355 1.97199  -2 
  -9  -4   2 42.1355 1.97199   1 
   8   6   2 12.9423 1.41049  -2 
  -8  -4   2 12.9423 1.41049   1 
   7   6   2 35.7486 1.42849  -2 
  -7  -4   2 35.7486 1.42849   1 
  -7  -4   2 16.2901 1.54174   2 
  -7  -4   2 17.4754 1.93368   1 
  -6  -4   2 -0.0797 0.37858   2 
   6   6   2 90.6263 2.63296  -2 
  -6  -4   2 90.6263 2.63296   1 
  -6  -4   2 0.60587 0.43419   1 
  -5  -4   2 15.5297 0.59741   2 
  -5  -4   2 15.7657 0.57066   1 
  -4  -4   2 161.111 2.14368   2 
  -4  -4   2 159.960 2.24119   1 
   4   6   2 172.154 8.07209  -2 
  -4  -4   2 172.154 8.07209   1 
  -3  -4   2 8.12908 0.41072   2 
  -3  -4   2 9.02848 0.44292   1 
   3   6   2 175.276 8.01231  -2 
  -3  -4   2 175.276 8.01231   1 
  -2  -4   2 26.2282 0.55782   1 
  -2  -4   2 25.9083 0.56412   2 
  -1  -4   2 27.5172 0.59061   2 
   1   6   2 212.028 5.22182  -2 
  -1  -4   2 212.028 5.22182   1 
  -1  -4   2 27.8982 0.66058   1 
   0  -4   2 434.986 6.14931   2 
   0   6   2 1096.95 43.9901  -2 
   0  -4   2 1096.95 43.9901   1 
   0  -4   2 433.105 5.74893   1 
   1  -4   2 58.4397 1.16447   1 
   1  -4   2 57.2325 1.18624   2 
  -1   6   2 294.217 6.16872  -2 
   1  -4   2 294.217 6.16872   1 
   2  -4   2 468.349 6.51097   2 
   2  -4   2 473.188 6.08627   1 
  -2   6   2 872.214 33.1844  -2 
   2  -4   2 872.214 33.1844   1 
   3  -4   2 201.278 2.84675   1 
  -3   6   2 406.300 9.93340  -2 
   3  -4   2 406.300 9.93340   1 
   3  -4   2 200.785 2.98881   2 
  -4   6   2 175.782 2.97641  -2 
   4  -4   2 175.782 2.97641   1 
   4  -4   2 64.8618 1.89598   2 
   4  -4   2 66.6425 1.83654   1 
  -5   6   2 253.872 3.63319  -2 
   5  -4   2 253.872 3.63319   1 
   5  -4   2 28.6180 2.99948   1 
   5  -4   2 23.4243 4.04179   2 
  -6   6   2 1399.52 17.2640  -2 
   6  -4   2 1399.52 17.2640   1 
  -7   6   2 217.549 3.58141  -2 
   7  -4   2 217.549 3.58141   1 
  -8   6   2 411.975 13.4965  -2 
   8  -4   2 411.975 13.4965   1 
  -9   6   2 3.64377 2.65769  -2 
   9  -4   2 3.64377 2.65769   1 
 -10   6   2 102.201 7.12725  -2 
  10  -4   2 102.201 7.12725   1 
 -11   6   2 72.4838 6.64512  -2 
  11  -4   2 72.4838 6.64512   1 
  12  -4   2 2.66883 1.78337   2 
 -12   6   2 72.3158 6.82588  -2 
  12  -4   2 72.3158 6.82588   1 
  13   5   2 105.381 6.77824  -2 
 -13  -3   2 105.381 6.77824   1 
  12   5   2 99.0200 6.32854  -2 
 -12  -3   2 99.0200 6.32854   1 
  11   5   2 53.5226 3.38667  -2 
 -11  -3   2 53.5226 3.38667   1 
  10   5   2 31.2225 2.96677  -2 
 -10  -3   2 31.2225 2.96677   1 
   9   5   2 59.6146 2.35988  -2 
  -9  -3   2 59.6146 2.35988   1 
   8   5   2 76.7241 1.96042  -2 
  -8  -3   2 76.7241 1.96042   1 
   7   5   2 49.7316 1.80800  -2 
  -7  -3   2 49.7316 1.80800   1 
  -7  -3   2 11.5652 1.20467   1 
  -7  -3   2 12.6634 1.98978   2 
  -6  -3   2 16.0897 0.72108   1 
   6   5   2 12.6021 2.52274  -2 
  -6  -3   2 12.6021 2.52274   1 
  -6  -3   2 14.7804 0.78278   2 
  -5  -3   2 93.7195 1.43379   1 
  -5  -3   2 95.0399 1.48009   2 
   5   5   2 154.707 11.2721  -2 
  -5  -3   2 154.707 11.2721   1 
  -4  -3   2 712.268 7.78772   2 
  -4  -3   2 701.628 8.10719   1 
  -3  -3   2 647.948 7.80524   2 
  -3  -3   2 647.002 7.42578   1 
  -2  -3   2 369.628 4.47711   2 
  -2  -3   2 368.356 4.45659   1 
  -1  -3   2 162.577 2.05759   2 
  -1  -3   2 160.937 2.14000   1 
   0  -3   2 0.81334 0.20531   1 
   0  -3   2 0.66704 0.19729   2 
   1  -3   2 29.8995 0.59325   1 
   1  -3   2 30.5088 0.69519   2 
   2  -3   2 619.718 7.43586   1 
   2  -3   2 615.098 7.90473   2 
   3  -3   2 678.140 7.93692   1 
   3  -3   2 662.404 7.99676   2 
  -4   5   2 34.9356 2.02484  -2 
   4  -3   2 34.9356 2.02484   1 
   4  -3   2 18.7520 0.72128   2 
   4  -3   2 18.3560 0.64350   1 
   5  -3   2 22.1718 1.44639   2 
  -5   5   2 420.206 6.20230  -2 
   5  -3   2 420.206 6.20230   1 
   5  -3   2 24.1926 1.09590   1 
  -6   5   2 128.807 2.18520  -2 
   6  -3   2 128.807 2.18520   1 
  -7   5   2 126.489 2.39557  -2 
   7  -3   2 126.489 2.39557   1 
  -8   5   2 392.515 8.12258  -2 
   8  -3   2 392.515 8.12258   1 
  -9   5   2 256.661 8.80056  -2 
   9  -3   2 256.661 8.80056   1 
 -10   5   2 3.50151 3.95165  -2 
  10  -3   2 3.50151 3.95165   1 
 -11   5   2 105.647 7.44995  -2 
  11  -3   2 105.647 7.44995   1 
 -12   5   2 -0.5014 4.93497  -2 
  12  -3   2 -0.5014 4.93497   1 
  13   4   2 18.7809 4.14645  -2 
 -13  -2   2 18.7809 4.14645   1 
  12   4   2 50.0643 4.84642  -2 
 -12  -2   2 50.0643 4.84642   1 
  11   4   2 43.3200 3.06793  -2 
 -11  -2   2 43.3200 3.06793   1 
  10   4   2 261.946 6.69405  -2 
 -10  -2   2 261.946 6.69405   1 
   9   4   2 69.8049 2.93580  -2 
  -9  -2   2 69.8049 2.93580   1 
  -8  -2   2 148.014 8.72635   1 
   8   4   2 192.084 3.14026  -2 
  -8  -2   2 192.084 3.14026   1 
  -7  -2   2 123.651 3.91498   2 
   7   4   2 189.817 3.17056  -2 
  -7  -2   2 189.817 3.17056   1 
  -7  -2   2 117.035 6.12391   1 
   6   4   2 4.79827 1.40279  -2 
  -6  -2   2 4.79827 1.40279   1 
  -6  -2   2 3.01392 0.51295   2 
  -6  -2   2 3.66176 0.54495   1 
  -5  -2   2 20.4927 0.64203   2 
  -5  -2   2 19.1501 0.66346   1 
  -4  -2   2 666.100 7.70457   1 
  -4  -2   2 671.873 7.98473   2 
  -3  -2   2 534.779 6.18245   2 
  -3  -2   2 533.544 6.39982   1 
  -1  -2   2 127.016 1.69230   1 
  -1  -2   2 127.714 1.62632   2 
   0  -2   2 13.8181 0.39670   2 
   0  -2   2 13.2688 0.36009   1 
   1  -2   2 0.41343 0.20341   1 
   1  -2   2 0.61253 0.21595   2 
  -1   4   2 24.9148 2.09678  -2 
   1  -2   2 24.9148 2.09678   1 
   2  -2   2 896.023 10.6853   1 
   2  -2   2 897.831 11.6351   2 
   3  -2   2 251.942 3.22031   2 
   3  -2   2 253.379 3.32191   1 
   4  -2   2 166.204 2.41636   2 
   4  -2   2 167.860 2.24599   1 
  -5   4   2 273.206 6.60540  -2 
   5  -2   2 273.206 6.60540   1 
   5  -2   2 171.501 2.52012   1 
   5  -2   2 170.211 2.61292   2 
  -6   4   2 97.9174 1.80557  -2 
   6  -2   2 97.9174 1.80557   1 
   6  -2   2 57.7992 5.22844   1 
   6  -2   2 50.5664 4.24822   2 
  -7   4   2 939.108 11.8831  -2 
   7  -2   2 939.108 11.8831   1 
  -8   4   2 29.3090 1.54103  -2 
   8  -2   2 29.3090 1.54103   1 
  -9   4   2 40.9121 4.55888  -2 
   9  -2   2 40.9121 4.55888   1 
 -10   4   2 78.7139 4.32160  -2 
  10  -2   2 78.7139 4.32160   1 
 -11   4   2 154.049 9.01725  -2 
  11  -2   2 154.049 9.01725   1 
 -12   4   2 70.0986 6.47673  -2 
  12  -2   2 70.0986 6.47673   1 
  13  -2   2 71.8291 4.83315   2 
  13  -2   2 95.8785 4.72985   1 
  13   3   2 142.505 8.08173  -2 
 -13  -1   2 142.505 8.08173   1 
  12   3   2 108.417 6.77005  -2 
 -12  -1   2 108.417 6.77005   1 
  11   3   2 172.036 6.78796  -2 
 -11  -1   2 172.036 6.78796   1 
  10   3   2 108.320 3.75236  -2 
 -10  -1   2 108.320 3.75236   1 
   9   3   2 8.28618 1.80971  -2 
  -9  -1   2 8.28618 1.80971   1 
   8   3   2 81.3969 2.12328  -2 
  -8  -1   2 81.3969 2.12328   1 
   7   3   2 416.622 5.66257  -2 
  -7  -1   2 416.622 5.66257   1 
  -7  -1   2 286.353 7.79066   2 
  -6  -1   2 106.850 1.97688   1 
   6   3   2 132.919 4.70287  -2 
  -6  -1   2 132.919 4.70287   1 
  -6  -1   2 109.264 1.68289   2 
  -5  -1   2 395.240 5.28781   1 
  -5  -1   2 406.279 5.08504   2 
  -4  -1   2 331.796 4.41904   1 
  -4  -1   2 338.385 4.74799   2 
  -3  -1   2 318.193 4.12149   1 
  -3  -1   2 324.322 4.03633   2 
  -2  -1   2 250.680 3.07436   2 
  -2  -1   2 249.181 3.19975   1 
  -1  -1   2 1376.63 17.3505   1 
  -1  -1   2 1376.31 17.2435   2 
   0  -1   2 48.8679 0.78520   2 
   0  -1   2 47.4502 0.72330   1 
   1  -1   2 0.72690 0.18699   1 
   1  -1   2 0.93112 0.19793   2 
   2  -1   2 563.271 7.00310   2 
   2  -1   2 566.182 7.46622   1 
   3  -1   2 67.4076 1.06768   2 
   3  -1   2 67.8489 1.08891   1 
   4  -1   2 8.74865 0.47603   2 
   4  -1   2 8.54109 0.45372   1 
   5  -1   2 199.593 2.52374   1 
   5  -1   2 201.898 2.80029   2 
   6  -1   2 157.757 2.89694   1 
   6  -1   2 156.821 3.76025   2 
  -6   3   2 218.385 6.45550  -2 
   6  -1   2 218.385 6.45550   1 
  -7   3   2 65.0833 1.88069  -2 
   7  -1   2 65.0833 1.88069   1 
  -8   3   2 539.223 8.92570  -2 
   8  -1   2 539.223 8.92570   1 
  -9   3   2 275.032 9.54314  -2 
   9  -1   2 275.032 9.54314   1 
 -10   3   2 25.2039 4.31666  -2 
  10  -1   2 25.2039 4.31666   1 
 -11   3   2 65.7095 4.19855  -2 
  11  -1   2 65.7095 4.19855   1 
 -12   3   2 22.9149 4.96096  -2 
  12  -1   2 22.9149 4.96096   1 
 -13   3   2 32.5360 4.05603  -2 
  13  -1   2 32.5360 4.05603   1 
  13   2   2 185.675 9.67584  -2 
 -13   0   2 185.675 9.67584   1 
  12   2   2 77.2238 5.69315  -2 
 -12   0   2 77.2238 5.69315   1 
  11   2   2 35.2197 3.38143  -2 
 -11   0   2 35.2197 3.38143   1 
  10   2   2 81.1375 3.69780  -2 
 -10   0   2 81.1375 3.69780   1 
   9   2   2 165.167 4.00648  -2 
  -9   0   2 165.167 4.00648   1 
   8   2   2 772.657 10.4558  -2 
  -8   0   2 772.657 10.4558   1 
  -7   0   2 225.408 8.79698   1 
   7   2   2 520.123 7.64636  -2 
  -7   0   2 520.123 7.64636   1 
  -6   0   2 707.171 8.86331   2 
  -6   0   2 704.334 9.73877   1 
   6   2   2 697.667 16.0352  -2 
  -6   0   2 697.667 16.0352   1 
  -5   0   2 2.09316 0.40848   1 
  -5   0   2 3.65992 0.39194   2 
  -4   0   2 923.271 11.6232   1 
  -4   0   2 925.436 11.6671   2 
  -3   0   2 19.6131 0.57074   2 
  -3   0   2 19.5394 0.54936   1 
  -2   0   2 1321.29 17.0982   2 
  -2   0   2 1310.84 16.9455   1 
  -1   0   2 1761.17 23.5574   2 
  -1   0   2 1730.91 21.6182   1 
   0   0   2 2433.80 53.6544   1 
   0   0   2 2579.93 68.9819   2 
   1   0   2 1603.90 22.8513   1 
   1   0   2 1628.04 21.7799   2 
   2   0   2 950.641 12.3618   1 
   2   0   2 951.625 11.6731   2 
   3   0   2 0.15778 0.22887   1 
   3   0   2 0.39171 0.24389   2 
   4   0   2 641.994 7.64657   1 
   4   0   2 638.269 7.74577   2 
   5   0   2 23.9275 0.67969   2 
   5   0   2 23.4777 0.69338   1 
  -5   2   2 39.0404 2.81314  -2 
   5   0   2 39.0404 2.81314   1 
   6   0   2 167.133 2.90275   1 
  -6   2   2 282.290 5.75443  -2 
   6   0   2 282.290 5.75443   1 
   6   0   2 158.394 3.44001   2 
  -7   2   2 1693.45 20.7670  -2 
   7   0   2 1693.45 20.7670   1 
  -8   2   2 238.161 4.30996  -2 
   8   0   2 238.161 4.30996   1 
  -9   2   2 28.6313 3.15717  -2 
   9   0   2 28.6313 3.15717   1 
 -10   2   2 80.9423 7.08159  -2 
  10   0   2 80.9423 7.08159   1 
 -11   2   2 42.1931 3.64744  -2 
  11   0   2 42.1931 3.64744   1 
 -12   2   2 8.39796 3.72124  -2 
  12   0   2 8.39796 3.72124   1 
 -13   2   2 283.855 10.2325  -2 
  13   0   2 283.855 10.2325   1 
  13   1   2 17.4617 4.14072  -2 
 -13   1   2 17.4617 4.14072   1 
  12   1   2 181.963 9.47643  -2 
 -12   1   2 181.963 9.47643   1 
  11   1   2 70.7002 5.36461  -2 
 -11   1   2 70.7002 5.36461   1 
  10   1   2 56.7641 3.71757  -2 
 -10   1   2 56.7641 3.71757   1 
   9   1   2 263.104 5.58070  -2 
  -9   1   2 263.104 5.58070   1 
   8   1   2 182.070 3.36067  -2 
  -8   1   2 182.070 3.36067   1 
   7   1   2 433.281 5.84429  -2 
  -7   1   2 433.281 5.84429   1 
  -6   1   2 102.586 1.75004   2 
  -6   1   2 102.094 2.07575   1 
   6   1   2 614.432 12.3053  -2 
  -6   1   2 614.432 12.3053   1 
  -5   1   2 803.845 8.85446   2 
  -5   1   2 786.737 9.99814   1 
  -4   1   2 14.8041 0.57237   1 
  -4   1   2 12.9873 0.54238   2 
  -3   1   2 84.4881 1.25843   2 
  -3   1   2 84.8626 1.29934   1 
  -2   1   2 774.917 9.53541   1 
  -2   1   2 773.329 10.0909   2 
  -1   1   2 2348.33 31.3737   2 
  -1   1   2 2307.08 28.9412   1 
   1   1   2 3031.78 36.0350   2 
   1   1   2 3042.35 40.6114   1 
   2   1   2 725.861 9.01103   1 
   2   1   2 729.600 9.51240   2 
   3   1   2 0.62191 0.24181   2 
   3   1   2 0.23585 0.23623   1 
   4   1   2 1.04690 0.34847   1 
   4   1   2 0.78313 0.30761   2 
   5   1   2 632.676 7.05381   1 
   5   1   2 632.899 7.45345   2 
   6   1   2 521.572 6.61088   1 
  -6   1   2 623.583 15.8202  -2 
   6   1   2 623.583 15.8202   1 
   6   1   2 511.758 8.27151   2 
  -7   1   2 426.781 5.54124  -2 
   7   1   2 426.781 5.54124   1 
  -8   1   2 170.249 2.92822  -2 
   8   1   2 170.249 2.92822   1 
  -9   1   2 260.459 6.72987  -2 
   9   1   2 260.459 6.72987   1 
 -10   1   2 71.9892 6.72370  -2 
  10   1   2 71.9892 6.72370   1 
 -12   1   2 187.721 10.4843  -2 
  12   1   2 187.721 10.4843   1 
 -13   1   2 18.8552 5.36842  -2 
  13   1   2 18.8552 5.36842   1 
  13   0   2 255.877 12.3249  -2 
 -13   2   2 255.877 12.3249   1 
  12   0   2 7.34498 3.56257  -2 
 -12   2   2 7.34498 3.56257   1 
  11   0   2 32.2265 4.20507  -2 
 -11   2   2 32.2265 4.20507   1 
  10   0   2 73.2012 5.23853  -2 
 -10   2   2 73.2012 5.23853   1 
   9   0   2 27.1432 2.09321  -2 
  -9   2   2 27.1432 2.09321   1 
   8   0   2 241.338 4.35459  -2 
  -8   2   2 241.338 4.35459   1 
   7   0   2 1686.80 19.7780  -2 
  -7   2   2 1686.80 19.7780   1 
  -6   2   2 113.117 2.70447   1 
  -6   2   2 114.818 2.20956   2 
   6   0   2 280.780 4.95083  -2 
  -6   2   2 280.780 4.95083   1 
  -5   2   2 11.6659 0.56167   2 
  -5   2   2 13.4672 0.56311   1 
  -4   2   2 47.7250 0.89537   2 
  -4   2   2 49.0438 0.93827   1 
  -3   2   2 0.56605 0.23713   1 
  -3   2   2 0.86601 0.25096   2 
  -2   2   2 453.028 5.95201   1 
  -2   2   2 461.616 6.11683   2 
  -1   2   2 687.983 8.72266   1 
  -1   2   2 697.416 10.0211   2 
   0   2   2 1170.90 15.2419   2 
   0   0   2 4030.96 159.279  -2 
   0   2   2 4030.96 159.279   1 
   0   2   2 1197.04 16.3734   1 
   1   2   2 424.067 5.41088   2 
   1   2   2 424.558 5.42796   1 
   2   2   2 539.638 6.69735   2 
   2   2   2 542.683 6.75137   1 
   3   2   2 234.759 3.30437   1 
   3   2   2 232.839 3.26062   2 
   4   2   2 587.316 7.54745   1 
   4   2   2 579.188 7.42829   2 
   5   2   2 27.3492 0.80260   2 
   5   2   2 30.2414 0.79125   1 
  -5   0   2 28.4213 2.58813  -2 
   5   2   2 28.4213 2.58813   1 
   6   2   2 45.2635 1.29567   1 
   6   2   2 45.5877 1.41185   2 
  -6   0   2 721.347 17.2673  -2 
   6   2   2 721.347 17.2673   1 
  -7   0   2 508.600 6.78178  -2 
   7   2   2 508.600 6.78178   1 
   7   2   2 266.718 7.90834   2 
  -8   0   2 792.420 10.2170  -2 
   8   2   2 792.420 10.2170   1 
  -9   0   2 167.028 4.80927  -2 
   9   2   2 167.028 4.80927   1 
 -10   0   2 74.3947 3.73005  -2 
  10   2   2 74.3947 3.73005   1 
 -12   0   2 90.3019 5.44614  -2 
  12   2   2 90.3019 5.44614   1 
 -13   0   2 186.987 8.08388  -2 
  13   2   2 186.987 8.08388   1 
  13  -1   2 24.9619 4.26286  -2 
 -13   3   2 24.9619 4.26286   1 
  12  -1   2 20.8229 4.13553  -2 
 -12   3   2 20.8229 4.13553   1 
  11  -1   2 68.2076 5.16560  -2 
 -11   3   2 68.2076 5.16560   1 
  10  -1   2 27.6423 3.80502  -2 
 -10   3   2 27.6423 3.80502   1 
   9  -1   2 264.224 7.73690  -2 
  -9   3   2 264.224 7.73690   1 
   8  -1   2 540.292 9.07140  -2 
  -8   3   2 540.292 9.07140   1 
   7  -1   2 67.2747 1.59782  -2 
  -7   3   2 67.2747 1.59782   1 
  -6   3   2 58.8626 2.02531   1 
  -6   3   2 58.6784 1.52344   2 
   6  -1   2 217.873 3.80056  -2 
  -6   3   2 217.873 3.80056   1 
  -5   3   2 62.2987 1.05395   2 
  -5   3   2 61.7143 1.17369   1 
   5  -1   2 261.602 11.5743  -2 
  -5   3   2 261.602 11.5743   1 
  -4   3   2 66.2231 1.10727   2 
  -4   3   2 66.3407 1.15539   1 
  -3   3   2 930.422 11.0545   1 
  -3   3   2 939.921 11.1777   2 
  -2   3   2 76.9856 1.16834   2 
  -2   3   2 75.6136 1.13667   1 
  -1   3   2 255.540 3.22941   1 
  -1   3   2 253.264 3.39927   2 
   0   3   2 92.4851 1.35520   1 
   0   3   2 89.8479 1.37080   2 
   1   3   2 377.131 4.60672   1 
   1   3   2 379.892 5.25370   2 
   2   3   2 31.2412 0.60272   2 
   2   3   2 31.7349 0.59479   1 
   3   3   2 129.524 1.76162   2 
   3   3   2 130.645 1.80293   1 
   4   3   2 1020.67 12.8180   2 
   4   3   2 1027.81 12.9218   1 
   5   3   2 72.1722 1.27070   1 
   5   3   2 69.1409 1.31213   2 
  -5  -1   2 456.312 19.0251  -2 
   5   3   2 456.312 19.0251   1 
   6   3   2 18.4636 0.82354   2 
   6   3   2 18.9526 0.70998   1 
   7   3   2 146.118 4.54750   1 
  -7  -1   2 419.202 6.70434  -2 
   7   3   2 419.202 6.70434   1 
  -8  -1   2 79.5955 2.10236  -2 
   8   3   2 79.5955 2.10236   1 
  -9  -1   2 9.37057 1.66056  -2 
   9   3   2 9.37057 1.66056   1 
 -10  -1   2 107.888 4.11339  -2 
  10   3   2 107.888 4.11339   1 
 -11  -1   2 170.319 9.36770  -2 
  11   3   2 170.319 9.36770   1 
 -12  -1   2 109.752 5.89126  -2 
  12   3   2 109.752 5.89126   1 
 -13  -1   2 172.409 8.61096  -2 
  13   3   2 172.409 8.61096   1 
  12  -2   2 62.6684 5.18542  -2 
 -12   4   2 62.6684 5.18542   1 
  11  -2   2 147.040 8.17937  -2 
 -11   4   2 147.040 8.17937   1 
  10  -2   2 70.6111 5.15323  -2 
 -10   4   2 70.6111 5.15323   1 
   9  -2   2 31.6248 3.66979  -2 
  -9   4   2 31.6248 3.66979   1 
   8  -2   2 30.5728 1.88587  -2 
  -8   4   2 30.5728 1.88587   1 
   7  -2   2 945.740 11.9082  -2 
  -7   4   2 945.740 11.9082   1 
  -6   4   2 44.1841 2.85864   1 
   6  -2   2 102.335 1.94075  -2 
  -6   4   2 102.335 1.94075   1 
  -5   4   2 93.0546 1.60526   2 
  -5   4   2 93.0288 1.59634   1 
   5  -2   2 247.021 9.21413  -2 
  -5   4   2 247.021 9.21413   1 
  -4   4   2 407.529 4.90865   1 
  -4   4   2 408.853 4.74234   2 
  -3   4   2 72.7841 1.16444   1 
  -3   4   2 74.7484 1.20196   2 
  -2   4   2 291.493 3.50979   2 
  -2   4   2 289.870 3.94621   1 
   2  -2   2 1368.25 54.6669  -2 
  -2   4   2 1368.25 54.6669   1 
  -1   4   2 25.6281 0.56723   1 
   1  -2   2 29.1622 1.59536  -2 
  -1   4   2 29.1622 1.59536   1 
  -1   4   2 25.7792 0.58183   2 
   0   4   2 17.4288 0.45596   1 
   0   4   2 16.8961 0.41447   2 
   0  -2   2 33.8421 1.53766  -2 
   0   4   2 33.8421 1.53766   1 
   1   4   2 1.39316 0.20778   1 
   1   4   2 2.06882 0.22244   2 
   2   4   2 271.735 3.34136   1 
   2   4   2 272.965 3.51933   2 
   3   4   2 635.377 7.29776   1 
   3   4   2 640.670 7.63548   2 
   4   4   2 204.003 2.74939   1 
   4   4   2 203.920 2.60879   2 
   5   4   2 94.4665 1.45501   1 
   5   4   2 92.0498 1.50810   2 
  -6  -2   2 -0.9071 1.56913  -2 
   6   4   2 -0.9071 1.56913   1 
   6   4   2 0.22750 0.44631   2 
   6   4   2 0.24905 0.44838   1 
  -7  -2   2 177.773 3.42538  -2 
   7   4   2 177.773 3.42538   1 
   7   4   2 63.6966 2.55799   1 
   7   4   2 67.7761 4.23033   2 
  -8  -2   2 194.938 3.36100  -2 
   8   4   2 194.938 3.36100   1 
  -9  -2   2 66.3564 2.39474  -2 
   9   4   2 66.3564 2.39474   1 
 -10  -2   2 268.708 6.70337  -2 
  10   4   2 268.708 6.70337   1 
 -11  -2   2 42.7593 2.73564  -2 
  11   4   2 42.7593 2.73564   1 
 -12  -2   2 61.9903 3.25912  -2 
  12   4   2 61.9903 3.25912   1 
 -13  -2   2 29.9066 3.70770  -2 
  13   4   2 29.9066 3.70770   1 
  12  -3   2 4.52262 3.71873  -2 
 -12   5   2 4.52262 3.71873   1 
  11  -3   2 91.6366 6.14357  -2 
 -11   5   2 91.6366 6.14357   1 
  10  -3   2 0.20388 3.22212  -2 
 -10   5   2 0.20388 3.22212   1 
   9  -3   2 248.725 11.7229  -2 
  -9   5   2 248.725 11.7229   1 
   8  -3   2 388.611 12.5879  -2 
  -8   5   2 388.611 12.5879   1 
   7  -3   2 131.867 2.53295  -2 
  -7   5   2 131.867 2.53295   1 
   6  -3   2 129.628 2.25981  -2 
  -6   5   2 129.628 2.25981   1 
  -5   5   2 382.826 8.95691   1 
  -5   5   2 410.895 7.69928   2 
   5  -3   2 391.860 5.74214  -2 
  -5   5   2 391.860 5.74214   1 
  -4   5   2 16.8867 0.70412   1 
  -4   5   2 15.0906 0.62745   2 
   4  -3   2 34.7993 1.66055  -2 
  -4   5   2 34.7993 1.66055   1 
  -3   5   2 651.773 7.88629   1 
  -3   5   2 660.879 7.45269   2 
  -2   5   2 701.814 8.40298   2 
  -2   5   2 694.093 8.90126   1 
   2  -3   2 1412.13 46.2253  -2 
  -2   5   2 1412.13 46.2253   1 
   1  -3   2 673.969 17.1321  -2 
  -1   5   2 673.969 17.1321   1 
  -1   5   2 602.100 8.60051   1 
  -1   5   2 588.205 7.33799   2 
   0   5   2 48.4156 0.80403   1 
   0   5   2 47.2173 0.79025   2 
   1   5   2 181.213 2.40440   2 
   1   5   2 182.933 2.42904   1 
   2   5   2 501.250 5.99225   2 
   2   5   2 505.981 5.82489   1 
   3   5   2 33.7664 0.69108   1 
   3   5   2 34.5092 0.68702   2 
   4   5   2 219.483 2.79274   2 
   4   5   2 219.972 2.65230   1 
   5   5   2 69.6617 1.16930   2 
   5   5   2 70.5557 1.21301   1 
  -5  -3   2 151.483 7.05439  -2 
   5   5   2 151.483 7.05439   1 
   6   5   2 0.73200 0.37906   2 
   6   5   2 0.35599 0.42638   1 
  -6  -3   2 17.0325 1.62927  -2 
   6   5   2 17.0325 1.62927   1 
  -7  -3   2 44.8276 1.58058  -2 
   7   5   2 44.8276 1.58058   1 
   7   5   2 42.6221 2.82399   1 
   7   5   2 39.8857 1.81807   2 
  -8  -3   2 73.8596 1.93584  -2 
   8   5   2 73.8596 1.93584   1 
  -9  -3   2 55.6836 1.91505  -2 
   9   5   2 55.6836 1.91505   1 
 -10  -3   2 29.7108 2.20811  -2 
  10   5   2 29.7108 2.20811   1 
 -11  -3   2 47.0911 2.81194  -2 
  11   5   2 47.0911 2.81194   1 
 -12  -3   2 101.549 4.68778  -2 
  12   5   2 101.549 4.68778   1 
 -13  -3   2 130.314 6.62916  -2 
  13   5   2 130.314 6.62916   1 
 -12   6   2 55.4733 4.27551   1 
  11  -4   2 76.8143 5.76524  -2 
 -11   6   2 76.8143 5.76524   1 
  10  -4   2 95.6904 6.17292  -2 
 -10   6   2 95.6904 6.17292   1 
   9  -4   2 -3.0163 3.02023  -2 
  -9   6   2 -3.0163 3.02023   1 
   8  -4   2 413.031 13.2628  -2 
  -8   6   2 413.031 13.2628   1 
   7  -4   2 217.763 4.73970  -2 
  -7   6   2 217.763 4.73970   1 
   6  -4   2 1383.03 17.0553  -2 
  -6   6   2 1383.03 17.0553   1 
   5  -4   2 252.215 3.60860  -2 
  -5   6   2 252.215 3.60860   1 
  -5   6   2 225.070 10.7953   2 
  -5   6   2 198.243 7.76447   1 
  -4   6   2 108.042 2.43729   1 
  -4   6   2 109.192 2.60498   2 
   4  -4   2 170.634 3.18499  -2 
  -4   6   2 170.634 3.18499   1 
  -3   6   2 202.451 2.86718   2 
  -3   6   2 198.288 2.81482   1 
   3  -4   2 415.637 11.9670  -2 
  -3   6   2 415.637 11.9670   1 
  -2   6   2 352.891 4.64181   2 
  -2   6   2 342.437 4.87752   1 
   2  -4   2 861.510 21.5076  -2 
  -2   6   2 861.510 21.5076   1 
   1  -4   2 304.682 6.49698  -2 
  -1   6   2 304.682 6.49698   1 
  -1   6   2 229.614 3.65880   2 
  -1   6   2 229.658 3.73972   1 
   0   6   2 590.989 7.59466   2 
   0  -4   2 1100.18 30.1105  -2 
   0   6   2 1100.18 30.1105   1 
   0   6   2 593.044 8.09200   1 
   1   6   2 179.483 2.32834   1 
   1   6   2 182.444 2.60253   2 
   2   6   2 21.3299 0.52620   1 
   2   6   2 22.5237 0.53410   2 
   3   6   2 156.345 2.05901   1 
   3   6   2 159.111 2.17426   2 
   4   6   2 20.4495 0.62213   1 
   4   6   2 21.3651 0.64793   2 
  -4  -4   2 192.597 6.07197  -2 
   4   6   2 192.597 6.07197   1 
   5   6   2 40.6030 0.84182   2 
   5   6   2 39.2254 0.84755   1 
  -5  -4   2 62.6474 2.94842  -2 
   5   6   2 62.6474 2.94842   1 
   6   6   2 86.4519 1.55852   1 
  -6  -4   2 88.2515 3.67875  -2 
   6   6   2 88.2515 3.67875   1 
   6   6   2 84.6871 1.74050   2 
   7   6   2 24.2356 2.10808   2 
   7   6   2 22.6649 1.68947   1 
  -7  -4   2 34.7535 1.53972  -2 
   7   6   2 34.7535 1.53972   1 
  -8  -4   2 10.3290 1.28405  -2 
   8   6   2 10.3290 1.28405   1 
  -9  -4   2 42.3531 1.84199  -2 
   9   6   2 42.3531 1.84199   1 
 -10  -4   2 4.94352 1.65207  -2 
  10   6   2 4.94352 1.65207   1 
 -11  -4   2 2.70229 2.17993  -2 
  11   6   2 2.70229 2.17993   1 
 -12  -4   2 10.1415 2.98126  -2 
  12   6   2 10.1415 2.98126   1 
 -13  -4   2 44.0869 3.38813  -2 
  13   6   2 44.0869 3.38813   1 
  12  -5   2 54.0386 5.23868  -2 
 -12   7   2 54.0386 5.23868   1 
 -11   7   2 1.59303 1.68067   1 
  10  -5   2 14.9864 3.77480  -2 
 -10   7   2 14.9864 3.77480   1 
   9  -5   2 176.171 9.12367  -2 
  -9   7   2 176.171 9.12367   1 
   8  -5   2 275.769 9.50768  -2 
  -8   7   2 275.769 9.50768   1 
   7  -5   2 585.438 14.8495  -2 
  -7   7   2 585.438 14.8495   1 
   6  -5   2 236.717 3.99745  -2 
  -6   7   2 236.717 3.99745   1 
   5  -5   2 424.887 5.42350  -2 
  -5   7   2 424.887 5.42350   1 
   4  -5   2 205.497 3.08488  -2 
  -4   7   2 205.497 3.08488   1 
  -4   7   2 65.1311 2.61682   1 
   3  -5   2 541.608 7.44616  -2 
  -3   7   2 541.608 7.44616   1 
  -3   7   2 255.988 6.41443   1 
  -3   7   2 257.965 5.00373   2 
   2  -5   2 1084.15 20.7913  -2 
  -2   7   2 1084.15 20.7913   1 
  -2   7   2 440.088 6.99866   1 
  -2   7   2 438.312 6.68292   2 
  -1   7   2 1637.94 22.9249   1 
   1  -5   2 1995.28 57.0622  -2 
  -1   7   2 1995.28 57.0622   1 
  -1   7   2 1633.04 23.8639   2 
   0   7   2 175.641 2.59059   2 
   0  -5   2 205.586 3.75670  -2 
   0   7   2 205.586 3.75670   1 
   0   7   2 179.270 3.27870   1 
   1   7   2 1.19875 0.31396   2 
   1   7   2 1.16949 0.31877   1 
  -1  -5   2 124.107 3.31932  -2 
   1   7   2 124.107 3.31932   1 
   2   7   2 617.734 9.86178   2 
   2   7   2 605.560 7.68510   1 
  -2  -5   2 1542.97 41.8409  -2 
   2   7   2 1542.97 41.8409   1 
   3   7   2 5.32187 0.37700   2 
   3   7   2 4.80801 0.38519   1 
  -3  -5   2 144.275 5.03574  -2 
   3   7   2 144.275 5.03574   1 
   4   7   2 205.480 2.62867   1 
   4   7   2 208.471 2.82052   2 
  -4  -5   2 443.702 13.4718  -2 
   4   7   2 443.702 13.4718   1 
   5   7   2 477.603 6.29761   1 
   5   7   2 487.483 6.25568   2 
  -5  -5   2 589.810 12.4013  -2 
   5   7   2 589.810 12.4013   1 
   6   7   2 19.0806 0.84449   1 
   6   7   2 18.3719 0.84338   2 
  -6  -5   2 80.2906 2.67406  -2 
   6   7   2 80.2906 2.67406   1 
   7   7   2 27.3161 1.42952   1 
  -7  -5   2 309.580 6.00275  -2 
   7   7   2 309.580 6.00275   1 
   7   7   2 25.3076 1.72297   2 
  -8  -5   2 59.2685 1.81909  -2 
   8   7   2 59.2685 1.81909   1 
   8   7   2 58.1197 4.48268   2 
  -9  -5   2 6.94694 1.45379  -2 
   9   7   2 6.94694 1.45379   1 
 -10  -5   2 -1.7968 1.72173  -2 
  10   7   2 -1.7968 1.72173   1 
 -11  -5   2 24.1617 2.29855  -2 
  11   7   2 24.1617 2.29855   1 
 -12  -5   2 198.851 5.72801  -2 
  12   7   2 198.851 5.72801   1 
  12   7   2 132.447 7.06134   2 
 -13  -5   2 93.6565 3.95354  -2 
  13   7   2 93.6565 3.95354   1 
  11  -6   2 108.086 7.06509  -2 
 -11   8   2 108.086 7.06509   1 
  10  -6   2 230.877 11.3333  -2 
 -10   8   2 230.877 11.3333   1 
   9  -6   2 51.0666 4.64567  -2 
  -9   8   2 51.0666 4.64567   1 
  -8   8   2 43.1520 3.46437   1 
  -7   8   2 1.71876 1.31239   1 
   6  -6   2 211.830 5.09539  -2 
  -6   8   2 211.830 5.09539   1 
  -6   8   2 132.350 6.62019   1 
   5  -6   2 40.6656 1.37477  -2 
  -5   8   2 40.6656 1.37477   1 
  -5   8   2 1.49349 1.08719   1 
   4  -6   2 913.257 10.6773  -2 
  -4   8   2 913.257 10.6773   1 
  -4   8   2 772.238 32.3018   2 
   3  -6   2 124.870 2.01067  -2 
  -3   8   2 124.870 2.01067   1 
  -3   8   2 30.2891 1.28950   2 
  -3   8   2 29.4968 2.32240   1 
   2  -6   2 509.070 8.36188  -2 
  -2   8   2 509.070 8.36188   1 
  -2   8   2 299.900 5.36782   1 
  -2   8   2 296.193 4.59963   2 
  -1   8   2 10.8915 0.57196   2 
   1  -6   2 348.895 6.09752  -2 
  -1   8   2 348.895 6.09752   1 
  -1   8   2 10.8974 0.78208   1 
   0  -6   2 1037.91 17.2536  -2 
   0   8   2 1037.91 17.2536   1 
   0   8   2 269.394 5.00086   2 
   0   8   2 276.863 4.51362   1 
  -1  -6   2 55.6440 2.45803  -2 
   1   8   2 55.6440 2.45803   1 
   1   8   2 52.9068 1.05105   1 
   1   8   2 53.8392 0.97988   2 
   2   8   2 495.385 5.76111   1 
   2   8   2 502.548 6.65769   2 
  -2  -6   2 695.481 32.8412  -2 
   2   8   2 695.481 32.8412   1 
   3   8   2 323.927 4.16632   1 
   3   8   2 326.696 4.16628   2 
  -3  -6   2 391.580 9.40330  -2 
   3   8   2 391.580 9.40330   1 
   4   8   2 176.749 2.34942   1 
   4   8   2 174.573 2.72797   2 
  -4  -6   2 458.571 13.6108  -2 
   4   8   2 458.571 13.6108   1 
   5   8   2 351.077 4.87954   2 
   5   8   2 355.574 5.17860   1 
  -5  -6   2 494.261 8.63091  -2 
   5   8   2 494.261 8.63091   1 
   6   8   2 418.317 9.00964   2 
   6   8   2 431.538 9.69886   1 
  -6  -6   2 1086.00 14.7206  -2 
   6   8   2 1086.00 14.7206   1 
   7   8   2 8.91639 1.29137   2 
   7   8   2 6.63833 1.37626   1 
  -7  -6   2 37.6601 1.53947  -2 
   7   8   2 37.6601 1.53947   1 
  -8  -6   2 25.3212 1.47447  -2 
   8   8   2 25.3212 1.47447   1 
   8   8   2 19.2688 3.48860   2 
   8   8   2 15.0666 3.33988   1 
  -9  -6   2 116.508 2.77625  -2 
   9   8   2 116.508 2.77625   1 
 -10  -6   2 46.3479 2.02244  -2 
  10   8   2 46.3479 2.02244   1 
 -11  -6   2 127.193 3.87315  -2 
  11   8   2 127.193 3.87315   1 
 -12  -6   2 119.947 4.27895  -2 
  12   8   2 119.947 4.27895   1 
  12   8   2 26.1632 3.00378   2 
 -13  -6   2 47.4773 2.84128  -2 
  13   8   2 47.4773 2.84128   1 
  11  -7   2 107.733 7.10140  -2 
 -11   9   2 107.733 7.10140   1 
  10  -7   2 62.6089 5.38485  -2 
 -10   9   2 62.6089 5.38485   1 
   9  -7   2 156.114 8.54619  -2 
  -9   9   2 156.114 8.54619   1 
   8  -7   2 235.975 11.4116  -2 
  -8   9   2 235.975 11.4116   1 
   7  -7   2 27.8267 3.78568  -2 
  -7   9   2 27.8267 3.78568   1 
   6  -7   2 27.7883 2.50088  -2 
  -6   9   2 27.7883 2.50088   1 
   5  -7   2 381.549 6.22291  -2 
  -5   9   2 381.549 6.22291   1 
   4  -7   2 175.476 2.64979  -2 
  -4   9   2 175.476 2.64979   1 
   3  -7   2 932.103 12.9157  -2 
  -3   9   2 932.103 12.9157   1 
  -3   9   2 588.817 12.9422   1 
  -2   9   2 295.159 5.72727   2 
   2  -7   2 1217.16 16.2394  -2 
  -2   9   2 1217.16 16.2394   1 
  -2   9   2 293.013 6.68953   1 
   1  -7   2 579.906 11.1583  -2 
  -1   9   2 579.906 11.1583   1 
  -1   9   2 259.441 3.90419   1 
  -1   9   2 257.032 4.29074   2 
   0  -7   2 303.720 5.37297  -2 
   0   9   2 303.720 5.37297   1 
   0   9   2 274.113 4.47322   1 
   0   9   2 269.053 4.86362   2 
  -1  -7   2 208.121 4.30841  -2 
   1   9   2 208.121 4.30841   1 
   1   9   2 158.350 2.92584   2 
   1   9   2 156.003 2.47540   1 
   2   9   2 104.004 1.63726   1 
   2   9   2 105.207 1.63003   2 
  -2  -7   2 115.720 3.07142  -2 
   2   9   2 115.720 3.07142   1 
   3   9   2 166.705 2.55530   2 
  -3  -7   2 401.345 8.60115  -2 
   3   9   2 401.345 8.60115   1 
   3   9   2 164.247 2.45173   1 
   4   9   2 913.044 12.7835   1 
   4   9   2 899.503 13.7478   2 
  -4  -7   2 1318.13 20.5475  -2 
   4   9   2 1318.13 20.5475   1 
   5   9   2 365.277 5.61371   2 
   5   9   2 367.780 5.24130   1 
  -5  -7   2 686.800 14.2784  -2 
   5   9   2 686.800 14.2784   1 
   6   9   2 42.4536 1.53458   1 
   6   9   2 43.1183 1.46041   2 
  -6  -7   2 278.647 5.02546  -2 
   6   9   2 278.647 5.02546   1 
  -7  -7   2 378.857 5.18441  -2 
   7   9   2 378.857 5.18441   1 
   7   9   2 47.2053 5.10839   1 
  -8  -7   2 27.1060 1.41785  -2 
   8   9   2 27.1060 1.41785   1 
  -9  -7   2 161.470 3.37841  -2 
   9   9   2 161.470 3.37841   1 
 -10  -7   2 179.234 3.97115  -2 
  10   9   2 179.234 3.97115   1 
 -11  -7   2 140.216 3.79400  -2 
  11   9   2 140.216 3.79400   1 
 -12  -7   2 83.6782 3.38250  -2 
  12   9   2 83.6782 3.38250   1 
 -13  -7   2 202.718 5.50046  -2 
  13   9   2 202.718 5.50046   1 
  10  -8   2 259.012 12.6328  -2 
 -10  10   2 259.012 12.6328   1 
   9  -8   2 73.3096 5.74050  -2 
  -9  10   2 73.3096 5.74050   1 
   8  -8   2 27.0150 4.10494  -2 
  -8  10   2 27.0150 4.10494   1 
   7  -8   2 5.70867 3.37870  -2 
  -7  10   2 5.70867 3.37870   1 
   6  -8   2 11.5260 2.64811  -2 
  -6  10   2 11.5260 2.64811   1 
   5  -8   2 119.468 3.41235  -2 
  -5  10   2 119.468 3.41235   1 
   4  -8   2 1276.34 16.5602  -2 
  -4  10   2 1276.34 16.5602   1 
  -4  10   2 848.643 34.8288   1 
   3  -8   2 247.568 3.74433  -2 
  -3  10   2 247.568 3.74433   1 
  -3  10   2 106.975 3.38681   2 
  -3  10   2 96.4572 3.97236   1 
  -2  10   2 3.92438 0.78263   2 
   2  -8   2 110.025 1.97652  -2 
  -2  10   2 110.025 1.97652   1 
  -2  10   2 4.48331 1.26434   1 
  -1  10   2 19.9671 1.03050   1 
  -1  10   2 22.3900 1.37811   2 
   1  -8   2 89.4102 1.95729  -2 
  -1  10   2 89.4102 1.95729   1 
   0  -8   2 147.015 2.31115  -2 
   0  10   2 147.015 2.31115   1 
   0  10   2 62.2221 1.63456   2 
   0  10   2 64.8397 2.28142   1 
   1  10   2 67.5800 1.51694   2 
  -1  -8   2 76.9001 1.88470  -2 
   1  10   2 76.9001 1.88470   1 
   1  10   2 71.6022 1.51888   1 
   2  10   2 591.446 7.16499   1 
   2  10   2 593.337 8.11191   2 
  -2  -8   2 1009.47 24.6196  -2 
   2  10   2 1009.47 24.6196   1 
  -3  -8   2 985.841 17.1615  -2 
   3  10   2 985.841 17.1615   1 
   3  10   2 338.536 4.76936   1 
   3  10   2 354.636 7.45033   2 
   4  10   2 15.3753 0.91902   2 
  -4  -8   2 54.3417 1.67824  -2 
   4  10   2 54.3417 1.67824   1 
   4  10   2 17.2016 0.92783   1 
   5  10   2 8.47795 0.77470   1 
   5  10   2 10.6174 0.80087   2 
  -5  -8   2 68.9784 2.17201  -2 
   5  10   2 68.9784 2.17201   1 
   6  10   2 150.051 2.80933   2 
  -6  -8   2 427.949 7.28015  -2 
   6  10   2 427.949 7.28015   1 
   6  10   2 150.659 3.62175   1 
  -7  -8   2 157.135 2.95962  -2 
   7  10   2 157.135 2.95962   1 
   7  10   2 28.8323 1.61943   2 
   7  10   2 23.2973 2.31290   1 
  -8  -8   2 184.701 3.20479  -2 
   8  10   2 184.701 3.20479   1 
  -9  -8   2 397.862 6.61829  -2 
   9  10   2 397.862 6.61829   1 
 -10  -8   2 135.885 3.58005  -2 
  10  10   2 135.885 3.58005   1 
 -11  -8   2 17.1981 2.07607  -2 
  11  10   2 17.1981 2.07607   1 
 -12  -8   2 178.435 4.88547  -2 
  12  10   2 178.435 4.88547   1 
 -13  -8   2 86.9191 4.25858  -2 
  13  10   2 86.9191 4.25858   1 
  13  10   2 14.9797 2.63406   2 
  10  -9   2 23.1395 4.45274  -2 
 -10  11   2 23.1395 4.45274   1 
   9  -9   2 90.6446 6.41021  -2 
  -9  11   2 90.6446 6.41021   1 
   6  -9   2 57.4180 3.74011  -2 
  -6  11   2 57.4180 3.74011   1 
   5  -9   2 303.838 10.4271  -2 
  -5  11   2 303.838 10.4271   1 
  -5  11   2 141.100 7.10914   1 
   4  -9   2 38.4934 1.57272  -2 
  -4  11   2 38.4934 1.57272   1 
  -4  11   2 31.7585 3.42586   1 
  -3  11   2 18.8619 2.66552   2 
  -3  11   2 19.9844 2.99896   1 
   3  -9   2 38.7422 1.32889  -2 
  -3  11   2 38.7422 1.32889   1 
   2  -9   2 407.059 5.98803  -2 
  -2  11   2 407.059 5.98803   1 
  -2  11   2 312.200 10.0993   1 
  -2  11   2 311.369 6.29656   2 
  -1  11   2 2.53006 0.68431   2 
  -1  11   2 2.61152 1.28163   1 
   1  -9   2 26.2066 1.08288  -2 
  -1  11   2 26.2066 1.08288   1 
   0  -9   2 13.6633 1.03835  -2 
   0  11   2 13.6633 1.03835   1 
   0  11   2 3.93926 0.71207   2 
   0  11   2 4.05603 0.97280   1 
  -1  -9   2 321.745 5.33593  -2 
   1  11   2 321.745 5.33593   1 
   1  11   2 186.546 4.69713   2 
   1  11   2 194.978 4.09237   1 
  -2  -9   2 351.365 6.97457  -2 
   2  11   2 351.365 6.97457   1 
   2  11   2 201.249 3.33466   2 
   2  11   2 202.055 3.52708   1 
  -3  -9   2 143.941 3.02280  -2 
   3  11   2 143.941 3.02280   1 
   3  11   2 23.3911 1.06042   1 
   3  11   2 22.5841 1.43603   2 
   4  11   2 51.7180 1.35332   2 
   4  11   2 52.6152 1.37811   1 
  -4  -9   2 62.3029 2.21750  -2 
   4  11   2 62.3029 2.21750   1 
   5  11   2 1.96612 0.57711   1 
   5  11   2 0.73762 0.66971   2 
  -5  -9   2 6.20261 1.44707  -2 
   5  11   2 6.20261 1.44707   1 
   6  11   2 46.5822 1.82279   2 
  -6  -9   2 158.922 3.37639  -2 
   6  11   2 158.922 3.37639   1 
   6  11   2 44.1946 1.78855   1 
  -7  -9   2 8.94878 1.38366  -2 
   7  11   2 8.94878 1.38366   1 
   7  11   2 0.07844 0.92531   1 
   7  11   2 1.10183 0.94000   2 
   8  11   2 6.60899 1.89379   1 
  -8  -9   2 48.6731 1.87676  -2 
   8  11   2 48.6731 1.87676   1 
  -9  -9   2 200.973 3.98736  -2 
   9  11   2 200.973 3.98736   1 
   9  11   2 9.75514 2.78416   1 
  10  11   2 53.7092 4.38108   1 
 -10  -9   2 60.7913 2.85116  -2 
  10  11   2 60.7913 2.85116   1 
 -11  -9   2 28.8901 2.23298  -2 
  11  11   2 28.8901 2.23298   1 
 -12  -9   2 62.0191 2.83788  -2 
  12  11   2 62.0191 2.83788   1 
  13  11   2 7.30144 2.09091   2 
 -13  -9   2 41.1415 3.33580  -2 
  13  11   2 41.1415 3.33580   1 
  10 -10   2 109.887 7.35822  -2 
 -10  12   2 109.887 7.35822   1 
   7 -10   2 45.6658 6.69854  -2 
  -7  12   2 45.6658 6.69854   1 
   6 -10   2 28.7239 3.22085  -2 
  -6  12   2 28.7239 3.22085   1 
   5 -10   2 5.94445 1.85909  -2 
  -5  12   2 5.94445 1.85909   1 
   4 -10   2 136.130 3.54148  -2 
  -4  12   2 136.130 3.54148   1 
  -4  12   2 70.7486 4.64370   2 
   3 -10   2 374.048 5.73917  -2 
  -3  12   2 374.048 5.73917   1 
  -3  12   2 345.053 15.0347   1 
   2 -10   2 76.7025 1.83260  -2 
  -2  12   2 76.7025 1.83260   1 
  -2  12   2 28.2466 2.54369   1 
  -2  12   2 34.0837 2.28169   2 
  -1  12   2 6.85941 1.40087   2 
  -1  12   2 5.39732 1.34163   1 
   1 -10   2 25.7412 1.23207  -2 
  -1  12   2 25.7412 1.23207   1 
   0  12   2 31.3354 2.07718   2 
   0 -10   2 124.221 2.38622  -2 
   0  12   2 124.221 2.38622   1 
   0  12   2 33.1636 2.13217   1 
  -1 -10   2 168.338 3.04200  -2 
   1  12   2 168.338 3.04200   1 
   1  12   2 146.660 3.94971   1 
   1  12   2 142.727 4.55163   2 
   2  12   2 190.511 4.16987   1 
   2  12   2 190.843 4.69035   2 
  -2 -10   2 519.046 8.49269  -2 
   2  12   2 519.046 8.49269   1 
   3  12   2 218.830 4.20019   1 
   3  12   2 216.756 4.61168   2 
  -3 -10   2 358.667 6.18211  -2 
   3  12   2 358.667 6.18211   1 
   4  12   2 14.9063 0.81063   2 
  -4 -10   2 23.3615 1.55163  -2 
   4  12   2 23.3615 1.55163   1 
   4  12   2 13.0650 0.95078   1 
   5  12   2 81.3834 2.65945   1 
   5  12   2 80.0528 2.26751   2 
  -5 -10   2 135.904 2.82320  -2 
   5  12   2 135.904 2.82320   1 
   6  12   2 0.90301 0.73271   1 
   6  12   2 2.65468 0.90220   2 
  -6 -10   2 27.7009 1.82429  -2 
   6  12   2 27.7009 1.82429   1 
   7  12   2 61.6983 2.52715   1 
  -7 -10   2 98.2402 2.76101  -2 
   7  12   2 98.2402 2.76101   1 
   7  12   2 61.2892 2.50706   2 
  -8 -10   2 123.846 2.72028  -2 
   8  12   2 123.846 2.72028   1 
   8  12   2 4.44684 2.41330   1 
   8  12   2 3.32260 1.40581   2 
  -9 -10   2 256.455 4.98410  -2 
   9  12   2 256.455 4.98410   1 
   9  12   2 112.669 7.98012   2 
   9  12   2 109.207 7.24403   1 
 -10 -10   2 30.8242 2.12925  -2 
  10  12   2 30.8242 2.12925   1 
 -11 -10   2 15.7170 2.09963  -2 
  11  12   2 15.7170 2.09963   1 
  11  12   2 0.62966 1.47184   2 
 -12 -10   2 -1.9603 2.59575  -2 
  12  12   2 -1.9603 2.59575   1 
  12  12   2 -1.7386 1.43893   2 
   8 -11   2 43.9343 5.22221  -2 
  -8  13   2 43.9343 5.22221   1 
   7 -11   2 27.6089 3.65970  -2 
  -7  13   2 27.6089 3.65970   1 
  -7  13   2 24.0081 3.45431   2 
   6 -11   2 106.392 4.40618  -2 
  -6  13   2 106.392 4.40618   1 
  -6  13   2 20.9298 3.12949   2 
   5 -11   2 160.231 5.36935  -2 
  -5  13   2 160.231 5.36935   1 
  -5  13   2 31.6047 3.33220   2 
   4 -11   2 59.7781 2.48703  -2 
  -4  13   2 59.7781 2.48703   1 
   3 -11   2 62.2310 2.11474  -2 
  -3  13   2 62.2310 2.11474   1 
  -3  13   2 25.9904 2.71673   1 
   2 -11   2 259.822 4.00139  -2 
  -2  13   2 259.822 4.00139   1 
   1 -11   2 216.855 3.48233  -2 
  -1  13   2 216.855 3.48233   1 
   0 -11   2 12.5046 1.05609  -2 
   0  13   2 12.5046 1.05609   1 
   0  13   2 -0.4691 1.02898   2 
   1  13   2 96.2222 3.39894   2 
  -1 -11   2 160.866 2.88817  -2 
   1  13   2 160.866 2.88817   1 
   1  13   2 94.2021 4.03405   1 
  -2 -11   2 142.290 2.79296  -2 
   2  13   2 142.290 2.79296   1 
   2  13   2 87.8060 3.84098   2 
   2  13   2 89.8270 3.27830   1 
   3  13   2 11.9412 0.93936   2 
   3  13   2 10.2783 1.15930   1 
  -3 -11   2 57.5674 1.74084  -2 
   3  13   2 57.5674 1.74084   1 
   4  13   2 82.4786 2.02874   2 
  -4 -11   2 95.5145 2.70772  -2 
   4  13   2 95.5145 2.70772   1 
   4  13   2 85.7941 2.21912   1 
  -5 -11   2 210.844 4.42015  -2 
   5  13   2 210.844 4.42015   1 
   5  13   2 190.705 4.33798   1 
   5  13   2 195.704 5.65301   2 
   6  13   2 0.02440 0.62355   1 
   6  13   2 -0.2071 1.35463   2 
  -6 -11   2 6.84070 2.26412  -2 
   6  13   2 6.84070 2.26412   1 
   7  13   2 6.23910 1.55114   1 
  -7 -11   2 17.2436 1.59127  -2 
   7  13   2 17.2436 1.59127   1 
   7  13   2 6.84721 2.36825   2 
  -8 -11   2 71.9920 2.05185  -2 
   8  13   2 71.9920 2.05185   1 
   8  13   2 12.9074 1.85033   2 
  -9 -11   2 8.98230 1.59987  -2 
   9  13   2 8.98230 1.59987   1 
   9  13   2 5.47777 2.02992   2 
 -10 -11   2 8.26372 1.81504  -2 
  10  13   2 8.26372 1.81504   1 
 -11 -11   2 40.0636 2.45630  -2 
  11  13   2 40.0636 2.45630   1 
  11  13   2 39.6140 3.43840   2 
 -12 -11   2 7.60813 2.71306  -2 
  12  13   2 7.60813 2.71306   1 
   8 -12   2 42.0107 5.21577  -2 
  -8  14   2 42.0107 5.21577   1 
   7 -12   2 52.0964 5.46540  -2 
  -7  14   2 52.0964 5.46540   1 
   6 -12   2 129.703 7.78488  -2 
  -6  14   2 129.703 7.78488   1 
   5 -12   2 25.4963 2.81532  -2 
  -5  14   2 25.4963 2.81532   1 
   4 -12   2 203.264 4.17123  -2 
  -4  14   2 203.264 4.17123   1 
   3 -12   2 292.964 5.34719  -2 
  -3  14   2 292.964 5.34719   1 
   2 -12   2 295.557 4.95714  -2 
  -2  14   2 295.557 4.95714   1 
   1 -12   2 235.574 4.37939  -2 
  -1  14   2 235.574 4.37939   1 
  -1  14   2 13.6107 1.91672   2 
  -1  14   2 6.42897 2.26031   1 
   0  14   2 111.994 4.40381   2 
   0 -12   2 114.896 2.37260  -2 
   0  14   2 114.896 2.37260   1 
   1  14   2 0.81999 0.84670   1 
  -1 -12   2 1.69918 1.30164  -2 
   1  14   2 1.69918 1.30164   1 
   1  14   2 0.70380 1.34554   2 
  -2 -12   2 48.1707 1.70474  -2 
   2  14   2 48.1707 1.70474   1 
   2  14   2 39.4822 3.65095   2 
   2  14   2 38.7202 2.22050   1 
   3  14   2 402.770 7.95009   2 
  -3 -12   2 577.206 10.0630  -2 
   3  14   2 577.206 10.0630   1 
   3  14   2 406.184 8.05944   1 
  -4 -12   2 377.387 6.99084  -2 
   4  14   2 377.387 6.99084   1 
   4  14   2 291.553 6.11452   1 
   4  14   2 300.416 6.11718   2 
  -5 -12   2 8.51307 1.63058  -2 
   5  14   2 8.51307 1.63058   1 
   5  14   2 1.96489 1.48023   2 
   5  14   2 1.69185 0.84907   1 
  -6 -12   2 70.9143 2.66267  -2 
   6  14   2 70.9143 2.66267   1 
   6  14   2 37.8600 1.78700   1 
   6  14   2 35.6258 2.35384   2 
  -7 -12   2 137.015 3.73421  -2 
   7  14   2 137.015 3.73421   1 
   7  14   2 122.985 3.47357   1 
   7  14   2 118.211 3.63584   2 
  -8 -12   2 5.86434 1.59331  -2 
   8  14   2 5.86434 1.59331   1 
   8  14   2 4.37452 1.36507   2 
   8  14   2 2.58472 1.81975   1 
  -9 -12   2 146.410 3.29066  -2 
   9  14   2 146.410 3.29066   1 
   9  14   2 78.8885 3.62132   2 
 -10 -12   2 169.534 4.25313  -2 
  10  14   2 169.534 4.25313   1 
  10  14   2 121.030 8.30999   1 
 -11 -12   2 16.9893 2.14622  -2 
  11  14   2 16.9893 2.14622   1 
  11  14   2 7.56308 3.48362   2 
  12  14   2 2.90847 1.78610   2 
 -12 -12   2 17.0353 2.82818  -2 
  12  14   2 17.0353 2.82818   1 
   8 -13   2 124.755 7.77321  -2 
  -8  15   2 124.755 7.77321   1 
   7 -13   2 13.9209 4.30626  -2 
  -7  15   2 13.9209 4.30626   1 
   6 -13   2 42.3022 4.94645  -2 
  -6  15   2 42.3022 4.94645   1 
   5 -13   2 230.057 7.14445  -2 
  -5  15   2 230.057 7.14445   1 
   4 -13   2 32.0981 2.02044  -2 
  -4  15   2 32.0981 2.02044   1 
   3 -13   2 104.386 2.82238  -2 
  -3  15   2 104.386 2.82238   1 
   2 -13   2 296.901 5.84225  -2 
  -2  15   2 296.901 5.84225   1 
   1 -13   2 150.611 3.29913  -2 
  -1  15   2 150.611 3.29913   1 
  -1  15   2 116.704 6.80203   2 
   0  15   2 -0.4919 1.45473   1 
   0 -13   2 18.8402 1.47543  -2 
   0  15   2 18.8402 1.47543   1 
   0  15   2 -0.4260 1.21007   2 
  -1 -13   2 23.9021 1.74225  -2 
   1  15   2 23.9021 1.74225   1 
   1  15   2 23.4648 1.92366   1 
   1  15   2 23.2042 2.53852   2 
  -2 -13   2 296.618 5.72595  -2 
   2  15   2 296.618 5.72595   1 
   2  15   2 189.100 5.65943   1 
   2  15   2 184.115 6.82654   2 
  -3 -13   2 175.654 3.89196  -2 
   3  15   2 175.654 3.89196   1 
   3  15   2 125.885 3.30187   2 
   3  15   2 123.587 3.63858   1 
  -4 -13   2 265.531 5.24332  -2 
   4  15   2 265.531 5.24332   1 
   4  15   2 30.8167 1.91720   1 
   4  15   2 33.4573 1.64315   2 
   5  15   2 125.598 3.82809   1 
  -5 -13   2 184.426 4.07162  -2 
   5  15   2 184.426 4.07162   1 
   5  15   2 128.727 5.51848   2 
   6  15   2 0.20420 1.05201   2 
  -6 -13   2 -3.4630 1.65305  -2 
   6  15   2 -3.4630 1.65305   1 
   6  15   2 0.07672 0.88796   1 
  -7 -13   2 14.4838 2.00973  -2 
   7  15   2 14.4838 2.00973   1 
   7  15   2 7.48080 1.26980   2 
   7  15   2 6.03417 1.21494   1 
  -8 -13   2 41.2036 2.26716  -2 
   8  15   2 41.2036 2.26716   1 
   8  15   2 36.7463 2.79451   1 
   8  15   2 39.6717 2.38496   2 
  -9 -13   2 47.6062 2.12037  -2 
   9  15   2 47.6062 2.12037   1 
   9  15   2 24.5557 4.01969   2 
 -10 -13   2 36.7374 2.10244  -2 
  10  15   2 36.7374 2.10244   1 
  10  15   2 13.3035 3.71195   2 
 -11 -13   2 166.717 4.29479  -2 
  11  15   2 166.717 4.29479   1 
  11  15   2 51.7807 6.25906   1 
   7 -14   2 11.1298 4.55548  -2 
  -7  16   2 11.1298 4.55548   1 
   5 -14   2 51.5552 4.29507  -2 
  -5  16   2 51.5552 4.29507   1 
   4 -14   2 309.056 7.69527  -2 
  -4  16   2 309.056 7.69527   1 
   3 -14   2 55.5157 2.71148  -2 
  -3  16   2 55.5157 2.71148   1 
   2 -14   2 74.0692 2.88761  -2 
  -2  16   2 74.0692 2.88761   1 
  -2  16   2 31.3997 4.34223   1 
   1 -14   2 13.6145 1.66550  -2 
  -1  16   2 13.6145 1.66550   1 
  -1  16   2 -1.3234 1.55209   2 
   0 -14   2 12.3466 1.63029  -2 
   0  16   2 12.3466 1.63029   1 
   0  16   2 7.86120 2.26180   1 
  -1 -14   2 36.2656 2.10239  -2 
   1  16   2 36.2656 2.10239   1 
   1  16   2 -1.0355 0.95366   1 
   1  16   2 -0.2717 1.15725   2 
  -2 -14   2 163.953 3.74523  -2 
   2  16   2 163.953 3.74523   1 
   2  16   2 147.718 4.27132   1 
   2  16   2 162.757 9.42241   2 
  -3 -14   2 421.524 7.69194  -2 
   3  16   2 421.524 7.69194   1 
   3  16   2 78.9822 2.92957   1 
   3  16   2 80.9772 2.91730   2 
  -4 -14   2 216.246 4.21893  -2 
   4  16   2 216.246 4.21893   1 
   4  16   2 29.2888 2.20704   2 
   4  16   2 26.1574 2.24408   1 
  -5 -14   2 18.9340 1.62081  -2 
   5  16   2 18.9340 1.62081   1 
   5  16   2 15.3266 2.34896   1 
   5  16   2 17.9888 2.55065   2 
  -6 -14   2 2.71207 1.67297  -2 
   6  16   2 2.71207 1.67297   1 
   6  16   2 2.45128 1.15246   2 
   6  16   2 0.68529 1.04893   1 
   7  16   2 2.16706 1.05977   2 
   7  16   2 1.70814 1.06589   1 
  -7 -14   2 29.2693 2.48232  -2 
   7  16   2 29.2693 2.48232   1 
   8  16   2 33.4648 2.03910   2 
  -8 -14   2 39.6473 3.14739  -2 
   8  16   2 39.6473 3.14739   1 
   8  16   2 31.3906 1.86180   1 
  -9 -14   2 104.091 3.03931  -2 
   9  16   2 104.091 3.03931   1 
   9  16   2 85.1294 6.92362   1 
 -10 -14   2 184.233 3.99530  -2 
  10  16   2 184.233 3.99530   1 
 -11 -14   2 18.0266 2.38535  -2 
  11  16   2 18.0266 2.38535   1 
   6 -15   2 124.941 11.1208  -2 
  -6  17   2 124.941 11.1208   1 
   5 -15   2 207.205 9.14416  -2 
  -5  17   2 207.205 9.14416   1 
   4 -15   2 160.231 5.71211  -2 
  -4  17   2 160.231 5.71211   1 
   3 -15   2 40.3754 2.82830  -2 
  -3  17   2 40.3754 2.82830   1 
   2 -15   2 2.71744 2.07256  -2 
  -2  17   2 2.71744 2.07256   1 
  -1  17   2 45.7089 4.41151   2 
   1 -15   2 91.9261 2.75037  -2 
  -1  17   2 91.9261 2.75037   1 
   0 -15   2 170.369 3.47453  -2 
   0  17   2 170.369 3.47453   1 
  -1 -15   2 254.317 4.88615  -2 
   1  17   2 254.317 4.88615   1 
   1  17   2 204.820 11.2379   2 
   1  17   2 209.412 10.6892   1 
   2  17   2 32.4106 2.98658   2 
  -2 -15   2 163.269 3.80009  -2 
   2  17   2 163.269 3.80009   1 
   2  17   2 35.4796 2.43870   1 
   3  17   2 22.5245 1.79697   2 
   3  17   2 20.5507 2.49080   1 
  -3 -15   2 189.349 3.90422  -2 
   3  17   2 189.349 3.90422   1 
   4  17   2 3.54711 1.39405   1 
   4  17   2 2.89375 1.36789   2 
  -4 -15   2 4.45607 1.62827  -2 
   4  17   2 4.45607 1.62827   1 
   5  17   2 2.30439 1.32811   2 
  -5 -15   2 1.36468 1.67396  -2 
   5  17   2 1.36468 1.67396   1 
   5  17   2 0.82623 1.24945   1 
   6  17   2 3.52201 1.25035   2 
  -6 -15   2 32.0815 2.14987  -2 
   6  17   2 32.0815 2.14987   1 
   6  17   2 2.47829 1.28300   1 
  -7 -15   2 125.789 4.55020  -2 
   7  17   2 125.789 4.55020   1 
   7  17   2 108.393 3.38289   1 
   7  17   2 108.244 3.36100   2 
  -8 -15   2 107.492 4.10111  -2 
   8  17   2 107.492 4.10111   1 
   8  17   2 92.1292 3.69177   2 
   8  17   2 87.7926 3.29864   1 
   9  17   2 7.65397 3.49884   2 
  -9 -15   2 61.0594 2.63066  -2 
   9  17   2 61.0594 2.63066   1 
   9  17   2 10.2391 2.57213   1 
 -10 -15   2 5.63263 1.99954  -2 
  10  17   2 5.63263 1.99954   1 
   5 -16   2 186.695 8.71398  -2 
  -5  18   2 186.695 8.71398   1 
   4 -16   2 102.180 4.11084  -2 
  -4  18   2 102.180 4.11084   1 
   3 -16   2 38.0510 2.96647  -2 
  -3  18   2 38.0510 2.96647   1 
   2 -16   2 150.875 4.31064  -2 
  -2  18   2 150.875 4.31064   1 
   1 -16   2 115.186 3.33488  -2 
  -1  18   2 115.186 3.33488   1 
   0 -16   2 89.3196 2.67116  -2 
   0  18   2 89.3196 2.67116   1 
  -1 -16   2 4.51013 1.65637  -2 
   1  18   2 4.51013 1.65637   1 
  -2 -16   2 107.431 2.89117  -2 
   2  18   2 107.431 2.89117   1 
   2  18   2 92.3484 4.71278   2 
   2  18   2 81.9870 5.99258   1 
   3  18   2 4.41333 1.42693   1 
   3  18   2 4.70027 1.66478   2 
  -3 -16   2 24.2066 2.11290  -2 
   3  18   2 24.2066 2.11290   1 
  -4 -16   2 117.158 3.23203  -2 
   4  18   2 117.158 3.23203   1 
   4  18   2 1.41123 1.34121   2 
   4  18   2 0.64756 1.51624   1 
   5  18   2 3.42752 1.31344   2 
  -5 -16   2 107.612 3.10065  -2 
   5  18   2 107.612 3.10065   1 
   5  18   2 3.01620 1.78184   1 
  -6 -16   2 78.6442 2.72490  -2 
   6  18   2 78.6442 2.72490   1 
   6  18   2 31.5929 3.08504   1 
   6  18   2 40.9542 3.42183   2 
   7  18   2 0.90702 1.24801   1 
  -7 -16   2 9.48330 2.36573  -2 
   7  18   2 9.48330 2.36573   1 
   7  18   2 0.29377 1.47408   2 
  -8 -16   2 30.2145 2.54020  -2 
   8  18   2 30.2145 2.54020   1 
   8  18   2 1.16322 1.44036   1 
   8  18   2 8.72929 1.29739   2 
  -9 -16   2 5.41643 2.79979  -2 
   9  18   2 5.41643 2.79979   1 
   9  18   2 -0.5499 1.12928   2 
   9  18   2 0.72261 1.10714   1 
  10  18   2 2.18278 3.00059   1 
 -10 -16   2 23.0707 2.42032  -2 
  10  18   2 23.0707 2.42032   1 
   4 -17   2 126.159 3.85161  -2 
  -4  19   2 126.159 3.85161   1 
   3 -17   2 168.879 5.36374  -2 
  -3  19   2 168.879 5.36374   1 
   2 -17   2 -0.1486 2.87047  -2 
  -2  19   2 -0.1486 2.87047   1 
   1 -17   2 47.4818 2.33389  -2 
  -1  19   2 47.4818 2.33389   1 
   0 -17   2 35.6598 2.12142  -2 
   0  19   2 35.6598 2.12142   1 
  -1 -17   2 9.15049 1.78102  -2 
   1  19   2 9.15049 1.78102   1 
  -2 -17   2 23.6926 2.08126  -2 
   2  19   2 23.6926 2.08126   1 
   2  19   2 13.8943 2.48036   2 
   2  19   2 17.3916 2.58674   1 
  -3 -17   2 171.963 3.83496  -2 
   3  19   2 171.963 3.83496   1 
   3  19   2 6.27385 2.48498   2 
   3  19   2 3.36233 2.76208   1 
  -4 -17   2 10.1246 1.76224  -2 
   4  19   2 10.1246 1.76224   1 
   4  19   2 0.67470 2.49688   1 
   4  19   2 1.79942 1.77006   2 
   5  19   2 12.5968 2.52572   2 
   5  19   2 12.8770 2.47685   1 
  -5 -17   2 38.1312 2.24528  -2 
   5  19   2 38.1312 2.24528   1 
   6  19   2 13.9895 2.57497   1 
  -6 -17   2 55.1447 2.51864  -2 
   6  19   2 55.1447 2.51864   1 
   6  19   2 7.26212 2.27165   2 
  -7 -17   2 38.8656 2.73285  -2 
   7  19   2 38.8656 2.73285   1 
   7  19   2 11.6038 1.82568   1 
   7  19   2 12.4653 2.55660   2 
   8  19   2 9.03925 1.49548   1 
   8  19   2 10.3424 1.83014   2 
  -8 -17   2 11.3638 3.21855  -2 
   8  19   2 11.3638 3.21855   1 
   9  19   2 3.02683 1.75900   2 
   9  19   2 2.98544 1.45739   1 
  -9 -17   2 18.8720 3.04076  -2 
   9  19   2 18.8720 3.04076   1 
   3 -18   2 53.8081 3.38872  -2 
  -3  20   2 53.8081 3.38872   1 
   2 -18   2 19.3070 2.50041  -2 
  -2  20   2 19.3070 2.50041   1 
   1 -18   2 67.1538 2.85241  -2 
  -1  20   2 67.1538 2.85241   1 
   0 -18   2 24.8596 2.30130  -2 
   0  20   2 24.8596 2.30130   1 
  -1 -18   2 86.8852 2.70213  -2 
   1  20   2 86.8852 2.70213   1 
   2  20   2 2.15212 2.07704   2 
  -2 -18   2 2.13307 1.86228  -2 
   2  20   2 2.13307 1.86228   1 
   2  20   2 -1.2405 2.53774   1 
   3  20   2 8.83484 3.34838   1 
  -3 -18   2 26.2200 2.06588  -2 
   3  20   2 26.2200 2.06588   1 
  -4 -18   2 42.7976 2.14283  -2 
   4  20   2 42.7976 2.14283   1 
  -5 -18   2 43.7279 2.29995  -2 
   5  20   2 43.7279 2.29995   1 
   5  20   2 22.9689 4.29438   1 
   5  20   2 22.1022 2.44409   2 
   6  20   2 8.22096 1.99723   1 
  -6 -18   2 25.0536 2.64671  -2 
   6  20   2 25.0536 2.64671   1 
   6  20   2 11.1138 1.79207   2 
  -7 -18   2 27.1585 2.57830  -2 
   7  20   2 27.1585 2.57830   1 
   7  20   2 4.59498 1.88329   1 
   7  20   2 6.55018 1.56001   2 
   8  20   2 1.87017 1.84427   1 
  -8 -18   2 3.41388 2.45343  -2 
   8  20   2 3.41388 2.45343   1 
   8  20   2 3.27096 3.21818   2 
   1 -19   2 45.0132 2.90915  -2 
  -1  21   2 45.0132 2.90915   1 
   0 -19   2 40.6590 2.54412  -2 
   0  21   2 40.6590 2.54412   1 
  -1 -19   2 18.0126 2.16083  -2 
   1  21   2 18.0126 2.16083   1 
  -2 -19   2 21.8490 2.28535  -2 
   2  21   2 21.8490 2.28535   1 
   2  21   2 21.4740 3.18421   2 
   2  21   2 21.6796 4.77315   1 
   3  21   2 6.95951 1.84980   1 
  -3 -19   2 70.9059 3.39411  -2 
   3  21   2 70.9059 3.39411   1 
   3  21   2 8.34633 3.52278   2 
   4  21   2 7.37963 1.77304   1 
  -4 -19   2 81.6015 3.45457  -2 
   4  21   2 81.6015 3.45457   1 
   4  21   2 13.7722 2.15539   2 
   5  21   2 19.8432 2.36834   2 
   5  21   2 12.3892 3.77844   1 
  -5 -19   2 24.4912 2.25385  -2 
   5  21   2 24.4912 2.25385   1 
  -6 -19   2 2.39236 2.37809  -2 
   6  21   2 2.39236 2.37809   1 
   6  21   2 -1.3912 1.36250   1 
   6  21   2 1.61707 1.62797   2 
   2  22   2 29.0646 5.00699   2 
  -2 -20   2 42.5902 3.36448  -2 
   2  22   2 42.5902 3.36448   1 
   2  22   2 44.0520 5.90688   1 
  -3 -20   2 108.432 4.12078  -2 
   3  22   2 108.432 4.12078   1 
   3  22   2 5.65383 3.54708   2 
   3  22   2 5.21090 3.63431   1 
   6  21   3 66.2081 4.08691  -2 
  -6 -19   3 66.2081 4.08691   1 
   5  21   3 60.6095 3.45505  -2 
  -5 -19   3 60.6095 3.45505   1 
   4  21   3 63.2315 3.20632  -2 
  -4 -19   3 63.2315 3.20632   1 
   3  21   3 45.5979 2.93307  -2 
  -3 -19   3 45.5979 2.93307   1 
   2  21   3 34.9940 2.76098  -2 
  -2 -19   3 34.9940 2.76098   1 
   1  21   3 -0.5295 2.26940  -2 
  -1 -19   3 -0.5295 2.26940   1 
   0  21   3 7.25206 2.77744  -2 
   0 -19   3 7.25206 2.77744   1 
  -1  21   3 35.6479 3.71484  -2 
   1 -19   3 35.6479 3.71484   1 
   8  20   3 -0.3234 5.44926  -2 
  -8 -18   3 -0.3234 5.44926   1 
   7  20   3 148.221 5.31714  -2 
  -7 -18   3 148.221 5.31714   1 
   6  20   3 114.750 4.05786  -2 
  -6 -18   3 114.750 4.05786   1 
   5  20   3 164.874 5.00024  -2 
  -5 -18   3 164.874 5.00024   1 
   4  20   3 67.2394 3.21494  -2 
  -4 -18   3 67.2394 3.21494   1 
   3  20   3 42.7816 2.54185  -2 
  -3 -18   3 42.7816 2.54185   1 
   2  20   3 4.28448 1.99430  -2 
  -2 -18   3 4.28448 1.99430   1 
   1  20   3 1.61524 2.01617  -2 
  -1 -18   3 1.61524 2.01617   1 
   0  20   3 29.5026 2.66188  -2 
   0 -18   3 29.5026 2.66188   1 
  -1  20   3 150.481 5.47503  -2 
   1 -18   3 150.481 5.47503   1 
  -2  20   3 58.7176 3.69249  -2 
   2 -18   3 58.7176 3.69249   1 
  -3  20   3 120.287 5.96304  -2 
   3 -18   3 120.287 5.96304   1 
   9  19   3 15.0530 5.96158  -2 
  -9 -17   3 15.0530 5.96158   1 
   8  19   3 87.4277 3.59966  -2 
  -8 -17   3 87.4277 3.59966   1 
   7  19   3 81.4654 3.41104  -2 
  -7 -17   3 81.4654 3.41104   1 
   6  19   3 121.626 3.72479  -2 
  -6 -17   3 121.626 3.72479   1 
   5  19   3 160.356 4.35247  -2 
  -5 -17   3 160.356 4.35247   1 
   4  19   3 87.6992 2.94814  -2 
  -4 -17   3 87.6992 2.94814   1 
   3  19   3 29.3623 2.11192  -2 
  -3 -17   3 29.3623 2.11192   1 
   2  19   3 49.7342 2.36937  -2 
  -2 -17   3 49.7342 2.36937   1 
   1  19   3 34.1833 2.35042  -2 
  -1 -17   3 34.1833 2.35042   1 
   0  19   3 55.4603 3.01609  -2 
   0 -17   3 55.4603 3.01609   1 
  -1  19   3 110.775 4.54945  -2 
   1 -17   3 110.775 4.54945   1 
  -2  19   3 137.951 4.63523  -2 
   2 -17   3 137.951 4.63523   1 
  -3  19   3 22.6062 2.76584  -2 
   3 -17   3 22.6062 2.76584   1 
  -4  19   3 7.35611 3.43659  -2 
   4 -17   3 7.35611 3.43659   1 
  10  18   3 13.5069 6.27376  -2 
 -10 -16   3 13.5069 6.27376   1 
   9  18   3 61.4651 3.07899  -2 
  -9 -16   3 61.4651 3.07899   1 
   8  18   3 22.9963 2.34344  -2 
  -8 -16   3 22.9963 2.34344   1 
   7  18   3 92.5582 3.93500  -2 
  -7 -16   3 92.5582 3.93500   1 
  -7 -16   3 2.22900 1.94826   1 
   6  18   3 112.814 3.28118  -2 
  -6 -16   3 112.814 3.28118   1 
   5  18   3 93.4673 2.94173  -2 
  -5 -16   3 93.4673 2.94173   1 
   4  18   3 42.3357 2.01073  -2 
  -4 -16   3 42.3357 2.01073   1 
   3  18   3 110.662 2.91116  -2 
  -3 -16   3 110.662 2.91116   1 
   2  18   3 148.310 3.21014  -2 
  -2 -16   3 148.310 3.21014   1 
   1  18   3 54.7423 2.09957  -2 
  -1 -16   3 54.7423 2.09957   1 
   0  18   3 135.977 3.60717  -2 
   0 -16   3 135.977 3.60717   1 
  -1  18   3 216.493 5.33165  -2 
   1 -16   3 216.493 5.33165   1 
  -2  18   3 26.0326 2.58413  -2 
   2 -16   3 26.0326 2.58413   1 
  -3  18   3 14.7891 2.51133  -2 
   3 -16   3 14.7891 2.51133   1 
  -4  18   3 22.2670 3.05069  -2 
   4 -16   3 22.2670 3.05069   1 
  -5  18   3 20.8225 3.23367  -2 
   5 -16   3 20.8225 3.23367   1 
  10  17   3 31.2219 2.72155  -2 
 -10 -15   3 31.2219 2.72155   1 
   9  17   3 22.2155 2.32809  -2 
  -9 -15   3 22.2155 2.32809   1 
   8  17   3 86.5944 2.94658  -2 
  -8 -15   3 86.5944 2.94658   1 
   7  17   3 42.6635 2.41878  -2 
  -7 -15   3 42.6635 2.41878   1 
  -7 -15   3 45.4182 5.05652   1 
   6  17   3 21.4001 1.82651  -2 
  -6 -15   3 21.4001 1.82651   1 
   5  17   3 64.4112 2.08794  -2 
  -5 -15   3 64.4112 2.08794   1 
   4  17   3 90.0311 2.38751  -2 
  -4 -15   3 90.0311 2.38751   1 
   3  17   3 170.818 3.42731  -2 
  -3 -15   3 170.818 3.42731   1 
   2  17   3 181.295 3.57555  -2 
  -2 -15   3 181.295 3.57555   1 
   1  17   3 47.4126 2.02938  -2 
  -1 -15   3 47.4126 2.02938   1 
   0  17   3 105.518 3.04782  -2 
   0 -15   3 105.518 3.04782   1 
  -1  17   3 58.7317 2.24203  -2 
   1 -15   3 58.7317 2.24203   1 
  -2  17   3 39.1575 2.06197  -2 
   2 -15   3 39.1575 2.06197   1 
  -3  17   3 27.2832 2.14564  -2 
   3 -15   3 27.2832 2.14564   1 
  -4  17   3 43.4865 3.36399  -2 
   4 -15   3 43.4865 3.36399   1 
  -5  17   3 55.9783 3.36892  -2 
   5 -15   3 55.9783 3.36892   1 
  -6  17   3 109.671 5.84615  -2 
   6 -15   3 109.671 5.84615   1 
  11  16   3 -0.3639 5.72209  -2 
 -11 -14   3 -0.3639 5.72209   1 
  10  16   3 5.63878 2.04260  -2 
 -10 -14   3 5.63878 2.04260   1 
   9  16   3 19.5078 1.98746  -2 
  -9 -14   3 19.5078 1.98746   1 
   8  16   3 34.6303 2.13234  -2 
  -8 -14   3 34.6303 2.13234   1 
   7  16   3 -3.5194 1.66294  -2 
  -7 -14   3 -3.5194 1.66294   1 
  -7 -14   3 -0.4579 2.23271   1 
   6  16   3 67.1882 2.23261  -2 
  -6 -14   3 67.1882 2.23261   1 
  -6 -14   3 1.24010 2.24670   1 
   5  16   3 57.5469 1.96219  -2 
  -5 -14   3 57.5469 1.96219   1 
   4  16   3 32.9649 1.62906  -2 
  -4 -14   3 32.9649 1.62906   1 
   3  16   3 32.0984 1.58026  -2 
  -3 -14   3 32.0984 1.58026   1 
   2  16   3 68.6395 2.03974  -2 
  -2 -14   3 68.6395 2.03974   1 
   1  16   3 19.1447 1.65071  -2 
  -1 -14   3 19.1447 1.65071   1 
   0  16   3 51.9957 2.13224  -2 
   0 -14   3 51.9957 2.13224   1 
  -1  16   3 218.029 4.31143  -2 
   1 -14   3 218.029 4.31143   1 
  -2  16   3 79.4870 2.49244  -2 
   2 -14   3 79.4870 2.49244   1 
  -3  16   3 22.4246 1.88033  -2 
   3 -14   3 22.4246 1.88033   1 
  -4  16   3 6.40138 1.94112  -2 
   4 -14   3 6.40138 1.94112   1 
  -5  16   3 20.5936 2.58928  -2 
   5 -14   3 20.5936 2.58928   1 
  -6  16   3 11.6751 3.01597  -2 
   6 -14   3 11.6751 3.01597   1 
  -7  16   3 202.588 10.7634  -2 
   7 -14   3 202.588 10.7634   1 
  11  15   3 5.42347 2.34117  -2 
 -11 -13   3 5.42347 2.34117   1 
  10  15   3 63.3440 3.11530  -2 
 -10 -13   3 63.3440 3.11530   1 
   9  15   3 24.5296 2.01608  -2 
  -9 -13   3 24.5296 2.01608   1 
   8  15   3 37.0175 2.08353  -2 
  -8 -13   3 37.0175 2.08353   1 
   7  15   3 80.3340 2.34339  -2 
  -7 -13   3 80.3340 2.34339   1 
   6  15   3 119.575 2.91921  -2 
  -6 -13   3 119.575 2.91921   1 
  -6 -13   3 89.2306 6.57826   1 
   5  15   3 12.7460 1.37066  -2 
  -5 -13   3 12.7460 1.37066   1 
   4  15   3 237.253 4.01423  -2 
  -4 -13   3 237.253 4.01423   1 
   3  15   3 7.20435 1.22800  -2 
  -3 -13   3 7.20435 1.22800   1 
   2  15   3 230.501 3.89494  -2 
  -2 -13   3 230.501 3.89494   1 
   1  15   3 2.69521 1.34138  -2 
  -1 -13   3 2.69521 1.34138   1 
   0  15   3 75.3684 2.22055  -2 
   0 -13   3 75.3684 2.22055   1 
  -1  15   3 59.2270 2.04992  -2 
   1 -13   3 59.2270 2.04992   1 
  -2  15   3 159.455 3.46095  -2 
   2 -13   3 159.455 3.46095   1 
  -3  15   3 31.6218 1.88774  -2 
   3 -13   3 31.6218 1.88774   1 
  -4  15   3 44.9485 2.14769  -2 
   4 -13   3 44.9485 2.14769   1 
  -5  15   3 8.46896 1.98970  -2 
   5 -13   3 8.46896 1.98970   1 
  -6  15   3 85.7846 4.99323  -2 
   6 -13   3 85.7846 4.99323   1 
  -7  15   3 107.438 7.14564  -2 
   7 -13   3 107.438 7.14564   1 
  -8  15   3 38.2279 3.96019  -2 
   8 -13   3 38.2279 3.96019   1 
  12  14   3 23.0957 6.34375  -2 
 -12 -12   3 23.0957 6.34375   1 
  11  14   3 11.4328 2.38134  -2 
 -11 -12   3 11.4328 2.38134   1 
  10  14   3 60.4353 2.58593  -2 
 -10 -12   3 60.4353 2.58593   1 
   9  14   3 13.8066 1.80973  -2 
  -9 -12   3 13.8066 1.80973   1 
   8  14   3 89.1838 2.45384  -2 
  -8 -12   3 89.1838 2.45384   1 
   7  14   3 172.183 3.47034  -2 
  -7 -12   3 172.183 3.47034   1 
   6  14   3 102.363 2.49758  -2 
  -6 -12   3 102.363 2.49758   1 
  -6 -12   3 0.96050 1.81081   1 
   5  14   3 124.927 2.60021  -2 
  -5 -12   3 124.927 2.60021   1 
   4  14   3 75.1719 1.93792  -2 
  -4 -12   3 75.1719 1.93792   1 
   3  14   3 146.553 2.77148  -2 
  -3 -12   3 146.553 2.77148   1 
   2  14   3 97.7902 2.12599  -2 
  -2 -12   3 97.7902 2.12599   1 
   1  14   3 95.9247 2.39929  -2 
  -1 -12   3 95.9247 2.39929   1 
   0  14   3 83.8446 2.11164  -2 
   0 -12   3 83.8446 2.11164   1 
  -1  14   3 296.035 4.99944  -2 
   1 -12   3 296.035 4.99944   1 
  -2  14   3 24.8582 1.63840  -2 
   2 -12   3 24.8582 1.63840   1 
  -3  14   3 9.36304 1.54867  -2 
   3 -12   3 9.36304 1.54867   1 
  -4  14   3 179.836 3.83495  -2 
   4 -12   3 179.836 3.83495   1 
  -5  14   3 46.0711 2.19381  -2 
   5 -12   3 46.0711 2.19381   1 
  -6  14   3 104.635 3.99523  -2 
   6 -12   3 104.635 3.99523   1 
  -7  14   3 173.513 9.43506  -2 
   7 -12   3 173.513 9.43506   1 
  -8  14   3 39.6700 5.03098  -2 
   8 -12   3 39.6700 5.03098   1 
  12  13   3 7.17076 4.16906  -2 
 -12 -11   3 7.17076 4.16906   1 
 -11 -11   3 5.64627 1.75825   1 
  11  13   3 32.9119 4.32737  -2 
 -11 -11   3 32.9119 4.32737   1 
  10  13   3 18.7996 1.97329  -2 
 -10 -11   3 18.7996 1.97329   1 
   9  13   3 15.8748 1.80134  -2 
  -9 -11   3 15.8748 1.80134   1 
   8  13   3 628.642 9.60614  -2 
  -8 -11   3 628.642 9.60614   1 
   7  13   3 167.540 3.22956  -2 
  -7 -11   3 167.540 3.22956   1 
   6  13   3 192.290 3.67533  -2 
  -6 -11   3 192.290 3.67533   1 
  -6 -11   3 118.592 7.07825   1 
   5  13   3 16.6002 1.26104  -2 
  -5 -11   3 16.6002 1.26104   1 
  -5 -11   3 6.28808 1.29207   2 
   4  13   3 147.604 2.60196  -2 
  -4 -11   3 147.604 2.60196   1 
   3  13   3 3.90660 0.96495  -2 
  -3 -11   3 3.90660 0.96495   1 
   2  13   3 367.876 4.97629  -2 
  -2 -11   3 367.876 4.97629   1 
  -2 -11   3 24.7298 2.94208   2 
   1  13   3 109.967 2.23976  -2 
  -1 -11   3 109.967 2.23976   1 
  -1 -11   3 4.85386 1.84413   2 
   0  13   3 1005.69 13.1631  -2 
   0 -11   3 1005.69 13.1631   1 
  -1  13   3 73.0940 1.87267  -2 
   1 -11   3 73.0940 1.87267   1 
  -2  13   3 6.91250 1.27549  -2 
   2 -11   3 6.91250 1.27549   1 
  -3  13   3 32.2850 1.67774  -2 
   3 -11   3 32.2850 1.67774   1 
  -4  13   3 52.4936 2.02547  -2 
   4 -11   3 52.4936 2.02547   1 
  -5  13   3 24.6407 1.85138  -2 
   5 -11   3 24.6407 1.85138   1 
  -6  13   3 200.221 5.10847  -2 
   6 -11   3 200.221 5.10847   1 
  -7  13   3 182.292 7.23722  -2 
   7 -11   3 182.292 7.23722   1 
  -8  13   3 12.9391 4.26380  -2 
   8 -11   3 12.9391 4.26380   1 
  -9  13   3 14.2316 3.48373  -2 
   9 -11   3 14.2316 3.48373   1 
  12  12   3 10.6612 2.52049  -2 
 -12 -10   3 10.6612 2.52049   1 
  11  12   3 68.7246 3.24297  -2 
 -11 -10   3 68.7246 3.24297   1 
  10  12   3 9.04270 1.89873  -2 
 -10 -10   3 9.04270 1.89873   1 
   9  12   3 181.249 3.68346  -2 
  -9 -10   3 181.249 3.68346   1 
   8  12   3 143.327 2.99366  -2 
  -8 -10   3 143.327 2.99366   1 
   7  12   3 855.473 12.0032  -2 
  -7 -10   3 855.473 12.0032   1 
   6  12   3 152.756 2.90053  -2 
  -6 -10   3 152.756 2.90053   1 
   5  12   3 69.4357 1.69534  -2 
  -5 -10   3 69.4357 1.69534   1 
  -5 -10   3 2.49763 1.26836   2 
   4  12   3 224.587 3.31879  -2 
  -4 -10   3 224.587 3.31879   1 
   3  12   3 494.953 6.16792  -2 
  -3 -10   3 494.953 6.16792   1 
  -3 -10   3 276.545 12.9625   2 
   2  12   3 85.4791 1.69548  -2 
  -2 -10   3 85.4791 1.69548   1 
  -2 -10   3 65.8706 4.39535   2 
  -2 -10   3 67.5519 4.74192   1 
   1  12   3 1240.16 15.2425  -2 
  -1 -10   3 1240.16 15.2425   1 
  -1 -10   3 926.137 35.9841   2 
   0  12   3 492.660 6.42092  -2 
   0 -10   3 492.660 6.42092   1 
  -1  12   3 657.807 8.41215  -2 
   1 -10   3 657.807 8.41215   1 
  -2  12   3 37.9797 1.46383  -2 
   2 -10   3 37.9797 1.46383   1 
   2 -10   3 23.6095 2.63281   1 
  -3  12   3 423.782 6.73047  -2 
   3 -10   3 423.782 6.73047   1 
  -4  12   3 55.4783 1.95554  -2 
   4 -10   3 55.4783 1.95554   1 
  -5  12   3 71.8794 2.32429  -2 
   5 -10   3 71.8794 2.32429   1 
  -6  12   3 346.143 8.37570  -2 
   6 -10   3 346.143 8.37570   1 
  -7  12   3 338.363 9.54470  -2 
   7 -10   3 338.363 9.54470   1 
  -8  12   3 32.6776 3.27664  -2 
   8 -10   3 32.6776 3.27664   1 
  -9  12   3 12.4393 4.45656  -2 
   9 -10   3 12.4393 4.45656   1 
  13  11   3 86.3333 9.22629  -2 
 -13  -9   3 86.3333 9.22629   1 
  12  11   3 -0.7142 2.32393  -2 
 -12  -9   3 -0.7142 2.32393   1 
  11  11   3 34.2266 2.45748  -2 
 -11  -9   3 34.2266 2.45748   1 
  10  11   3 29.9331 2.18521  -2 
 -10  -9   3 29.9331 2.18521   1 
   9  11   3 94.8653 2.54172  -2 
  -9  -9   3 94.8653 2.54172   1 
   8  11   3 398.354 6.17294  -2 
  -8  -9   3 398.354 6.17294   1 
   7  11   3 216.244 3.74339  -2 
  -7  -9   3 216.244 3.74339   1 
   6  11   3 201.250 3.30566  -2 
  -6  -9   3 201.250 3.30566   1 
   5  11   3 100.174 1.91374  -2 
  -5  -9   3 100.174 1.91374   1 
   4  11   3 263.623 3.58181  -2 
  -4  -9   3 263.623 3.58181   1 
   3  11   3 149.447 2.12790  -2 
  -3  -9   3 149.447 2.12790   1 
  -3  -9   3 108.157 6.19366   2 
  -2  -9   3 110.427 6.25489   1 
   2  11   3 634.030 7.63057  -2 
  -2  -9   3 634.030 7.63057   1 
  -2  -9   3 106.847 3.47951   2 
   1  11   3 512.926 6.29187  -2 
  -1  -9   3 512.926 6.29187   1 
   0  11   3 1340.16 16.3975  -2 
   0  -9   3 1340.16 16.3975   1 
   0  -9   3 854.092 34.5558   1 
  -1  11   3 268.181 3.60664  -2 
   1  -9   3 268.181 3.60664   1 
  -2  11   3 212.118 3.04043  -2 
   2  -9   3 212.118 3.04043   1 
  -3  11   3 135.414 2.37108  -2 
   3  -9   3 135.414 2.37108   1 
  -4  11   3 138.375 2.73752  -2 
   4  -9   3 138.375 2.73752   1 
  -5  11   3 152.919 3.61566  -2 
   5  -9   3 152.919 3.61566   1 
  -6  11   3 449.885 10.3123  -2 
   6  -9   3 449.885 10.3123   1 
  -7  11   3 129.697 4.25803  -2 
   7  -9   3 129.697 4.25803   1 
  -8  11   3 2.29047 3.20352  -2 
   8  -9   3 2.29047 3.20352   1 
  -9  11   3 12.4618 4.27936  -2 
   9  -9   3 12.4618 4.27936   1 
 -10  11   3 21.9495 3.52000  -2 
  10  -9   3 21.9495 3.52000   1 
  13  10   3 61.6664 8.31920  -2 
 -13  -8   3 61.6664 8.31920   1 
  12  10   3 24.0162 2.72989  -2 
 -12  -8   3 24.0162 2.72989   1 
  11  10   3 156.712 4.43204  -2 
 -11  -8   3 156.712 4.43204   1 
  10  10   3 33.5181 2.03064  -2 
 -10  -8   3 33.5181 2.03064   1 
   9  10   3 40.1824 1.94826  -2 
  -9  -8   3 40.1824 1.94826   1 
   8  10   3 72.4949 2.03168  -2 
  -8  -8   3 72.4949 2.03168   1 
   7  10   3 202.424 3.36758  -2 
  -7  -8   3 202.424 3.36758   1 
   6  10   3 9.59832 1.02036  -2 
  -6  -8   3 9.59832 1.02036   1 
   5  10   3 287.119 3.85457  -2 
  -5  -8   3 287.119 3.85457   1 
   4  10   3 57.5267 1.24101  -2 
  -4  -8   3 57.5267 1.24101   1 
  -4  -8   3 9.88232 1.27899   2 
  -4  -8   3 7.90989 1.88656   1 
   3  10   3 354.556 4.22379  -2 
  -3  -8   3 354.556 4.22379   1 
  -3  -8   3 37.2125 3.28460   2 
   2  10   3 104.659 1.80754  -2 
  -2  -8   3 104.659 1.80754   1 
  -2  -8   3 97.9247 3.85021   1 
  -2  -8   3 98.7074 3.95201   2 
   1  10   3 111.144 1.81790  -2 
  -1  -8   3 111.144 1.81790   1 
  -1  -8   3 100.420 3.11445   2 
  -1  -8   3 101.296 5.63675   1 
   0  10   3 407.028 4.94904  -2 
   0  -8   3 407.028 4.94904   1 
  -1  10   3 58.8643 1.29929  -2 
   1  -8   3 58.8643 1.29929   1 
   1  -8   3 12.3696 1.69810   1 
  -2  10   3 154.356 2.30770  -2 
   2  -8   3 154.356 2.30770   1 
  -3  10   3 613.253 7.53254  -2 
   3  -8   3 613.253 7.53254   1 
  -4  10   3 45.3526 1.40238  -2 
   4  -8   3 45.3526 1.40238   1 
  -5  10   3 87.2842 2.29093  -2 
   5  -8   3 87.2842 2.29093   1 
  -6  10   3 234.100 4.92638  -2 
   6  -8   3 234.100 4.92638   1 
  -7  10   3 86.7301 3.16162  -2 
   7  -8   3 86.7301 3.16162   1 
  -8  10   3 24.9608 3.56675  -2 
   8  -8   3 24.9608 3.56675   1 
  -9  10   3 -1.7785 3.24943  -2 
   9  -8   3 -1.7785 3.24943   1 
 -10  10   3 46.1006 3.95746  -2 
  10  -8   3 46.1006 3.95746   1 
  13   9   3 37.5263 3.43287  -2 
 -13  -7   3 37.5263 3.43287   1 
  12   9   3 119.760 4.28578  -2 
 -12  -7   3 119.760 4.28578   1 
  11   9   3 33.3773 2.39814  -2 
 -11  -7   3 33.3773 2.39814   1 
  10   9   3 54.5512 2.32960  -2 
 -10  -7   3 54.5512 2.32960   1 
   9   9   3 14.0390 1.56960  -2 
  -9  -7   3 14.0390 1.56960   1 
   8   9   3 114.467 2.52564  -2 
  -8  -7   3 114.467 2.52564   1 
   7   9   3 208.620 3.41603  -2 
  -7  -7   3 208.620 3.41603   1 
   6   9   3 199.454 2.93065  -2 
  -6  -7   3 199.454 2.93065   1 
   5   9   3 70.4489 1.35631  -2 
  -5  -7   3 70.4489 1.35631   1 
   4   9   3 5.01070 0.68096  -2 
  -4  -7   3 5.01070 0.68096   1 
   3   9   3 111.080 1.78669  -2 
  -3  -7   3 111.080 1.78669   1 
  -3  -7   3 29.0517 2.56675   1 
   2   9   3 141.652 2.42692  -2 
  -2  -7   3 141.652 2.42692   1 
  -2  -7   3 0.98116 0.63942   1 
  -2  -7   3 0.57979 0.62517   2 
   1   9   3 184.035 2.85844  -2 
  -1  -7   3 184.035 2.85844   1 
  -1  -7   3 21.1540 1.25687   2 
  -1  -7   3 19.0439 1.45904   1 
   0   9   3 283.699 3.88255  -2 
   0  -7   3 283.699 3.88255   1 
   0  -7   3 170.730 5.51146   1 
   0  -7   3 167.013 11.5579   2 
  -1   9   3 596.783 7.68635  -2 
   1  -7   3 596.783 7.68635   1 
   1  -7   3 568.493 16.7316   1 
  -2   9   3 170.553 2.38848  -2 
   2  -7   3 170.553 2.38848   1 
  -3   9   3 157.136 2.35603  -2 
   3  -7   3 157.136 2.35603   1 
  -4   9   3 42.6176 1.25592  -2 
   4  -7   3 42.6176 1.25592   1 
  -5   9   3 329.887 4.86669  -2 
   5  -7   3 329.887 4.86669   1 
  -6   9   3 17.4161 1.48222  -2 
   6  -7   3 17.4161 1.48222   1 
  -7   9   3 237.574 5.06235  -2 
   7  -7   3 237.574 5.06235   1 
  -8   9   3 4.68960 2.56537  -2 
   8  -7   3 4.68960 2.56537   1 
  -9   9   3 57.7769 4.28287  -2 
   9  -7   3 57.7769 4.28287   1 
 -10   9   3 3.03037 4.14463  -2 
  10  -7   3 3.03037 4.14463   1 
 -11   9   3 92.8339 5.17339  -2 
  11  -7   3 92.8339 5.17339   1 
  13   8   3 42.1826 5.27253  -2 
 -13  -6   3 42.1826 5.27253   1 
  12   8   3 67.8852 3.32955  -2 
 -12  -6   3 67.8852 3.32955   1 
  11   8   3 82.8490 3.17857  -2 
 -11  -6   3 82.8490 3.17857   1 
  10   8   3 27.2274 1.96933  -2 
 -10  -6   3 27.2274 1.96933   1 
   9   8   3 36.1798 1.83974  -2 
  -9  -6   3 36.1798 1.83974   1 
   8   8   3 160.926 3.49638  -2 
  -8  -6   3 160.926 3.49638   1 
   7   8   3 181.865 3.06164  -2 
  -7  -6   3 181.865 3.06164   1 
   6   8   3 78.8822 1.56210  -2 
  -6  -6   3 78.8822 1.56210   1 
   5   8   3 69.7209 1.31441  -2 
  -5  -6   3 69.7209 1.31441   1 
  -5  -6   3 56.7289 4.19183   2 
  -5  -6   3 72.2614 3.79989   1 
   4   8   3 219.385 3.14205  -2 
  -4  -6   3 219.385 3.14205   1 
  -4  -6   3 85.5153 2.89354   2 
  -4  -6   3 81.6312 3.44120   1 
  -3  -6   3 70.1591 2.73992   2 
  -3  -6   3 71.4358 3.35030   1 
   3   8   3 386.628 4.99088  -2 
  -3  -6   3 386.628 4.99088   1 
   2   8   3 50.4469 1.10107  -2 
  -2  -6   3 50.4469 1.10107   1 
  -2  -6   3 16.9090 1.18956   2 
  -2  -6   3 17.3652 1.87972   1 
   1   8   3 231.387 3.41045  -2 
  -1  -6   3 231.387 3.41045   1 
  -1  -6   3 2.18151 0.64267   1 
  -1  -6   3 3.59677 1.19437   2 
   0   8   3 59.9338 1.24922  -2 
   0  -6   3 59.9338 1.24922   1 
   0  -6   3 29.0969 1.84664   2 
   0  -6   3 30.3777 1.59760   1 
  -1   8   3 30.6793 0.87706  -2 
   1  -6   3 30.6793 0.87706   1 
   1  -6   3 8.90771 1.70405   1 
   1  -6   3 5.89735 1.32375   2 
  -2   8   3 43.0242 1.07835  -2 
   2  -6   3 43.0242 1.07835   1 
   2  -6   3 19.6418 1.33839   1 
  -3   8   3 191.634 2.62146  -2 
   3  -6   3 191.634 2.62146   1 
   3  -6   3 30.8025 2.57672   2 
  -4   8   3 167.390 2.49667  -2 
   4  -6   3 167.390 2.49667   1 
  -5   8   3 10.5560 1.01929  -2 
   5  -6   3 10.5560 1.01929   1 
  -6   8   3 194.943 3.29907  -2 
   6  -6   3 194.943 3.29907   1 
  -7   8   3 54.4150 2.24602  -2 
   7  -6   3 54.4150 2.24602   1 
  -8   8   3 17.1582 3.04457  -2 
   8  -6   3 17.1582 3.04457   1 
  -9   8   3 14.6879 3.35755  -2 
   9  -6   3 14.6879 3.35755   1 
 -10   8   3 15.4951 4.16585  -2 
  10  -6   3 15.4951 4.16585   1 
 -11   8   3 82.4862 4.83304  -2 
  11  -6   3 82.4862 4.83304   1 
  13   7   3 37.3944 3.48121  -2 
 -13  -5   3 37.3944 3.48121   1 
  12   7   3 85.0978 3.99218  -2 
 -12  -5   3 85.0978 3.99218   1 
  11   7   3 14.2696 2.08033  -2 
 -11  -5   3 14.2696 2.08033   1 
  10   7   3 36.3318 2.09158  -2 
 -10  -5   3 36.3318 2.09158   1 
   9   7   3 20.9176 1.67805  -2 
  -9  -5   3 20.9176 1.67805   1 
   8   7   3 1007.52 14.9927  -2 
  -8  -5   3 1007.52 14.9927   1 
   7   7   3 71.0843 1.73893  -2 
  -7  -5   3 71.0843 1.73893   1 
   6   7   3 37.9835 1.11315  -2 
  -6  -5   3 37.9835 1.11315   1 
   5   7   3 47.9178 1.15172  -2 
  -5  -5   3 47.9178 1.15172   1 
  -5  -5   3 41.4984 2.45259   2 
  -5  -5   3 41.1567 3.44501   1 
  -4  -5   3 68.6341 2.47148   1 
   4   7   3 183.457 2.80080  -2 
  -4  -5   3 183.457 2.80080   1 
  -4  -5   3 71.2026 2.22396   2 
   3   7   3 201.823 3.50064  -2 
  -3  -5   3 201.823 3.50064   1 
  -3  -5   3 186.318 4.26871   2 
  -3  -5   3 180.870 3.52338   1 
   2   7   3 1551.18 19.6624  -2 
  -2  -5   3 1551.18 19.6624   1 
  -2  -5   3 1050.56 17.9912   2 
  -2  -5   3 1038.89 31.4410   1 
   1   7   3 57.0900 1.07751  -2 
  -1  -5   3 57.0900 1.07751   1 
  -1  -5   3 16.9820 1.14347   2 
  -1  -5   3 17.4142 2.45283   1 
   0   7   3 27.2972 0.88179  -2 
   0  -5   3 27.2972 0.88179   1 
   0  -5   3 21.2438 1.50579   2 
   0  -5   3 20.7513 1.14000   1 
  -1   7   3 212.244 2.85709  -2 
   1  -5   3 212.244 2.85709   1 
   1  -5   3 70.2101 2.76280   2 
   1  -5   3 68.8525 5.67257   1 
   2  -5   3 559.043 22.6868   1 
  -2   7   3 863.821 10.8667  -2 
   2  -5   3 863.821 10.8667   1 
  -3   7   3 209.752 2.88712  -2 
   3  -5   3 209.752 2.88712   1 
   3  -5   3 163.789 7.92517   1 
  -4   7   3 44.0230 1.11819  -2 
   4  -5   3 44.0230 1.11819   1 
  -5   7   3 249.026 3.46034  -2 
   5  -5   3 249.026 3.46034   1 
  -6   7   3 202.294 3.19281  -2 
   6  -5   3 202.294 3.19281   1 
   6  -5   3 15.0282 1.84813   2 
  -7   7   3 64.4666 2.19934  -2 
   7  -5   3 64.4666 2.19934   1 
  -8   7   3 57.4699 3.38322  -2 
   8  -5   3 57.4699 3.38322   1 
  -9   7   3 115.646 5.41133  -2 
   9  -5   3 115.646 5.41133   1 
 -10   7   3 12.4784 4.21031  -2 
  10  -5   3 12.4784 4.21031   1 
 -11   7   3 91.5569 6.73380  -2 
  11  -5   3 91.5569 6.73380   1 
 -12   7   3 244.321 9.03417  -2 
  12  -5   3 244.321 9.03417   1 
  13   6   3 41.3275 3.52624  -2 
 -13  -4   3 41.3275 3.52624   1 
  12   6   3 71.5880 3.43808  -2 
 -12  -4   3 71.5880 3.43808   1 
  11   6   3 57.3693 3.34708  -2 
 -11  -4   3 57.3693 3.34708   1 
  10   6   3 47.2947 2.23379  -2 
 -10  -4   3 47.2947 2.23379   1 
   9   6   3 310.426 5.78797  -2 
  -9  -4   3 310.426 5.78797   1 
   8   6   3 486.405 7.72703  -2 
  -8  -4   3 486.405 7.72703   1 
   7   6   3 374.617 5.44075  -2 
  -7  -4   3 374.617 5.44075   1 
   6   6   3 270.725 3.57653  -2 
  -6  -4   3 270.725 3.57653   1 
  -6  -4   3 66.4305 3.93045   1 
  -5  -4   3 43.9748 2.29451   1 
   5   6   3 187.729 2.81912  -2 
  -5  -4   3 187.729 2.81912   1 
  -5  -4   3 42.9366 1.58710   2 
  -4  -4   3 27.4862 0.90927   2 
   4   6   3 158.418 2.80543  -2 
  -4  -4   3 158.418 2.80543   1 
  -4  -4   3 27.1546 1.10816   1 
  -3  -4   3 892.318 10.6184   2 
  -3  -4   3 897.611 12.4374   1 
   3   6   3 1831.16 41.0355  -2 
  -3  -4   3 1831.16 41.0355   1 
  -2  -4   3 423.569 6.39707   1 
  -2  -4   3 420.259 6.25147   2 
   2   6   3 1250.37 24.4713  -2 
  -2  -4   3 1250.37 24.4713   1 
   1   6   3 367.887 5.41024  -2 
  -1  -4   3 367.887 5.41024   1 
  -1  -4   3 177.182 3.99971   2 
  -1  -4   3 172.965 4.28726   1 
   0  -4   3 172.833 3.95875   1 
   0   6   3 262.191 4.25815  -2 
   0  -4   3 262.191 4.25815   1 
   0  -4   3 172.477 5.65993   2 
  -1   6   3 1088.74 15.6310  -2 
   1  -4   3 1088.74 15.6310   1 
   1  -4   3 513.947 12.7018   1 
   1  -4   3 550.341 21.1014   2 
   2  -4   3 19.6926 1.74883   1 
  -2   6   3 38.4640 1.16301  -2 
   2  -4   3 38.4640 1.16301   1 
   2  -4   3 17.5191 1.27308   2 
  -3   6   3 34.6474 0.91190  -2 
   3  -4   3 34.6474 0.91190   1 
   3  -4   3 4.52300 1.26092   2 
   4  -4   3 153.105 7.18219   1 
  -4   6   3 376.622 4.86464  -2 
   4  -4   3 376.622 4.86464   1 
   4  -4   3 152.554 7.20525   2 
  -5   6   3 192.175 2.78678  -2 
   5  -4   3 192.175 2.78678   1 
   5  -4   3 158.432 7.19523   2 
  -6   6   3 21.5081 1.13031  -2 
   6  -4   3 21.5081 1.13031   1 
   6  -4   3 25.0428 3.98288   1 
  -7   6   3 190.485 3.28201  -2 
   7  -4   3 190.485 3.28201   1 
  -8   6   3 43.0090 2.39158  -2 
   8  -4   3 43.0090 2.39158   1 
  -9   6   3 54.6984 3.41799  -2 
   9  -4   3 54.6984 3.41799   1 
 -10   6   3 -1.5443 3.73855  -2 
  10  -4   3 -1.5443 3.73855   1 
 -11   6   3 98.1091 6.89083  -2 
  11  -4   3 98.1091 6.89083   1 
 -12   6   3 10.2724 4.38145  -2 
  12  -4   3 10.2724 4.38145   1 
  13   5   3 36.1547 3.03272  -2 
 -13  -3   3 36.1547 3.03272   1 
  12   5   3 130.507 4.52884  -2 
 -12  -3   3 130.507 4.52884   1 
  11   5   3 78.9369 3.30237  -2 
 -11  -3   3 78.9369 3.30237   1 
  10   5   3 61.6298 2.54867  -2 
 -10  -3   3 61.6298 2.54867   1 
   9   5   3 307.139 5.72865  -2 
  -9  -3   3 307.139 5.72865   1 
   8   5   3 596.919 9.26079  -2 
  -8  -3   3 596.919 9.26079   1 
   7   5   3 29.3157 1.23879  -2 
  -7  -3   3 29.3157 1.23879   1 
   6   5   3 100.149 1.88347  -2 
  -6  -3   3 100.149 1.88347   1 
  -6  -3   3 60.6784 3.68503   1 
  -5  -3   3 0.48228 0.43955   2 
  -5  -3   3 2.12374 0.43780   1 
   5   5   3 0.95668 0.88316  -2 
  -5  -3   3 0.95668 0.88316   1 
  -4  -3   3 88.4446 1.42527   1 
  -4  -3   3 87.8632 1.40960   2 
   4   5   3 293.333 10.4407  -2 
  -4  -3   3 293.333 10.4407   1 
  -3  -3   3 1854.26 22.5857   1 
  -3  -3   3 1884.46 23.0248   2 
   3   5   3 2389.66 93.4407  -2 
  -3  -3   3 2389.66 93.4407   1 
  -2  -3   3 580.634 7.60025   2 
  -2  -3   3 583.841 7.67594   1 
   2   5   3 1467.51 58.5296  -2 
  -2  -3   3 1467.51 58.5296   1 
  -1  -3   3 41.8343 0.78789   2 
  -1  -3   3 42.2986 1.11003   1 
   1   5   3 510.737 9.04206  -2 
  -1  -3   3 510.737 9.04206   1 
   0  -3   3 0.46644 0.42917   2 
   0  -3   3 0.38512 0.27881   1 
   0   5   3 79.3455 2.05320  -2 
   0  -3   3 79.3455 2.05320   1 
  -1   5   3 184.095 3.51791  -2 
   1  -3   3 184.095 3.51791   1 
   1  -3   3 82.6171 1.96346   1 
   1  -3   3 80.6418 1.87125   2 
   2  -3   3 5.06780 0.49996   2 
  -2   5   3 12.8154 1.47234  -2 
   2  -3   3 12.8154 1.47234   1 
   2  -3   3 4.51608 0.35618   1 
  -3   5   3 780.388 14.5887  -2 
   3  -3   3 780.388 14.5887   1 
   3  -3   3 523.723 8.40577   1 
   3  -3   3 529.457 11.0282   2 
  -4   5   3 556.070 7.19999  -2 
   4  -3   3 556.070 7.19999   1 
   4  -3   3 434.052 13.0186   2 
   4  -3   3 439.654 13.3402   1 
  -5   5   3 113.619 1.86851  -2 
   5  -3   3 113.619 1.86851   1 
  -6   5   3 809.263 9.81460  -2 
   6  -3   3 809.263 9.81460   1 
  -7   5   3 11.4488 1.16691  -2 
   7  -3   3 11.4488 1.16691   1 
  -8   5   3 34.2485 1.66084  -2 
   8  -3   3 34.2485 1.66084   1 
  -9   5   3 16.9550 3.11280  -2 
   9  -3   3 16.9550 3.11280   1 
 -10   5   3 -3.3661 3.74825  -2 
  10  -3   3 -3.3661 3.74825   1 
 -11   5   3 55.4537 5.55551  -2 
  11  -3   3 55.4537 5.55551   1 
 -12   5   3 163.255 9.33426  -2 
  12  -3   3 163.255 9.33426   1 
  13   4   3 7.41481 2.46650  -2 
 -13  -2   3 7.41481 2.46650   1 
  12   4   3 76.7904 4.31955  -2 
 -12  -2   3 76.7904 4.31955   1 
  11   4   3 237.213 6.44080  -2 
 -11  -2   3 237.213 6.44080   1 
  10   4   3 125.382 3.36684  -2 
 -10  -2   3 125.382 3.36684   1 
   9   4   3 257.299 5.35307  -2 
  -9  -2   3 257.299 5.35307   1 
   8   4   3 236.007 4.25029  -2 
  -8  -2   3 236.007 4.25029   1 
   7   4   3 91.4721 1.91920  -2 
  -7  -2   3 91.4721 1.91920   1 
   6   4   3 51.2270 1.19148  -2 
  -6  -2   3 51.2270 1.19148   1 
  -6  -2   3 32.3858 3.70672   1 
  -5  -2   3 82.3502 1.81234   2 
  -5  -2   3 76.8323 1.94450   1 
   5   4   3 377.252 7.55536  -2 
  -5  -2   3 377.252 7.55536   1 
  -4  -2   3 263.930 3.61623   2 
  -4  -2   3 258.082 3.19735   1 
  -3  -2   3 1657.66 19.3128   2 
  -3  -2   3 1644.69 19.1424   1 
   3   4   3 3419.12 135.997  -2 
  -3  -2   3 3419.12 135.997   1 
  -2  -2   3 489.189 5.82840   2 
  -2  -2   3 488.212 6.42851   1 
  -1  -2   3 13.8383 0.50836   1 
  -1  -2   3 14.8163 0.42658   2 
   1   4   3 33.4492 1.16368  -2 
  -1  -2   3 33.4492 1.16368   1 
   0  -2   3 103.582 1.77947   2 
   0  -2   3 100.171 1.72799   1 
   0   4   3 316.018 9.72569  -2 
   0  -2   3 316.018 9.72569   1 
   1  -2   3 719.373 12.6517   2 
   1  -2   3 709.663 11.2181   1 
  -1   4   3 1045.57 29.6023  -2 
   1  -2   3 1045.57 29.6023   1 
   2  -2   3 85.3197 1.36404   1 
   2  -2   3 83.7021 1.53515   2 
  -2   4   3 518.350 20.7183  -2 
   2  -2   3 518.350 20.7183   1 
   3  -2   3 567.585 8.55942   2 
  -3   4   3 1132.67 31.8966  -2 
   3  -2   3 1132.67 31.8966   1 
   3  -2   3 569.219 7.63359   1 
  -4   4   3 750.169 16.4729  -2 
   4  -2   3 750.169 16.4729   1 
   4  -2   3 103.140 2.23251   2 
   4  -2   3 103.996 1.98140   1 
  -5   4   3 607.236 7.56448  -2 
   5  -2   3 607.236 7.56448   1 
   5  -2   3 402.403 17.1293   1 
   5  -2   3 350.514 14.7155   2 
  -6   4   3 115.858 2.00019  -2 
   6  -2   3 115.858 2.00019   1 
  -7   4   3 109.118 2.05968  -2 
   7  -2   3 109.118 2.05968   1 
  -8   4   3 92.9426 2.16679  -2 
   8  -2   3 92.9426 2.16679   1 
  -9   4   3 158.224 4.68820  -2 
   9  -2   3 158.224 4.68820   1 
 -10   4   3 131.347 5.80647  -2 
  10  -2   3 131.347 5.80647   1 
 -11   4   3 150.127 6.28318  -2 
  11  -2   3 150.127 6.28318   1 
 -12   4   3 5.12135 4.54465  -2 
  12  -2   3 5.12135 4.54465   1 
  13   3   3 39.9379 3.23300  -2 
 -13  -1   3 39.9379 3.23300   1 
  12   3   3 78.2786 4.39099  -2 
 -12  -1   3 78.2786 4.39099   1 
  11   3   3 59.4428 2.75543  -2 
 -11  -1   3 59.4428 2.75543   1 
  10   3   3 87.0143 2.82988  -2 
 -10  -1   3 87.0143 2.82988   1 
   9   3   3 90.0034 2.59324  -2 
  -9  -1   3 90.0034 2.59324   1 
   8   3   3 117.699 2.79545  -2 
  -8  -1   3 117.699 2.79545   1 
   7   3   3 197.563 3.16349  -2 
  -7  -1   3 197.563 3.16349   1 
   6   3   3 1018.61 12.4028  -2 
  -6  -1   3 1018.61 12.4028   1 
  -6  -1   3 351.690 15.1487   1 
  -6  -1   3 344.902 10.9720   2 
  -5  -1   3 36.8570 0.98465   1 
  -5  -1   3 39.0162 1.01286   2 
   5   3   3 444.582 18.2513  -2 
  -5  -1   3 444.582 18.2513   1 
  -4  -1   3 159.204 2.41221   1 
  -4  -1   3 162.555 2.36540   2 
   4   3   3 272.950 11.3118  -2 
  -4  -1   3 272.950 11.3118   1 
  -3  -1   3 303.295 4.14705   1 
  -3  -1   3 310.081 4.03932   2 
   3   3   3 439.110 17.6941  -2 
  -3  -1   3 439.110 17.6941   1 
  -2  -1   3 863.365 10.5643   2 
  -2  -1   3 845.574 10.9289   1 
  -1  -1   3 211.032 2.98067   1 
  -1  -1   3 212.325 2.57510   2 
   1   3   3 380.428 10.7566  -2 
  -1  -1   3 380.428 10.7566   1 
   0  -1   3 882.421 12.4599   1 
   0  -1   3 908.208 12.7838   2 
   0   3   3 1785.94 70.0113  -2 
   0  -1   3 1785.94 70.0113   1 
  -1   3   3 930.068 36.4045  -2 
   1  -1   3 930.068 36.4045   1 
   1  -1   3 658.536 8.71552   2 
   1  -1   3 642.612 8.86834   1 
   2  -1   3 78.0275 1.36775   2 
   2  -1   3 76.2516 1.33361   1 
  -2   3   3 752.257 30.1410  -2 
   2  -1   3 752.257 30.1410   1 
   3  -1   3 1099.87 14.2921   2 
   3  -1   3 1111.47 14.3058   1 
  -3   3   3 1906.23 76.0622  -2 
   3  -1   3 1906.23 76.0622   1 
   4  -1   3 547.154 7.61259   2 
   4  -1   3 546.132 7.42107   1 
  -4   3   3 909.517 25.8362  -2 
   4  -1   3 909.517 25.8362   1 
  -5   3   3 15.9035 1.05753  -2 
   5  -1   3 15.9035 1.05753   1 
   5  -1   3 14.2609 0.94701   1 
   5  -1   3 14.6136 1.66718   2 
  -6   3   3 239.948 3.47139  -2 
   6  -1   3 239.948 3.47139   1 
  -7   3   3 106.120 2.08523  -2 
   7  -1   3 106.120 2.08523   1 
  -8   3   3 136.574 2.79081  -2 
   8  -1   3 136.574 2.79081   1 
  -9   3   3 136.836 3.39909  -2 
   9  -1   3 136.836 3.39909   1 
 -10   3   3 300.412 7.60919  -2 
  10  -1   3 300.412 7.60919   1 
 -11   3   3 21.2394 4.33006  -2 
  11  -1   3 21.2394 4.33006   1 
 -12   3   3 111.576 5.47378  -2 
  12  -1   3 111.576 5.47378   1 
 -13   3   3 28.0771 5.33545  -2 
  13  -1   3 28.0771 5.33545   1 
  13   2   3 3.00809 2.74844  -2 
 -13   0   3 3.00809 2.74844   1 
  12   2   3 39.3578 3.81661  -2 
 -12   0   3 39.3578 3.81661   1 
  11   2   3 9.19921 2.01910  -2 
 -11   0   3 9.19921 2.01910   1 
  10   2   3 85.8434 2.80923  -2 
 -10   0   3 85.8434 2.80923   1 
   9   2   3 375.904 6.28964  -2 
  -9   0   3 375.904 6.28964   1 
   8   2   3 68.0425 1.98992  -2 
  -8   0   3 68.0425 1.98992   1 
   7   2   3 646.350 8.59413  -2 
  -7   0   3 646.350 8.59413   1 
  -6   0   3 36.9683 2.12443   2 
   6   2   3 40.0680 1.16044  -2 
  -6   0   3 40.0680 1.16044   1 
  -6   0   3 36.0114 2.71681   1 
  -5   0   3 299.133 3.95781   2 
  -5   0   3 294.141 4.28096   1 
   5   2   3 448.630 18.4100  -2 
  -5   0   3 448.630 18.4100   1 
   4   2   3 56.0417 2.77009  -2 
  -4   0   3 56.0417 2.77009   1 
  -4   0   3 21.2576 0.64033   2 
  -4   0   3 19.9442 0.63758   1 
  -3   0   3 874.605 11.4817   2 
  -3   0   3 856.938 11.8809   1 
  -2   0   3 10.9874 0.41212   2 
  -2   0   3 10.3350 0.34276   1 
  -1   0   3 2024.90 28.7224   1 
  -1   0   3 2021.66 24.5040   2 
   0   0   3 156.788 4.33501   1 
   0   0   3 166.400 4.60256   2 
   0   2   3 295.751 11.8164  -2 
   0   0   3 295.751 11.8164   1 
   1   0   3 666.311 9.03290   2 
   1   0   3 656.111 9.01772   1 
   2   0   3 194.852 2.82318   2 
   2   0   3 191.636 2.82593   1 
   3   0   3 478.697 6.07929   1 
   3   0   3 477.361 6.34036   2 
   4   0   3 110.743 1.76254   1 
   4   0   3 109.725 1.83188   2 
  -4   2   3 272.716 11.4739  -2 
   4   0   3 272.716 11.4739   1 
   5   0   3 299.211 5.47612   1 
  -5   2   3 387.842 7.85023  -2 
   5   0   3 387.842 7.85023   1 
   5   0   3 304.398 6.15377   2 
  -6   2   3 35.3741 1.32403  -2 
   6   0   3 35.3741 1.32403   1 
   6   0   3 21.7640 2.20045   1 
  -7   2   3 301.487 4.55611  -2 
   7   0   3 301.487 4.55611   1 
  -8   2   3 15.7483 1.47406  -2 
   8   0   3 15.7483 1.47406   1 
  -9   2   3 522.499 8.72460  -2 
   9   0   3 522.499 8.72460   1 
 -10   2   3 104.502 4.30346  -2 
  10   0   3 104.502 4.30346   1 
 -11   2   3 28.8274 3.04147  -2 
  11   0   3 28.8274 3.04147   1 
 -12   2   3 33.6915 2.91109  -2 
  12   0   3 33.6915 2.91109   1 
 -13   2   3 38.6211 5.40271  -2 
  13   0   3 38.6211 5.40271   1 
  13   1   3 56.8562 8.44060  -2 
 -13   1   3 56.8562 8.44060   1 
  12   1   3 4.23179 2.78493  -2 
 -12   1   3 4.23179 2.78493   1 
  11   1   3 25.9638 2.96540  -2 
 -11   1   3 25.9638 2.96540   1 
  10   1   3 120.117 3.30883  -2 
 -10   1   3 120.117 3.30883   1 
   9   1   3 39.7170 1.78758  -2 
  -9   1   3 39.7170 1.78758   1 
   8   1   3 47.5093 1.73085  -2 
  -8   1   3 47.5093 1.73085   1 
   7   1   3 561.743 7.52087  -2 
  -7   1   3 561.743 7.52087   1 
   6   1   3 52.5638 1.15540  -2 
  -6   1   3 52.5638 1.15540   1 
  -6   1   3 1.78911 1.01991   2 
  -6   1   3 -2.5333 1.32693   1 
  -5   1   3 195.981 3.28320   1 
  -5   1   3 198.927 2.87035   2 
   5   1   3 248.563 5.96721  -2 
  -5   1   3 248.563 5.96721   1 
  -4   1   3 61.9292 1.16503   2 
  -4   1   3 61.1403 1.10366   1 
   4   1   3 147.390 6.33820  -2 
  -4   1   3 147.390 6.33820   1 
  -3   1   3 66.9969 1.15658   2 
  -3   1   3 64.2475 1.12220   1 
   3   1   3 546.863 21.9652  -2 
  -3   1   3 546.863 21.9652   1 
  -2   1   3 30.6324 0.56904   1 
  -2   1   3 32.1525 0.68220   2 
  -1   1   3 1320.02 16.9618   2 
  -1   1   3 1282.64 22.4519   1 
   1   1   3 1522.30 25.4032   2 
   1   1   3 1543.55 19.8221   1 
   2   1   3 1.66497 0.20980   2 
   2   1   3 1.59990 0.26337   1 
   3   1   3 440.313 5.87318   2 
   3   1   3 447.509 5.69217   1 
   4   1   3 81.1248 1.31331   1 
   4   1   3 78.4503 1.31333   2 
   5   1   3 57.2612 1.17219   1 
   5   1   3 54.5001 1.32348   2 
  -5   1   3 265.274 14.1035  -2 
   5   1   3 265.274 14.1035   1 
  -6   1   3 51.1692 1.37888  -2 
   6   1   3 51.1692 1.37888   1 
   6   1   3 52.2343 3.35899   1 
  -7   1   3 565.569 7.44034  -2 
   7   1   3 565.569 7.44034   1 
  -8   1   3 51.0977 1.70746  -2 
   8   1   3 51.0977 1.70746   1 
  -9   1   3 38.4566 2.01155  -2 
   9   1   3 38.4566 2.01155   1 
 -10   1   3 118.722 5.04328  -2 
  10   1   3 118.722 5.04328   1 
 -11   1   3 18.5634 2.91394  -2 
  11   1   3 18.5634 2.91394   1 
 -12   1   3 3.52119 2.70344  -2 
  12   1   3 3.52119 2.70344   1 
 -13   1   3 46.2260 5.43332  -2 
  13   1   3 46.2260 5.43332   1 
  13   0   3 29.3026 3.57186  -2 
 -13   2   3 29.3026 3.57186   1 
  12   0   3 29.1520 3.53402  -2 
 -12   2   3 29.1520 3.53402   1 
  11   0   3 26.0810 3.05573  -2 
 -11   2   3 26.0810 3.05573   1 
  10   0   3 102.699 3.07157  -2 
 -10   2   3 102.699 3.07157   1 
   9   0   3 528.659 8.41109  -2 
  -9   2   3 528.659 8.41109   1 
   8   0   3 14.9270 1.30853  -2 
  -8   2   3 14.9270 1.30853   1 
   7   0   3 297.542 4.25675  -2 
  -7   2   3 297.542 4.25675   1 
   6   0   3 36.6867 1.01519  -2 
  -6   2   3 36.6867 1.01519   1 
  -6   2   3 14.9666 1.90336   2 
  -5   2   3 84.5085 2.25413   1 
   5   0   3 381.642 6.42794  -2 
  -5   2   3 381.642 6.42794   1 
  -5   2   3 87.4793 1.78643   2 
  -4   2   3 161.951 2.49342   2 
  -4   2   3 159.165 2.59335   1 
   4   0   3 270.485 8.05502  -2 
  -4   2   3 270.485 8.05502   1 
  -3   2   3 356.301 4.59682   2 
  -3   2   3 344.950 4.66986   1 
  -2   2   3 74.6453 1.09787   1 
  -2   2   3 74.2192 1.24637   2 
  -1   2   3 710.892 8.58897   1 
  -1   2   3 698.637 9.17262   2 
   1   0   3 1589.18 64.7877  -2 
  -1   2   3 1589.18 64.7877   1 
   0   0   3 315.009 12.6025  -2 
   0   2   3 315.009 12.6025   1 
   1   2   3 2298.94 27.6479   1 
   1   2   3 2311.37 35.0986   2 
   2   2   3 1.25645 0.20040   2 
   2   2   3 1.20225 0.25898   1 
   3   2   3 800.969 11.1224   2 
   3   2   3 809.500 10.6479   1 
   4   2   3 35.6592 0.83595   2 
   4   2   3 35.6589 0.78317   1 
   5   2   3 135.289 2.13910   2 
   5   2   3 131.854 2.17655   1 
  -5   0   3 449.056 18.6571  -2 
   5   2   3 449.056 18.6571   1 
  -6   0   3 36.6635 1.29077  -2 
   6   2   3 36.6635 1.29077   1 
   6   2   3 1.08216 1.06993   2 
   6   2   3 0.32769 0.75360   1 
  -7   0   3 643.555 8.37462  -2 
   7   2   3 643.555 8.37462   1 
  -8   0   3 65.0108 1.73566  -2 
   8   2   3 65.0108 1.73566   1 
  -9   0   3 369.454 6.23066  -2 
   9   2   3 369.454 6.23066   1 
 -10   0   3 89.3906 3.02431  -2 
  10   2   3 89.3906 3.02431   1 
 -11   0   3 7.19202 2.42344  -2 
  11   2   3 7.19202 2.42344   1 
 -12   0   3 47.0089 3.38756  -2 
  12   2   3 47.0089 3.38756   1 
 -13   0   3 6.85349 3.28012  -2 
  13   2   3 6.85349 3.28012   1 
  12  -1   3 99.6749 6.00942  -2 
 -12   3   3 99.6749 6.00942   1 
  11  -1   3 19.0458 2.85632  -2 
 -11   3   3 19.0458 2.85632   1 
  10  -1   3 297.207 6.64965  -2 
 -10   3   3 297.207 6.64965   1 
   9  -1   3 139.972 3.57856  -2 
  -9   3   3 139.972 3.57856   1 
   8  -1   3 136.463 2.91387  -2 
  -8   3   3 136.463 2.91387   1 
   7  -1   3 108.277 2.17683  -2 
  -7   3   3 108.277 2.17683   1 
   6  -1   3 237.534 3.21994  -2 
  -6   3   3 237.534 3.21994   1 
  -5   3   3 1.79660 0.57142   2 
   5  -1   3 13.9095 0.83944  -2 
  -5   3   3 13.9095 0.83944   1 
  -5   3   3 0.00745 0.96734   1 
   4  -1   3 913.785 23.2794  -2 
  -4   3   3 913.785 23.2794   1 
  -4   3   3 356.168 5.10631   1 
  -4   3   3 363.373 5.09101   2 
  -3   3   3 692.840 9.64423   2 
   3  -1   3 1905.30 53.2042  -2 
  -3   3   3 1905.30 53.2042   1 
  -3   3   3 684.762 9.00929   1 
   2  -1   3 719.777 28.3753  -2 
  -2   3   3 719.777 28.3753   1 
  -2   3   3 593.083 8.26282   2 
  -2   3   3 587.217 8.11215   1 
  -1   3   3 188.155 2.70973   2 
  -1   3   3 194.012 2.82703   1 
   1  -1   3 963.717 24.3662  -2 
  -1   3   3 963.717 24.3662   1 
   0   3   3 798.131 10.4985   1 
   0   3   3 793.705 10.5279   2 
   0  -1   3 1888.80 50.7687  -2 
   0   3   3 1888.80 50.7687   1 
   1   3   3 156.079 2.00708   1 
   1   3   3 156.943 2.39679   2 
  -1  -1   3 377.350 14.9838  -2 
   1   3   3 377.350 14.9838   1 
   2   3   3 999.351 12.8916   1 
   2   3   3 1006.21 11.7819   2 
   3   3   3 93.8492 1.49697   2 
   3   3   3 97.3972 1.54942   1 
   4   3   3 77.3044 1.35732   2 
   4   3   3 78.7775 1.34330   1 
   5   3   3 393.276 5.54917   2 
   5   3   3 395.451 5.61054   1 
  -5  -1   3 429.881 12.7125  -2 
   5   3   3 429.881 12.7125   1 
  -6  -1   3 1007.21 13.5310  -2 
   6   3   3 1007.21 13.5310   1 
   6   3   3 654.368 19.6279   1 
   6   3   3 654.643 27.1480   2 
  -7  -1   3 197.039 3.23319  -2 
   7   3   3 197.039 3.23319   1 
  -8  -1   3 116.339 2.40364  -2 
   8   3   3 116.339 2.40364   1 
  -9  -1   3 88.8269 2.42640  -2 
   9   3   3 88.8269 2.42640   1 
 -10  -1   3 86.3314 2.97272  -2 
  10   3   3 86.3314 2.97272   1 
 -11  -1   3 70.0225 3.43651  -2 
  11   3   3 70.0225 3.43651   1 
 -12  -1   3 79.8621 4.45712  -2 
  12   3   3 79.8621 4.45712   1 
 -13  -1   3 43.6942 3.90310  -2 
  13   3   3 43.6942 3.90310   1 
  12  -2   3 4.86375 3.07940  -2 
 -12   4   3 4.86375 3.07940   1 
  11  -2   3 146.849 6.12894  -2 
 -11   4   3 146.849 6.12894   1 
  10  -2   3 125.943 5.38746  -2 
 -10   4   3 125.943 5.38746   1 
   9  -2   3 152.173 3.82234  -2 
  -9   4   3 152.173 3.82234   1 
   8  -2   3 90.1037 2.30305  -2 
  -8   4   3 90.1037 2.30305   1 
   7  -2   3 113.991 2.37284  -2 
  -7   4   3 113.991 2.37284   1 
   6  -2   3 116.038 2.11750  -2 
  -6   4   3 116.038 2.11750   1 
   5  -2   3 595.734 7.72162  -2 
  -5   4   3 595.734 7.72162   1 
  -5   4   3 194.402 8.52055   1 
  -5   4   3 192.283 8.78201   2 
  -4   4   3 620.359 9.11468   2 
  -4   4   3 615.997 10.3333   1 
   4  -2   3 729.279 12.8918  -2 
  -4   4   3 729.279 12.8918   1 
  -3   4   3 496.373 7.03723   1 
  -3   4   3 512.650 7.35787   2 
   3  -2   3 1100.64 25.0094  -2 
  -3   4   3 1100.64 25.0094   1 
  -2   4   3 410.213 5.26785   2 
  -2   4   3 401.187 6.77775   1 
   2  -2   3 521.335 9.86071  -2 
  -2   4   3 521.335 9.86071   1 
   1  -2   3 1062.30 20.2230  -2 
  -1   4   3 1062.30 20.2230   1 
  -1   4   3 269.982 4.41072   2 
  -1   4   3 270.418 4.90732   1 
   0   4   3 214.853 3.02082   1 
   0   4   3 211.520 3.16517   2 
   0  -2   3 330.509 7.92385  -2 
   0   4   3 330.509 7.92385   1 
   1   4   3 17.9194 0.45155   1 
   1   4   3 17.5730 0.46987   2 
  -1  -2   3 32.5529 1.98780  -2 
   1   4   3 32.5529 1.98780   1 
   2   4   3 556.264 7.27809   2 
   2   4   3 554.872 6.87989   1 
   3   4   3 1137.56 13.9355   2 
   3   4   3 1123.47 13.1772   1 
   4   4   3 308.815 4.15092   1 
   4   4   3 309.251 3.73823   2 
  -4  -2   3 489.971 20.0769  -2 
   4   4   3 489.971 20.0769   1 
   5   4   3 309.638 5.26376   1 
  -5  -2   3 363.713 7.39531  -2 
   5   4   3 363.713 7.39531   1 
   5   4   3 303.563 5.64637   2 
  -6  -2   3 49.7457 1.23949  -2 
   6   4   3 49.7457 1.23949   1 
   6   4   3 15.8446 2.88443   2 
  -7  -2   3 94.1233 1.91384  -2 
   7   4   3 94.1233 1.91384   1 
  -8  -2   3 243.931 3.94008  -2 
   8   4   3 243.931 3.94008   1 
  -9  -2   3 263.040 4.73093  -2 
   9   4   3 263.040 4.73093   1 
 -10  -2   3 120.440 3.33137  -2 
  10   4   3 120.440 3.33137   1 
 -11  -2   3 237.451 6.54099  -2 
  11   4   3 237.451 6.54099   1 
 -12  -2   3 82.7122 7.99928  -2 
  12   4   3 82.7122 7.99928   1 
 -13  -2   3 4.62745 2.80632  -2 
  13   4   3 4.62745 2.80632   1 
  12  -3   3 161.669 8.33158  -2 
 -12   5   3 161.669 8.33158   1 
  11  -3   3 48.0060 4.33443  -2 
 -11   5   3 48.0060 4.33443   1 
  10  -3   3 2.29755 2.96743  -2 
 -10   5   3 2.29755 2.96743   1 
   9  -3   3 11.0465 2.29877  -2 
  -9   5   3 11.0465 2.29877   1 
   8  -3   3 31.8037 1.73540  -2 
  -8   5   3 31.8037 1.73540   1 
   7  -3   3 8.50231 1.22413  -2 
  -7   5   3 8.50231 1.22413   1 
   6  -3   3 805.946 10.6507  -2 
  -6   5   3 805.946 10.6507   1 
   5  -3   3 110.236 1.84025  -2 
  -5   5   3 110.236 1.84025   1 
  -4   5   3 127.159 4.50658   2 
   4  -3   3 536.936 7.31053  -2 
  -4   5   3 536.936 7.31053   1 
  -4   5   3 130.746 4.43832   1 
  -3   5   3 248.289 4.83875   1 
  -3   5   3 261.906 4.44620   2 
   3  -3   3 790.261 11.7276  -2 
  -3   5   3 790.261 11.7276   1 
   2  -3   3 13.6260 0.68373  -2 
  -2   5   3 13.6260 0.68373   1 
  -2   5   3 9.24633 0.44795   2 
  -2   5   3 9.97041 0.57780   1 
   1  -3   3 189.136 3.11291  -2 
  -1   5   3 189.136 3.11291   1 
  -1   5   3 94.6378 2.16672   2 
  -1   5   3 97.3317 2.54612   1 
   0   5   3 75.1431 2.48099   1 
   0  -3   3 78.5943 1.42520  -2 
   0   5   3 78.5943 1.42520   1 
   0   5   3 74.1388 1.55998   2 
   1   5   3 459.610 6.59926   1 
  -1  -3   3 498.821 16.3666  -2 
   1   5   3 498.821 16.3666   1 
   1   5   3 436.043 8.09937   2 
  -2  -3   3 1379.75 38.6292  -2 
   2   5   3 1379.75 38.6292   1 
   2   5   3 730.818 9.48260   1 
   2   5   3 740.858 9.65506   2 
   3   5   3 470.897 6.28403   1 
  -3  -3   3 2399.07 66.9356  -2 
   3   5   3 2399.07 66.9356   1 
   3   5   3 474.427 6.00276   2 
   4   5   3 217.983 2.94624   2 
  -4  -3   3 267.643 11.3390  -2 
   4   5   3 267.643 11.3390   1 
   4   5   3 214.164 2.86914   1 
  -5  -3   3 0.19176 0.93938  -2 
   5   5   3 0.19176 0.93938   1 
   5   5   3 0.81791 0.47061   1 
   5   5   3 1.21703 0.41325   2 
  -6  -3   3 100.008 1.81289  -2 
   6   5   3 100.008 1.81289   1 
   6   5   3 41.1722 2.92161   2 
  -7  -3   3 28.1296 1.22443  -2 
   7   5   3 28.1296 1.22443   1 
  -8  -3   3 600.950 8.37696  -2 
   8   5   3 600.950 8.37696   1 
  -9  -3   3 304.227 5.28345  -2 
   9   5   3 304.227 5.28345   1 
 -10  -3   3 56.6740 2.25157  -2 
  10   5   3 56.6740 2.25157   1 
 -11  -3   3 79.5670 3.04736  -2 
  11   5   3 79.5670 3.04736   1 
 -12  -3   3 131.660 6.94584  -2 
  12   5   3 131.660 6.94584   1 
 -13  -3   3 32.0481 4.27614  -2 
  13   5   3 32.0481 4.27614   1 
  12  -4   3 5.12429 3.31221  -2 
 -12   6   3 5.12429 3.31221   1 
  11  -4   3 90.8752 5.85827  -2 
 -11   6   3 90.8752 5.85827   1 
  10  -4   3 1.43525 2.86824  -2 
 -10   6   3 1.43525 2.86824   1 
   9  -4   3 54.5285 3.16645  -2 
  -9   6   3 54.5285 3.16645   1 
   8  -4   3 37.9347 1.86079  -2 
  -8   6   3 37.9347 1.86079   1 
   7  -4   3 189.883 3.59711  -2 
  -7   6   3 189.883 3.59711   1 
   6  -4   3 23.4646 1.21904  -2 
  -6   6   3 23.4646 1.21904   1 
   5  -4   3 184.034 2.76305  -2 
  -5   6   3 184.034 2.76305   1 
  -5   6   3 24.1933 1.92914   1 
   4  -4   3 365.404 4.70427  -2 
  -4   6   3 365.404 4.70427   1 
  -4   6   3 208.979 9.35632   2 
   3  -4   3 33.7568 0.92205  -2 
  -3   6   3 33.7568 0.92205   1 
  -3   6   3 29.0867 2.38314   1 
   2  -4   3 40.4463 1.09432  -2 
  -2   6   3 40.4463 1.09432   1 
   1  -4   3 1102.08 14.7757  -2 
  -1   6   3 1102.08 14.7757   1 
  -1   6   3 510.309 12.5815   2 
  -1   6   3 534.918 20.4826   1 
   0  -4   3 266.087 3.81611  -2 
   0   6   3 266.087 3.81611   1 
   0   6   3 81.5313 2.07079   2 
   0   6   3 79.8154 2.91858   1 
   1   6   3 189.321 4.21161   1 
   1   6   3 182.534 4.49481   2 
  -1  -4   3 372.091 5.93682  -2 
   1   6   3 372.091 5.93682   1 
   2   6   3 806.288 11.6602   1 
  -2  -4   3 1259.86 25.5028  -2 
   2   6   3 1259.86 25.5028   1 
   2   6   3 819.228 12.0395   2 
   3   6   3 885.934 12.2745   2 
  -3  -4   3 1831.30 71.9163  -2 
   3   6   3 1831.30 71.9163   1 
   3   6   3 883.479 10.5074   1 
  -4  -4   3 157.334 3.51639  -2 
   4   6   3 157.334 3.51639   1 
   4   6   3 130.366 2.33448   1 
   4   6   3 133.114 2.62873   2 
  -5  -4   3 187.974 2.99746  -2 
   5   6   3 187.974 2.99746   1 
   5   6   3 143.084 3.50996   1 
   5   6   3 142.567 6.86147   2 
  -6  -4   3 270.093 3.66327  -2 
   6   6   3 270.093 3.66327   1 
   6   6   3 212.305 15.5928   1 
   6   6   3 207.075 9.45961   2 
  -7  -4   3 380.180 5.26119  -2 
   7   6   3 380.180 5.26119   1 
  -8  -4   3 485.093 6.94018  -2 
   8   6   3 485.093 6.94018   1 
  -9  -4   3 307.581 5.34186  -2 
   9   6   3 307.581 5.34186   1 
 -10  -4   3 45.4891 2.09048  -2 
  10   6   3 45.4891 2.09048   1 
 -11  -4   3 69.1161 2.91472  -2 
  11   6   3 69.1161 2.91472   1 
 -12  -4   3 71.9494 3.37208  -2 
  12   6   3 71.9494 3.37208   1 
 -13  -4   3 41.1550 4.42909  -2 
  13   6   3 41.1550 4.42909   1 
  12  -5   3 231.185 10.9295  -2 
 -12   7   3 231.185 10.9295   1 
  11  -5   3 79.4684 5.46508  -2 
 -11   7   3 79.4684 5.46508   1 
  10  -5   3 10.8426 2.89087  -2 
 -10   7   3 10.8426 2.89087   1 
   9  -5   3 112.187 4.96570  -2 
  -9   7   3 112.187 4.96570   1 
   8  -5   3 48.1085 2.93482  -2 
  -8   7   3 48.1085 2.93482   1 
   7  -5   3 63.3448 1.96587  -2 
  -7   7   3 63.3448 1.96587   1 
   6  -5   3 203.819 3.77020  -2 
  -6   7   3 203.819 3.77020   1 
  -6   7   3 168.841 7.80746   1 
   5  -5   3 248.506 3.58676  -2 
  -5   7   3 248.506 3.58676   1 
   4  -5   3 44.6501 1.12830  -2 
  -4   7   3 44.6501 1.12830   1 
   3  -5   3 207.896 2.86266  -2 
  -3   7   3 207.896 2.86266   1 
  -3   7   3 41.4801 3.04215   2 
   2  -5   3 863.877 10.3568  -2 
  -2   7   3 863.877 10.3568   1 
  -2   7   3 302.239 12.6981   2 
   1  -5   3 211.539 3.13678  -2 
  -1   7   3 211.539 3.13678   1 
  -1   7   3 133.273 4.44517   1 
  -1   7   3 134.550 9.21820   2 
   0  -5   3 27.7972 0.83682  -2 
   0   7   3 27.7972 0.83682   1 
   0   7   3 6.67339 0.97783   1 
   0   7   3 7.05874 0.77543   2 
   1   7   3 37.2031 3.46239   2 
   1   7   3 40.0585 1.65204   1 
  -1  -5   3 57.1302 1.19907  -2 
   1   7   3 57.1302 1.19907   1 
   2   7   3 517.898 9.08412   1 
  -2  -5   3 1582.50 23.7069  -2 
   2   7   3 1582.50 23.7069   1 
   2   7   3 505.599 15.7366   2 
  -3  -5   3 200.007 3.17686  -2 
   3   7   3 200.007 3.17686   1 
   3   7   3 11.7604 0.74697   2 
   3   7   3 11.3830 0.79087   1 
  -4  -5   3 185.540 2.99061  -2 
   4   7   3 185.540 2.99061   1 
   4   7   3 113.886 3.07676   1 
   4   7   3 117.480 3.59069   2 
   5   7   3 12.8655 1.56240   1 
  -5  -5   3 48.7352 1.16743  -2 
   5   7   3 48.7352 1.16743   1 
   5   7   3 13.4554 2.43405   2 
  -6  -5   3 37.3362 1.09094  -2 
   6   7   3 37.3362 1.09094   1 
  -7  -5   3 70.6196 1.68265  -2 
   7   7   3 70.6196 1.68265   1 
  -8  -5   3 1012.67 14.2542  -2 
   8   7   3 1012.67 14.2542   1 
  -9  -5   3 18.2364 1.66411  -2 
   9   7   3 18.2364 1.66411   1 
 -10  -5   3 36.7949 1.98518  -2 
  10   7   3 36.7949 1.98518   1 
 -11  -5   3 14.7408 1.96558  -2 
  11   7   3 14.7408 1.96558   1 
 -12  -5   3 97.4865 3.25535  -2 
  12   7   3 97.4865 3.25535   1 
 -13  -5   3 39.6538 3.86895  -2 
  13   7   3 39.6538 3.86895   1 
  11  -6   3 74.3741 5.35647  -2 
 -11   8   3 74.3741 5.35647   1 
  10  -6   3 17.5653 3.63772  -2 
 -10   8   3 17.5653 3.63772   1 
   9  -6   3 18.3696 2.92519  -2 
  -9   8   3 18.3696 2.92519   1 
   8  -6   3 17.3549 2.69101  -2 
  -8   8   3 17.3549 2.69101   1 
   7  -6   3 57.7481 2.09524  -2 
  -7   8   3 57.7481 2.09524   1 
   6  -6   3 192.259 3.60323  -2 
  -6   8   3 192.259 3.60323   1 
   5  -6   3 11.0445 1.03814  -2 
  -5   8   3 11.0445 1.03814   1 
   4  -6   3 170.929 2.58168  -2 
  -4   8   3 170.929 2.58168   1 
   3  -6   3 192.433 2.73035  -2 
  -3   8   3 192.433 2.73035   1 
  -3   8   3 156.023 7.36476   1 
   2  -6   3 43.0473 1.03240  -2 
  -2   8   3 43.0473 1.03240   1 
  -2   8   3 21.7797 1.37655   2 
   1  -6   3 28.7591 0.84945  -2 
  -1   8   3 28.7591 0.84945   1 
  -1   8   3 19.7099 2.00021   1 
  -1   8   3 22.5744 2.24172   2 
   0  -6   3 62.1872 1.23487  -2 
   0   8   3 62.1872 1.23487   1 
   0   8   3 31.4710 1.60265   2 
   0   8   3 25.4594 3.29089   1 
  -1  -6   3 232.128 3.13125  -2 
   1   8   3 232.128 3.13125   1 
   1   8   3 215.028 6.10519   2 
   1   8   3 223.051 9.36149   1 
   2   8   3 31.2648 1.52213   1 
   2   8   3 26.3113 2.19013   2 
  -2  -6   3 45.8127 1.08042  -2 
   2   8   3 45.8127 1.08042   1 
  -3  -6   3 389.444 5.13996  -2 
   3   8   3 389.444 5.13996   1 
   3   8   3 325.539 11.1011   2 
   3   8   3 327.228 9.89211   1 
  -4  -6   3 217.668 3.10152  -2 
   4   8   3 217.668 3.10152   1 
   4   8   3 119.143 3.71364   1 
   4   8   3 119.789 4.49187   2 
  -5  -6   3 68.6947 1.38785  -2 
   5   8   3 68.6947 1.38785   1 
   5   8   3 9.71019 2.15793   1 
   5   8   3 7.56400 1.31668   2 
  -6  -6   3 82.1584 1.56535  -2 
   6   8   3 82.1584 1.56535   1 
  -7  -6   3 178.368 2.78570  -2 
   7   8   3 178.368 2.78570   1 
  -8  -6   3 166.488 3.19559  -2 
   8   8   3 166.488 3.19559   1 
  -9  -6   3 30.2832 1.76418  -2 
   9   8   3 30.2832 1.76418   1 
 -10  -6   3 30.3834 1.89462  -2 
  10   8   3 30.3834 1.89462   1 
 -11  -6   3 84.1213 2.89336  -2 
  11   8   3 84.1213 2.89336   1 
 -12  -6   3 65.4601 2.82792  -2 
  12   8   3 65.4601 2.82792   1 
 -13  -6   3 34.6719 2.94207  -2 
  13   8   3 34.6719 2.94207   1 
  11  -7   3 89.1434 5.88793  -2 
 -11   9   3 89.1434 5.88793   1 
  10  -7   3 7.28306 3.44896  -2 
 -10   9   3 7.28306 3.44896   1 
   9  -7   3 62.1621 4.07093  -2 
  -9   9   3 62.1621 4.07093   1 
   8  -7   3 6.12868 2.68946  -2 
  -8   9   3 6.12868 2.68946   1 
   7  -7   3 243.973 5.14518  -2 
  -7   9   3 243.973 5.14518   1 
   6  -7   3 16.3878 1.53190  -2 
  -6   9   3 16.3878 1.53190   1 
   5  -7   3 332.871 5.13076  -2 
  -5   9   3 332.871 5.13076   1 
   4  -7   3 41.5514 1.29163  -2 
  -4   9   3 41.5514 1.29163   1 
   3  -7   3 160.934 2.38700  -2 
  -3   9   3 160.934 2.38700   1 
   2  -7   3 169.588 2.40756  -2 
  -2   9   3 169.588 2.40756   1 
   1  -7   3 595.955 7.32488  -2 
  -1   9   3 595.955 7.32488   1 
   0  -7   3 283.189 3.77392  -2 
   0   9   3 283.189 3.77392   1 
   0   9   3 122.280 8.94366   1 
   0   9   3 112.861 5.49037   2 
  -1  -7   3 186.626 2.93027  -2 
   1   9   3 186.626 2.93027   1 
   1   9   3 161.351 4.32022   1 
   1   9   3 154.510 5.24843   2 
  -2  -7   3 138.838 2.20869  -2 
   2   9   3 138.838 2.20869   1 
   2   9   3 129.849 4.00466   1 
   2   9   3 133.885 3.74831   2 
  -3  -7   3 110.692 1.63740  -2 
   3   9   3 110.692 1.63740   1 
   3   9   3 78.4361 4.32920   2 
  -4  -7   3 4.44417 0.69677  -2 
   4   9   3 4.44417 0.69677   1 
  -5  -7   3 69.1206 1.37834  -2 
   5   9   3 69.1206 1.37834   1 
  -6  -7   3 196.785 2.79712  -2 
   6   9   3 196.785 2.79712   1 
  -7  -7   3 210.697 3.16117  -2 
   7   9   3 210.697 3.16117   1 
  -8  -7   3 113.493 2.46762  -2 
   8   9   3 113.493 2.46762   1 
  -9  -7   3 14.5507 1.56153  -2 
   9   9   3 14.5507 1.56153   1 
 -10  -7   3 51.3430 2.14667  -2 
  10   9   3 51.3430 2.14667   1 
 -11  -7   3 34.3762 2.18524  -2 
  11   9   3 34.3762 2.18524   1 
 -12  -7   3 113.447 3.53604  -2 
  12   9   3 113.447 3.53604   1 
 -13  -7   3 29.5778 2.90721  -2 
  13   9   3 29.5778 2.90721   1 
 -11  10   3 6.35819 3.93203   1 
 -11  10   3 3.62933 1.71501   2 
  10  -8   3 49.4076 4.70028  -2 
 -10  10   3 49.4076 4.70028   1 
   9  -8   3 2.94271 2.72768  -2 
  -9  10   3 2.94271 2.72768   1 
   8  -8   3 30.2665 3.24561  -2 
  -8  10   3 30.2665 3.24561   1 
   7  -8   3 77.7909 3.16876  -2 
  -7  10   3 77.7909 3.16876   1 
   6  -8   3 232.745 4.54188  -2 
  -6  10   3 232.745 4.54188   1 
   5  -8   3 91.9946 2.28490  -2 
  -5  10   3 91.9946 2.28490   1 
   4  -8   3 44.8312 1.51176  -2 
  -4  10   3 44.8312 1.51176   1 
   3  -8   3 620.248 7.93581  -2 
  -3  10   3 620.248 7.93581   1 
   2  -8   3 152.401 2.27348  -2 
  -2  10   3 152.401 2.27348   1 
   1  -8   3 60.0370 1.22360  -2 
  -1  10   3 60.0370 1.22360   1 
  -1  10   3 39.2555 2.69951   2 
   0  -8   3 411.003 4.89443  -2 
   0  10   3 411.003 4.89443   1 
   1  10   3 6.38616 0.88518   1 
   1  10   3 7.03586 1.68779   2 
  -1  -8   3 110.476 1.91661  -2 
   1  10   3 110.476 1.91661   1 
  -2  -8   3 103.256 1.75614  -2 
   2  10   3 103.256 1.75614   1 
   2  10   3 0.94680 0.87514   1 
   2  10   3 1.50258 0.87631   2 
  -3  -8   3 352.545 4.37544  -2 
   3  10   3 352.545 4.37544   1 
   3  10   3 305.223 13.7007   1 
  -4  -8   3 58.0175 1.36601  -2 
   4  10   3 58.0175 1.36601   1 
   4  10   3 50.6416 2.42996   1 
   4  10   3 43.8380 3.35603   2 
  -5  -8   3 286.528 3.70376  -2 
   5  10   3 286.528 3.70376   1 
  -6  -8   3 10.8518 0.97538  -2 
   6  10   3 10.8518 0.97538   1 
  -7  -8   3 209.835 3.31593  -2 
   7  10   3 209.835 3.31593   1 
  -8  -8   3 68.2326 2.07083  -2 
   8  10   3 68.2326 2.07083   1 
  -9  -8   3 43.9664 2.17627  -2 
   9  10   3 43.9664 2.17627   1 
 -10  -8   3 31.2181 1.93757  -2 
  10  10   3 31.2181 1.93757   1 
 -11  -8   3 157.600 4.03014  -2 
  11  10   3 157.600 4.03014   1 
 -12  -8   3 26.3218 2.45348  -2 
  12  10   3 26.3218 2.45348   1 
 -13  -8   3 64.6724 3.48226  -2 
  13  10   3 64.6724 3.48226   1 
  10  -9   3 24.1661 3.48147  -2 
 -10  11   3 24.1661 3.48147   1 
   9  -9   3 13.3053 3.26827  -2 
  -9  11   3 13.3053 3.26827   1 
   8  -9   3 -0.6553 2.93915  -2 
  -8  11   3 -0.6553 2.93915   1 
   7  -9   3 122.969 4.56658  -2 
  -7  11   3 122.969 4.56658   1 
   6  -9   3 441.655 8.12681  -2 
  -6  11   3 441.655 8.12681   1 
   5  -9   3 153.872 3.13792  -2 
  -5  11   3 153.872 3.13792   1 
   4  -9   3 139.496 2.85062  -2 
  -4  11   3 139.496 2.85062   1 
   3  -9   3 134.494 2.44239  -2 
  -3  11   3 134.494 2.44239   1 
   2  -9   3 210.618 3.15508  -2 
  -2  11   3 210.618 3.15508   1 
   1  -9   3 268.989 3.78155  -2 
  -1  11   3 268.989 3.78155   1 
   0  -9   3 1348.19 15.4498  -2 
   0  11   3 1348.19 15.4498   1 
   0  11   3 396.461 16.7959   2 
  -1  -9   3 519.856 6.54616  -2 
   1  11   3 519.856 6.54616   1 
   1  11   3 482.970 19.4353   1 
  -2  -9   3 649.284 8.82497  -2 
   2  11   3 649.284 8.82497   1 
   2  11   3 486.697 20.8377   2 
   2  11   3 515.993 12.6648   1 
  -3  -9   3 145.682 2.22541  -2 
   3  11   3 145.682 2.22541   1 
   3  11   3 38.5454 3.35933   1 
  -4  -9   3 268.506 3.49757  -2 
   4  11   3 268.506 3.49757   1 
  -5  -9   3 99.7940 1.76644  -2 
   5  11   3 99.7940 1.76644   1 
  -6  -9   3 198.538 3.00401  -2 
   6  11   3 198.538 3.00401   1 
  -7  -9   3 213.890 3.38367  -2 
   7  11   3 213.890 3.38367   1 
  -8  -9   3 394.763 6.03816  -2 
   8  11   3 394.763 6.03816   1 
  -9  -9   3 93.4518 2.72433  -2 
   9  11   3 93.4518 2.72433   1 
 -10  -9   3 29.2647 2.03327  -2 
  10  11   3 29.2647 2.03327   1 
 -11  -9   3 38.6374 2.33260  -2 
  11  11   3 38.6374 2.33260   1 
 -12  -9   3 4.12973 2.51112  -2 
  12  11   3 4.12973 2.51112   1 
 -13  -9   3 83.7898 4.23837  -2 
  13  11   3 83.7898 4.23837   1 
 -10  12   3 8.90559 1.99936   2 
 -10  12   3 10.8047 4.04798   1 
   9 -10   3 14.0056 3.27175  -2 
  -9  12   3 14.0056 3.27175   1 
   8 -10   3 27.5572 3.50822  -2 
  -8  12   3 27.5572 3.50822   1 
   7 -10   3 323.250 9.07340  -2 
  -7  12   3 323.250 9.07340   1 
   6 -10   3 354.471 8.30633  -2 
  -6  12   3 354.471 8.30633   1 
   5 -10   3 68.3689 2.21548  -2 
  -5  12   3 68.3689 2.21548   1 
   4 -10   3 54.3077 1.83749  -2 
  -4  12   3 54.3077 1.83749   1 
   3 -10   3 416.450 6.58866  -2 
  -3  12   3 416.450 6.58866   1 
   2 -10   3 38.5005 1.38228  -2 
  -2  12   3 38.5005 1.38228   1 
  -2  12   3 17.1228 2.25213   2 
   1 -10   3 668.466 8.96144  -2 
  -1  12   3 668.466 8.96144   1 
   0 -10   3 505.520 6.27821  -2 
   0  12   3 505.520 6.27821   1 
  -1 -10   3 1247.23 15.4180  -2 
   1  12   3 1247.23 15.4180   1 
   1  12   3 324.828 13.8322   1 
  -2 -10   3 84.3576 1.69142  -2 
   2  12   3 84.3576 1.69142   1 
   2  12   3 10.5863 2.30737   2 
   2  12   3 12.9841 2.28856   1 
  -3 -10   3 500.508 6.22931  -2 
   3  12   3 500.508 6.22931   1 
   3  12   3 193.843 9.68793   1 
  -4 -10   3 226.813 3.07815  -2 
   4  12   3 226.813 3.07815   1 
  -5 -10   3 68.3217 1.65051  -2 
   5  12   3 68.3217 1.65051   1 
   5  12   3 57.7976 3.63206   1 
  -6 -10   3 155.759 2.66571  -2 
   6  12   3 155.759 2.66571   1 
  -7 -10   3 855.258 12.5617  -2 
   7  12   3 855.258 12.5617   1 
  -8 -10   3 143.003 3.15911  -2 
   8  12   3 143.003 3.15911   1 
  -9 -10   3 182.514 3.99336  -2 
   9  12   3 182.514 3.99336   1 
 -10 -10   3 8.07345 2.08371  -2 
  10  12   3 8.07345 2.08371   1 
 -11 -10   3 70.2428 2.81385  -2 
  11  12   3 70.2428 2.81385   1 
 -12 -10   3 20.3012 2.32186  -2 
  12  12   3 20.3012 2.32186   1 
   9 -11   3 14.5973 3.31653  -2 
  -9  13   3 14.5973 3.31653   1 
   8 -11   3 1.52551 3.49007  -2 
  -8  13   3 1.52551 3.49007   1 
   7 -11   3 173.676 7.02534  -2 
  -7  13   3 173.676 7.02534   1 
   6 -11   3 184.409 5.19371  -2 
  -6  13   3 184.409 5.19371   1 
   5 -11   3 26.2351 1.88959  -2 
  -5  13   3 26.2351 1.88959   1 
   4 -11   3 48.8482 1.93166  -2 
  -4  13   3 48.8482 1.93166   1 
   3 -11   3 31.6606 1.60116  -2 
  -3  13   3 31.6606 1.60116   1 
   2 -11   3 5.91863 1.24749  -2 
  -2  13   3 5.91863 1.24749   1 
   1 -11   3 76.6582 2.16965  -2 
  -1  13   3 76.6582 2.16965   1 
   0 -11   3 1009.59 13.2081  -2 
   0  13   3 1009.59 13.2081   1 
  -1 -11   3 112.240 2.15982  -2 
   1  13   3 112.240 2.15982   1 
   1  13   3 101.163 5.85817   1 
  -2 -11   3 365.098 5.22350  -2 
   2  13   3 365.098 5.22350   1 
   2  13   3 335.714 15.0943   1 
  -3 -11   3 4.77051 0.94509  -2 
   3  13   3 4.77051 0.94509   1 
  -4 -11   3 149.411 2.50271  -2 
   4  13   3 149.411 2.50271   1 
  -5 -11   3 19.4518 1.46264  -2 
   5  13   3 19.4518 1.46264   1 
   5  13   3 15.7970 1.73265   1 
  -6 -11   3 196.124 3.67933  -2 
   6  13   3 196.124 3.67933   1 
   6  13   3 75.5631 5.42111   2 
  -7 -11   3 165.215 3.36678  -2 
   7  13   3 165.215 3.36678   1 
  -8 -11   3 623.814 9.58344  -2 
   8  13   3 623.814 9.58344   1 
  -9 -11   3 17.4035 1.68979  -2 
   9  13   3 17.4035 1.68979   1 
 -10 -11   3 21.9774 1.86885  -2 
  10  13   3 21.9774 1.86885   1 
  11  13   3 25.7534 2.73380   2 
 -11 -11   3 32.9975 2.45037  -2 
  11  13   3 32.9975 2.45037   1 
 -12 -11   3 17.2734 2.36533  -2 
  12  13   3 17.2734 2.36533   1 
  -9  14   3 6.92703 1.75817   2 
  -9  14   3 4.99976 1.70542   1 
   8 -12   3 36.6879 3.65547  -2 
  -8  14   3 36.6879 3.65547   1 
   7 -12   3 163.018 6.72480  -2 
  -7  14   3 163.018 6.72480   1 
   6 -12   3 96.6315 4.19021  -2 
  -6  14   3 96.6315 4.19021   1 
   5 -12   3 44.8825 2.21714  -2 
  -5  14   3 44.8825 2.21714   1 
   4 -12   3 181.226 3.82042  -2 
  -4  14   3 181.226 3.82042   1 
   3 -12   3 7.79693 1.49393  -2 
  -3  14   3 7.79693 1.49393   1 
   2 -12   3 26.5703 1.67004  -2 
  -2  14   3 26.5703 1.67004   1 
   1 -12   3 295.604 5.33955  -2 
  -1  14   3 295.604 5.33955   1 
   0 -12   3 84.5874 2.11817  -2 
   0  14   3 84.5874 2.11817   1 
  -1 -12   3 99.8218 2.29868  -2 
   1  14   3 99.8218 2.29868   1 
  -2 -12   3 92.8917 2.22231  -2 
   2  14   3 92.8917 2.22231   1 
  -3 -12   3 144.061 2.75506  -2 
   3  14   3 144.061 2.75506   1 
  -4 -12   3 76.1320 1.97278  -2 
   4  14   3 76.1320 1.97278   1 
  -5 -12   3 125.012 2.72375  -2 
   5  14   3 125.012 2.72375   1 
  -6 -12   3 99.4939 2.46864  -2 
   6  14   3 99.4939 2.46864   1 
   6  14   3 109.209 7.19185   2 
  -7 -12   3 175.239 3.55639  -2 
   7  14   3 175.239 3.55639   1 
  -8 -12   3 87.0729 2.50495  -2 
   8  14   3 87.0729 2.50495   1 
  -9 -12   3 13.7935 1.79404  -2 
   9  14   3 13.7935 1.79404   1 
 -10 -12   3 51.9241 2.30577  -2 
  10  14   3 51.9241 2.30577   1 
 -11 -12   3 10.2808 2.12396  -2 
  11  14   3 10.2808 2.12396   1 
 -12 -12   3 11.5597 2.79900  -2 
  12  14   3 11.5597 2.79900   1 
   8 -13   3 36.6906 3.81403  -2 
  -8  15   3 36.6906 3.81403   1 
   7 -13   3 109.723 5.48432  -2 
  -7  15   3 109.723 5.48432   1 
   6 -13   3 81.9084 4.00912  -2 
  -6  15   3 81.9084 4.00912   1 
   5 -13   3 5.05089 1.92483  -2 
  -5  15   3 5.05089 1.92483   1 
   4 -13   3 43.3469 2.10347  -2 
  -4  15   3 43.3469 2.10347   1 
   3 -13   3 28.9755 1.82541  -2 
  -3  15   3 28.9755 1.82541   1 
   2 -13   3 164.348 3.81388  -2 
  -2  15   3 164.348 3.81388   1 
   1 -13   3 62.1810 2.08530  -2 
  -1  15   3 62.1810 2.08530   1 
   0 -13   3 75.0493 2.22783  -2 
   0  15   3 75.0493 2.22783   1 
  -1 -13   3 4.35145 1.29561  -2 
   1  15   3 4.35145 1.29561   1 
  -2 -13   3 230.609 4.34403  -2 
   2  15   3 230.609 4.34403   1 
  -3 -13   3 6.15787 1.28754  -2 
   3  15   3 6.15787 1.28754   1 
  -4 -13   3 233.578 4.14972  -2 
   4  15   3 233.578 4.14972   1 
  -5 -13   3 11.2337 1.40218  -2 
   5  15   3 11.2337 1.40218   1 
  -6 -13   3 115.259 2.75360  -2 
   6  15   3 115.259 2.75360   1 
   6  15   3 35.3073 4.27816   2 
  -7 -13   3 82.9868 2.39999  -2 
   7  15   3 82.9868 2.39999   1 
  -8 -13   3 36.8839 1.91720  -2 
   8  15   3 36.8839 1.91720   1 
  -9 -13   3 22.9571 1.97693  -2 
   9  15   3 22.9571 1.97693   1 
 -10 -13   3 65.8250 2.53824  -2 
  10  15   3 65.8250 2.53824   1 
 -11 -13   3 7.95184 2.15638  -2 
  11  15   3 7.95184 2.15638   1 
  12  15   3 7.31022 2.36889   1 
   7 -14   3 224.049 8.58685  -2 
  -7  16   3 224.049 8.58685   1 
   6 -14   3 13.8182 3.40582  -2 
  -6  16   3 13.8182 3.40582   1 
   5 -14   3 24.2442 2.39610  -2 
  -5  16   3 24.2442 2.39610   1 
   4 -14   3 12.0568 1.98477  -2 
  -4  16   3 12.0568 1.98477   1 
   3 -14   3 22.0802 2.04575  -2 
  -3  16   3 22.0802 2.04575   1 
   2 -14   3 70.2551 2.59038  -2 
  -2  16   3 70.2551 2.59038   1 
   1 -14   3 215.222 4.27219  -2 
  -1  16   3 215.222 4.27219   1 
   0 -14   3 47.9553 1.94210  -2 
   0  16   3 47.9553 1.94210   1 
  -1 -14   3 19.0640 1.56662  -2 
   1  16   3 19.0640 1.56662   1 
  -2 -14   3 69.5381 2.07529  -2 
   2  16   3 69.5381 2.07529   1 
  -3 -14   3 28.5567 1.59497  -2 
   3  16   3 28.5567 1.59497   1 
  -4 -14   3 34.8560 1.66871  -2 
   4  16   3 34.8560 1.66871   1 
  -5 -14   3 57.8356 2.01351  -2 
   5  16   3 57.8356 2.01351   1 
  -6 -14   3 64.1896 2.12975  -2 
   6  16   3 64.1896 2.12975   1 
   6  16   3 57.7918 5.35854   2 
  -7 -14   3 1.62529 1.48913  -2 
   7  16   3 1.62529 1.48913   1 
   7  16   3 2.20787 2.54970   2 
  -8 -14   3 37.4877 2.09895  -2 
   8  16   3 37.4877 2.09895   1 
  -9 -14   3 18.1492 1.94328  -2 
   9  16   3 18.1492 1.94328   1 
 -10 -14   3 5.14528 1.78364  -2 
  10  16   3 5.14528 1.78364   1 
 -11 -14   3 2.19662 2.13679  -2 
  11  16   3 2.19662 2.13679   1 
   6 -15   3 110.265 4.82319  -2 
  -6  17   3 110.265 4.82319   1 
   5 -15   3 53.5478 3.16422  -2 
  -5  17   3 53.5478 3.16422   1 
   4 -15   3 40.9819 2.61853  -2 
  -4  17   3 40.9819 2.61853   1 
   3 -15   3 25.2795 2.22600  -2 
  -3  17   3 25.2795 2.22600   1 
   2 -15   3 40.0204 2.11407  -2 
  -2  17   3 40.0204 2.11407   1 
   1 -15   3 61.2374 2.29203  -2 
  -1  17   3 61.2374 2.29203   1 
   0 -15   3 103.366 2.80768  -2 
   0  17   3 103.366 2.80768   1 
  -1 -15   3 49.5410 2.04347  -2 
   1  17   3 49.5410 2.04347   1 
  -2 -15   3 180.656 3.57107  -2 
   2  17   3 180.656 3.57107   1 
  -3 -15   3 167.254 3.39228  -2 
   3  17   3 167.254 3.39228   1 
  -4 -15   3 85.5451 2.35174  -2 
   4  17   3 85.5451 2.35174   1 
  -5 -15   3 66.1956 2.14599  -2 
   5  17   3 66.1956 2.14599   1 
  -6 -15   3 19.8002 1.63335  -2 
   6  17   3 19.8002 1.63335   1 
  -7 -15   3 44.9309 2.16111  -2 
   7  17   3 44.9309 2.16111   1 
   7  17   3 2.88040 2.71431   2 
  -8 -15   3 93.1895 2.85399  -2 
   8  17   3 93.1895 2.85399   1 
  -9 -15   3 19.5230 1.94504  -2 
   9  17   3 19.5230 1.94504   1 
 -10 -15   3 25.3445 2.07970  -2 
  10  17   3 25.3445 2.07970   1 
  11  17   3 50.6003 3.16808   1 
  -6  18   3 6.80884 3.57422   1 
  -6  18   3 7.72889 4.34368   2 
   5 -16   3 24.7548 3.20848  -2 
  -5  18   3 24.7548 3.20848   1 
   4 -16   3 24.6488 2.80683  -2 
  -4  18   3 24.6488 2.80683   1 
   3 -16   3 12.4576 2.31124  -2 
  -3  18   3 12.4576 2.31124   1 
   2 -16   3 29.1105 2.36244  -2 
  -2  18   3 29.1105 2.36244   1 
   1 -16   3 211.007 4.41289  -2 
  -1  18   3 211.007 4.41289   1 
   0 -16   3 140.761 3.37679  -2 
   0  18   3 140.761 3.37679   1 
  -1 -16   3 54.0645 2.20263  -2 
   1  18   3 54.0645 2.20263   1 
  -2 -16   3 147.003 3.20261  -2 
   2  18   3 147.003 3.20261   1 
  -3 -16   3 110.694 2.76621  -2 
   3  18   3 110.694 2.76621   1 
  -4 -16   3 42.0842 1.90998  -2 
   4  18   3 42.0842 1.90998   1 
  -5 -16   3 92.5248 2.69056  -2 
   5  18   3 92.5248 2.69056   1 
  -6 -16   3 112.094 3.01551  -2 
   6  18   3 112.094 3.01551   1 
  -7 -16   3 94.9663 3.08113  -2 
   7  18   3 94.9663 3.08113   1 
   7  18   3 89.4175 4.93170   2 
  -8 -16   3 22.2348 2.17029  -2 
   8  18   3 22.2348 2.17029   1 
  -9 -16   3 65.9720 2.58605  -2 
   9  18   3 65.9720 2.58605   1 
 -10 -16   3 13.1550 2.32400  -2 
  10  18   3 13.1550 2.32400   1 
   4 -17   3 8.03130 2.97784  -2 
  -4  19   3 8.03130 2.97784   1 
   3 -17   3 18.9858 2.64797  -2 
  -3  19   3 18.9858 2.64797   1 
   2 -17   3 139.982 4.17383  -2 
  -2  19   3 139.982 4.17383   1 
   1 -17   3 112.505 3.63392  -2 
  -1  19   3 112.505 3.63392   1 
   0 -17   3 55.8282 2.72656  -2 
   0  19   3 55.8282 2.72656   1 
  -1 -17   3 32.3242 2.36912  -2 
   1  19   3 32.3242 2.36912   1 
  -2 -17   3 45.0298 2.16077  -2 
   2  19   3 45.0298 2.16077   1 
  -3 -17   3 29.4986 2.00983  -2 
   3  19   3 29.4986 2.00983   1 
  -4 -17   3 83.4413 2.65904  -2 
   4  19   3 83.4413 2.65904   1 
  -5 -17   3 159.786 4.01655  -2 
   5  19   3 159.786 4.01655   1 
  -6 -17   3 115.112 3.40152  -2 
   6  19   3 115.112 3.40152   1 
  -7 -17   3 83.6302 3.03835  -2 
   7  19   3 83.6302 3.03835   1 
  -8 -17   3 81.5647 2.81387  -2 
   8  19   3 81.5647 2.81387   1 
  -9 -17   3 17.4755 2.41247  -2 
   9  19   3 17.4755 2.41247   1 
   3 -18   3 114.568 4.82583  -2 
  -3  20   3 114.568 4.82583   1 
   2 -18   3 60.8355 3.35753  -2 
  -2  20   3 60.8355 3.35753   1 
   1 -18   3 146.954 4.75931  -2 
  -1  20   3 146.954 4.75931   1 
   0 -18   3 25.4768 2.39575  -2 
   0  20   3 25.4768 2.39575   1 
  -1 -18   3 2.46002 2.04960  -2 
   1  20   3 2.46002 2.04960   1 
  -2 -18   3 5.50173 1.92296  -2 
   2  20   3 5.50173 1.92296   1 
  -3 -18   3 38.5654 2.39030  -2 
   3  20   3 38.5654 2.39030   1 
  -4 -18   3 70.8482 2.80949  -2 
   4  20   3 70.8482 2.80949   1 
  -5 -18   3 160.534 4.15789  -2 
   5  20   3 160.534 4.15789   1 
  -6 -18   3 109.670 3.42306  -2 
   6  20   3 109.670 3.42306   1 
  -7 -18   3 139.865 3.92673  -2 
   7  20   3 139.865 3.92673   1 
  -8 -18   3 2.74197 2.23497  -2 
   8  20   3 2.74197 2.23497   1 
  -2  21   3 42.3864 3.14286   2 
  -2  21   3 50.9633 2.99835   1 
   1 -19   3 38.6839 3.37826  -2 
  -1  21   3 38.6839 3.37826   1 
   0 -19   3 9.41129 2.51181  -2 
   0  21   3 9.41129 2.51181   1 
  -1 -19   3 -6.9676 2.09043  -2 
   1  21   3 -6.9676 2.09043   1 
  -2 -19   3 41.3042 2.52407  -2 
   2  21   3 41.3042 2.52407   1 
  -3 -19   3 44.4937 2.56326  -2 
   3  21   3 44.4937 2.56326   1 
  -4 -19   3 61.9740 2.77835  -2 
   4  21   3 61.9740 2.77835   1 
  -5 -19   3 69.7995 3.08344  -2 
   5  21   3 69.7995 3.08344   1 
  -6 -19   3 63.8939 3.80992  -2 
   6  21   3 63.8939 3.80992   1 
   7  21   3 1.05962 0.97848   1 
   7  21   3 1.85532 2.89793   2 
   1  22   3 1.88646 1.41587   1 
   1  22   3 7.27598 1.74219   2 
   2  22   3 23.9488 2.00608   1 
   2  22   3 16.5662 1.99872   2 
   3  22   3 7.83757 1.61672   2 
   3  22   3 9.70923 1.48596   1 
   4  22   3 14.7899 1.45905   1 
   4  22   3 11.1278 1.79627   2 
   5  22   3 12.6517 1.56037   1 
   5  22   3 14.9030 1.84794   2 
   5  22   4 8.09035 4.78625  -2 
  -5 -19   4 8.09035 4.78625   1 
   4  22   4 41.7407 6.22359  -2 
  -4 -19   4 41.7407 6.22359   1 
   3  22   4 109.613 8.78687  -2 
  -3 -19   4 109.613 8.78687   1 
   2  22   4 37.9165 6.35535  -2 
  -2 -19   4 37.9165 6.35535   1 
   1  22   4 8.24161 4.90637  -2 
  -1 -19   4 8.24161 4.90637   1 
   0  22   4 20.1522 5.47217  -2 
   0 -19   4 20.1522 5.47217   1 
   7  21   4 10.9862 4.62975  -2 
  -7 -18   4 10.9862 4.62975   1 
   6  21   4 10.4719 3.35367  -2 
  -6 -18   4 10.4719 3.35367   1 
   5  21   4 21.1362 2.99468  -2 
  -5 -18   4 21.1362 2.99468   1 
   4  21   4 25.9994 3.08520  -2 
  -4 -18   4 25.9994 3.08520   1 
   3  21   4 65.9772 3.87183  -2 
  -3 -18   4 65.9772 3.87183   1 
   2  21   4 28.3498 3.14247  -2 
  -2 -18   4 28.3498 3.14247   1 
   1  21   4 58.3833 2.75376  -2 
  -1 -18   4 58.3833 2.75376   1 
   0  21   4 39.6767 2.38572  -2 
   0 -18   4 39.6767 2.38572   1 
  -1  21   4 -3.5920 2.16830  -2 
   1 -18   4 -3.5920 2.16830   1 
  -2  21   4 3.63687 5.04089  -2 
   2 -18   4 3.63687 5.04089   1 
   8  20   4 1.15267 4.36712  -2 
  -8 -17   4 1.15267 4.36712   1 
   7  20   4 24.6931 3.02660  -2 
  -7 -17   4 24.6931 3.02660   1 
   6  20   4 54.1766 3.15445  -2 
  -6 -17   4 54.1766 3.15445   1 
   5  20   4 26.5734 2.58298  -2 
  -5 -17   4 26.5734 2.58298   1 
   4  20   4 19.0376 2.38152  -2 
  -4 -17   4 19.0376 2.38152   1 
   3  20   4 115.509 3.44820  -2 
  -3 -17   4 115.509 3.44820   1 
   2  20   4 28.3660 1.94956  -2 
  -2 -17   4 28.3660 1.94956   1 
   1  20   4 32.4359 2.09238  -2 
  -1 -17   4 32.4359 2.09238   1 
   0  20   4 25.4641 2.37110  -2 
   0 -17   4 25.4641 2.37110   1 
  -1  20   4 43.2356 2.79083  -2 
   1 -17   4 43.2356 2.79083   1 
  -2  20   4 32.3314 2.43890  -2 
   2 -17   4 32.3314 2.43890   1 
  -3  20   4 89.5623 4.60778  -2 
   3 -17   4 89.5623 4.60778   1 
   9  19   4 2.39477 4.41539  -2 
  -9 -16   4 2.39477 4.41539   1 
   8  19   4 28.8711 3.13628  -2 
  -8 -16   4 28.8711 3.13628   1 
   7  19   4 43.4858 2.90853  -2 
  -7 -16   4 43.4858 2.90853   1 
   6  19   4 26.9687 2.55980  -2 
  -6 -16   4 26.9687 2.55980   1 
   5  19   4 12.9583 1.59715  -2 
  -5 -16   4 12.9583 1.59715   1 
   4  19   4 23.1529 1.65154  -2 
  -4 -16   4 23.1529 1.65154   1 
   3  19   4 9.00682 1.45122  -2 
  -3 -16   4 9.00682 1.45122   1 
   2  19   4 48.8814 2.05125  -2 
  -2 -16   4 48.8814 2.05125   1 
   1  19   4 111.687 3.04524  -2 
  -1 -16   4 111.687 3.04524   1 
   0  19   4 96.4841 3.43026  -2 
   0 -16   4 96.4841 3.43026   1 
  -1  19   4 21.3690 2.10198  -2 
   1 -16   4 21.3690 2.10198   1 
  -2  19   4 30.7626 2.29957  -2 
   2 -16   4 30.7626 2.29957   1 
  -3  19   4 8.35145 1.99633  -2 
   3 -16   4 8.35145 1.99633   1 
  -4  19   4 33.6190 2.53225  -2 
   4 -16   4 33.6190 2.53225   1 
  -5  19   4 80.9206 4.51279  -2 
   5 -16   4 80.9206 4.51279   1 
  10  18   4 28.8108 5.58150  -2 
 -10 -15   4 28.8108 5.58150   1 
   9  18   4 59.6846 3.80402  -2 
  -9 -15   4 59.6846 3.80402   1 
   8  18   4 19.3897 2.49150  -2 
  -8 -15   4 19.3897 2.49150   1 
   7  18   4 30.5577 2.55558  -2 
  -7 -15   4 30.5577 2.55558   1 
   6  18   4 14.3924 1.59968  -2 
  -6 -15   4 14.3924 1.59968   1 
   5  18   4 59.4748 2.15628  -2 
  -5 -15   4 59.4748 2.15628   1 
   4  18   4 12.9050 1.39304  -2 
  -4 -15   4 12.9050 1.39304   1 
   3  18   4 117.492 3.03256  -2 
  -3 -15   4 117.492 3.03256   1 
   2  18   4 106.124 2.87712  -2 
  -2 -15   4 106.124 2.87712   1 
   1  18   4 56.9391 2.14702  -2 
  -1 -15   4 56.9391 2.14702   1 
   0  18   4 106.101 3.51531  -2 
   0 -15   4 106.101 3.51531   1 
  -1  18   4 117.059 3.42354  -2 
   1 -15   4 117.059 3.42354   1 
  -2  18   4 37.9797 2.12892  -2 
   2 -15   4 37.9797 2.12892   1 
  -3  18   4 35.5100 2.22082  -2 
   3 -15   4 35.5100 2.22082   1 
  -4  18   4 117.441 4.01103  -2 
   4 -15   4 117.441 4.01103   1 
  -5  18   4 30.4531 2.54566  -2 
   5 -15   4 30.4531 2.54566   1 
  -6  18   4 31.3607 3.31713  -2 
   6 -15   4 31.3607 3.31713   1 
  10  17   4 38.1040 3.40745  -2 
 -10 -14   4 38.1040 3.40745   1 
   9  17   4 63.6697 3.38604  -2 
  -9 -14   4 63.6697 3.38604   1 
   8  17   4 136.534 4.59092  -2 
  -8 -14   4 136.534 4.59092   1 
   7  17   4 24.0579 1.63040  -2 
  -7 -14   4 24.0579 1.63040   1 
   6  17   4 91.5293 2.63739  -2 
  -6 -14   4 91.5293 2.63739   1 
   5  17   4 42.7778 1.82373  -2 
  -5 -14   4 42.7778 1.82373   1 
   4  17   4 52.1108 1.81720  -2 
  -4 -14   4 52.1108 1.81720   1 
   3  17   4 113.680 2.57428  -2 
  -3 -14   4 113.680 2.57428   1 
   2  17   4 76.2809 2.05833  -2 
  -2 -14   4 76.2809 2.05833   1 
   1  17   4 148.381 3.74047  -2 
  -1 -14   4 148.381 3.74047   1 
   0  17   4 160.240 4.01966  -2 
   0 -14   4 160.240 4.01966   1 
  -1  17   4 30.9660 1.71735  -2 
   1 -14   4 30.9660 1.71735   1 
  -2  17   4 60.0988 2.43017  -2 
   2 -14   4 60.0988 2.43017   1 
  -3  17   4 5.14985 1.64936  -2 
   3 -14   4 5.14985 1.64936   1 
  -4  17   4 8.47374 1.83780  -2 
   4 -14   4 8.47374 1.83780   1 
  -5  17   4 143.115 4.52961  -2 
   5 -14   4 143.115 4.52961   1 
  -6  17   4 172.090 5.22778  -2 
   6 -14   4 172.090 5.22778   1 
  11  16   4 37.6003 6.11708  -2 
 -11 -13   4 37.6003 6.11708   1 
  10  16   4 203.781 6.12615  -2 
 -10 -13   4 203.781 6.12615   1 
   9  16   4 242.415 6.71732  -2 
  -9 -13   4 242.415 6.71732   1 
   8  16   4 6.84387 1.46833  -2 
  -8 -13   4 6.84387 1.46833   1 
   7  16   4 99.0403 2.78159  -2 
  -7 -13   4 99.0403 2.78159   1 
   6  16   4 2.09693 1.16903  -2 
  -6 -13   4 2.09693 1.16903   1 
   5  16   4 94.0956 2.29479  -2 
  -5 -13   4 94.0956 2.29479   1 
   4  16   4 226.319 3.83158  -2 
  -4 -13   4 226.319 3.83158   1 
   3  16   4 307.242 4.84205  -2 
  -3 -13   4 307.242 4.84205   1 
   2  16   4 149.499 2.82091  -2 
  -2 -13   4 149.499 2.82091   1 
   1  16   4 84.9335 2.28290  -2 
  -1 -13   4 84.9335 2.28290   1 
   0  16   4 9.11173 1.18105  -2 
   0 -13   4 9.11173 1.18105   1 
  -1  16   4 45.5469 1.67208  -2 
   1 -13   4 45.5469 1.67208   1 
  -2  16   4 109.482 2.69207  -2 
   2 -13   4 109.482 2.69207   1 
  -3  16   4 69.2706 2.34388  -2 
   3 -13   4 69.2706 2.34388   1 
  -4  16   4 71.3994 2.73664  -2 
   4 -13   4 71.3994 2.73664   1 
  -5  16   4 82.0853 3.03353  -2 
   5 -13   4 82.0853 3.03353   1 
  -6  16   4 78.8808 3.35804  -2 
   6 -13   4 78.8808 3.35804   1 
  -7  16   4 1.46731 2.18500  -2 
   7 -13   4 1.46731 2.18500   1 
  11  15   4 81.5581 4.49857  -2 
 -11 -12   4 81.5581 4.49857   1 
  10  15   4 70.6342 3.47866  -2 
 -10 -12   4 70.6342 3.47866   1 
   9  15   4 20.2977 2.35138  -2 
  -9 -12   4 20.2977 2.35138   1 
   8  15   4 8.29450 1.35156  -2 
  -8 -12   4 8.29450 1.35156   1 
   7  15   4 29.7919 1.57917  -2 
  -7 -12   4 29.7919 1.57917   1 
   6  15   4 10.3639 1.16138  -2 
  -6 -12   4 10.3639 1.16138   1 
   5  15   4 120.812 2.47150  -2 
  -5 -12   4 120.812 2.47150   1 
   4  15   4 358.800 5.48364  -2 
  -4 -12   4 358.800 5.48364   1 
   3  15   4 85.9627 1.96738  -2 
  -3 -12   4 85.9627 1.96738   1 
   2  15   4 130.155 2.48316  -2 
  -2 -12   4 130.155 2.48316   1 
   1  15   4 70.2101 1.97368  -2 
  -1 -12   4 70.2101 1.97368   1 
   0  15   4 34.3276 1.40175  -2 
   0 -12   4 34.3276 1.40175   1 
  -1  15   4 207.879 3.76829  -2 
   1 -12   4 207.879 3.76829   1 
  -2  15   4 590.591 9.10079  -2 
   2 -12   4 590.591 9.10079   1 
  -3  15   4 202.920 4.01892  -2 
   3 -12   4 202.920 4.01892   1 
  -4  15   4 0.78852 1.29493  -2 
   4 -12   4 0.78852 1.29493   1 
  -5  15   4 124.399 3.65999  -2 
   5 -12   4 124.399 3.65999   1 
  -6  15   4 147.129 4.19482  -2 
   6 -12   4 147.129 4.19482   1 
  -7  15   4 4.88068 2.19436  -2 
   7 -12   4 4.88068 2.19436   1 
  -8  15   4 170.059 7.01965  -2 
   8 -12   4 170.059 7.01965   1 
  12  14   4 5.78059 4.98001  -2 
 -12 -11   4 5.78059 4.98001   1 
  11  14   4 42.9729 3.57949  -2 
 -11 -11   4 42.9729 3.57949   1 
  10  14   4 16.9372 2.37981  -2 
 -10 -11   4 16.9372 2.37981   1 
   9  14   4 54.3638 2.11483  -2 
  -9 -11   4 54.3638 2.11483   1 
   8  14   4 -0.9905 1.18520  -2 
  -8 -11   4 -0.9905 1.18520   1 
   7  14   4 178.238 3.47534  -2 
  -7 -11   4 178.238 3.47534   1 
   6  14   4 7.06407 1.04201  -2 
  -6 -11   4 7.06407 1.04201   1 
   5  14   4 196.837 3.38489  -2 
  -5 -11   4 196.837 3.38489   1 
   4  14   4 129.933 2.34438  -2 
  -4 -11   4 129.933 2.34438   1 
   3  14   4 399.731 5.61701  -2 
  -3 -11   4 399.731 5.61701   1 
   2  14   4 89.7196 1.81725  -2 
  -2 -11   4 89.7196 1.81725   1 
   1  14   4 121.615 2.32705  -2 
  -1 -11   4 121.615 2.32705   1 
   0  14   4 39.3149 1.31819  -2 
   0 -11   4 39.3149 1.31819   1 
  -1  14   4 283.633 4.73597  -2 
   1 -11   4 283.633 4.73597   1 
  -2  14   4 235.683 4.13929  -2 
   2 -11   4 235.683 4.13929   1 
  -3  14   4 166.152 3.27640  -2 
   3 -11   4 166.152 3.27640   1 
  -4  14   4 151.526 3.31460  -2 
   4 -11   4 151.526 3.31460   1 
  -5  14   4 106.991 2.76274  -2 
   5 -11   4 106.991 2.76274   1 
  -6  14   4 -0.0737 1.67042  -2 
   6 -11   4 -0.0737 1.67042   1 
  -7  14   4 59.4640 2.98409  -2 
   7 -11   4 59.4640 2.98409   1 
  -8  14   4 23.6699 2.51887  -2 
   8 -11   4 23.6699 2.51887   1 
  -9  14   4 39.9792 3.63592  -2 
   9 -11   4 39.9792 3.63592   1 
  12  13   4 15.6556 3.74150  -2 
 -12 -10   4 15.6556 3.74150   1 
  11  13   4 4.75017 2.62908  -2 
 -11 -10   4 4.75017 2.62908   1 
  10  13   4 10.2334 2.19572  -2 
 -10 -10   4 10.2334 2.19572   1 
   9  13   4 6.23448 1.32116  -2 
  -9 -10   4 6.23448 1.32116   1 
   8  13   4 27.5964 1.44759  -2 
  -8 -10   4 27.5964 1.44759   1 
   7  13   4 10.0730 1.12318  -2 
  -7 -10   4 10.0730 1.12318   1 
   6  13   4 49.7853 1.50413  -2 
  -6 -10   4 49.7853 1.50413   1 
   5  13   4 5.65201 0.87292  -2 
  -5 -10   4 5.65201 0.87292   1 
   4  13   4 83.7447 1.73245  -2 
  -4 -10   4 83.7447 1.73245   1 
   3  13   4 99.8882 1.90111  -2 
  -3 -10   4 99.8882 1.90111   1 
   2  13   4 51.3099 1.36298  -2 
  -2 -10   4 51.3099 1.36298   1 
   1  13   4 211.285 3.42704  -2 
  -1 -10   4 211.285 3.42704   1 
   0  13   4 68.9431 1.61609  -2 
   0 -10   4 68.9431 1.61609   1 
  -1  13   4 115.012 2.23003  -2 
   1 -10   4 115.012 2.23003   1 
  -2  13   4 371.103 5.59056  -2 
   2 -10   4 371.103 5.59056   1 
  -3  13   4 123.644 2.62168  -2 
   3 -10   4 123.644 2.62168   1 
  -4  13   4 -1.5868 1.12895  -2 
   4 -10   4 -1.5868 1.12895   1 
  -5  13   4 55.4133 1.97500  -2 
   5 -10   4 55.4133 1.97500   1 
  -6  13   4 177.747 3.83727  -2 
   6 -10   4 177.747 3.83727   1 
  -7  13   4 17.7540 2.04130  -2 
   7 -10   4 17.7540 2.04130   1 
  -8  13   4 184.789 5.42939  -2 
   8 -10   4 184.789 5.42939   1 
  -9  13   4 125.052 5.01978  -2 
   9 -10   4 125.052 5.01978   1 
  12  12   4 26.2245 3.31818  -2 
 -12  -9   4 26.2245 3.31818   1 
  11  12   4 32.5412 3.16705  -2 
 -11  -9   4 32.5412 3.16705   1 
  10  12   4 12.8566 2.55040  -2 
 -10  -9   4 12.8566 2.55040   1 
   9  12   4 140.927 3.27965  -2 
  -9  -9   4 140.927 3.27965   1 
   8  12   4 50.5160 1.74282  -2 
  -8  -9   4 50.5160 1.74282   1 
   7  12   4 43.6340 1.48994  -2 
  -7  -9   4 43.6340 1.48994   1 
   6  12   4 6.60714 0.88021  -2 
  -6  -9   4 6.60714 0.88021   1 
   5  12   4 70.3957 1.59043  -2 
  -5  -9   4 70.3957 1.59043   1 
   4  12   4 74.9713 1.58124  -2 
  -4  -9   4 74.9713 1.58124   1 
   3  12   4 217.798 3.20039  -2 
  -3  -9   4 217.798 3.20039   1 
   2  12   4 301.853 4.10752  -2 
  -2  -9   4 301.853 4.10752   1 
   1  12   4 128.000 2.08083  -2 
  -1  -9   4 128.000 2.08083   1 
   0  12   4 85.2929 1.59492  -2 
   0  -9   4 85.2929 1.59492   1 
  -1  12   4 114.594 2.15674  -2 
   1  -9   4 114.594 2.15674   1 
  -2  12   4 21.5363 1.07449  -2 
   2  -9   4 21.5363 1.07449   1 
  -3  12   4 232.931 3.80830  -2 
   3  -9   4 232.931 3.80830   1 
  -4  12   4 137.993 2.82015  -2 
   4  -9   4 137.993 2.82015   1 
  -5  12   4 74.0411 2.06089  -2 
   5  -9   4 74.0411 2.06089   1 
  -6  12   4 5.55338 1.38164  -2 
   6  -9   4 5.55338 1.38164   1 
  -7  12   4 17.4274 1.78248  -2 
   7  -9   4 17.4274 1.78248   1 
  -8  12   4 5.30860 1.92199  -2 
   8  -9   4 5.30860 1.92199   1 
  -9  12   4 59.4467 3.12070  -2 
   9  -9   4 59.4467 3.12070   1 
 -10  12   4 226.099 8.62212  -2 
  10  -9   4 226.099 8.62212   1 
  13  11   4 25.7648 6.10097  -2 
 -13  -8   4 25.7648 6.10097   1 
  12  11   4 80.3196 4.52369  -2 
 -12  -8   4 80.3196 4.52369   1 
  11  11   4 27.6059 3.06612  -2 
 -11  -8   4 27.6059 3.06612   1 
  10  11   4 61.9268 2.42674  -2 
 -10  -8   4 61.9268 2.42674   1 
   9  11   4 135.398 3.18395  -2 
  -9  -8   4 135.398 3.18395   1 
   8  11   4 310.957 4.96857  -2 
  -8  -8   4 310.957 4.96857   1 
   7  11   4 54.4829 1.49113  -2 
  -7  -8   4 54.4829 1.49113   1 
   6  11   4 268.513 4.02456  -2 
  -6  -8   4 268.513 4.02456   1 
   5  11   4 218.231 3.33064  -2 
  -5  -8   4 218.231 3.33064   1 
   4  11   4 67.1940 1.23635  -2 
  -4  -8   4 67.1940 1.23635   1 
   3  11   4 300.269 3.64843  -2 
  -3  -8   4 300.269 3.64843   1 
   2  11   4 175.763 2.39323  -2 
  -2  -8   4 175.763 2.39323   1 
   1  11   4 149.812 2.14623  -2 
  -1  -8   4 149.812 2.14623   1 
   0  11   4 113.831 1.75134  -2 
   0  -8   4 113.831 1.75134   1 
  -1  11   4 263.621 3.63659  -2 
   1  -8   4 263.621 3.63659   1 
  -2  11   4 506.954 6.55855  -2 
   2  -8   4 506.954 6.55855   1 
  -3  11   4 310.968 4.75012  -2 
   3  -8   4 310.968 4.75012   1 
  -4  11   4 64.3594 1.67889  -2 
   4  -8   4 64.3594 1.67889   1 
  -5  11   4 115.548 2.54250  -2 
   5  -8   4 115.548 2.54250   1 
  -6  11   4 13.9650 1.41060  -2 
   6  -8   4 13.9650 1.41060   1 
  -7  11   4 39.8473 1.90797  -2 
   7  -8   4 39.8473 1.90797   1 
  -8  11   4 129.857 3.87879  -2 
   8  -8   4 129.857 3.87879   1 
  -9  11   4 68.2782 3.27046  -2 
   9  -8   4 68.2782 3.27046   1 
 -10  11   4 25.5524 2.72246  -2 
  10  -8   4 25.5524 2.72246   1 
  13  10   4 120.792 9.75041  -2 
 -13  -7   4 120.792 9.75041   1 
  12  10   4 93.8820 4.82058  -2 
 -12  -7   4 93.8820 4.82058   1 
  11  10   4 16.3396 2.72445  -2 
 -11  -7   4 16.3396 2.72445   1 
  10  10   4 199.376 4.54704  -2 
 -10  -7   4 199.376 4.54704   1 
   9  10   4 625.134 10.4442  -2 
  -9  -7   4 625.134 10.4442   1 
   8  10   4 177.555 3.23342  -2 
  -8  -7   4 177.555 3.23342   1 
   7  10   4 45.3739 1.34678  -2 
  -7  -7   4 45.3739 1.34678   1 
   6  10   4 142.262 2.45522  -2 
  -6  -7   4 142.262 2.45522   1 
   5  10   4 153.615 2.23735  -2 
  -5  -7   4 153.615 2.23735   1 
   4  10   4 586.905 6.69681  -2 
  -4  -7   4 586.905 6.69681   1 
   3  10   4 777.528 8.67072  -2 
  -3  -7   4 777.528 8.67072   1 
   2  10   4 241.245 3.06464  -2 
  -2  -7   4 241.245 3.06464   1 
   1  10   4 144.624 1.99222  -2 
  -1  -7   4 144.624 1.99222   1 
   0  10   4 454.014 5.42762  -2 
   0  -7   4 454.014 5.42762   1 
  -1  10   4 345.780 4.44734  -2 
   1  -7   4 345.780 4.44734   1 
  -2  10   4 843.981 10.0139  -2 
   2  -7   4 843.981 10.0139   1 
  -3  10   4 237.319 3.39320  -2 
   3  -7   4 237.319 3.39320   1 
  -4  10   4 816.719 11.3554  -2 
   4  -7   4 816.719 11.3554   1 
  -5  10   4 106.749 2.36670  -2 
   5  -7   4 106.749 2.36670   1 
  -6  10   4 161.716 3.23681  -2 
   6  -7   4 161.716 3.23681   1 
  -7  10   4 85.6822 2.45148  -2 
   7  -7   4 85.6822 2.45148   1 
  -8  10   4 19.8943 1.70109  -2 
   8  -7   4 19.8943 1.70109   1 
  -9  10   4 9.27984 2.13236  -2 
   9  -7   4 9.27984 2.13236   1 
 -10  10   4 253.004 6.91024  -2 
  10  -7   4 253.004 6.91024   1 
 -11  10   4 158.020 6.92329  -2 
  11  -7   4 158.020 6.92329   1 
  13   9   4 12.3442 5.53517  -2 
 -13  -6   4 12.3442 5.53517   1 
  12   9   4 192.492 6.98372  -2 
 -12  -6   4 192.492 6.98372   1 
  11   9   4 54.5701 3.61727  -2 
 -11  -6   4 54.5701 3.61727   1 
  10   9   4 91.3136 2.76837  -2 
 -10  -6   4 91.3136 2.76837   1 
   9   9   4 111.927 2.76270  -2 
  -9  -6   4 111.927 2.76270   1 
   8   9   4 157.530 2.93183  -2 
  -8  -6   4 157.530 2.93183   1 
   7   9   4 52.4697 1.42044  -2 
  -7  -6   4 52.4697 1.42044   1 
   6   9   4 493.531 6.56543  -2 
  -6  -6   4 493.531 6.56543   1 
   5   9   4 808.420 9.07059  -2 
  -5  -6   4 808.420 9.07059   1 
   4   9   4 1029.28 11.3593  -2 
  -4  -6   4 1029.28 11.3593   1 
   3   9   4 537.575 6.08007  -2 
  -3  -6   4 537.575 6.08007   1 
   2   9   4 510.080 5.98215  -2 
  -2  -6   4 510.080 5.98215   1 
   1   9   4 160.979 2.12034  -2 
  -1  -6   4 160.979 2.12034   1 
   0   9   4 470.137 5.55333  -2 
   0  -6   4 470.137 5.55333   1 
  -1   9   4 1051.07 12.0299  -2 
   1  -6   4 1051.07 12.0299   1 
  -2   9   4 836.060 9.68164  -2 
   2  -6   4 836.060 9.68164   1 
  -3   9   4 809.521 10.0906  -2 
   3  -6   4 809.521 10.0906   1 
  -4   9   4 560.499 7.23534  -2 
   4  -6   4 560.499 7.23534   1 
  -5   9   4 180.148 3.14498  -2 
   5  -6   4 180.148 3.14498   1 
  -6   9   4 79.9234 2.08780  -2 
   6  -6   4 79.9234 2.08780   1 
  -7   9   4 107.174 2.57348  -2 
   7  -6   4 107.174 2.57348   1 
  -8   9   4 40.8712 1.91851  -2 
   8  -6   4 40.8712 1.91851   1 
  -9   9   4 40.2104 2.20849  -2 
   9  -6   4 40.2104 2.20849   1 
 -10   9   4 249.805 6.73861  -2 
  10  -6   4 249.805 6.73861   1 
 -11   9   4 183.937 5.65035  -2 
  11  -6   4 183.937 5.65035   1 
  13   8   4 76.9701 5.65746  -2 
 -13  -5   4 76.9701 5.65746   1 
  12   8   4 39.6266 4.25086  -2 
 -12  -5   4 39.6266 4.25086   1 
  11   8   4 3.74965 1.39848  -2 
 -11  -5   4 3.74965 1.39848   1 
  10   8   4 49.7774 2.00253  -2 
 -10  -5   4 49.7774 2.00253   1 
   9   8   4 132.605 3.03989  -2 
  -9  -5   4 132.605 3.03989   1 
   8   8   4 22.3082 1.22379  -2 
  -8  -5   4 22.3082 1.22379   1 
   7   8   4 328.357 4.77079  -2 
  -7  -5   4 328.357 4.77079   1 
   6   8   4 586.145 7.32446  -2 
  -6  -5   4 586.145 7.32446   1 
   5   8   4 591.227 7.01102  -2 
  -5  -5   4 591.227 7.01102   1 
   4   8   4 968.920 10.6822  -2 
  -4  -5   4 968.920 10.6822   1 
   3   8   4 574.904 6.96833  -2 
  -3  -5   4 574.904 6.96833   1 
   2   8   4 365.417 4.51572  -2 
  -2  -5   4 365.417 4.51572   1 
   1   8   4 130.331 1.76411  -2 
  -1  -5   4 130.331 1.76411   1 
   0   8   4 1066.85 12.6206  -2 
   0  -5   4 1066.85 12.6206   1 
  -1   8   4 141.623 1.89819  -2 
   1  -5   4 141.623 1.89819   1 
  -2   8   4 637.453 7.43197  -2 
   2  -5   4 637.453 7.43197   1 
  -3   8   4 429.828 5.18688  -2 
   3  -5   4 429.828 5.18688   1 
  -4   8   4 437.497 5.73666  -2 
   4  -5   4 437.497 5.73666   1 
  -5   8   4 21.9240 1.03963  -2 
   5  -5   4 21.9240 1.03963   1 
  -6   8   4 603.902 8.71408  -2 
   6  -5   4 603.902 8.71408   1 
  -7   8   4 154.765 3.16702  -2 
   7  -5   4 154.765 3.16702   1 
  -8   8   4 255.732 4.92042  -2 
   8  -5   4 255.732 4.92042   1 
  -9   8   4 59.3372 2.26331  -2 
   9  -5   4 59.3372 2.26331   1 
 -10   8   4 189.542 5.54734  -2 
  10  -5   4 189.542 5.54734   1 
 -11   8   4 157.291 5.08207  -2 
  11  -5   4 157.291 5.08207   1 
  13   7   4 79.3240 4.65152  -2 
 -13  -4   4 79.3240 4.65152   1 
  12   7   4 87.1676 5.51742  -2 
 -12  -4   4 87.1676 5.51742   1 
  11   7   4 1.22202 1.35547  -2 
 -11  -4   4 1.22202 1.35547   1 
  10   7   4 11.9138 1.34716  -2 
 -10  -4   4 11.9138 1.34716   1 
   9   7   4 170.225 3.59966  -2 
  -9  -4   4 170.225 3.59966   1 
   8   7   4 83.0874 2.06085  -2 
  -8  -4   4 83.0874 2.06085   1 
   7   7   4 566.005 8.41444  -2 
  -7  -4   4 566.005 8.41444   1 
   6   7   4 542.065 6.54385  -2 
  -6  -4   4 542.065 6.54385   1 
   5   7   4 216.577 2.74663  -2 
  -5  -4   4 216.577 2.74663   1 
   4   7   4 908.868 10.8308  -2 
  -4  -4   4 908.868 10.8308   1 
   3   7   4 1222.41 15.0290  -2 
  -3  -4   4 1222.41 15.0290   1 
   2   7   4 62.2381 1.18204  -2 
  -2  -4   4 62.2381 1.18204   1 
   1   7   4 1333.25 15.9076  -2 
  -1  -4   4 1333.25 15.9076   1 
   0   7   4 569.941 7.52732  -2 
   0  -4   4 569.941 7.52732   1 
  -1   7   4 124.650 1.72730  -2 
   1  -4   4 124.650 1.72730   1 
  -2   7   4 871.231 9.98621  -2 
   2  -4   4 871.231 9.98621   1 
  -3   7   4 78.5214 1.28095  -2 
   3  -4   4 78.5214 1.28095   1 
  -4   7   4 40.2597 0.91625  -2 
   4  -4   4 40.2597 0.91625   1 
  -5   7   4 375.451 5.07232  -2 
   5  -4   4 375.451 5.07232   1 
  -6   7   4 398.507 6.01405  -2 
   6  -4   4 398.507 6.01405   1 
  -7   7   4 712.795 10.8272  -2 
   7  -4   4 712.795 10.8272   1 
  -8   7   4 156.118 3.43596  -2 
   8  -4   4 156.118 3.43596   1 
  -9   7   4 105.245 2.85664  -2 
   9  -4   4 105.245 2.85664   1 
 -10   7   4 79.6905 3.12933  -2 
  10  -4   4 79.6905 3.12933   1 
 -11   7   4 22.1103 2.59226  -2 
  11  -4   4 22.1103 2.59226   1 
 -12   7   4 36.7228 3.74611  -2 
  12  -4   4 36.7228 3.74611   1 
  13   6   4 101.931 4.56367  -2 
 -13  -3   4 101.931 4.56367   1 
  12   6   4 4.52444 2.40632  -2 
 -12  -3   4 4.52444 2.40632   1 
  11   6   4 9.56135 1.52822  -2 
 -11  -3   4 9.56135 1.52822   1 
  10   6   4 191.454 4.39865  -2 
 -10  -3   4 191.454 4.39865   1 
   9   6   4 48.6663 1.79925  -2 
  -9  -3   4 48.6663 1.79925   1 
   8   6   4 93.6580 2.22686  -2 
  -8  -3   4 93.6580 2.22686   1 
   7   6   4 592.584 8.26541  -2 
  -7  -3   4 592.584 8.26541   1 
   6   6   4 34.1652 0.91520  -2 
  -6  -3   4 34.1652 0.91520   1 
   5   6   4 54.7999 1.01512  -2 
  -5  -3   4 54.7999 1.01512   1 
   4   6   4 705.819 8.88894  -2 
  -4  -3   4 705.819 8.88894   1 
   3   6   4 281.970 3.73611  -2 
  -3  -3   4 281.970 3.73611   1 
   2   6   4 281.132 4.09382  -2 
  -2  -3   4 281.132 4.09382   1 
   1   6   4 2220.79 27.7134  -2 
  -1  -3   4 2220.79 27.7134   1 
   0   6   4 167.526 2.53930  -2 
   0  -3   4 167.526 2.53930   1 
  -1   6   4 376.966 5.39455  -2 
   1  -3   4 376.966 5.39455   1 
  -2   6   4 153.499 2.06151  -2 
   2  -3   4 153.499 2.06151   1 
  -3   6   4 370.265 4.45875  -2 
   3  -3   4 370.265 4.45875   1 
  -4   6   4 100.208 1.55787  -2 
   4  -3   4 100.208 1.55787   1 
  -5   6   4 211.160 3.09948  -2 
   5  -3   4 211.160 3.09948   1 
  -6   6   4 446.019 5.98513  -2 
   6  -3   4 446.019 5.98513   1 
  -7   6   4 204.014 3.77048  -2 
   7  -3   4 204.014 3.77048   1 
  -8   6   4 141.123 3.03380  -2 
   8  -3   4 141.123 3.03380   1 
  -9   6   4 77.1497 2.39584  -2 
   9  -3   4 77.1497 2.39584   1 
 -10   6   4 152.608 3.65693  -2 
  10  -3   4 152.608 3.65693   1 
 -11   6   4 136.377 4.59502  -2 
  11  -3   4 136.377 4.59502   1 
 -12   6   4 14.5613 2.50848  -2 
  12  -3   4 14.5613 2.50848   1 
  13   5   4 178.723 6.03579  -2 
 -13  -2   4 178.723 6.03579   1 
  12   5   4 70.6522 3.69238  -2 
 -12  -2   4 70.6522 3.69238   1 
  11   5   4 82.3610 2.56344  -2 
 -11  -2   4 82.3610 2.56344   1 
  10   5   4 217.043 5.19376  -2 
 -10  -2   4 217.043 5.19376   1 
   9   5   4 84.1645 2.31415  -2 
  -9  -2   4 84.1645 2.31415   1 
   8   5   4 126.853 2.67512  -2 
  -8  -2   4 126.853 2.67512   1 
   7   5   4 913.117 12.3629  -2 
  -7  -2   4 913.117 12.3629   1 
   6   5   4 10.5117 0.68937  -2 
  -6  -2   4 10.5117 0.68937   1 
   5   5   4 31.8726 0.78884  -2 
  -5  -2   4 31.8726 0.78884   1 
   4   5   4 732.636 9.18796  -2 
  -4  -2   4 732.636 9.18796   1 
   3   5   4 451.170 6.05776  -2 
  -3  -2   4 451.170 6.05776   1 
   2   5   4 1248.93 15.3164  -2 
  -2  -2   4 1248.93 15.3164   1 
   1   5   4 5511.01 68.5382  -2 
  -1  -2   4 5511.01 68.5382   1 
   0   5   4 202.054 2.77839  -2 
   0  -2   4 202.054 2.77839   1 
  -1   5   4 1.31655 0.39679  -2 
   1  -2   4 1.31655 0.39679   1 
  -2   5   4 457.506 6.10683  -2 
   2  -2   4 457.506 6.10683   1 
  -3   5   4 992.514 11.7904  -2 
   3  -2   4 992.514 11.7904   1 
  -4   5   4 58.9636 1.08202  -2 
   4  -2   4 58.9636 1.08202   1 
  -5   5   4 43.0864 0.96151  -2 
   5  -2   4 43.0864 0.96151   1 
  -6   5   4 96.1977 1.84097  -2 
   6  -2   4 96.1977 1.84097   1 
  -7   5   4 78.0522 1.91370  -2 
   7  -2   4 78.0522 1.91370   1 
  -8   5   4 248.953 4.48968  -2 
   8  -2   4 248.953 4.48968   1 
  -9   5   4 187.929 3.95343  -2 
   9  -2   4 187.929 3.95343   1 
 -10   5   4 62.0287 2.31983  -2 
  10  -2   4 62.0287 2.31983   1 
 -11   5   4 -3.7795 2.05250  -2 
  11  -2   4 -3.7795 2.05250   1 
 -12   5   4 15.4903 2.53087  -2 
  12  -2   4 15.4903 2.53087   1 
  13   4   4 195.712 7.27383  -2 
 -13  -1   4 195.712 7.27383   1 
  12   4   4 -0.6218 2.36475  -2 
 -12  -1   4 -0.6218 2.36475   1 
  11   4   4 97.7238 2.85721  -2 
 -11  -1   4 97.7238 2.85721   1 
  10   4   4 160.363 3.58445  -2 
 -10  -1   4 160.363 3.58445   1 
   9   4   4 120.507 3.05017  -2 
  -9  -1   4 120.507 3.05017   1 
   8   4   4 319.330 5.33279  -2 
  -8  -1   4 319.330 5.33279   1 
   7   4   4 461.462 6.58243  -2 
  -7  -1   4 461.462 6.58243   1 
   6   4   4 0.27967 0.62207  -2 
  -6  -1   4 0.27967 0.62207   1 
   5   4   4 11.2952 0.60071  -2 
  -5  -1   4 11.2952 0.60071   1 
   4   4   4 615.117 8.21363  -2 
  -4  -1   4 615.117 8.21363   1 
   3   4   4 587.420 7.75441  -2 
  -3  -1   4 587.420 7.75441   1 
   2   4   4 662.415 9.11024  -2 
  -2  -1   4 662.415 9.11024   1 
  -2  -1   4 610.289 23.9977   1 
  -1  -1   4 349.566 10.1230   1 
   1   4   4 3108.76 41.9795  -2 
  -1  -1   4 3108.76 41.9795   1 
  -1  -1   4 342.751 14.2745   2 
   0   4   4 762.014 10.7783  -2 
   0  -1   4 762.014 10.7783   1 
   0  -1   4 690.266 28.1420   1 
   0  -1   4 779.974 31.8071   2 
  -1   4   4 105.983 1.54889  -2 
   1  -1   4 105.983 1.54889   1 
  -2   4   4 522.050 7.33762  -2 
   2  -1   4 522.050 7.33762   1 
  -3   4   4 1024.20 12.1285  -2 
   3  -1   4 1024.20 12.1285   1 
  -4   4   4 572.126 6.73256  -2 
   4  -1   4 572.126 6.73256   1 
  -5   4   4 29.0855 0.83017  -2 
   5  -1   4 29.0855 0.83017   1 
  -6   4   4 203.827 3.05696  -2 
   6  -1   4 203.827 3.05696   1 
  -7   4   4 279.755 4.27983  -2 
   7  -1   4 279.755 4.27983   1 
  -8   4   4 92.9250 2.31504  -2 
   8  -1   4 92.9250 2.31504   1 
  -9   4   4 199.828 4.10662  -2 
   9  -1   4 199.828 4.10662   1 
 -10   4   4 33.6915 1.84646  -2 
  10  -1   4 33.6915 1.84646   1 
 -11   4   4 40.2906 2.70541  -2 
  11  -1   4 40.2906 2.70541   1 
 -12   4   4 53.0407 3.10776  -2 
  12  -1   4 53.0407 3.10776   1 
  13   3   4 129.986 5.82298  -2 
 -13   0   4 129.986 5.82298   1 
  12   3   4 146.026 5.18160  -2 
 -12   0   4 146.026 5.18160   1 
  11   3   4 161.849 5.19668  -2 
 -11   0   4 161.849 5.19668   1 
  10   3   4 163.848 3.64384  -2 
 -10   0   4 163.848 3.64384   1 
   9   3   4 17.1677 1.27915  -2 
  -9   0   4 17.1677 1.27915   1 
   8   3   4 366.842 5.99499  -2 
  -8   0   4 366.842 5.99499   1 
   7   3   4 1345.86 18.9329  -2 
  -7   0   4 1345.86 18.9329   1 
   6   3   4 294.826 3.95515  -2 
  -6   0   4 294.826 3.95515   1 
   5   3   4 306.454 3.99345  -2 
  -5   0   4 306.454 3.99345   1 
   4   3   4 743.548 10.4679  -2 
  -4   0   4 743.548 10.4679   1 
   3   3   4 282.826 3.69510  -2 
  -3   0   4 282.826 3.69510   1 
   2   3   4 429.596 5.65317  -2 
  -2   0   4 429.596 5.65317   1 
  -1   0   4 1158.03 34.5535   2 
   1   3   4 1477.18 39.8404  -2 
  -1   0   4 1477.18 39.8404   1 
  -1   0   4 1225.87 22.6855   1 
   0   3   4 202.079 4.62543  -2 
   0   0   4 202.079 4.62543   1 
  -1   3   4 1905.37 29.8540  -2 
   1   0   4 1905.37 29.8540   1 
   1   0   4 1454.71 42.9188   2 
   1   0   4 1461.62 33.5211   1 
  -2   3   4 451.929 6.35751  -2 
   2   0   4 451.929 6.35751   1 
  -3   3   4 719.230 8.99244  -2 
   3   0   4 719.230 8.99244   1 
  -4   3   4 310.584 3.81685  -2 
   4   0   4 310.584 3.81685   1 
  -5   3   4 233.549 3.17743  -2 
   5   0   4 233.549 3.17743   1 
  -6   3   4 9.33430 0.77940  -2 
   6   0   4 9.33430 0.77940   1 
  -7   3   4 605.694 8.27861  -2 
   7   0   4 605.694 8.27861   1 
  -8   3   4 271.500 5.05796  -2 
   8   0   4 271.500 5.05796   1 
  -9   3   4 199.208 4.35888  -2 
   9   0   4 199.208 4.35888   1 
 -10   3   4 10.3986 1.52421  -2 
  10   0   4 10.3986 1.52421   1 
 -11   3   4 177.018 4.39726  -2 
  11   0   4 177.018 4.39726   1 
 -12   3   4 1.68602 2.20360  -2 
  12   0   4 1.68602 2.20360   1 
 -13   3   4 87.2648 4.89818  -2 
  13   0   4 87.2648 4.89818   1 
  13   2   4 235.726 9.98878  -2 
 -13   1   4 235.726 9.98878   1 
  12   2   4 73.6721 3.80133  -2 
 -12   1   4 73.6721 3.80133   1 
  11   2   4 67.6427 2.50309  -2 
 -11   1   4 67.6427 2.50309   1 
  10   2   4 14.8752 1.44114  -2 
 -10   1   4 14.8752 1.44114   1 
   9   2   4 125.126 2.75411  -2 
  -9   1   4 125.126 2.75411   1 
   8   2   4 595.705 9.12246  -2 
  -8   1   4 595.705 9.12246   1 
   7   2   4 1839.63 24.0438  -2 
  -7   1   4 1839.63 24.0438   1 
   6   2   4 303.890 4.06194  -2 
  -6   1   4 303.890 4.06194   1 
   5   2   4 410.400 5.43750  -2 
  -5   1   4 410.400 5.43750   1 
   4   2   4 119.178 2.06636  -2 
  -4   1   4 119.178 2.06636   1 
   3   2   4 377.301 5.10118  -2 
  -3   1   4 377.301 5.10118   1 
   2   2   4 167.613 2.46708  -2 
  -2   1   4 167.613 2.46708   1 
  -1   1   4 426.275 8.11640   2 
  -1   1   4 426.195 11.9566   1 
   1   1   4 73.3651 1.58141   1 
   1   1   4 77.2708 1.90279   2 
  -1   2   4 1279.16 30.4046  -2 
   1   1   4 1279.16 30.4046   1 
  -2   2   4 525.568 6.93083  -2 
   2   1   4 525.568 6.93083   1 
   2   1   4 237.333 9.98435   1 
  -3   2   4 376.594 5.77942  -2 
   3   1   4 376.594 5.77942   1 
  -4   2   4 55.8705 1.08580  -2 
   4   1   4 55.8705 1.08580   1 
  -5   2   4 145.337 2.15162  -2 
   5   1   4 145.337 2.15162   1 
  -6   2   4 464.974 6.08383  -2 
   6   1   4 464.974 6.08383   1 
  -7   2   4 726.420 9.75098  -2 
   7   1   4 726.420 9.75098   1 
  -8   2   4 657.093 10.7079  -2 
   8   1   4 657.093 10.7079   1 
  -9   2   4 237.938 4.67803  -2 
   9   1   4 237.938 4.67803   1 
 -10   2   4 68.5333 2.46178  -2 
  10   1   4 68.5333 2.46178   1 
 -11   2   4 96.5313 3.06688  -2 
  11   1   4 96.5313 3.06688   1 
 -12   2   4 15.9905 2.35387  -2 
  12   1   4 15.9905 2.35387   1 
 -13   2   4 84.5296 4.28851  -2 
  13   1   4 84.5296 4.28851   1 
  13   1   4 90.9413 6.13683  -2 
 -13   2   4 90.9413 6.13683   1 
  12   1   4 16.0064 2.68684  -2 
 -12   2   4 16.0064 2.68684   1 
  11   1   4 98.3583 4.06157  -2 
 -11   2   4 98.3583 4.06157   1 
  10   1   4 64.2429 2.18474  -2 
 -10   2   4 64.2429 2.18474   1 
   9   1   4 238.340 4.32225  -2 
  -9   2   4 238.340 4.32225   1 
   8   1   4 656.596 9.41360  -2 
  -8   2   4 656.596 9.41360   1 
   7   1   4 706.201 10.2283  -2 
  -7   2   4 706.201 10.2283   1 
   6   1   4 462.923 5.88335  -2 
  -6   2   4 462.923 5.88335   1 
   5   1   4 145.488 2.03396  -2 
  -5   2   4 145.488 2.03396   1 
   4   1   4 55.3689 1.17191  -2 
  -4   2   4 55.3689 1.17191   1 
   3   1   4 375.536 5.05726  -2 
  -3   2   4 375.536 5.05726   1 
   2   1   4 518.536 6.43514  -2 
  -2   2   4 518.536 6.43514   1 
  -1   2   4 1252.31 23.7781   1 
  -1   2   4 1303.63 24.4691   2 
   1   1   4 1357.27 42.1885  -2 
  -1   2   4 1357.27 42.1885   1 
   1   2   4 796.616 16.5111   1 
   1   2   4 801.299 22.2686   2 
  -2   1   4 177.496 2.80098  -2 
   2   2   4 177.496 2.80098   1 
   2   2   4 97.6037 4.45408   1 
  -3   1   4 382.451 5.86658  -2 
   3   2   4 382.451 5.86658   1 
  -4   1   4 124.110 1.99004  -2 
   4   2   4 124.110 1.99004   1 
  -5   1   4 407.662 5.20623  -2 
   5   2   4 407.662 5.20623   1 
  -6   1   4 302.014 4.09047  -2 
   6   2   4 302.014 4.09047   1 
  -7   1   4 1851.83 23.7387  -2 
   7   2   4 1851.83 23.7387   1 
  -8   1   4 593.766 9.24390  -2 
   8   2   4 593.766 9.24390   1 
  -9   1   4 124.336 2.84789  -2 
   9   2   4 124.336 2.84789   1 
 -10   1   4 13.7617 1.64778  -2 
  10   2   4 13.7617 1.64778   1 
 -11   1   4 72.1285 2.70670  -2 
  11   2   4 72.1285 2.70670   1 
 -12   1   4 66.2412 3.64424  -2 
  12   2   4 66.2412 3.64424   1 
 -13   1   4 224.372 8.63014  -2 
  13   2   4 224.372 8.63014   1 
  13   0   4 96.8568 6.35654  -2 
 -13   3   4 96.8568 6.35654   1 
  12   0   4 5.56102 2.56166  -2 
 -12   3   4 5.56102 2.56166   1 
  11   0   4 177.395 5.59878  -2 
 -11   3   4 177.395 5.59878   1 
  10   0   4 12.4016 1.41928  -2 
 -10   3   4 12.4016 1.41928   1 
   9   0   4 204.330 3.85362  -2 
  -9   3   4 204.330 3.85362   1 
   8   0   4 274.735 4.44835  -2 
  -8   3   4 274.735 4.44835   1 
   7   0   4 612.760 8.73462  -2 
  -7   3   4 612.760 8.73462   1 
   6   0   4 10.3615 0.66544  -2 
  -6   3   4 10.3615 0.66544   1 
   5   0   4 225.271 3.04495  -2 
  -5   3   4 225.271 3.04495   1 
   4   0   4 305.154 4.53651  -2 
  -4   3   4 305.154 4.53651   1 
   3   0   4 702.898 9.73928  -2 
  -3   3   4 702.898 9.73928   1 
   2   0   4 448.413 5.88897  -2 
  -2   3   4 448.413 5.88897   1 
  -2   3   4 363.907 14.9685   1 
  -1   3   4 472.749 11.3198   1 
   1   0   4 1971.51 30.3962  -2 
  -1   3   4 1971.51 30.3962   1 
  -1   3   4 475.199 11.0371   2 
   0   0   4 223.188 4.37393  -2 
   0   3   4 223.188 4.37393   1 
   1   3   4 484.475 11.3868   1 
  -1   0   4 1628.08 27.0227  -2 
   1   3   4 1628.08 27.0227   1 
   1   3   4 565.493 15.3611   2 
  -2   0   4 436.956 5.48340  -2 
   2   3   4 436.956 5.48340   1 
  -3   0   4 286.687 4.22663  -2 
   3   3   4 286.687 4.22663   1 
  -4   0   4 760.042 10.1324  -2 
   4   3   4 760.042 10.1324   1 
  -5   0   4 304.471 4.21594  -2 
   5   3   4 304.471 4.21594   1 
  -6   0   4 294.165 4.17983  -2 
   6   3   4 294.165 4.17983   1 
  -7   0   4 1343.64 18.5218  -2 
   7   3   4 1343.64 18.5218   1 
  -8   0   4 360.637 6.47957  -2 
   8   3   4 360.637 6.47957   1 
  -9   0   4 19.6518 1.65859  -2 
   9   3   4 19.6518 1.65859   1 
 -10   0   4 164.801 4.09384  -2 
  10   3   4 164.801 4.09384   1 
 -11   0   4 159.883 4.03717  -2 
  11   3   4 159.883 4.03717   1 
 -12   0   4 146.524 5.34719  -2 
  12   3   4 146.524 5.34719   1 
 -13   0   4 117.936 4.91500  -2 
  13   3   4 117.936 4.91500   1 
  12  -1   4 53.7245 3.59854  -2 
 -12   4   4 53.7245 3.59854   1 
  11  -1   4 37.2167 3.00907  -2 
 -11   4   4 37.2167 3.00907   1 
  10  -1   4 32.8283 1.72911  -2 
 -10   4   4 32.8283 1.72911   1 
   9  -1   4 202.520 3.87197  -2 
  -9   4   4 202.520 3.87197   1 
   8  -1   4 87.4557 2.04893  -2 
  -8   4   4 87.4557 2.04893   1 
   7  -1   4 276.530 4.38120  -2 
  -7   4   4 276.530 4.38120   1 
   6  -1   4 198.224 2.74085  -2 
  -6   4   4 198.224 2.74085   1 
   5  -1   4 29.0858 0.77245  -2 
  -5   4   4 29.0858 0.77245   1 
   4  -1   4 571.826 7.29855  -2 
  -4   4   4 571.826 7.29855   1 
   3  -1   4 1001.35 13.0286  -2 
  -3   4   4 1001.35 13.0286   1 
   2  -1   4 517.234 6.46924  -2 
  -2   4   4 517.234 6.46924   1 
   1  -1   4 106.699 1.45634  -2 
  -1   4   4 106.699 1.45634   1 
   0  -1   4 779.121 10.9102  -2 
   0   4   4 779.121 10.9102   1 
  -1  -1   4 3129.18 39.5758  -2 
   1   4   4 3129.18 39.5758   1 
   1   4   4 2706.74 109.602   1 
   1   4   4 2835.40 112.070   2 
  -2  -1   4 655.387 7.73598  -2 
   2   4   4 655.387 7.73598   1 
  -3  -1   4 589.770 7.81896  -2 
   3   4   4 589.770 7.81896   1 
  -4  -1   4 641.052 8.18863  -2 
   4   4   4 641.052 8.18863   1 
  -5  -1   4 13.0928 0.68324  -2 
   5   4   4 13.0928 0.68324   1 
  -6  -1   4 -0.4763 0.69019  -2 
   6   4   4 -0.4763 0.69019   1 
  -7  -1   4 452.779 6.42248  -2 
   7   4   4 452.779 6.42248   1 
  -8  -1   4 325.530 5.48884  -2 
   8   4   4 325.530 5.48884   1 
  -9  -1   4 119.009 3.31778  -2 
   9   4   4 119.009 3.31778   1 
 -10  -1   4 161.064 4.04558  -2 
  10   4   4 161.064 4.04558   1 
 -11  -1   4 102.955 3.34113  -2 
  11   4   4 102.955 3.34113   1 
 -12  -1   4 0.91915 2.09766  -2 
  12   4   4 0.91915 2.09766   1 
 -13  -1   4 172.064 5.86904  -2 
  13   4   4 172.064 5.86904   1 
  12  -2   4 10.0852 2.88068  -2 
 -12   5   4 10.0852 2.88068   1 
  11  -2   4 -3.6160 2.33152  -2 
 -11   5   4 -3.6160 2.33152   1 
  10  -2   4 61.3602 2.28803  -2 
 -10   5   4 61.3602 2.28803   1 
   9  -2   4 182.912 3.62377  -2 
  -9   5   4 182.912 3.62377   1 
   8  -2   4 246.797 4.37801  -2 
  -8   5   4 246.797 4.37801   1 
   7  -2   4 74.5573 1.80691  -2 
  -7   5   4 74.5573 1.80691   1 
   6  -2   4 97.8021 1.78984  -2 
  -6   5   4 97.8021 1.78984   1 
   5  -2   4 42.8040 0.98699  -2 
  -5   5   4 42.8040 0.98699   1 
   4  -2   4 58.7415 1.07403  -2 
  -4   5   4 58.7415 1.07403   1 
   3  -2   4 968.528 12.0259  -2 
  -3   5   4 968.528 12.0259   1 
   2  -2   4 460.386 6.11920  -2 
  -2   5   4 460.386 6.11920   1 
   1  -2   4 2.50820 0.37340  -2 
  -1   5   4 2.50820 0.37340   1 
   0  -2   4 207.363 2.68940  -2 
   0   5   4 207.363 2.68940   1 
  -1  -2   4 5618.95 68.0829  -2 
   1   5   4 5618.95 68.0829   1 
  -2  -2   4 1227.78 14.9737  -2 
   2   5   4 1227.78 14.9737   1 
  -3  -2   4 446.585 5.43390  -2 
   3   5   4 446.585 5.43390   1 
  -4  -2   4 737.611 8.93221  -2 
   4   5   4 737.611 8.93221   1 
  -5  -2   4 30.8709 0.86601  -2 
   5   5   4 30.8709 0.86601   1 
  -6  -2   4 8.76409 0.76549  -2 
   6   5   4 8.76409 0.76549   1 
  -7  -2   4 898.283 11.9788  -2 
   7   5   4 898.283 11.9788   1 
  -8  -2   4 128.868 2.77229  -2 
   8   5   4 128.868 2.77229   1 
  -9  -2   4 82.8538 2.40992  -2 
   9   5   4 82.8538 2.40992   1 
 -10  -2   4 210.760 5.29739  -2 
  10   5   4 210.760 5.29739   1 
 -11  -2   4 86.7879 3.10785  -2 
  11   5   4 86.7879 3.10785   1 
 -12  -2   4 74.1916 4.34917  -2 
  12   5   4 74.1916 4.34917   1 
 -13  -2   4 168.195 5.14146  -2 
  13   5   4 168.195 5.14146   1 
  12  -3   4 15.2577 4.16900  -2 
 -12   6   4 15.2577 4.16900   1 
  11  -3   4 140.924 5.10285  -2 
 -11   6   4 140.924 5.10285   1 
  10  -3   4 146.859 4.03866  -2 
 -10   6   4 146.859 4.03866   1 
   9  -3   4 74.1759 2.34237  -2 
  -9   6   4 74.1759 2.34237   1 
   8  -3   4 143.405 2.99540  -2 
  -8   6   4 143.405 2.99540   1 
   7  -3   4 202.304 3.48030  -2 
  -7   6   4 202.304 3.48030   1 
   6  -3   4 442.643 6.47402  -2 
  -6   6   4 442.643 6.47402   1 
   5  -3   4 210.231 2.82932  -2 
  -5   6   4 210.231 2.82932   1 
   4  -3   4 99.5617 1.52392  -2 
  -4   6   4 99.5617 1.52392   1 
   3  -3   4 366.017 4.78186  -2 
  -3   6   4 366.017 4.78186   1 
   2  -3   4 152.799 2.27837  -2 
  -2   6   4 152.799 2.27837   1 
   1  -3   4 383.561 5.44425  -2 
  -1   6   4 383.561 5.44425   1 
   0  -3   4 170.259 2.41731  -2 
   0   6   4 170.259 2.41731   1 
  -1  -3   4 2251.89 28.8188  -2 
   1   6   4 2251.89 28.8188   1 
  -2  -3   4 280.196 3.65965  -2 
   2   6   4 280.196 3.65965   1 
  -3  -3   4 276.465 3.35276  -2 
   3   6   4 276.465 3.35276   1 
  -4  -3   4 715.019 7.97160  -2 
   4   6   4 715.019 7.97160   1 
  -5  -3   4 56.0124 1.10616  -2 
   5   6   4 56.0124 1.10616   1 
  -6  -3   4 32.6574 1.02604  -2 
   6   6   4 32.6574 1.02604   1 
  -7  -3   4 575.524 7.95114  -2 
   7   6   4 575.524 7.95114   1 
  -8  -3   4 96.8095 2.34512  -2 
   8   6   4 96.8095 2.34512   1 
  -9  -3   4 47.2299 1.86962  -2 
   9   6   4 47.2299 1.86962   1 
 -10  -3   4 186.742 4.31337  -2 
  10   6   4 186.742 4.31337   1 
 -11  -3   4 6.00070 2.07178  -2 
  11   6   4 6.00070 2.07178   1 
 -12  -3   4 10.0341 3.01611  -2 
  12   6   4 10.0341 3.01611   1 
 -13  -3   4 97.0505 3.79031  -2 
  13   6   4 97.0505 3.79031   1 
  12  -4   4 37.3095 4.87350  -2 
 -12   7   4 37.3095 4.87350   1 
  11  -4   4 23.8640 3.05085  -2 
 -11   7   4 23.8640 3.05085   1 
  10  -4   4 87.2055 3.82399  -2 
 -10   7   4 87.2055 3.82399   1 
   9  -4   4 106.061 2.80859  -2 
  -9   7   4 106.061 2.80859   1 
   8  -4   4 149.992 3.10958  -2 
  -8   7   4 149.992 3.10958   1 
   7  -4   4 706.794 10.0624  -2 
  -7   7   4 706.794 10.0624   1 
   6  -4   4 397.474 5.92341  -2 
  -6   7   4 397.474 5.92341   1 
   5  -4   4 357.476 4.67280  -2 
  -5   7   4 357.476 4.67280   1 
   4  -4   4 41.1659 0.92338  -2 
  -4   7   4 41.1659 0.92338   1 
   3  -4   4 78.6713 1.25468  -2 
  -3   7   4 78.6713 1.25468   1 
   2  -4   4 875.712 10.4201  -2 
  -2   7   4 875.712 10.4201   1 
   1  -4   4 124.178 1.90269  -2 
  -1   7   4 124.178 1.90269   1 
   0  -4   4 577.795 7.62658  -2 
   0   7   4 577.795 7.62658   1 
  -1  -4   4 1347.59 17.4001  -2 
   1   7   4 1347.59 17.4001   1 
  -2  -4   4 61.6350 0.98409  -2 
   2   7   4 61.6350 0.98409   1 
  -3  -4   4 1224.88 13.8264  -2 
   3   7   4 1224.88 13.8264   1 
  -4  -4   4 896.402 10.3080  -2 
   4   7   4 896.402 10.3080   1 
  -5  -4   4 217.931 2.78788  -2 
   5   7   4 217.931 2.78788   1 
  -6  -4   4 542.343 6.72953  -2 
   6   7   4 542.343 6.72953   1 
  -7  -4   4 566.101 7.83734  -2 
   7   7   4 566.101 7.83734   1 
  -8  -4   4 81.8504 2.25549  -2 
   8   7   4 81.8504 2.25549   1 
  -9  -4   4 163.144 3.60955  -2 
   9   7   4 163.144 3.60955   1 
 -10  -4   4 11.3688 1.59210  -2 
  10   7   4 11.3688 1.59210   1 
 -11  -4   4 1.30265 1.67059  -2 
  11   7   4 1.30265 1.67059   1 
 -12  -4   4 83.3354 4.55382  -2 
  12   7   4 83.3354 4.55382   1 
 -13  -4   4 76.0338 3.44430  -2 
  13   7   4 76.0338 3.44430   1 
  11  -5   4 165.548 5.68909  -2 
 -11   8   4 165.548 5.68909   1 
  10  -5   4 185.849 4.74835  -2 
 -10   8   4 185.849 4.74835   1 
   9  -5   4 58.5584 2.28703  -2 
  -9   8   4 58.5584 2.28703   1 
   8  -5   4 251.514 4.55251  -2 
  -8   8   4 251.514 4.55251   1 
   7  -5   4 155.972 3.10410  -2 
  -7   8   4 155.972 3.10410   1 
   6  -5   4 604.881 8.65902  -2 
  -6   8   4 604.881 8.65902   1 
   5  -5   4 21.1202 1.04069  -2 
  -5   8   4 21.1202 1.04069   1 
   4  -5   4 424.100 5.18479  -2 
  -4   8   4 424.100 5.18479   1 
   3  -5   4 422.229 5.08485  -2 
  -3   8   4 422.229 5.08485   1 
   2  -5   4 634.232 7.38073  -2 
  -2   8   4 634.232 7.38073   1 
   1  -5   4 140.241 2.03654  -2 
  -1   8   4 140.241 2.03654   1 
   0  -5   4 1089.72 12.8847  -2 
   0   8   4 1089.72 12.8847   1 
  -1  -5   4 132.385 1.89652  -2 
   1   8   4 132.385 1.89652   1 
  -2  -5   4 362.019 4.30598  -2 
   2   8   4 362.019 4.30598   1 
  -3  -5   4 568.147 6.39054  -2 
   3   8   4 568.147 6.39054   1 
  -4  -5   4 975.964 10.7889  -2 
   4   8   4 975.964 10.7889   1 
  -5  -5   4 587.854 6.49103  -2 
   5   8   4 587.854 6.49103   1 
  -6  -5   4 591.579 7.27912  -2 
   6   8   4 591.579 7.27912   1 
  -7  -5   4 327.804 4.84212  -2 
   7   8   4 327.804 4.84212   1 
  -8  -5   4 22.2513 1.42573  -2 
   8   8   4 22.2513 1.42573   1 
  -9  -5   4 131.451 3.11408  -2 
   9   8   4 131.451 3.11408   1 
 -10  -5   4 50.9585 2.17174  -2 
  10   8   4 50.9585 2.17174   1 
 -11  -5   4 1.82139 1.55498  -2 
  11   8   4 1.82139 1.55498   1 
 -12  -5   4 40.2215 2.69324  -2 
  12   8   4 40.2215 2.69324   1 
 -13  -5   4 73.9386 3.42435  -2 
  13   8   4 73.9386 3.42435   1 
  11  -6   4 176.875 8.38515  -2 
 -11   9   4 176.875 8.38515   1 
  10  -6   4 258.557 7.30548  -2 
 -10   9   4 258.557 7.30548   1 
   9  -6   4 40.6165 2.16269  -2 
  -9   9   4 40.6165 2.16269   1 
   8  -6   4 40.7124 1.82803  -2 
  -8   9   4 40.7124 1.82803   1 
   7  -6   4 103.082 2.42351  -2 
  -7   9   4 103.082 2.42351   1 
   6  -6   4 81.6297 1.91758  -2 
  -6   9   4 81.6297 1.91758   1 
   5  -6   4 175.816 3.03325  -2 
  -5   9   4 175.816 3.03325   1 
   4  -6   4 553.151 7.63078  -2 
  -4   9   4 553.151 7.63078   1 
   3  -6   4 791.600 9.23275  -2 
  -3   9   4 791.600 9.23275   1 
   2  -6   4 832.501 9.63181  -2 
  -2   9   4 832.501 9.63181   1 
   1  -6   4 1052.12 12.5692  -2 
  -1   9   4 1052.12 12.5692   1 
   0  -6   4 481.471 5.68063  -2 
   0   9   4 481.471 5.68063   1 
  -1  -6   4 163.899 2.22736  -2 
   1   9   4 163.899 2.22736   1 
  -2  -6   4 498.659 5.64596  -2 
   2   9   4 498.659 5.64596   1 
  -3  -6   4 534.659 6.07031  -2 
   3   9   4 534.659 6.07031   1 
  -4  -6   4 1011.55 11.6321  -2 
   4   9   4 1011.55 11.6321   1 
  -5  -6   4 796.388 9.14921  -2 
   5   9   4 796.388 9.14921   1 
  -6  -6   4 489.408 6.15082  -2 
   6   9   4 489.408 6.15082   1 
  -7  -6   4 51.9434 1.54617  -2 
   7   9   4 51.9434 1.54617   1 
  -8  -6   4 157.702 3.39277  -2 
   8   9   4 157.702 3.39277   1 
  -9  -6   4 110.370 2.97184  -2 
   9   9   4 110.370 2.97184   1 
 -10  -6   4 96.3245 2.86807  -2 
  10   9   4 96.3245 2.86807   1 
 -11  -6   4 56.5439 2.37140  -2 
  11   9   4 56.5439 2.37140   1 
 -12  -6   4 189.307 5.43557  -2 
  12   9   4 189.307 5.43557   1 
 -13  -6   4 9.94862 4.07024  -2 
  13   9   4 9.94862 4.07024   1 
  11  -7   4 165.666 8.17341  -2 
 -11  10   4 165.666 8.17341   1 
  10  -7   4 262.746 7.47828  -2 
 -10  10   4 262.746 7.47828   1 
   9  -7   4 7.53760 2.40576  -2 
  -9  10   4 7.53760 2.40576   1 
   8  -7   4 20.0937 1.71746  -2 
  -8  10   4 20.0937 1.71746   1 
   7  -7   4 87.4456 2.26460  -2 
  -7  10   4 87.4456 2.26460   1 
   6  -7   4 156.414 3.10819  -2 
  -6  10   4 156.414 3.10819   1 
   5  -7   4 107.244 2.19721  -2 
  -5  10   4 107.244 2.19721   1 
   4  -7   4 818.616 11.3456  -2 
  -4  10   4 818.616 11.3456   1 
   3  -7   4 233.395 3.39433  -2 
  -3  10   4 233.395 3.39433   1 
   2  -7   4 847.477 9.84236  -2 
  -2  10   4 847.477 9.84236   1 
   1  -7   4 349.690 4.47318  -2 
  -1  10   4 349.690 4.47318   1 
   0  -7   4 460.520 5.49384  -2 
   0  10   4 460.520 5.49384   1 
  -1  -7   4 150.009 2.12198  -2 
   1  10   4 150.009 2.12198   1 
  -2  -7   4 237.570 3.05322  -2 
   2  10   4 237.570 3.05322   1 
  -3  -7   4 761.057 8.51093  -2 
   3  10   4 761.057 8.51093   1 
  -4  -7   4 572.524 6.68841  -2 
   4  10   4 572.524 6.68841   1 
  -5  -7   4 153.723 2.33877  -2 
   5  10   4 153.723 2.33877   1 
  -6  -7   4 142.839 2.39262  -2 
   6  10   4 142.839 2.39262   1 
  -7  -7   4 46.2387 1.47290  -2 
   7  10   4 46.2387 1.47290   1 
  -8  -7   4 177.922 3.49218  -2 
   8  10   4 177.922 3.49218   1 
  -9  -7   4 613.203 10.9484  -2 
   9  10   4 613.203 10.9484   1 
 -10  -7   4 201.773 4.56623  -2 
  10  10   4 201.773 4.56623   1 
 -11  -7   4 15.0303 1.75793  -2 
  11  10   4 15.0303 1.75793   1 
 -12  -7   4 95.3808 3.54499  -2 
  12  10   4 95.3808 3.54499   1 
 -13  -7   4 108.337 5.03441  -2 
  13  10   4 108.337 5.03441   1 
  10  -8   4 31.8269 3.63195  -2 
 -10  11   4 31.8269 3.63195   1 
   9  -8   4 72.6560 3.69560  -2 
  -9  11   4 72.6560 3.69560   1 
   8  -8   4 133.627 3.77536  -2 
  -8  11   4 133.627 3.77536   1 
   7  -8   4 38.4467 1.83550  -2 
  -7  11   4 38.4467 1.83550   1 
   6  -8   4 13.8500 1.27552  -2 
  -6  11   4 13.8500 1.27552   1 
   5  -8   4 113.715 2.46395  -2 
  -5  11   4 113.715 2.46395   1 
   4  -8   4 67.4600 1.65510  -2 
  -4  11   4 67.4600 1.65510   1 
   3  -8   4 309.141 4.68906  -2 
  -3  11   4 309.141 4.68906   1 
   2  -8   4 505.654 6.39206  -2 
  -2  11   4 505.654 6.39206   1 
   1  -8   4 264.942 3.74964  -2 
  -1  11   4 264.942 3.74964   1 
   0  -8   4 113.188 1.71196  -2 
   0  11   4 113.188 1.71196   1 
  -1  -8   4 151.794 2.20362  -2 
   1  11   4 151.794 2.20362   1 
  -2  -8   4 176.906 2.37876  -2 
   2  11   4 176.906 2.37876   1 
  -3  -8   4 294.824 3.84330  -2 
   3  11   4 294.824 3.84330   1 
  -4  -8   4 65.3468 1.34382  -2 
   4  11   4 65.3468 1.34382   1 
  -5  -8   4 215.938 3.06469  -2 
   5  11   4 215.938 3.06469   1 
  -6  -8   4 263.171 3.98762  -2 
   6  11   4 263.171 3.98762   1 
  -7  -8   4 52.1249 1.57965  -2 
   7  11   4 52.1249 1.57965   1 
  -8  -8   4 304.767 5.25662  -2 
   8  11   4 304.767 5.25662   1 
  -9  -8   4 131.298 3.12043  -2 
   9  11   4 131.298 3.12043   1 
 -10  -8   4 62.9483 2.41777  -2 
  10  11   4 62.9483 2.41777   1 
 -11  -8   4 24.8673 2.27203  -2 
  11  11   4 24.8673 2.27203   1 
 -12  -8   4 74.4891 3.36404  -2 
  12  11   4 74.4891 3.36404   1 
 -13  -8   4 37.8866 3.44572  -2 
  13  11   4 37.8866 3.44572   1 
  10  -9   4 221.438 9.61483  -2 
 -10  12   4 221.438 9.61483   1 
   9  -9   4 63.9222 3.69426  -2 
  -9  12   4 63.9222 3.69426   1 
   8  -9   4 5.76745 1.69312  -2 
  -8  12   4 5.76745 1.69312   1 
   7  -9   4 17.1150 1.66461  -2 
  -7  12   4 17.1150 1.66461   1 
   6  -9   4 5.11397 1.24598  -2 
  -6  12   4 5.11397 1.24598   1 
   5  -9   4 72.6965 1.97039  -2 
  -5  12   4 72.6965 1.97039   1 
   4  -9   4 143.495 2.84181  -2 
  -4  12   4 143.495 2.84181   1 
   3  -9   4 237.348 3.82171  -2 
  -3  12   4 237.348 3.82171   1 
   2  -9   4 18.4390 1.01205  -2 
  -2  12   4 18.4390 1.01205   1 
   1  -9   4 114.857 2.29194  -2 
  -1  12   4 114.857 2.29194   1 
   0  -9   4 83.3187 1.54564  -2 
   0  12   4 83.3187 1.54564   1 
  -1  -9   4 129.466 2.05279  -2 
   1  12   4 129.466 2.05279   1 
  -2  -9   4 311.732 4.15763  -2 
   2  12   4 311.732 4.15763   1 
  -3  -9   4 215.526 3.00825  -2 
   3  12   4 215.526 3.00825   1 
  -4  -9   4 76.8621 1.57055  -2 
   4  12   4 76.8621 1.57055   1 
  -5  -9   4 66.8603 1.55163  -2 
   5  12   4 66.8603 1.55163   1 
  -6  -9   4 7.22342 0.99607  -2 
   6  12   4 7.22342 0.99607   1 
  -7  -9   4 47.1287 1.58686  -2 
   7  12   4 47.1287 1.58686   1 
  -8  -9   4 49.0956 1.74404  -2 
   8  12   4 49.0956 1.74404   1 
  -9  -9   4 142.567 3.30169  -2 
   9  12   4 142.567 3.30169   1 
 -10  -9   4 11.8956 1.67966  -2 
  10  12   4 11.8956 1.67966   1 
 -11  -9   4 37.1742 2.46769  -2 
  11  12   4 37.1742 2.46769   1 
 -12  -9   4 23.7296 2.44122  -2 
  12  12   4 23.7296 2.44122   1 
   9 -10   4 125.564 6.90913  -2 
  -9  13   4 125.564 6.90913   1 
   8 -10   4 191.294 5.93883  -2 
  -8  13   4 191.294 5.93883   1 
   7 -10   4 17.7902 1.79567  -2 
  -7  13   4 17.7902 1.79567   1 
   6 -10   4 172.533 3.97175  -2 
  -6  13   4 172.533 3.97175   1 
   5 -10   4 49.2282 1.77374  -2 
  -5  13   4 49.2282 1.77374   1 
   4 -10   4 -1.9269 1.06800  -2 
  -4  13   4 -1.9269 1.06800   1 
   3 -10   4 123.222 2.57112  -2 
  -3  13   4 123.222 2.57112   1 
   2 -10   4 371.589 5.92535  -2 
  -2  13   4 371.589 5.92535   1 
   1 -10   4 118.025 2.25159  -2 
  -1  13   4 118.025 2.25159   1 
   0 -10   4 68.9295 1.61744  -2 
   0  13   4 68.9295 1.61744   1 
  -1 -10   4 218.258 3.51324  -2 
   1  13   4 218.258 3.51324   1 
  -2 -10   4 49.7187 1.35398  -2 
   2  13   4 49.7187 1.35398   1 
  -3 -10   4 98.1952 1.89943  -2 
   3  13   4 98.1952 1.89943   1 
  -4 -10   4 84.1632 1.77026  -2 
   4  13   4 84.1632 1.77026   1 
  -5 -10   4 6.40204 0.94800  -2 
   5  13   4 6.40204 0.94800   1 
  -6 -10   4 50.1480 1.56177  -2 
   6  13   4 50.1480 1.56177   1 
  -7 -10   4 11.2449 1.18539  -2 
   7  13   4 11.2449 1.18539   1 
  -8 -10   4 31.6061 1.54242  -2 
   8  13   4 31.6061 1.54242   1 
  -9 -10   4 4.37308 1.33230  -2 
   9  13   4 4.37308 1.33230   1 
 -10 -10   4 11.9750 1.79486  -2 
  10  13   4 11.9750 1.79486   1 
 -11 -10   4 11.5943 2.09357  -2 
  11  13   4 11.5943 2.09357   1 
 -12 -10   4 21.2894 2.38056  -2 
  12  13   4 21.2894 2.38056   1 
   9 -11   4 38.7727 4.63995  -2 
  -9  14   4 38.7727 4.63995   1 
   8 -11   4 24.6874 3.30280  -2 
  -8  14   4 24.6874 3.30280   1 
   7 -11   4 58.1483 3.33178  -2 
  -7  14   4 58.1483 3.33178   1 
   6 -11   4 1.00891 1.50010  -2 
  -6  14   4 1.00891 1.50010   1 
   5 -11   4 106.604 2.90590  -2 
  -5  14   4 106.604 2.90590   1 
   4 -11   4 149.591 3.09061  -2 
  -4  14   4 149.591 3.09061   1 
   3 -11   4 158.347 3.13437  -2 
  -3  14   4 158.347 3.13437   1 
   2 -11   4 238.479 4.44565  -2 
  -2  14   4 238.479 4.44565   1 
   1 -11   4 285.021 4.73441  -2 
  -1  14   4 285.021 4.73441   1 
   0 -11   4 43.1921 1.36204  -2 
   0  14   4 43.1921 1.36204   1 
  -1 -11   4 123.385 2.34712  -2 
   1  14   4 123.385 2.34712   1 
  -2 -11   4 87.9053 1.91114  -2 
   2  14   4 87.9053 1.91114   1 
  -3 -11   4 402.510 5.66869  -2 
   3  14   4 402.510 5.66869   1 
  -4 -11   4 133.242 2.54015  -2 
   4  14   4 133.242 2.54015   1 
  -5 -11   4 194.830 3.38178  -2 
   5  14   4 194.830 3.38178   1 
  -6 -11   4 6.81777 1.09664  -2 
   6  14   4 6.81777 1.09664   1 
  -7 -11   4 179.235 3.47632  -2 
   7  14   4 179.235 3.47632   1 
  -8 -11   4 0.75996 1.20045  -2 
   8  14   4 0.75996 1.20045   1 
  -9 -11   4 53.0140 1.93403  -2 
   9  14   4 53.0140 1.93403   1 
 -10 -11   4 16.2602 1.88026  -2 
  10  14   4 16.2602 1.88026   1 
 -11 -11   4 44.3515 2.68088  -2 
  11  14   4 44.3515 2.68088   1 
 -12 -11   4 6.46152 2.78998  -2 
  12  14   4 6.46152 2.78998   1 
   8 -12   4 167.640 8.05118  -2 
  -8  15   4 167.640 8.05118   1 
   7 -12   4 5.84566 2.55570  -2 
  -7  15   4 5.84566 2.55570   1 
   6 -12   4 147.424 4.03399  -2 
  -6  15   4 147.424 4.03399   1 
   5 -12   4 125.548 3.25911  -2 
  -5  15   4 125.548 3.25911   1 
   4 -12   4 -1.8561 1.35771  -2 
  -4  15   4 -1.8561 1.35771   1 
   3 -12   4 199.093 4.02736  -2 
  -3  15   4 199.093 4.02736   1 
   2 -12   4 594.312 9.77734  -2 
  -2  15   4 594.312 9.77734   1 
   1 -12   4 201.078 3.67052  -2 
  -1  15   4 201.078 3.67052   1 
   0 -12   4 34.7835 1.40439  -2 
   0  15   4 34.7835 1.40439   1 
  -1 -12   4 70.7093 1.85501  -2 
   1  15   4 70.7093 1.85501   1 
  -2 -12   4 131.088 2.67766  -2 
   2  15   4 131.088 2.67766   1 
  -3 -12   4 85.3843 1.97350  -2 
   3  15   4 85.3843 1.97350   1 
  -4 -12   4 360.134 5.51771  -2 
   4  15   4 360.134 5.51771   1 
  -5 -12   4 125.186 2.55296  -2 
   5  15   4 125.186 2.55296   1 
  -6 -12   4 9.02021 1.20334  -2 
   6  15   4 9.02021 1.20334   1 
  -7 -12   4 30.5765 1.51635  -2 
   7  15   4 30.5765 1.51635   1 
  -8 -12   4 9.44791 1.33635  -2 
   8  15   4 9.44791 1.33635   1 
  -9 -12   4 19.6543 1.65401  -2 
   9  15   4 19.6543 1.65401   1 
 -10 -12   4 69.6596 2.83237  -2 
  10  15   4 69.6596 2.83237   1 
 -11 -12   4 94.2499 3.74334  -2 
  11  15   4 94.2499 3.74334   1 
  12  15   4 30.8821 5.33800   2 
  12  15   4 34.3382 2.94621   1 
   7 -13   4 2.15242 2.88636  -2 
  -7  16   4 2.15242 2.88636   1 
   6 -13   4 76.3826 3.77762  -2 
  -6  16   4 76.3826 3.77762   1 
   5 -13   4 83.6808 2.94536  -2 
  -5  16   4 83.6808 2.94536   1 
   4 -13   4 74.7300 2.48581  -2 
  -4  16   4 74.7300 2.48581   1 
   3 -13   4 66.4531 2.30300  -2 
  -3  16   4 66.4531 2.30300   1 
   2 -13   4 111.451 2.92734  -2 
  -2  16   4 111.451 2.92734   1 
   1 -13   4 47.4056 1.70225  -2 
  -1  16   4 47.4056 1.70225   1 
   0 -13   4 6.81910 1.15014  -2 
   0  16   4 6.81910 1.15014   1 
  -1 -13   4 82.0924 2.10231  -2 
   1  16   4 82.0924 2.10231   1 
  -2 -13   4 146.537 2.97396  -2 
   2  16   4 146.537 2.97396   1 
  -3 -13   4 306.471 4.85913  -2 
   3  16   4 306.471 4.85913   1 
  -4 -13   4 232.889 4.11322  -2 
   4  16   4 232.889 4.11322   1 
  -5 -13   4 88.0766 2.23134  -2 
   5  16   4 88.0766 2.23134   1 
  -6 -13   4 2.95246 1.13803  -2 
   6  16   4 2.95246 1.13803   1 
  -7 -13   4 103.535 2.54130  -2 
   7  16   4 103.535 2.54130   1 
  -8 -13   4 4.41484 1.35200  -2 
   8  16   4 4.41484 1.35200   1 
  -9 -13   4 226.374 5.00513  -2 
   9  16   4 226.374 5.00513   1 
 -10 -13   4 203.795 4.75624  -2 
  10  16   4 203.795 4.75624   1 
 -11 -13   4 43.3479 2.75914  -2 
  11  16   4 43.3479 2.75914   1 
  -7  17   4 58.3979 4.86103   1 
  -7  17   4 58.3978 3.67950   2 
   6 -14   4 187.624 6.79924  -2 
  -6  17   4 187.624 6.79924   1 
   5 -14   4 136.264 3.92759  -2 
  -5  17   4 136.264 3.92759   1 
   4 -14   4 5.80449 1.71160  -2 
  -4  17   4 5.80449 1.71160   1 
   3 -14   4 2.27840 1.53251  -2 
  -3  17   4 2.27840 1.53251   1 
   2 -14   4 58.1616 2.19760  -2 
  -2  17   4 58.1616 2.19760   1 
   1 -14   4 31.3887 1.64858  -2 
  -1  17   4 31.3887 1.64858   1 
   0 -14   4 156.284 3.34345  -2 
   0  17   4 156.284 3.34345   1 
  -1 -14   4 150.518 3.22554  -2 
   1  17   4 150.518 3.22554   1 
  -2 -14   4 75.0062 2.01393  -2 
   2  17   4 75.0062 2.01393   1 
  -3 -14   4 112.969 2.54942  -2 
   3  17   4 112.969 2.54942   1 
  -4 -14   4 54.6428 1.78967  -2 
   4  17   4 54.6428 1.78967   1 
  -5 -14   4 43.6934 1.68318  -2 
   5  17   4 43.6934 1.68318   1 
  -6 -14   4 92.3130 2.34123  -2 
   6  17   4 92.3130 2.34123   1 
  -7 -14   4 27.0336 1.57602  -2 
   7  17   4 27.0336 1.57602   1 
  -8 -14   4 120.506 3.31552  -2 
   8  17   4 120.506 3.31552   1 
  -9 -14   4 61.4146 2.48823  -2 
   9  17   4 61.4146 2.48823   1 
 -10 -14   4 39.9226 2.41149  -2 
  10  17   4 39.9226 2.41149   1 
 -11 -14   4 60.1465 3.49271  -2 
  11  17   4 60.1465 3.49271   1 
  11  17   4 44.3394 5.91627   2 
   6 -15   4 36.1603 4.51345  -2 
  -6  18   4 36.1603 4.51345   1 
   5 -15   4 33.8454 3.41488  -2 
  -5  18   4 33.8454 3.41488   1 
   4 -15   4 108.465 3.72087  -2 
  -4  18   4 108.465 3.72087   1 
   3 -15   4 36.7283 2.18389  -2 
  -3  18   4 36.7283 2.18389   1 
   2 -15   4 34.7691 1.94495  -2 
  -2  18   4 34.7691 1.94495   1 
   1 -15   4 117.755 3.14648  -2 
  -1  18   4 117.755 3.14648   1 
   0 -15   4 105.499 2.91037  -2 
   0  18   4 105.499 2.91037   1 
  -1 -15   4 56.3176 1.99681  -2 
   1  18   4 56.3176 1.99681   1 
  -2 -15   4 104.105 2.49949  -2 
   2  18   4 104.105 2.49949   1 
  -3 -15   4 116.579 2.66824  -2 
   3  18   4 116.579 2.66824   1 
  -4 -15   4 12.5745 1.30778  -2 
   4  18   4 12.5745 1.30778   1 
  -5 -15   4 62.4336 1.98107  -2 
   5  18   4 62.4336 1.98107   1 
  -6 -15   4 19.2073 1.54243  -2 
   6  18   4 19.2073 1.54243   1 
  -7 -15   4 26.4719 1.84146  -2 
   7  18   4 26.4719 1.84146   1 
  -8 -15   4 18.9389 1.81332  -2 
   8  18   4 18.9389 1.81332   1 
  -9 -15   4 61.0344 2.69558  -2 
   9  18   4 61.0344 2.69558   1 
 -10 -15   4 19.8455 2.61124  -2 
  10  18   4 19.8455 2.61124   1 
   5 -16   4 82.5619 5.76421  -2 
  -5  19   4 82.5619 5.76421   1 
   4 -16   4 39.5164 3.67602  -2 
  -4  19   4 39.5164 3.67602   1 
   3 -16   4 11.8447 2.01543  -2 
  -3  19   4 11.8447 2.01543   1 
   2 -16   4 26.8844 2.10081  -2 
  -2  19   4 26.8844 2.10081   1 
   1 -16   4 20.9067 1.78283  -2 
  -1  19   4 20.9067 1.78283   1 
   0 -16   4 95.8925 2.83680  -2 
   0  19   4 95.8925 2.83680   1 
  -1 -16   4 109.883 3.02205  -2 
   1  19   4 109.883 3.02205   1 
  -2 -16   4 49.2362 1.96521  -2 
   2  19   4 49.2362 1.96521   1 
  -3 -16   4 9.44068 1.42574  -2 
   3  19   4 9.44068 1.42574   1 
  -4 -16   4 21.4327 1.58992  -2 
   4  19   4 21.4327 1.58992   1 
  -5 -16   4 12.7611 1.50550  -2 
   5  19   4 12.7611 1.50550   1 
  -6 -16   4 21.8851 1.76694  -2 
   6  19   4 21.8851 1.76694   1 
  -7 -16   4 39.8289 2.12572  -2 
   7  19   4 39.8289 2.12572   1 
  -8 -16   4 24.2794 2.12904  -2 
   8  19   4 24.2794 2.12904   1 
  -9 -16   4 1.49424 1.87196  -2 
   9  19   4 1.49424 1.87196   1 
   3 -17   4 86.8948 5.71827  -2 
  -3  20   4 86.8948 5.71827   1 
   2 -17   4 34.1928 3.40534  -2 
  -2  20   4 34.1928 3.40534   1 
   1 -17   4 42.4904 2.49590  -2 
  -1  20   4 42.4904 2.49590   1 
   0 -17   4 18.1162 1.99559  -2 
   0  20   4 18.1162 1.99559   1 
  -1 -17   4 33.3433 2.30325  -2 
   1  20   4 33.3433 2.30325   1 
  -2 -17   4 28.7401 1.77421  -2 
   2  20   4 28.7401 1.77421   1 
  -3 -17   4 120.044 3.26767  -2 
   3  20   4 120.044 3.26767   1 
  -4 -17   4 18.5961 1.72684  -2 
   4  20   4 18.5961 1.72684   1 
  -5 -17   4 29.6761 1.87727  -2 
   5  20   4 29.6761 1.87727   1 
  -6 -17   4 46.5121 2.33114  -2 
   6  20   4 46.5121 2.33114   1 
  -7 -17   4 22.7706 2.06405  -2 
   7  20   4 22.7706 2.06405   1 
  -8 -17   4 -2.4278 2.09604  -2 
   8  20   4 -2.4278 2.09604   1 
   2 -18   4 8.15191 3.79648  -2 
  -2  21   4 8.15191 3.79648   1 
   1 -18   4 -2.1217 1.79757  -2 
  -1  21   4 -2.1217 1.79757   1 
   0 -18   4 35.8923 3.31242  -2 
   0  21   4 35.8923 3.31242   1 
  -1 -18   4 55.7991 2.55288  -2 
   1  21   4 55.7991 2.55288   1 
  -2 -18   4 27.3051 2.06066  -2 
   2  21   4 27.3051 2.06066   1 
  -3 -18   4 64.5955 2.73423  -2 
   3  21   4 64.5955 2.73423   1 
  -4 -18   4 20.6970 1.98422  -2 
   4  21   4 20.6970 1.98422   1 
  -5 -18   4 22.7206 2.03812  -2 
   5  21   4 22.7206 2.03812   1 
  -6 -18   4 6.29442 1.91666  -2 
   6  21   4 6.29442 1.91666   1 
  -7 -18   4 12.2525 2.20526  -2 
   7  21   4 12.2525 2.20526   1 
   0 -19   4 11.0707 3.79840  -2 
   0  22   4 11.0707 3.79840   1 
  -1 -19   4 4.27253 3.61933  -2 
   1  22   4 4.27253 3.61933   1 
  -2 -19   4 37.2051 4.37638  -2 
   2  22   4 37.2051 4.37638   1 
  -3 -19   4 106.333 6.12015  -2 
   3  22   4 106.333 6.12015   1 
  -4 -19   4 45.8403 2.91071  -2 
   4  22   4 45.8403 2.91071   1 
  -5 -19   4 11.1184 2.22745  -2 
   5  22   4 11.1184 2.22745   1 
   6  22   5 21.0501 4.73009  -2 
  -6 -18   5 21.0501 4.73009   1 
   5  22   5 84.3139 7.27256  -2 
  -5 -18   5 84.3139 7.27256   1 
   4  22   5 7.66781 3.08746  -2 
  -4 -18   5 7.66781 3.08746   1 
   3  22   5 51.2289 3.49384  -2 
  -3 -18   5 51.2289 3.49384   1 
   2  22   5 51.2016 4.22948  -2 
  -2 -18   5 51.2016 4.22948   1 
   1  22   5 6.38177 3.97531  -2 
  -1 -18   5 6.38177 3.97531   1 
   0  22   5 8.69083 4.21289  -2 
   0 -18   5 8.69083 4.21289   1 
  -1  22   5 76.4704 7.29094  -2 
   1 -18   5 76.4704 7.29094   1 
   7  21   5 42.2431 4.16106  -2 
  -7 -17   5 42.2431 4.16106   1 
   6  21   5 308.181 8.02308  -2 
  -6 -17   5 308.181 8.02308   1 
   5  21   5 35.9978 2.68544  -2 
  -5 -17   5 35.9978 2.68544   1 
   4  21   5 237.154 6.54240  -2 
  -4 -17   5 237.154 6.54240   1 
   3  21   5 47.2279 2.81125  -2 
  -3 -17   5 47.2279 2.81125   1 
   2  21   5 43.1671 2.79312  -2 
  -2 -17   5 43.1671 2.79312   1 
   1  21   5 0.11997 1.95391  -2 
  -1 -17   5 0.11997 1.95391   1 
   0  21   5 151.059 5.67454  -2 
   0 -17   5 151.059 5.67454   1 
  -1  21   5 21.5057 3.28853  -2 
   1 -17   5 21.5057 3.28853   1 
  -2  21   5 194.584 11.9600  -2 
   2 -17   5 194.584 11.9600   1 
   3 -17   5 10.0425 4.02905   1 
   3 -17   5 13.3664 3.17621   2 
  -9 -16   5 10.6499 3.88037   2 
  -9 -16   5 3.32979 3.03242   1 
   8  20   5 13.7523 3.16799  -2 
  -8 -16   5 13.7523 3.16799   1 
   7  20   5 193.620 5.77557  -2 
  -7 -16   5 193.620 5.77557   1 
   6  20   5 18.0761 2.23462  -2 
  -6 -16   5 18.0761 2.23462   1 
   5  20   5 244.508 6.60096  -2 
  -5 -16   5 244.508 6.60096   1 
   4  20   5 7.13596 1.89929  -2 
  -4 -16   5 7.13596 1.89929   1 
   3  20   5 4.17080 1.82666  -2 
  -3 -16   5 4.17080 1.82666   1 
   2  20   5 19.1860 2.19423  -2 
  -2 -16   5 19.1860 2.19423   1 
   1  20   5 71.4953 3.18710  -2 
  -1 -16   5 71.4953 3.18710   1 
   0  20   5 57.7400 3.43747  -2 
   0 -16   5 57.7400 3.43747   1 
  -1  20   5 176.340 6.24547  -2 
   1 -16   5 176.340 6.24547   1 
  -2  20   5 21.6863 2.45434  -2 
   2 -16   5 21.6863 2.45434   1 
  -3  20   5 66.4402 3.89928  -2 
   3 -16   5 66.4402 3.89928   1 
  -4  20   5 14.8995 5.00342  -2 
   4 -16   5 14.8995 5.00342   1 
   9  19   5 45.8920 4.12847  -2 
  -9 -15   5 45.8920 4.12847   1 
   8  19   5 107.382 4.05657  -2 
  -8 -15   5 107.382 4.05657   1 
   7  19   5 52.5374 2.88008  -2 
  -7 -15   5 52.5374 2.88008   1 
   6  19   5 151.360 4.72045  -2 
  -6 -15   5 151.360 4.72045   1 
   5  19   5 10.8678 1.86177  -2 
  -5 -15   5 10.8678 1.86177   1 
   4  19   5 69.5821 3.00862  -2 
  -4 -15   5 69.5821 3.00862   1 
   3  19   5 88.1694 3.34886  -2 
  -3 -15   5 88.1694 3.34886   1 
   2  19   5 194.181 5.42022  -2 
  -2 -15   5 194.181 5.42022   1 
   1  19   5 92.6660 3.45442  -2 
  -1 -15   5 92.6660 3.45442   1 
   0  19   5 275.236 8.17285  -2 
   0 -15   5 275.236 8.17285   1 
  -1  19   5 34.3937 2.48998  -2 
   1 -15   5 34.3937 2.48998   1 
  -2  19   5 137.723 4.58416  -2 
   2 -15   5 137.723 4.58416   1 
  -3  19   5 46.0248 2.90678  -2 
   3 -15   5 46.0248 2.90678   1 
  -4  19   5 34.0834 3.21199  -2 
   4 -15   5 34.0834 3.21199   1 
  -5  19   5 10.2909 5.06536  -2 
   5 -15   5 10.2909 5.06536   1 
  10  18   5 58.7067 4.53166  -2 
 -10 -14   5 58.7067 4.53166   1 
   9  18   5 109.353 4.13092  -2 
  -9 -14   5 109.353 4.13092   1 
   8  18   5 0.22186 1.78714  -2 
  -8 -14   5 0.22186 1.78714   1 
   7  18   5 16.3000 1.99139  -2 
  -7 -14   5 16.3000 1.99139   1 
   6  18   5 1.04921 1.48869  -2 
  -6 -14   5 1.04921 1.48869   1 
   5  18   5 69.0857 2.68502  -2 
  -5 -14   5 69.0857 2.68502   1 
   4  18   5 17.5687 1.70163  -2 
  -4 -14   5 17.5687 1.70163   1 
   3  18   5 142.533 3.55470  -2 
  -3 -14   5 142.533 3.55470   1 
   2  18   5 46.5072 2.00805  -2 
  -2 -14   5 46.5072 2.00805   1 
   1  18   5 333.429 7.27792  -2 
  -1 -14   5 333.429 7.27792   1 
   0  18   5 35.0095 2.12290  -2 
   0 -14   5 35.0095 2.12290   1 
  -1  18   5 229.890 6.09721  -2 
   1 -14   5 229.890 6.09721   1 
  -2  18   5 3.37099 1.88007  -2 
   2 -14   5 3.37099 1.88007   1 
  -3  18   5 143.135 4.63443  -2 
   3 -14   5 143.135 4.63443   1 
  -4  18   5 33.8010 2.69683  -2 
   4 -14   5 33.8010 2.69683   1 
  -5  18   5 181.818 6.48585  -2 
   5 -14   5 181.818 6.48585   1 
  -6  18   5 0.12389 4.76491  -2 
   6 -14   5 0.12389 4.76491   1 
  11  17   5 7.13722 3.02831  -2 
 -11 -13   5 7.13722 3.02831   1 
  10  17   5 15.3890 2.15716  -2 
 -10 -13   5 15.3890 2.15716   1 
   9  17   5 60.5192 3.03138  -2 
  -9 -13   5 60.5192 3.03138   1 
   8  17   5 25.3200 2.19880  -2 
  -8 -13   5 25.3200 2.19880   1 
   7  17   5 20.1229 1.87037  -2 
  -7 -13   5 20.1229 1.87037   1 
   6  17   5 31.1899 1.95265  -2 
  -6 -13   5 31.1899 1.95265   1 
   5  17   5 0.29523 1.19471  -2 
  -5 -13   5 0.29523 1.19471   1 
   4  17   5 22.5883 1.54822  -2 
  -4 -13   5 22.5883 1.54822   1 
   3  17   5 15.1228 1.40890  -2 
  -3 -13   5 15.1228 1.40890   1 
   2  17   5 63.2800 2.17318  -2 
  -2 -13   5 63.2800 2.17318   1 
   1  17   5 8.45381 1.45262  -2 
  -1 -13   5 8.45381 1.45262   1 
   0  17   5 159.130 3.61685  -2 
   0 -13   5 159.130 3.61685   1 
  -1  17   5 22.6431 1.43216  -2 
   1 -13   5 22.6431 1.43216   1 
  -2  17   5 100.805 2.94314  -2 
   2 -13   5 100.805 2.94314   1 
  -3  17   5 54.9685 2.21717  -2 
   3 -13   5 54.9685 2.21717   1 
  -4  17   5 21.2832 1.65813  -2 
   4 -13   5 21.2832 1.65813   1 
  -5  17   5 8.04551 2.21045  -2 
   5 -13   5 8.04551 2.21045   1 
  -6  17   5 127.927 5.42206  -2 
   6 -13   5 127.927 5.42206   1 
  -7  17   5 -0.2017 4.77744  -2 
   7 -13   5 -0.2017 4.77744   1 
  11  16   5 12.5836 3.14282  -2 
 -11 -12   5 12.5836 3.14282   1 
  10  16   5 13.3312 2.00055  -2 
 -10 -12   5 13.3312 2.00055   1 
   9  16   5 31.0513 2.29707  -2 
  -9 -12   5 31.0513 2.29707   1 
   8  16   5 39.8974 2.27415  -2 
  -8 -12   5 39.8974 2.27415   1 
   7  16   5 48.9033 2.28447  -2 
  -7 -12   5 48.9033 2.28447   1 
   6  16   5 15.2675 1.41651  -2 
  -6 -12   5 15.2675 1.41651   1 
   5  16   5 51.8853 1.98471  -2 
  -5 -12   5 51.8853 1.98471   1 
   4  16   5 3.81928 1.23361  -2 
  -4 -12   5 3.81928 1.23361   1 
   3  16   5 150.809 3.21950  -2 
  -3 -12   5 150.809 3.21950   1 
   2  16   5 70.5781 1.78379  -2 
  -2 -12   5 70.5781 1.78379   1 
   1  16   5 70.5891 1.89314  -2 
  -1 -12   5 70.5891 1.89314   1 
   0  16   5 89.4652 2.20971  -2 
   0 -12   5 89.4652 2.20971   1 
  -1  16   5 90.1953 2.24989  -2 
   1 -12   5 90.1953 2.24989   1 
  -2  16   5 6.83704 1.15885  -2 
   2 -12   5 6.83704 1.15885   1 
  -3  16   5 110.327 2.90546  -2 
   3 -12   5 110.327 2.90546   1 
  -4  16   5 58.3588 2.28099  -2 
   4 -12   5 58.3588 2.28099   1 
  -5  16   5 99.2450 3.84904  -2 
   5 -12   5 99.2450 3.84904   1 
  -6  16   5 -0.1735 2.16330  -2 
   6 -12   5 -0.1735 2.16330   1 
  -7  16   5 91.9145 4.69344  -2 
   7 -12   5 91.9145 4.69344   1 
  -8  16   5 19.0643 5.64913  -2 
   8 -12   5 19.0643 5.64913   1 
   8 -12   5 11.7766 4.37698   2 
  12  15   5 19.5144 3.44321  -2 
 -12 -11   5 19.5144 3.44321   1 
  11  15   5 66.8630 3.76468  -2 
 -11 -11   5 66.8630 3.76468   1 
  10  15   5 2.63671 1.75018  -2 
 -10 -11   5 2.63671 1.75018   1 
   9  15   5 7.03397 1.57705  -2 
  -9 -11   5 7.03397 1.57705   1 
   8  15   5 82.5300 2.94522  -2 
  -8 -11   5 82.5300 2.94522   1 
   7  15   5 13.9547 1.45310  -2 
  -7 -11   5 13.9547 1.45310   1 
   6  15   5 112.665 2.96761  -2 
  -6 -11   5 112.665 2.96761   1 
   5  15   5 37.9252 1.53883  -2 
  -5 -11   5 37.9252 1.53883   1 
   4  15   5 125.434 2.61485  -2 
  -4 -11   5 125.434 2.61485   1 
   3  15   5 15.6323 1.05247  -2 
  -3 -11   5 15.6323 1.05247   1 
   2  15   5 31.6637 1.10692  -2 
  -2 -11   5 31.6637 1.10692   1 
   1  15   5 18.5558 0.92803  -2 
  -1 -11   5 18.5558 0.92803   1 
   0  15   5 95.2721 1.96490  -2 
   0 -11   5 95.2721 1.96490   1 
  -1  15   5 10.0205 0.92851  -2 
   1 -11   5 10.0205 0.92851   1 
  -2  15   5 14.4092 1.09287  -2 
   2 -11   5 14.4092 1.09287   1 
  -3  15   5 5.91597 1.02797  -2 
   3 -11   5 5.91597 1.02797   1 
  -4  15   5 49.0297 1.91027  -2 
   4 -11   5 49.0297 1.91027   1 
  -5  15   5 9.03505 1.44626  -2 
   5 -11   5 9.03505 1.44626   1 
  -6  15   5 46.1254 2.14323  -2 
   6 -11   5 46.1254 2.14323   1 
  -7  15   5 2.88120 1.46924  -2 
   7 -11   5 2.88120 1.46924   1 
  -8  15   5 70.5309 5.27450  -2 
   8 -11   5 70.5309 5.27450   1 
  12  14   5 42.3728 4.14366  -2 
 -12 -10   5 42.3728 4.14366   1 
  11  14   5 29.6391 2.82422  -2 
 -11 -10   5 29.6391 2.82422   1 
  10  14   5 9.52457 1.82135  -2 
 -10 -10   5 9.52457 1.82135   1 
   9  14   5 213.156 5.37155  -2 
  -9 -10   5 213.156 5.37155   1 
   8  14   5 55.2396 2.13807  -2 
  -8 -10   5 55.2396 2.13807   1 
   7  14   5 416.756 7.88830  -2 
  -7 -10   5 416.756 7.88830   1 
   6  14   5 76.6202 1.98954  -2 
  -6 -10   5 76.6202 1.98954   1 
   5  14   5 49.8492 1.55320  -2 
  -5 -10   5 49.8492 1.55320   1 
   4  14   5 58.4948 1.50716  -2 
  -4 -10   5 58.4948 1.50716   1 
   3  14   5 72.7946 1.67570  -2 
  -3 -10   5 72.7946 1.67570   1 
   2  14   5 129.889 2.54033  -2 
  -2 -10   5 129.889 2.54033   1 
   1  14   5 526.259 7.50768  -2 
  -1 -10   5 526.259 7.50768   1 
   0  14   5 161.436 2.77611  -2 
   0 -10   5 161.436 2.77611   1 
  -1  14   5 152.307 2.68609  -2 
   1 -10   5 152.307 2.68609   1 
  -2  14   5 260.724 4.14495  -2 
   2 -10   5 260.724 4.14495   1 
  -3  14   5 13.2350 1.02541  -2 
   3 -10   5 13.2350 1.02541   1 
  -4  14   5 12.9934 1.15829  -2 
   4 -10   5 12.9934 1.15829   1 
  -5  14   5 140.212 3.42901  -2 
   5 -10   5 140.212 3.42901   1 
  -6  14   5 64.1066 2.43944  -2 
   6 -10   5 64.1066 2.43944   1 
  -7  14   5 142.949 3.97464  -2 
   7 -10   5 142.949 3.97464   1 
  -8  14   5 90.3386 3.38919  -2 
   8 -10   5 90.3386 3.38919   1 
  -9  14   5 41.9757 6.56499  -2 
   9 -10   5 41.9757 6.56499   1 
  12  13   5 13.4850 2.58027  -2 
 -12  -9   5 13.4850 2.58027   1 
  11  13   5 16.3538 2.41161  -2 
 -11  -9   5 16.3538 2.41161   1 
  10  13   5 120.560 4.29580  -2 
 -10  -9   5 120.560 4.29580   1 
   9  13   5 -2.7841 1.29808  -2 
  -9  -9   5 -2.7841 1.29808   1 
   8  13   5 178.951 4.10999  -2 
  -8  -9   5 178.951 4.10999   1 
   7  13   5 29.9874 1.58215  -2 
  -7  -9   5 29.9874 1.58215   1 
   6  13   5 261.056 4.49895  -2 
  -6  -9   5 261.056 4.49895   1 
   5  13   5 9.24828 0.85708  -2 
  -5  -9   5 9.24828 0.85708   1 
   4  13   5 109.667 2.12120  -2 
  -4  -9   5 109.667 2.12120   1 
   3  13   5 139.886 2.42919  -2 
  -3  -9   5 139.886 2.42919   1 
   2  13   5 442.125 6.55693  -2 
  -2  -9   5 442.125 6.55693   1 
   1  13   5 219.096 3.71931  -2 
  -1  -9   5 219.096 3.71931   1 
   0  13   5 1443.83 18.4173  -2 
   0  -9   5 1443.83 18.4173   1 
  -1  13   5 142.008 2.49047  -2 
   1  -9   5 142.008 2.49047   1 
  -2  13   5 23.1431 0.99213  -2 
   2  -9   5 23.1431 0.99213   1 
  -3  13   5 18.8988 0.98054  -2 
   3  -9   5 18.8988 0.98054   1 
  -4  13   5 142.749 2.85236  -2 
   4  -9   5 142.749 2.85236   1 
  -5  13   5 85.5221 2.26108  -2 
   5  -9   5 85.5221 2.26108   1 
  -6  13   5 204.779 4.82967  -2 
   6  -9   5 204.779 4.82967   1 
  -7  13   5 64.6256 2.50021  -2 
   7  -9   5 64.6256 2.50021   1 
  -8  13   5 146.912 4.04394  -2 
   8  -9   5 146.912 4.04394   1 
  -9  13   5 -1.1667 2.56213  -2 
   9  -9   5 -1.1667 2.56213   1 
  12  12   5 5.22777 2.23453  -2 
 -12  -8   5 5.22777 2.23453   1 
  11  12   5 7.72516 2.15722  -2 
 -11  -8   5 7.72516 2.15722   1 
  10  12   5 63.4361 3.06483  -2 
 -10  -8   5 63.4361 3.06483   1 
   9  12   5 162.015 4.36700  -2 
  -9  -8   5 162.015 4.36700   1 
   8  12   5 38.6159 1.76259  -2 
  -8  -8   5 38.6159 1.76259   1 
   7  12   5 319.454 5.34814  -2 
  -7  -8   5 319.454 5.34814   1 
   6  12   5 91.6930 1.96731  -2 
  -6  -8   5 91.6930 1.96731   1 
   5  12   5 33.4682 1.14214  -2 
  -5  -8   5 33.4682 1.14214   1 
   4  12   5 183.971 2.95502  -2 
  -4  -8   5 183.971 2.95502   1 
   3  12   5 731.178 9.80423  -2 
  -3  -8   5 731.178 9.80423   1 
   2  12   5 130.917 2.35530  -2 
  -2  -8   5 130.917 2.35530   1 
   1  12   5 1026.87 14.7962  -2 
  -1  -8   5 1026.87 14.7962   1 
   0  12   5 153.779 2.76026  -2 
   0  -8   5 153.779 2.76026   1 
  -1  12   5 713.282 9.34429  -2 
   1  -8   5 713.282 9.34429   1 
  -2  12   5 76.4677 1.61779  -2 
   2  -8   5 76.4677 1.61779   1 
  -3  12   5 237.406 3.77996  -2 
   3  -8   5 237.406 3.77996   1 
  -4  12   5 99.7303 2.05344  -2 
   4  -8   5 99.7303 2.05344   1 
  -5  12   5 217.815 3.91112  -2 
   5  -8   5 217.815 3.91112   1 
  -6  12   5 13.8415 1.20360  -2 
   6  -8   5 13.8415 1.20360   1 
  -7  12   5 284.931 6.33249  -2 
   7  -8   5 284.931 6.33249   1 
  -8  12   5 16.7523 1.70187  -2 
   8  -8   5 16.7523 1.70187   1 
  -9  12   5 7.21459 1.68936  -2 
   9  -8   5 7.21459 1.68936   1 
 -10  12   5 19.4702 5.50478  -2 
  10  -8   5 19.4702 5.50478   1 
  13  11   5 5.81932 2.73111  -2 
 -13  -7   5 5.81932 2.73111   1 
  12  11   5 1.73562 2.60808  -2 
 -12  -7   5 1.73562 2.60808   1 
  11  11   5 43.9912 3.09842  -2 
 -11  -7   5 43.9912 3.09842   1 
  10  11   5 105.659 3.92678  -2 
 -10  -7   5 105.659 3.92678   1 
   9  11   5 0.97888 1.32620  -2 
  -9  -7   5 0.97888 1.32620   1 
   8  11   5 49.1132 1.77351  -2 
  -8  -7   5 49.1132 1.77351   1 
   7  11   5 84.3621 2.03999  -2 
  -7  -7   5 84.3621 2.03999   1 
   6  11   5 157.264 2.78481  -2 
  -6  -7   5 157.264 2.78481   1 
   5  11   5 211.377 3.31173  -2 
  -5  -7   5 211.377 3.31173   1 
   4  11   5 247.551 3.72052  -2 
  -4  -7   5 247.551 3.72052   1 
   3  11   5 319.163 4.34247  -2 
  -3  -7   5 319.163 4.34247   1 
   2  11   5 63.2563 1.26578  -2 
  -2  -7   5 63.2563 1.26578   1 
   1  11   5 231.595 3.27966  -2 
  -1  -7   5 231.595 3.27966   1 
   0  11   5 485.687 6.35849  -2 
   0  -7   5 485.687 6.35849   1 
  -1  11   5 258.020 3.59195  -2 
   1  -7   5 258.020 3.59195   1 
  -2  11   5 32.2727 0.89560  -2 
   2  -7   5 32.2727 0.89560   1 
  -3  11   5 490.912 7.03077  -2 
   3  -7   5 490.912 7.03077   1 
  -4  11   5 268.107 4.21039  -2 
   4  -7   5 268.107 4.21039   1 
  -5  11   5 14.2428 0.99840  -2 
   5  -7   5 14.2428 0.99840   1 
  -6  11   5 59.1697 1.74117  -2 
   6  -7   5 59.1697 1.74117   1 
  -7  11   5 155.153 3.60969  -2 
   7  -7   5 155.153 3.60969   1 
  -8  11   5 148.220 3.99263  -2 
   8  -7   5 148.220 3.99263   1 
  -9  11   5 169.792 4.51535  -2 
   9  -7   5 169.792 4.51535   1 
 -10  11   5 64.8177 4.15598  -2 
  10  -7   5 64.8177 4.15598   1 
  13  10   5 1.17854 2.50973  -2 
 -13  -6   5 1.17854 2.50973   1 
  12  10   5 18.2804 2.59138  -2 
 -12  -6   5 18.2804 2.59138   1 
  11  10   5 80.3680 3.54807  -2 
 -11  -6   5 80.3680 3.54807   1 
  10  10   5 57.1602 2.89680  -2 
 -10  -6   5 57.1602 2.89680   1 
   9  10   5 27.2773 1.81876  -2 
  -9  -6   5 27.2773 1.81876   1 
   8  10   5 2.69367 0.90648  -2 
  -8  -6   5 2.69367 0.90648   1 
   7  10   5 82.4509 1.86595  -2 
  -7  -6   5 82.4509 1.86595   1 
   6  10   5 7.12944 0.77915  -2 
  -6  -6   5 7.12944 0.77915   1 
   5  10   5 112.760 2.04507  -2 
  -5  -6   5 112.760 2.04507   1 
   4  10   5 285.501 3.94527  -2 
  -4  -6   5 285.501 3.94527   1 
   3  10   5 200.214 2.75138  -2 
  -3  -6   5 200.214 2.75138   1 
   2  10   5 87.1319 1.55629  -2 
  -2  -6   5 87.1319 1.55629   1 
   1  10   5 7.25823 0.51629  -2 
  -1  -6   5 7.25823 0.51629   1 
   0  10   5 47.1936 1.00472  -2 
   0  -6   5 47.1936 1.00472   1 
  -1  10   5 16.4816 0.67223  -2 
   1  -6   5 16.4816 0.67223   1 
  -2  10   5 49.4211 1.13063  -2 
   2  -6   5 49.4211 1.13063   1 
  -3  10   5 665.126 8.73780  -2 
   3  -6   5 665.126 8.73780   1 
  -4  10   5 68.6702 1.54962  -2 
   4  -6   5 68.6702 1.54962   1 
  -5  10   5 193.959 3.27754  -2 
   5  -6   5 193.959 3.27754   1 
  -6  10   5 54.6200 1.63214  -2 
   6  -6   5 54.6200 1.63214   1 
  -7  10   5 37.6891 1.56459  -2 
   7  -6   5 37.6891 1.56459   1 
  -8  10   5 10.8633 1.52559  -2 
   8  -6   5 10.8633 1.52559   1 
  -9  10   5 37.1433 2.09984  -2 
   9  -6   5 37.1433 2.09984   1 
 -10  10   5 32.2627 2.22487  -2 
  10  -6   5 32.2627 2.22487   1 
 -11  10   5 152.260 11.0802  -2 
  11  -6   5 152.260 11.0802   1 
  13   9   5 5.95295 2.68937  -2 
 -13  -5   5 5.95295 2.68937   1 
  12   9   5 44.5978 2.90394  -2 
 -12  -5   5 44.5978 2.90394   1 
  11   9   5 4.21889 1.88084  -2 
 -11  -5   5 4.21889 1.88084   1 
  10   9   5 87.0375 3.51812  -2 
 -10  -5   5 87.0375 3.51812   1 
   9   9   5 93.0315 3.03579  -2 
  -9  -5   5 93.0315 3.03579   1 
   8   9   5 69.6021 2.02280  -2 
  -8  -5   5 69.6021 2.02280   1 
   7   9   5 48.3667 1.40749  -2 
  -7  -5   5 48.3667 1.40749   1 
   6   9   5 310.813 4.59482  -2 
  -6  -5   5 310.813 4.59482   1 
   5   9   5 310.508 4.49575  -2 
  -5  -5   5 310.508 4.49575   1 
   4   9   5 290.296 3.80141  -2 
  -4  -5   5 290.296 3.80141   1 
   3   9   5 141.079 2.12388  -2 
  -3  -5   5 141.079 2.12388   1 
   2   9   5 93.3257 1.58821  -2 
  -2  -5   5 93.3257 1.58821   1 
   1   9   5 506.879 6.29264  -2 
  -1  -5   5 506.879 6.29264   1 
   0   9   5 137.699 2.13946  -2 
   0  -5   5 137.699 2.13946   1 
  -1   9   5 701.163 9.30761  -2 
   1  -5   5 701.163 9.30761   1 
  -2   9   5 21.8379 0.74937  -2 
   2  -5   5 21.8379 0.74937   1 
  -3   9   5 457.334 5.49852  -2 
   3  -5   5 457.334 5.49852   1 
  -4   9   5 276.394 3.95256  -2 
   4  -5   5 276.394 3.95256   1 
  -5   9   5 475.812 6.91526  -2 
   5  -5   5 475.812 6.91526   1 
  -6   9   5 17.3349 1.00465  -2 
   6  -5   5 17.3349 1.00465   1 
  -7   9   5 153.266 3.08948  -2 
   7  -5   5 153.266 3.08948   1 
  -8   9   5 118.248 3.02872  -2 
   8  -5   5 118.248 3.02872   1 
  -9   9   5 196.251 4.89738  -2 
   9  -5   5 196.251 4.89738   1 
 -10   9   5 51.0658 2.33423  -2 
  10  -5   5 51.0658 2.33423   1 
 -11   9   5 27.7075 3.97547  -2 
  11  -5   5 27.7075 3.97547   1 
  13   8   5 86.9130 4.57615  -2 
 -13  -4   5 86.9130 4.57615   1 
  12   8   5 -3.2248 2.22587  -2 
 -12  -4   5 -3.2248 2.22587   1 
  11   8   5 6.09842 1.78672  -2 
 -11  -4   5 6.09842 1.78672   1 
  10   8   5 40.9260 2.56916  -2 
 -10  -4   5 40.9260 2.56916   1 
   9   8   5 264.932 6.11234  -2 
  -9  -4   5 264.932 6.11234   1 
   8   8   5 22.1843 1.28421  -2 
  -8  -4   5 22.1843 1.28421   1 
   7   8   5 485.612 7.30748  -2 
  -7  -4   5 485.612 7.30748   1 
   6   8   5 8.80429 0.78687  -2 
  -6  -4   5 8.80429 0.78687   1 
   5   8   5 72.2832 1.41752  -2 
  -5  -4   5 72.2832 1.41752   1 
   4   8   5 10.7063 0.61643  -2 
  -4  -4   5 10.7063 0.61643   1 
   3   8   5 1071.98 13.2298  -2 
  -3  -4   5 1071.98 13.2298   1 
   2   8   5 223.580 3.17866  -2 
  -2  -4   5 223.580 3.17866   1 
   1   8   5 577.380 7.45355  -2 
  -1  -4   5 577.380 7.45355   1 
   0   8   5 5.61344 0.45272  -2 
   0  -4   5 5.61344 0.45272   1 
  -1   8   5 205.941 2.97426  -2 
   1  -4   5 205.941 2.97426   1 
  -2   8   5 276.603 3.92390  -2 
   2  -4   5 276.603 3.92390   1 
  -3   8   5 63.1318 1.15419  -2 
   3  -4   5 63.1318 1.15419   1 
  -4   8   5 262.022 3.42889  -2 
   4  -4   5 262.022 3.42889   1 
  -5   8   5 442.946 6.44089  -2 
   5  -4   5 442.946 6.44089   1 
  -6   8   5 2.77192 0.78088  -2 
   6  -4   5 2.77192 0.78088   1 
  -7   8   5 6.95626 0.95387  -2 
   7  -4   5 6.95626 0.95387   1 
  -8   8   5 73.6907 1.96246  -2 
   8  -4   5 73.6907 1.96246   1 
  -9   8   5 56.7187 2.35034  -2 
   9  -4   5 56.7187 2.35034   1 
 -10   8   5 10.0802 1.64025  -2 
  10  -4   5 10.0802 1.64025   1 
 -11   8   5 100.805 3.65872  -2 
  11  -4   5 100.805 3.65872   1 
  13   7   5 31.7505 3.29627  -2 
 -13  -3   5 31.7505 3.29627   1 
  12   7   5 14.6576 2.24872  -2 
 -12  -3   5 14.6576 2.24872   1 
  11   7   5 73.3999 3.04027  -2 
 -11  -3   5 73.3999 3.04027   1 
  10   7   5 502.034 10.6698  -2 
 -10  -3   5 502.034 10.6698   1 
   9   7   5 25.1373 1.62725  -2 
  -9  -3   5 25.1373 1.62725   1 
   8   7   5 364.279 6.41731  -2 
  -8  -3   5 364.279 6.41731   1 
   7   7   5 69.0989 1.83905  -2 
  -7  -3   5 69.0989 1.83905   1 
   6   7   5 536.073 7.85990  -2 
  -6  -3   5 536.073 7.85990   1 
   5   7   5 17.7947 0.73845  -2 
  -5  -3   5 17.7947 0.73845   1 
   4   7   5 1446.75 17.7656  -2 
  -4  -3   5 1446.75 17.7656   1 
   3   7   5 423.050 5.72505  -2 
  -3  -3   5 423.050 5.72505   1 
   2   7   5 2170.81 26.8408  -2 
  -2  -3   5 2170.81 26.8408   1 
   1   7   5 387.486 4.87384  -2 
  -1  -3   5 387.486 4.87384   1 
   0   7   5 146.020 2.14029  -2 
   0  -3   5 146.020 2.14029   1 
  -1   7   5 318.932 4.63498  -2 
   1  -3   5 318.932 4.63498   1 
  -2   7   5 456.085 6.14960  -2 
   2  -3   5 456.085 6.14960   1 
  -3   7   5 948.494 11.9020  -2 
   3  -3   5 948.494 11.9020   1 
  -4   7   5 137.692 1.95010  -2 
   4  -3   5 137.692 1.95010   1 
  -5   7   5 740.805 9.38898  -2 
   5  -3   5 740.805 9.38898   1 
  -6   7   5 98.8628 1.95836  -2 
   6  -3   5 98.8628 1.95836   1 
  -7   7   5 267.063 4.17344  -2 
   7  -3   5 267.063 4.17344   1 
  -8   7   5 68.2715 1.85759  -2 
   8  -3   5 68.2715 1.85759   1 
  -9   7   5 131.923 3.31644  -2 
   9  -3   5 131.923 3.31644   1 
 -10   7   5 50.0415 2.35911  -2 
  10  -3   5 50.0415 2.35911   1 
 -11   7   5 113.453 3.94596  -2 
  11  -3   5 113.453 3.94596   1 
 -12   7   5 38.5847 6.55959  -2 
  12  -3   5 38.5847 6.55959   1 
  13   6   5 16.2268 2.95645  -2 
 -13  -2   5 16.2268 2.95645   1 
  12   6   5 0.14801 1.88155  -2 
 -12  -2   5 0.14801 1.88155   1 
  11   6   5 185.330 5.07730  -2 
 -11  -2   5 185.330 5.07730   1 
  10   6   5 71.3258 2.85091  -2 
 -10  -2   5 71.3258 2.85091   1 
   9   6   5 255.071 5.37105  -2 
  -9  -2   5 255.071 5.37105   1 
   8   6   5 28.3117 1.39818  -2 
  -8  -2   5 28.3117 1.39818   1 
   7   6   5 260.713 4.58408  -2 
  -7  -2   5 260.713 4.58408   1 
   6   6   5 41.6759 1.30009  -2 
  -6  -2   5 41.6759 1.30009   1 
   5   6   5 401.969 5.61606  -2 
  -5  -2   5 401.969 5.61606   1 
   4   6   5 245.013 3.34463  -2 
  -4  -2   5 245.013 3.34463   1 
   3   6   5 2030.01 24.8253  -2 
  -3  -2   5 2030.01 24.8253   1 
   2   6   5 29.2148 0.60596  -2 
  -2  -2   5 29.2148 0.60596   1 
   1   6   5 501.838 5.93860  -2 
  -1  -2   5 501.838 5.93860   1 
   0   6   5 602.842 7.12257  -2 
   0  -2   5 602.842 7.12257   1 
  -1   6   5 399.463 5.08776  -2 
   1  -2   5 399.463 5.08776   1 
  -2   6   5 841.234 11.7067  -2 
   2  -2   5 841.234 11.7067   1 
  -3   6   5 21.0973 0.70867  -2 
   3  -2   5 21.0973 0.70867   1 
  -4   6   5 287.607 3.76387  -2 
   4  -2   5 287.607 3.76387   1 
  -5   6   5 645.591 7.80990  -2 
   5  -2   5 645.591 7.80990   1 
  -6   6   5 316.675 4.83974  -2 
   6  -2   5 316.675 4.83974   1 
  -7   6   5 15.8587 0.99128  -2 
   7  -2   5 15.8587 0.99128   1 
  -8   6   5 104.476 2.39338  -2 
   8  -2   5 104.476 2.39338   1 
  -9   6   5 3.48385 1.20048  -2 
   9  -2   5 3.48385 1.20048   1 
 -10   6   5 152.902 4.11387  -2 
  10  -2   5 152.902 4.11387   1 
 -11   6   5 106.295 3.45663  -2 
  11  -2   5 106.295 3.45663   1 
 -12   6   5 39.6091 2.71953  -2 
  12  -2   5 39.6091 2.71953   1 
  13   5   5 50.7502 3.82069  -2 
 -13  -1   5 50.7502 3.82069   1 
  12   5   5 17.2951 2.33168  -2 
 -12  -1   5 17.2951 2.33168   1 
  11   5   5 67.7878 2.92196  -2 
 -11  -1   5 67.7878 2.92196   1 
  10   5   5 768.662 13.7327  -2 
 -10  -1   5 768.662 13.7327   1 
   9   5   5 167.994 4.31268  -2 
  -9  -1   5 167.994 4.31268   1 
   8   5   5 68.8589 1.99731  -2 
  -8  -1   5 68.8589 1.99731   1 
   7   5   5 37.0526 1.38097  -2 
  -7  -1   5 37.0526 1.38097   1 
   6   5   5 159.491 2.79970  -2 
  -6  -1   5 159.491 2.79970   1 
   5   5   5 15.8133 0.78487  -2 
  -5  -1   5 15.8133 0.78487   1 
   4   5   5 2541.18 32.6311  -2 
  -4  -1   5 2541.18 32.6311   1 
   3   5   5 30.8805 0.67573  -2 
  -3  -1   5 30.8805 0.67573   1 
   2   5   5 764.855 9.14968  -2 
  -2  -1   5 764.855 9.14968   1 
   1   5   5 23.5967 0.49601  -2 
  -1  -1   5 23.5967 0.49601   1 
   0   5   5 397.952 4.94321  -2 
   0  -1   5 397.952 4.94321   1 
  -1   5   5 389.726 5.00465  -2 
   1  -1   5 389.726 5.00465   1 
  -2   5   5 1866.33 24.1364  -2 
   2  -1   5 1866.33 24.1364   1 
  -3   5   5 366.634 5.02730  -2 
   3  -1   5 366.634 5.02730   1 
  -4   5   5 662.850 8.48213  -2 
   4  -1   5 662.850 8.48213   1 
  -5   5   5 133.458 1.94331  -2 
   5  -1   5 133.458 1.94331   1 
  -6   5   5 312.071 4.46108  -2 
   6  -1   5 312.071 4.46108   1 
  -7   5   5 216.738 3.62445  -2 
   7  -1   5 216.738 3.62445   1 
  -8   5   5 96.7867 2.26881  -2 
   8  -1   5 96.7867 2.26881   1 
  -9   5   5 29.0056 1.41934  -2 
   9  -1   5 29.0056 1.41934   1 
 -10   5   5 120.966 3.52394  -2 
  10  -1   5 120.966 3.52394   1 
 -11   5   5 14.6200 1.75457  -2 
  11  -1   5 14.6200 1.75457   1 
 -12   5   5 137.616 4.41920  -2 
  12  -1   5 137.616 4.41920   1 
  13   4   5 10.5595 2.87944  -2 
 -13   0   5 10.5595 2.87944   1 
  12   4   5 46.8392 2.95828  -2 
 -12   0   5 46.8392 2.95828   1 
  11   4   5 266.648 6.53898  -2 
 -11   0   5 266.648 6.53898   1 
  10   4   5 175.356 4.69584  -2 
 -10   0   5 175.356 4.69584   1 
   9   4   5 111.658 2.81279  -2 
  -9   0   5 111.658 2.81279   1 
   8   4   5 55.8028 1.93127  -2 
  -8   0   5 55.8028 1.93127   1 
   7   4   5 99.9952 2.26150  -2 
  -7   0   5 99.9952 2.26150   1 
   6   4   5 123.701 2.31210  -2 
  -6   0   5 123.701 2.31210   1 
   5   4   5 969.448 13.6167  -2 
  -5   0   5 969.448 13.6167   1 
   4   4   5 74.4013 1.34499  -2 
  -4   0   5 74.4013 1.34499   1 
   3   4   5 465.641 5.45530  -2 
  -3   0   5 465.641 5.45530   1 
   2   4   5 279.640 3.78656  -2 
  -2   0   5 279.640 3.78656   1 
   1   4   5 175.805 2.82483  -2 
  -1   0   5 175.805 2.82483   1 
   0   4   5 126.621 2.79916  -2 
   0   0   5 126.621 2.79916   1 
  -1   4   5 1932.64 25.2634  -2 
   1   0   5 1932.64 25.2634   1 
  -2   4   5 346.479 4.49218  -2 
   2   0   5 346.479 4.49218   1 
  -3   4   5 302.071 4.44717  -2 
   3   0   5 302.071 4.44717   1 
  -4   4   5 243.654 3.54633  -2 
   4   0   5 243.654 3.54633   1 
  -5   4   5 695.293 8.16826  -2 
   5   0   5 695.293 8.16826   1 
  -6   4   5 224.785 3.08981  -2 
   6   0   5 224.785 3.08981   1 
  -7   4   5 55.5200 1.47767  -2 
   7   0   5 55.5200 1.47767   1 
  -8   4   5 283.761 4.85828  -2 
   8   0   5 283.761 4.85828   1 
  -9   4   5 126.976 2.80584  -2 
   9   0   5 126.976 2.80584   1 
 -10   4   5 148.760 3.98153  -2 
  10   0   5 148.760 3.98153   1 
 -11   4   5 120.287 3.60544  -2 
  11   0   5 120.287 3.60544   1 
 -12   4   5 110.595 3.84755  -2 
  12   0   5 110.595 3.84755   1 
  13   3   5 22.1329 3.13247  -2 
 -13   1   5 22.1329 3.13247   1 
  12   3   5 1.83642 2.07150  -2 
 -12   1   5 1.83642 2.07150   1 
  11   3   5 15.5984 1.94100  -2 
 -11   1   5 15.5984 1.94100   1 
  10   3   5 457.975 9.75656  -2 
 -10   1   5 457.975 9.75656   1 
   9   3   5 69.9812 2.19912  -2 
  -9   1   5 69.9812 2.19912   1 
   8   3   5 17.0501 1.20986  -2 
  -8   1   5 17.0501 1.20986   1 
   7   3   5 216.734 3.93948  -2 
  -7   1   5 216.734 3.93948   1 
   6   3   5 222.610 3.86890  -2 
  -6   1   5 222.610 3.86890   1 
   5   3   5 25.4122 0.88827  -2 
  -5   1   5 25.4122 0.88827   1 
   4   3   5 423.701 5.78145  -2 
  -4   1   5 423.701 5.78145   1 
   3   3   5 86.5495 1.26346  -2 
  -3   1   5 86.5495 1.26346   1 
   2   3   5 18.6074 0.45794  -2 
  -2   1   5 18.6074 0.45794   1 
   1   3   5 902.742 17.2891  -2 
  -1   1   5 902.742 17.2891   1 
  -1   3   5 93.7184 1.77645  -2 
   1   1   5 93.7184 1.77645   1 
  -2   3   5 284.312 3.92342  -2 
   2   1   5 284.312 3.92342   1 
  -3   3   5 72.3433 1.34196  -2 
   3   1   5 72.3433 1.34196   1 
  -4   3   5 41.1743 0.97220  -2 
   4   1   5 41.1743 0.97220   1 
  -5   3   5 118.884 1.97274  -2 
   5   1   5 118.884 1.97274   1 
  -6   3   5 175.132 2.51364  -2 
   6   1   5 175.132 2.51364   1 
  -7   3   5 4.13192 0.78457  -2 
   7   1   5 4.13192 0.78457   1 
  -8   3   5 137.900 2.67307  -2 
   8   1   5 137.900 2.67307   1 
  -9   3   5 29.9413 1.40210  -2 
   9   1   5 29.9413 1.40210   1 
 -10   3   5 133.509 3.37314  -2 
  10   1   5 133.509 3.37314   1 
 -11   3   5 39.3564 2.14731  -2 
  11   1   5 39.3564 2.14731   1 
 -12   3   5 40.4632 2.43166  -2 
  12   1   5 40.4632 2.43166   1 
 -13   3   5 6.35636 5.25242  -2 
  13   1   5 6.35636 5.25242   1 
  13   2   5 8.65401 2.84370  -2 
 -13   2   5 8.65401 2.84370   1 
  12   2   5 93.3822 3.96010  -2 
 -12   2   5 93.3822 3.96010   1 
  11   2   5 83.4699 3.26162  -2 
 -11   2   5 83.4699 3.26162   1 
  10   2   5 37.8923 2.24490  -2 
 -10   2   5 37.8923 2.24490   1 
   9   2   5 22.5307 1.47799  -2 
  -9   2   5 22.5307 1.47799   1 
   8   2   5 216.691 4.18602  -2 
  -8   2   5 216.691 4.18602   1 
   7   2   5 89.5345 2.10316  -2 
  -7   2   5 89.5345 2.10316   1 
   6   2   5 95.7350 1.93299  -2 
  -6   2   5 95.7350 1.93299   1 
   5   2   5 108.104 1.87090  -2 
  -5   2   5 108.104 1.87090   1 
   4   2   5 72.9430 1.24862  -2 
  -4   2   5 72.9430 1.24862   1 
   3   2   5 981.519 12.3591  -2 
  -3   2   5 981.519 12.3591   1 
   2   2   5 174.035 2.54915  -2 
  -2   2   5 174.035 2.54915   1 
   1   2   5 197.888 4.54809  -2 
  -1   2   5 197.888 4.54809   1 
  -1   2   5 197.412 4.59989  -2 
   1   2   5 197.412 4.59989   1 
  -2   2   5 176.401 2.37753  -2 
   2   2   5 176.401 2.37753   1 
  -3   2   5 989.998 14.5606  -2 
   3   2   5 989.998 14.5606   1 
  -4   2   5 73.5748 1.56094  -2 
   4   2   5 73.5748 1.56094   1 
  -5   2   5 110.848 1.96565  -2 
   5   2   5 110.848 1.96565   1 
  -6   2   5 96.7755 1.64306  -2 
   6   2   5 96.7755 1.64306   1 
  -7   2   5 93.4810 2.06621  -2 
   7   2   5 93.4810 2.06621   1 
  -8   2   5 219.119 3.93553  -2 
   8   2   5 219.119 3.93553   1 
  -9   2   5 21.4086 1.25588  -2 
   9   2   5 21.4086 1.25588   1 
 -10   2   5 37.8368 1.80429  -2 
  10   2   5 37.8368 1.80429   1 
 -11   2   5 79.8320 2.85727  -2 
  11   2   5 79.8320 2.85727   1 
 -12   2   5 96.7539 3.52214  -2 
  12   2   5 96.7539 3.52214   1 
 -13   2   5 10.2449 2.34947  -2 
  13   2   5 10.2449 2.34947   1 
  13   1   5 9.23727 2.93139  -2 
 -13   3   5 9.23727 2.93139   1 
  12   1   5 35.2497 2.79394  -2 
 -12   3   5 35.2497 2.79394   1 
  11   1   5 35.9817 2.38806  -2 
 -11   3   5 35.9817 2.38806   1 
  10   1   5 141.121 4.13257  -2 
 -10   3   5 141.121 4.13257   1 
   9   1   5 30.0805 1.75123  -2 
  -9   3   5 30.0805 1.75123   1 
   8   1   5 133.479 2.78588  -2 
  -8   3   5 133.479 2.78588   1 
   7   1   5 3.42169 0.88888  -2 
  -7   3   5 3.42169 0.88888   1 
   6   1   5 175.707 3.19711  -2 
  -6   3   5 175.707 3.19711   1 
   5   1   5 117.063 2.10175  -2 
  -5   3   5 117.063 2.10175   1 
   4   1   5 38.6796 0.90029  -2 
  -4   3   5 38.6796 0.90029   1 
   3   1   5 70.4468 1.09371  -2 
  -3   3   5 70.4468 1.09371   1 
   2   1   5 286.113 3.68144  -2 
  -2   3   5 286.113 3.68144   1 
   1   1   5 89.8671 1.88272  -2 
  -1   3   5 89.8671 1.88272   1 
  -1   1   5 912.925 15.5531  -2 
   1   3   5 912.925 15.5531   1 
  -2   1   5 19.5699 0.54757  -2 
   2   3   5 19.5699 0.54757   1 
  -3   1   5 84.0075 1.39494  -2 
   3   3   5 84.0075 1.39494   1 
  -4   1   5 421.754 6.54733  -2 
   4   3   5 421.754 6.54733   1 
  -5   1   5 26.2106 0.94766  -2 
   5   3   5 26.2106 0.94766   1 
  -6   1   5 226.864 3.16729  -2 
   6   3   5 226.864 3.16729   1 
  -7   1   5 219.813 3.84008  -2 
   7   3   5 219.813 3.84008   1 
  -8   1   5 16.6740 1.04268  -2 
   8   3   5 16.6740 1.04268   1 
  -9   1   5 68.4795 1.93953  -2 
   9   3   5 68.4795 1.93953   1 
 -10   1   5 434.570 8.82631  -2 
  10   3   5 434.570 8.82631   1 
 -11   1   5 17.0434 1.71674  -2 
  11   3   5 17.0434 1.71674   1 
 -12   1   5 0.96604 1.67860  -2 
  12   3   5 0.96604 1.67860   1 
 -13   1   5 24.0015 2.72888  -2 
  13   3   5 24.0015 2.72888   1 
  12   0   5 115.393 4.51128  -2 
 -12   4   5 115.393 4.51128   1 
  11   0   5 115.261 4.25245  -2 
 -11   4   5 115.261 4.25245   1 
  10   0   5 154.634 4.40998  -2 
 -10   4   5 154.634 4.40998   1 
   9   0   5 126.233 3.33304  -2 
  -9   4   5 126.233 3.33304   1 
   8   0   5 280.083 4.83995  -2 
  -8   4   5 280.083 4.83995   1 
   7   0   5 55.0144 1.54758  -2 
  -7   4   5 55.0144 1.54758   1 
   6   0   5 219.665 3.61710  -2 
  -6   4   5 219.665 3.61710   1 
   5   0   5 683.689 8.76857  -2 
  -5   4   5 683.689 8.76857   1 
   4   0   5 240.774 3.65788  -2 
  -4   4   5 240.774 3.65788   1 
   3   0   5 296.029 3.89969  -2 
  -3   4   5 296.029 3.89969   1 
   2   0   5 337.337 4.34014  -2 
  -2   4   5 337.337 4.34014   1 
   1   0   5 1983.42 27.1130  -2 
  -1   4   5 1983.42 27.1130   1 
   0   0   5 131.537 2.22190  -2 
   0   4   5 131.537 2.22190   1 
  -1   0   5 175.143 2.39346  -2 
   1   4   5 175.143 2.39346   1 
  -2   0   5 277.693 3.45389  -2 
   2   4   5 277.693 3.45389   1 
  -3   0   5 451.562 6.08837  -2 
   3   4   5 451.562 6.08837   1 
  -4   0   5 76.2393 1.50050  -2 
   4   4   5 76.2393 1.50050   1 
  -5   0   5 991.462 12.5748  -2 
   5   4   5 991.462 12.5748   1 
  -6   0   5 124.770 1.97189  -2 
   6   4   5 124.770 1.97189   1 
  -7   0   5 98.4959 2.14115  -2 
   7   4   5 98.4959 2.14115   1 
  -8   0   5 54.8578 1.62102  -2 
   8   4   5 54.8578 1.62102   1 
  -9   0   5 112.780 2.72856  -2 
   9   4   5 112.780 2.72856   1 
 -10   0   5 169.032 3.91362  -2 
  10   4   5 169.032 3.91362   1 
 -11   0   5 255.718 6.53431  -2 
  11   4   5 255.718 6.53431   1 
 -12   0   5 48.1906 2.36201  -2 
  12   4   5 48.1906 2.36201   1 
 -13   0   5 12.3907 2.18144  -2 
  13   4   5 12.3907 2.18144   1 
  12  -1   5 136.686 4.98035  -2 
 -12   5   5 136.686 4.98035   1 
  11  -1   5 15.9318 2.31377  -2 
 -11   5   5 15.9318 2.31377   1 
  10  -1   5 123.134 3.90964  -2 
 -10   5   5 123.134 3.90964   1 
   9  -1   5 28.8893 1.77395  -2 
  -9   5   5 28.8893 1.77395   1 
   8  -1   5 95.7255 2.30266  -2 
  -8   5   5 95.7255 2.30266   1 
   7  -1   5 213.404 3.79919  -2 
  -7   5   5 213.404 3.79919   1 
   6  -1   5 303.968 4.77958  -2 
  -6   5   5 303.968 4.77958   1 
   5  -1   5 131.892 2.22228  -2 
  -5   5   5 131.892 2.22228   1 
   4  -1   5 641.719 8.57115  -2 
  -4   5   5 641.719 8.57115   1 
   3  -1   5 358.332 4.64124  -2 
  -3   5   5 358.332 4.64124   1 
   2  -1   5 1844.91 21.7429  -2 
  -2   5   5 1844.91 21.7429   1 
   1  -1   5 403.771 4.89557  -2 
  -1   5   5 403.771 4.89557   1 
   0  -1   5 407.167 5.06620  -2 
   0   5   5 407.167 5.06620   1 
  -1  -1   5 23.8226 0.47395  -2 
   1   5   5 23.8226 0.47395   1 
  -2  -1   5 760.070 8.66052  -2 
   2   5   5 760.070 8.66052   1 
  -3  -1   5 30.1258 0.76173  -2 
   3   5   5 30.1258 0.76173   1 
  -4  -1   5 2568.83 33.0216  -2 
   4   5   5 2568.83 33.0216   1 
  -5  -1   5 14.1824 0.77131  -2 
   5   5   5 14.1824 0.77131   1 
  -6  -1   5 166.141 2.61298  -2 
   6   5   5 166.141 2.61298   1 
  -7  -1   5 38.0390 1.47360  -2 
   7   5   5 38.0390 1.47360   1 
  -8  -1   5 66.4916 1.78191  -2 
   8   5   5 66.4916 1.78191   1 
  -9  -1   5 166.021 3.53249  -2 
   9   5   5 166.021 3.53249   1 
 -10  -1   5 773.958 12.4716  -2 
  10   5   5 773.958 12.4716   1 
 -11  -1   5 63.4375 2.55621  -2 
  11   5   5 63.4375 2.55621   1 
 -12  -1   5 16.1938 1.75103  -2 
  12   5   5 16.1938 1.75103   1 
 -13  -1   5 44.0485 3.10611  -2 
  13   5   5 44.0485 3.10611   1 
  12  -2   5 42.7216 3.64622  -2 
 -12   6   5 42.7216 3.64622   1 
  11  -2   5 101.128 4.10210  -2 
 -11   6   5 101.128 4.10210   1 
  10  -2   5 162.928 4.65564  -2 
 -10   6   5 162.928 4.65564   1 
   9  -2   5 2.44552 1.54867  -2 
  -9   6   5 2.44552 1.54867   1 
   8  -2   5 102.146 2.67489  -2 
  -8   6   5 102.146 2.67489   1 
   7  -2   5 16.4323 1.11126  -2 
  -7   6   5 16.4323 1.11126   1 
   6  -2   5 312.436 4.92357  -2 
  -6   6   5 312.436 4.92357   1 
   5  -2   5 633.439 9.10188  -2 
  -5   6   5 633.439 9.10188   1 
   4  -2   5 284.153 4.06998  -2 
  -4   6   5 284.153 4.06998   1 
   3  -2   5 22.5924 0.68592  -2 
  -3   6   5 22.5924 0.68592   1 
   2  -2   5 833.449 10.3380  -2 
  -2   6   5 833.449 10.3380   1 
   1  -2   5 403.184 4.91548  -2 
  -1   6   5 403.184 4.91548   1 
   0  -2   5 618.958 7.11510  -2 
   0   6   5 618.958 7.11510   1 
  -1  -2   5 507.885 6.12764  -2 
   1   6   5 507.885 6.12764   1 
  -2  -2   5 27.9079 0.61302  -2 
   2   6   5 27.9079 0.61302   1 
  -3  -2   5 2005.19 24.3840  -2 
   3   6   5 2005.19 24.3840   1 
  -4  -2   5 245.330 3.57578  -2 
   4   6   5 245.330 3.57578   1 
  -5  -2   5 412.250 5.01922  -2 
   5   6   5 412.250 5.01922   1 
  -6  -2   5 39.7815 0.97807  -2 
   6   6   5 39.7815 0.97807   1 
  -7  -2   5 253.874 4.31181  -2 
   7   6   5 253.874 4.31181   1 
  -8  -2   5 25.9251 1.18350  -2 
   8   6   5 25.9251 1.18350   1 
  -9  -2   5 253.896 5.39273  -2 
   9   6   5 253.896 5.39273   1 
 -10  -2   5 68.6375 2.29647  -2 
  10   6   5 68.6375 2.29647   1 
 -11  -2   5 178.728 4.62627  -2 
  11   6   5 178.728 4.62627   1 
 -12  -2   5 0.71161 1.30890  -2 
  12   6   5 0.71161 1.30890   1 
 -13  -2   5 17.0527 1.93310  -2 
  13   6   5 17.0527 1.93310   1 
  12  -3   5 35.2602 3.60526  -2 
 -12   7   5 35.2602 3.60526   1 
  11  -3   5 120.706 4.57340  -2 
 -11   7   5 120.706 4.57340   1 
  10  -3   5 56.0639 2.80844  -2 
 -10   7   5 56.0639 2.80844   1 
   9  -3   5 129.911 3.90569  -2 
  -9   7   5 129.911 3.90569   1 
   8  -3   5 67.5031 2.33201  -2 
  -8   7   5 67.5031 2.33201   1 
   7  -3   5 266.712 4.61032  -2 
  -7   7   5 266.712 4.61032   1 
   6  -3   5 98.5384 2.15925  -2 
  -6   7   5 98.5384 2.15925   1 
   5  -3   5 729.188 10.4207  -2 
  -5   7   5 729.188 10.4207   1 
   4  -3   5 133.676 2.10570  -2 
  -4   7   5 133.676 2.10570   1 
   3  -3   5 922.316 12.1071  -2 
  -3   7   5 922.316 12.1071   1 
   2  -3   5 450.789 6.06252  -2 
  -2   7   5 450.789 6.06252   1 
   1  -3   5 326.941 4.22645  -2 
  -1   7   5 326.941 4.22645   1 
   0  -3   5 148.303 2.05002  -2 
   0   7   5 148.303 2.05002   1 
  -1  -3   5 393.054 5.01019  -2 
   1   7   5 393.054 5.01019   1 
  -2  -3   5 2134.63 25.8998  -2 
   2   7   5 2134.63 25.8998   1 
  -3  -3   5 418.642 5.39208  -2 
   3   7   5 418.642 5.39208   1 
  -4  -3   5 1448.57 17.8214  -2 
   4   7   5 1448.57 17.8214   1 
  -5  -3   5 19.1650 0.63125  -2 
   5   7   5 19.1650 0.63125   1 
  -6  -3   5 549.472 7.10948  -2 
   6   7   5 549.472 7.10948   1 
  -7  -3   5 65.8456 1.67552  -2 
   7   7   5 65.8456 1.67552   1 
  -8  -3   5 357.793 5.89035  -2 
   8   7   5 357.793 5.89035   1 
  -9  -3   5 26.1119 1.35152  -2 
   9   7   5 26.1119 1.35152   1 
 -10  -3   5 490.707 10.0376  -2 
  10   7   5 490.707 10.0376   1 
 -11  -3   5 66.4927 2.62048  -2 
  11   7   5 66.4927 2.62048   1 
 -12  -3   5 14.3671 1.73549  -2 
  12   7   5 14.3671 1.73549   1 
 -13  -3   5 35.0083 2.62908  -2 
  13   7   5 35.0083 2.62908   1 
  11  -4   5 107.423 4.35647  -2 
 -11   8   5 107.423 4.35647   1 
  10  -4   5 11.9645 2.27680  -2 
 -10   8   5 11.9645 2.27680   1 
   9  -4   5 58.8199 2.69728  -2 
  -9   8   5 58.8199 2.69728   1 
   8  -4   5 72.3073 2.44660  -2 
  -8   8   5 72.3073 2.44660   1 
   7  -4   5 8.22352 1.08702  -2 
  -7   8   5 8.22352 1.08702   1 
   6  -4   5 4.22386 0.91836  -2 
  -6   8   5 4.22386 0.91836   1 
   5  -4   5 428.510 6.43494  -2 
  -5   8   5 428.510 6.43494   1 
   4  -4   5 255.839 4.01113  -2 
  -4   8   5 255.839 4.01113   1 
   3  -4   5 62.9630 1.22635  -2 
  -3   8   5 62.9630 1.22635   1 
   2  -4   5 273.941 3.87080  -2 
  -2   8   5 273.941 3.87080   1 
   1  -4   5 210.888 3.02717  -2 
  -1   8   5 210.888 3.02717   1 
   0  -4   5 5.82368 0.46021  -2 
   0   8   5 5.82368 0.46021   1 
  -1  -4   5 588.754 7.79728  -2 
   1   8   5 588.754 7.79728   1 
  -2  -4   5 219.577 2.98559  -2 
   2   8   5 219.577 2.98559   1 
  -3  -4   5 1059.41 13.1040  -2 
   3   8   5 1059.41 13.1040   1 
  -4  -4   5 10.0268 0.59196  -2 
   4   8   5 10.0268 0.59196   1 
  -5  -4   5 73.2558 1.22328  -2 
   5   8   5 73.2558 1.22328   1 
  -6  -4   5 8.33253 0.63206  -2 
   6   8   5 8.33253 0.63206   1 
  -7  -4   5 485.657 7.57205  -2 
   7   8   5 485.657 7.57205   1 
  -8  -4   5 21.2362 1.12736  -2 
   8   8   5 21.2362 1.12736   1 
  -9  -4   5 262.750 4.99744  -2 
   9   8   5 262.750 4.99744   1 
 -10  -4   5 33.5860 1.68022  -2 
  10   8   5 33.5860 1.68022   1 
 -11  -4   5 2.35614 1.84190  -2 
  11   8   5 2.35614 1.84190   1 
 -12  -4   5 -4.8096 1.30806  -2 
  12   8   5 -4.8096 1.30806   1 
 -13  -4   5 82.6024 3.67598  -2 
  13   8   5 82.6024 3.67598   1 
  11  -5   5 31.1791 3.39451  -2 
 -11   9   5 31.1791 3.39451   1 
  10  -5   5 56.2852 3.19084  -2 
 -10   9   5 56.2852 3.19084   1 
   9  -5   5 209.466 5.47265  -2 
  -9   9   5 209.466 5.47265   1 
   8  -5   5 116.880 3.23368  -2 
  -8   9   5 116.880 3.23368   1 
   7  -5   5 158.133 3.71826  -2 
  -7   9   5 158.133 3.71826   1 
   6  -5   5 18.5078 1.12421  -2 
  -6   9   5 18.5078 1.12421   1 
   5  -5   5 472.210 7.27215  -2 
  -5   9   5 472.210 7.27215   1 
   4  -5   5 271.186 4.27375  -2 
  -4   9   5 271.186 4.27375   1 
   3  -5   5 459.667 6.34823  -2 
  -3   9   5 459.667 6.34823   1 
   2  -5   5 22.6515 0.74689  -2 
  -2   9   5 22.6515 0.74689   1 
   1  -5   5 713.997 9.46140  -2 
  -1   9   5 713.997 9.46140   1 
   0  -5   5 139.906 2.11149  -2 
   0   9   5 139.906 2.11149   1 
  -1  -5   5 514.869 6.74404  -2 
   1   9   5 514.869 6.74404   1 
  -2  -5   5 90.5874 1.49093  -2 
   2   9   5 90.5874 1.49093   1 
  -3  -5   5 139.503 2.03455  -2 
   3   9   5 139.503 2.03455   1 
  -4  -5   5 291.704 3.50973  -2 
   4   9   5 291.704 3.50973   1 
  -5  -5   5 306.743 3.74085  -2 
   5   9   5 306.743 3.74085   1 
  -6  -5   5 314.909 4.51851  -2 
   6   9   5 314.909 4.51851   1 
  -7  -5   5 47.9859 1.36387  -2 
   7   9   5 47.9859 1.36387   1 
  -8  -5   5 66.6617 1.91010  -2 
   8   9   5 66.6617 1.91010   1 
  -9  -5   5 89.8929 2.38612  -2 
   9   9   5 89.8929 2.38612   1 
 -10  -5   5 92.1568 2.66825  -2 
  10   9   5 92.1568 2.66825   1 
 -11  -5   5 4.79385 1.36122  -2 
  11   9   5 4.79385 1.36122   1 
 -12  -5   5 36.4168 2.26735  -2 
  12   9   5 36.4168 2.26735   1 
 -13  -5   5 11.7683 4.99840  -2 
  13   9   5 11.7683 4.99840   1 
  11  -6   5 166.840 6.58368  -2 
 -11  10   5 166.840 6.58368   1 
  10  -6   5 31.6056 2.74207  -2 
 -10  10   5 31.6056 2.74207   1 
   9  -6   5 39.3291 2.68323  -2 
  -9  10   5 39.3291 2.68323   1 
   8  -6   5 13.3009 1.77390  -2 
  -8  10   5 13.3009 1.77390   1 
   7  -6   5 40.8735 1.88328  -2 
  -7  10   5 40.8735 1.88328   1 
   6  -6   5 55.5668 1.68523  -2 
  -6  10   5 55.5668 1.68523   1 
   5  -6   5 192.346 3.46949  -2 
  -5  10   5 192.346 3.46949   1 
   4  -6   5 66.2303 1.61020  -2 
  -4  10   5 66.2303 1.61020   1 
   3  -6   5 678.504 9.70212  -2 
  -3  10   5 678.504 9.70212   1 
   2  -6   5 49.0860 1.16810  -2 
  -2  10   5 49.0860 1.16810   1 
   1  -6   5 16.4720 0.67099  -2 
  -1  10   5 16.4720 0.67099   1 
   0  -6   5 46.6862 0.97660  -2 
   0  10   5 46.6862 0.97660   1 
  -1  -6   5 7.76394 0.53457  -2 
   1  10   5 7.76394 0.53457   1 
  -2  -6   5 87.7622 1.51164  -2 
   2  10   5 87.7622 1.51164   1 
  -3  -6   5 197.888 2.60342  -2 
   3  10   5 197.888 2.60342   1 
  -4  -6   5 277.431 3.53481  -2 
   4  10   5 277.431 3.53481   1 
  -5  -6   5 112.372 1.77929  -2 
   5  10   5 112.372 1.77929   1 
  -6  -6   5 8.06336 0.72595  -2 
   6  10   5 8.06336 0.72595   1 
  -7  -6   5 81.5378 1.82191  -2 
   7  10   5 81.5378 1.82191   1 
  -8  -6   5 0.91120 0.83447  -2 
   8  10   5 0.91120 0.83447   1 
  -9  -6   5 23.5468 1.36801  -2 
   9  10   5 23.5468 1.36801   1 
 -10  -6   5 60.7504 2.14580  -2 
  10  10   5 60.7504 2.14580   1 
 -11  -6   5 80.2863 2.77203  -2 
  11  10   5 80.2863 2.77203   1 
 -12  -6   5 21.5582 2.66001  -2 
  12  10   5 21.5582 2.66001   1 
 -13  -6   5 -3.1167 1.55627  -2 
  13  10   5 -3.1167 1.55627   1 
  10  -7   5 69.5128 3.65342  -2 
 -10  11   5 69.5128 3.65342   1 
   9  -7   5 169.585 5.35511  -2 
  -9  11   5 169.585 5.35511   1 
   8  -7   5 156.707 4.46471  -2 
  -8  11   5 156.707 4.46471   1 
   7  -7   5 156.503 3.83198  -2 
  -7  11   5 156.503 3.83198   1 
   6  -7   5 57.6225 2.08380  -2 
  -6  11   5 57.6225 2.08380   1 
   5  -7   5 13.1765 1.02977  -2 
  -5  11   5 13.1765 1.02977   1 
   4  -7   5 269.205 4.49412  -2 
  -4  11   5 269.205 4.49412   1 
   3  -7   5 489.339 7.23548  -2 
  -3  11   5 489.339 7.23548   1 
   2  -7   5 30.8509 1.14091  -2 
  -2  11   5 30.8509 1.14091   1 
   1  -7   5 264.408 3.88636  -2 
  -1  11   5 264.408 3.88636   1 
   0  -7   5 491.741 6.28477  -2 
   0  11   5 491.741 6.28477   1 
  -1  -7   5 235.363 3.25568  -2 
   1  11   5 235.363 3.25568   1 
  -2  -7   5 62.8152 1.24131  -2 
   2  11   5 62.8152 1.24131   1 
  -3  -7   5 312.987 3.75808  -2 
   3  11   5 312.987 3.75808   1 
  -4  -7   5 246.424 3.27216  -2 
   4  11   5 246.424 3.27216   1 
  -5  -7   5 205.990 3.15999  -2 
   5  11   5 205.990 3.15999   1 
  -6  -7   5 157.950 2.63102  -2 
   6  11   5 157.950 2.63102   1 
  -7  -7   5 84.4818 1.78929  -2 
   7  11   5 84.4818 1.78929   1 
  -8  -7   5 51.6959 1.62402  -2 
   8  11   5 51.6959 1.62402   1 
  -9  -7   5 2.85845 1.02836  -2 
   9  11   5 2.85845 1.02836   1 
 -10  -7   5 104.997 3.16096  -2 
  10  11   5 104.997 3.16096   1 
 -11  -7   5 42.1736 2.10378  -2 
  11  11   5 42.1736 2.10378   1 
 -12  -7   5 0.30201 2.05570  -2 
  12  11   5 0.30201 2.05570   1 
 -13  -7   5 5.41024 4.62829  -2 
  13  11   5 5.41024 4.62829   1 
  10  -8   5 15.5554 3.20237  -2 
 -10  12   5 15.5554 3.20237   1 
   9  -8   5 7.42618 2.29768  -2 
  -9  12   5 7.42618 2.29768   1 
   8  -8   5 15.4059 2.26996  -2 
  -8  12   5 15.4059 2.26996   1 
   7  -8   5 290.083 6.73992  -2 
  -7  12   5 290.083 6.73992   1 
   6  -8   5 15.6021 1.51713  -2 
  -6  12   5 15.6021 1.51713   1 
   5  -8   5 216.172 4.19112  -2 
  -5  12   5 216.172 4.19112   1 
   4  -8   5 100.161 2.22685  -2 
  -4  12   5 100.161 2.22685   1 
   3  -8   5 242.974 4.11118  -2 
  -3  12   5 242.974 4.11118   1 
   2  -8   5 73.6323 1.81267  -2 
  -2  12   5 73.6323 1.81267   1 
   1  -8   5 729.758 10.4062  -2 
  -1  12   5 729.758 10.4062   1 
   0  -8   5 158.283 2.73512  -2 
   0  12   5 158.283 2.73512   1 
  -1  -8   5 1033.96 13.6517  -2 
   1  12   5 1033.96 13.6517   1 
  -2  -8   5 131.454 2.20929  -2 
   2  12   5 131.454 2.20929   1 
  -3  -8   5 720.149 8.96538  -2 
   3  12   5 720.149 8.96538   1 
  -4  -8   5 175.996 2.76100  -2 
   4  12   5 175.996 2.76100   1 
  -5  -8   5 33.0984 1.03062  -2 
   5  12   5 33.0984 1.03062   1 
  -6  -8   5 91.6672 1.83224  -2 
   6  12   5 91.6672 1.83224   1 
  -7  -8   5 323.806 5.05294  -2 
   7  12   5 323.806 5.05294   1 
  -8  -8   5 43.6473 1.51342  -2 
   8  12   5 43.6473 1.51342   1 
  -9  -8   5 161.088 3.45539  -2 
   9  12   5 161.088 3.45539   1 
 -10  -8   5 59.6318 2.34750  -2 
  10  12   5 59.6318 2.34750   1 
 -11  -8   5 6.62095 1.39343  -2 
  11  12   5 6.62095 1.39343   1 
 -12  -8   5 8.70799 1.56266  -2 
  12  12   5 8.70799 1.56266   1 
   9  -9   5 0.66701 2.33194  -2 
  -9  13   5 0.66701 2.33194   1 
   8  -9   5 163.324 5.23906  -2 
  -8  13   5 163.324 5.23906   1 
   7  -9   5 63.1470 3.06266  -2 
  -7  13   5 63.1470 3.06266   1 
   6  -9   5 205.259 4.63796  -2 
  -6  13   5 205.259 4.63796   1 
   5  -9   5 86.6065 2.58840  -2 
  -5  13   5 86.6065 2.58840   1 
   4  -9   5 142.606 3.08157  -2 
  -4  13   5 142.606 3.08157   1 
   3  -9   5 20.7072 1.13825  -2 
  -3  13   5 20.7072 1.13825   1 
   2  -9   5 24.4849 1.03993  -2 
  -2  13   5 24.4849 1.03993   1 
   1  -9   5 140.995 2.68538  -2 
  -1  13   5 140.995 2.68538   1 
   0  -9   5 1458.85 18.6054  -2 
   0  13   5 1458.85 18.6054   1 
  -1  -9   5 219.137 3.15944  -2 
   1  13   5 219.137 3.15944   1 
  -2  -9   5 446.220 6.25788  -2 
   2  13   5 446.220 6.25788   1 
  -3  -9   5 133.352 2.24639  -2 
   3  13   5 133.352 2.24639   1 
  -4  -9   5 108.189 1.96454  -2 
   4  13   5 108.189 1.96454   1 
  -5  -9   5 8.88060 0.75386  -2 
   5  13   5 8.88060 0.75386   1 
  -6  -9   5 252.171 4.07982  -2 
   6  13   5 252.171 4.07982   1 
  -7  -9   5 28.6750 1.20123  -2 
   7  13   5 28.6750 1.20123   1 
  -8  -9   5 183.682 3.33806  -2 
   8  13   5 183.682 3.33806   1 
  -9  -9   5 -0.9618 1.11255  -2 
   9  13   5 -0.9618 1.11255   1 
 -10  -9   5 123.201 3.49363  -2 
  10  13   5 123.201 3.49363   1 
 -11  -9   5 20.8682 1.66110  -2 
  11  13   5 20.8682 1.66110   1 
 -12  -9   5 15.5583 1.74621  -2 
  12  13   5 15.5583 1.74621   1 
   9 -10   5 35.7237 3.55396  -2 
  -9  14   5 35.7237 3.55396   1 
   8 -10   5 99.3389 4.08984  -2 
  -8  14   5 99.3389 4.08984   1 
   7 -10   5 156.001 4.98710  -2 
  -7  14   5 156.001 4.98710   1 
   6 -10   5 71.2712 2.88936  -2 
  -6  14   5 71.2712 2.88936   1 
   5 -10   5 141.626 3.55758  -2 
  -5  14   5 141.626 3.55758   1 
   4 -10   5 13.1624 1.40287  -2 
  -4  14   5 13.1624 1.40287   1 
   3 -10   5 13.8571 1.32729  -2 
  -3  14   5 13.8571 1.32729   1 
   2 -10   5 260.184 4.37679  -2 
  -2  14   5 260.184 4.37679   1 
   1 -10   5 152.195 2.67510  -2 
  -1  14   5 152.195 2.67510   1 
   0 -10   5 164.317 2.80257  -2 
   0  14   5 164.317 2.80257   1 
  -1 -10   5 531.413 7.58279  -2 
   1  14   5 531.413 7.58279   1 
  -2 -10   5 127.823 2.33523  -2 
   2  14   5 127.823 2.33523   1 
  -3 -10   5 71.1351 1.51933  -2 
   3  14   5 71.1351 1.51933   1 
  -4 -10   5 58.1764 1.38392  -2 
   4  14   5 58.1764 1.38392   1 
  -5 -10   5 50.3791 1.32679  -2 
   5  14   5 50.3791 1.32679   1 
  -6 -10   5 77.2015 1.82386  -2 
   6  14   5 77.2015 1.82386   1 
  -7 -10   5 412.757 6.28809  -2
[truncated: 667,490 more chars]
